# Supplementary material for: Catalytic Asymmetric Diastereodivergent Synthesis of 2-Alkenylindoles Bearing both Axial and Central Chirality
Source: PubMed Central journal article supplement — Precis Chem. 2024 Apr 23;2(5):208–20. doi: 10.1021/prechem.4c00008 (PMC11504580; doi:10.1021/prechem.4c00008), 2024-04-23
Supplement: pc4c00008_si_001.pdf [file pc4c00008_si_001.pdf]

## ***Supporting Information for***

### **Catalytic Asymmetric Diastereodivergent Synthesis of 2-Alkenylindoles**

#### **Bearing both Axial and Central Chirality**

Shuang Yang,<sup>‡,a</sup> Jia-Bo Huang,<sup>‡,b</sup> Da-Hua Wang,<sup>‡,c</sup> Ning-Yi Wang,<sup>a</sup> Yu-Yu Chen,<sup>a</sup> Xin-Yan Ke,<sup>b</sup>

Hao Chen,<sup>a</sup> Shao-Fei Ni,<sup>\*,b</sup> Yu-Chen Zhang<sup>\*,a</sup> and Feng Shi<sup>\*,ad</sup>

<sup>a</sup>*Research Center of Chiral Functional Heterocycles, School of Chemistry and Materials Science, Jiangsu Normal University, Xuzhou, 221116, China*

<sup>b</sup>*Department of Chemistry, Key Laboratory for Preparation and Application of Ordered Structural Materials of Guangdong Province, Shantou University, Shantou, 515063, China*

<sup>c</sup>*Department of Otolaryngology, Xuzhou First People's Hospital, Affiliated Xuzhou Municipal Hospital of Xuzhou Medical University, Xuzhou, 221002, China*

<sup>d</sup>*School of Petrochemical Engineering, Changzhou University, Changzhou 213164, China*

E-mail: [fshi@jsnu.edu.cn](mailto:fshi@jsnu.edu.cn); [zhangyc@jsnu.edu.cn](mailto:zhangyc@jsnu.edu.cn); [sfni@stu.edu.cn](mailto:sfni@stu.edu.cn)

## Contents:

1. General information (S3)
2. General procedure for the synthesis of substrates 1 (S3-S5)
3. Conditions optimization for the synthesis of 3aa and 4aa (S7-S10)
4. Conditions optimization for the synthesis of 3fa-3ga and 4fa-4ga (S11-S14)
5. General procedure for the synthesis of products 3 and 4 (S15)
6. Synthetic procedure and characterization data of products 3 and 4 (S16-S36)
7. Procedure for one-mmol-scale synthesis of product 3aa and 4aa (S37)
8. Procedure for the synthesis of 8-10, 13 and characterization data (S38-S40)
9. Determination of the absolute configurations of products 3 and 4 (S41-S43)
10. Synthetic procedure and characterization data of products S12 (S44)
11. X-ray single crystal data for compounds 3aa and *rac*-4ak (S45-S48)
12. NMR spectra of substrates 1 (S49-S57)
13. NMR spectra of compounds 3, 4, 8-10, 13 and S12 (S58-S105)
14. HPLC traces of compounds 3, 4, 8, 10, 13 and S12 (S106-S146)
15. Biological evaluation of selected compounds 3 and 4 (S147-S148)
16. Theoretical calculations (S149-S279)

## 1. General information

$^1\text{H}$  and  $^{13}\text{C}$  NMR spectra were measured at 400 and 100 MHz, respectively. The solvent used for NMR spectroscopy was  $\text{CDCl}_3$ , using tetramethylsilane as the internal reference. HRMS (ESI) was determined by a HRMS/MS instrument. Enantiomeric ratios (*er*) were determined by chiral high-performance liquid chromatography (chiral HPLC). The chiral columns used for the determination of enantiomeric ratios by chiral HPLC were Chiralpak columns. Optical rotation values were measured with instruments operating at  $\lambda = 589$  nm, corresponding to the sodium D line at the temperatures indicated. The X-ray source used for the single crystal X-ray diffraction analysis of compounds **3aa** and *rac*-**4ak** was  $\text{GaK}\alpha$  ( $\lambda = 1.34139$ ), and the thermal ellipsoid was drawn at the 30% probability level. Analytical grade solvents for the column chromatography were distilled before use. All starting materials commercially available were used directly.

## 2. General procedure for the synthesis of substrates 1

### General procedure for the synthesis of substrates 1:

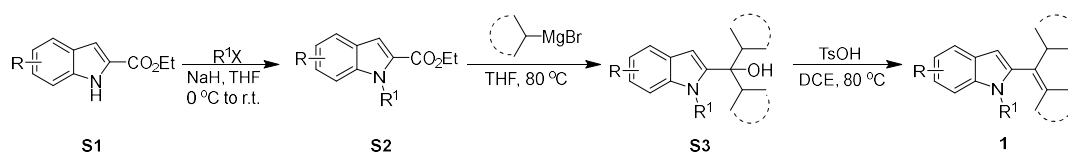

**S1 to S2:** To an ice-bath cooled suspension of NaH (12 mmol, 1.2 equiv.) in THF (10 mL) was added dropwise the corresponding **S1** (10 mmol, 1 equiv.) in THF (20 mL) at 0°C.  $\text{R}^1\text{X}$  (12 mmol, 1.2 equiv.) was added and the mixture was stirred at room temperature for 10 h. After the completion of the reaction indicated by TLC, the reaction mixture was quenched by saturated ammonium chloride solution and extracted by ethyl acetate for three times. The combined organic layers were dried and concentrated under reduced pressure to afford crude product **S2**.

**S2 to S3:** Under argon atmosphere, cyclohexylmagnesium bromide (40 mL, 1 mol/L, 4 equiv.) was added to a Schlenk bottle. Then, the solution of **S2** (10 mmol, 1 equiv.) in anhydrous THF (10 mL) was added dropwise to the Schlenk bottle at 0 °C. Subsequently, the reaction mixture was stirred at 80 °C for 5 h. After the completion of the reaction indicated by TLC, the reaction mixture was quenched by saturated ammonium chloride solution and extracted by ethyl acetate for three times. The combined organic layers were dried and concentrated under reduced pressure to afford crude product **S3**.

**S3 to 1:** To the mixture of product **S3** (5 mmol, 1.0 equiv.) in DCE (20 mL) was added TsOH (5 mmol, 1.0 equiv.) at room temperature. Then, the reaction mixture was stirred at 80 °C for 10 h. After the completion of the reaction which was indicated by TLC, the reaction mixture was concentrated and the residue was further purified through flash column chromatography on silica gel (PE) to afford substrates **1** as white solid.

### Characterization data of substrates 1:

#### 2-(cyclohexyl(cyclohexylidene)methyl)-1-methyl-1H-indole (1a):

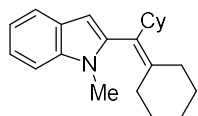

63% yield (0.97 g); white solid; m.p. 106-107 °C;  $^1\text{H}$  NMR (400 MHz,  $\text{CDCl}_3$ )  $\delta$  7.61 (d,  $J$  = 7.7 Hz, 1H), 7.35 – 7.28 (m, 1H), 7.22 – 7.16 (m, 1H), 7.16 – 7.08 (m, 1H), 6.17 (s, 1H), 3.58 (s, 3H), 2.77 – 2.69 (m, 1H), 2.53 – 2.45 (m, 1H), 2.40 – 2.32 (m, 1H), 1.78 – 1.67 (m, 5H), 1.66 – 1.61 (m, 2H), 1.60 – 1.55 (m, 2H), 1.53 – 1.36 (m, 5H), 1.34 – 1.21 (m, 2H), 1.04 – 0.95 (m, 1H), 0.88 – 0.77 (m, 1H);  $^{13}\text{C}$  NMR (100 MHz,  $\text{CDCl}_3$ )  $\delta$  141.7, 140.3, 136.6, 128.2, 128.1, 120.3, 119.9, 119.2, 109.2, 100.6, 40.3, 33.1, 32.7, 31.0, 30.2, 30.1, 28.6, 27.9, 26.9, 26.7, 26.5, 25.9; IR (KBr): 2925, 2850, 2715, 1638, 1628, 1464, 1447, 1381, 1348, 1230, 1097, 774; ESI FTMS exact mass calcd for  $(\text{C}_{22}\text{H}_{29}\text{N}+\text{H})^+$  requires  $m/z$  308.2373, found  $m/z$  308.2379.

#### 2-(cyclohexyl(cyclohexylidene)methyl)-5-fluoro-1-methyl-1H-indole (1b):

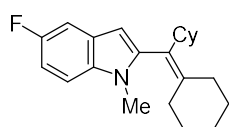

40% yield (0.65 g); white solid; m.p. 74-75 °C;  $^1\text{H}$  NMR (400 MHz,  $\text{CDCl}_3$ )  $\delta$  7.25 – 7.15 (m, 2H), 6.95 – 6.87 (m, 1H), 6.11 (s, 1H), 3.55 (s, 3H), 2.75 – 2.67 (m, 1H), 2.51 – 2.43 (m, 1H), 2.37 – 2.29 (m, 1H), 1.78 – 1.66 (m, 5H), 1.62 – 1.53 (m, 5H), 1.49 – 1.35 (m, 4H), 1.33 – 1.19 (m, 2H), 1.02 – 0.93 (m, 1H), 0.84 – 0.73 (m, 1H);  $^{13}\text{C}$  NMR (100 MHz,  $\text{CDCl}_3$ )  $\delta$  157.9 (d,  $J$  = 231.8 Hz), 142.0, 141.9, 133.2, 128.1 (d,  $J$  = 10.0 Hz), 109.6 (d,  $J$  = 9.8 Hz), 108.3 (d,  $J$  = 25.9 Hz), 104.6 (d,  $J$  = 23.0 Hz), 100.6, 100.5, 40.3, 33.1, 32.7, 31.0, 30.3, 30.0, 28.6, 27.9, 26.9, 26.7, 26.5, 25.8;  $^{19}\text{F}$  NMR (376 MHz,  $\text{CDCl}_3$ )  $\delta$  -125.9; IR (KBr): 2925, 2851, 1478, 1447, 1386, 1328, 1253, 1189, 1120, 851; ESI FTMS exact mass calcd for  $(\text{C}_{22}\text{H}_{28}\text{FN}+\text{H})^+$  requires  $m/z$  326.2279, found  $m/z$  326.2280.

#### 5-chloro-2-(cyclohexyl(cyclohexylidene)methyl)-1-methyl-1H-indole (1c):

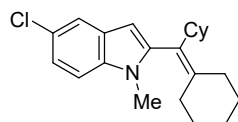

52% yield (0.89 g); white solid; m.p. 105-106 °C;  $^1\text{H}$  NMR (400 MHz,  $\text{CDCl}_3$ )  $\delta$  7.53 (s, 1H), 7.22 – 7.16 (m, 1H), 7.14 – 7.07 (m, 1H), 6.10 (s, 1H), 3.54 (s, 3H), 2.75 – 2.66 (m, 1H), 2.51 – 2.43 (m, 1H), 2.37 – 2.29 (m, 1H), 1.79 – 1.66 (m, 5H), 1.62 – 1.56 (m, 4H), 1.53 – 1.41 (m, 3H), 1.39 – 1.22 (m, 4H), 1.01 – 0.93 (m, 1H), 0.82 – 0.71 (m, 1H);  $^{13}\text{C}$  NMR (100 MHz,  $\text{CDCl}_3$ )  $\delta$  142.1, 141.8, 135.0, 129.0, 127.9, 124.9, 120.4, 119.2, 110.1, 100.2, 40.2, 33.1, 32.7, 31.0, 30.3, 30.0, 28.6, 27.9, 26.9, 26.7, 26.5, 25.8; IR (KBr): 3421, 2926, 2851, 1633, 1606, 1468, 1353, 1265, 1116, 914, 749; ESI FTMS exact mass calcd for  $(\text{C}_{22}\text{H}_{28}\text{ClN}+\text{H})^+$  requires  $m/z$  342.1983, found  $m/z$  342.1987.

#### 5-bromo-2-(cyclohexyl(cyclohexylidene)methyl)-1-methyl-1H-indole (1d):

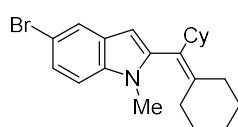

57% yield (1.10 g); white solid; m.p. 102-103 °C;  $^1\text{H}$  NMR (400 MHz,  $\text{CDCl}_3$ )  $\delta$  7.69 (s, 1H), 7.26 – 7.21 (m, 1H), 7.18 – 7.12 (m, 1H), 6.10 (s, 1H), 3.54 (s, 3H), 2.75 – 2.64 (m, 1H), 2.51 – 2.43 (m, 1H), 2.38 – 2.28 (m, 1H), 1.76 – 1.68 (m, 4H), 1.63 – 1.55 (m, 5H), 1.53 – 1.41 (m, 3H), 1.39 – 1.33 (m, 2H), 1.32 – 1.20 (m, 2H), 1.03 – 0.95 (m, 1H), 0.82 – 0.70 (m, 1H);

$^{13}\text{C}$  NMR (100 MHz,  $\text{CDCl}_3$ )  $\delta$  142.1, 141.6, 135.2, 129.6, 127.8, 123.0, 122.3, 112.5, 110.6, 100.1, 40.2, 33.1, 32.7, 30.9, 30.3, 30.0, 28.6, 27.9, 26.9, 26.7, 26.4, 25.8; IR (KBr): 2925, 2851, 1627, 1466, 1447, 1377, 1254, 787; ESI FTMS exact mass calcd for  $(\text{C}_{22}\text{H}_{28}\text{BrN}+\text{H})^+$  requires  $m/z$  386.1478, found  $m/z$  386.1473.

**1-benzyl-2-(cyclohexyl(cyclohexylidene)methyl)-1H-indole (1e):**

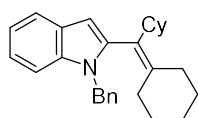

70% yield (1.34 g); white solid; m.p. 98-99 °C;  $^1\text{H}$  NMR (400 MHz,  $\text{CDCl}_3$ )  $\delta$  7.62 (d,  $J$  = 7.7 Hz, 1H), 7.28 – 7.26 (m, 1H), 7.26 – 7.18 (m, 2H), 7.12 – 6.99 (m, 5H), 6.24 (s, 1H), 5.29 – 5.20 (m, 2H), 2.74 – 2.59 (m, 1H), 2.51 – 2.40 (m, 1H), 2.32 – 2.19 (m, 1H), 1.86 – 1.78 (m, 1H), 1.76 – 1.62 (m, 4H), 1.59 – 1.52 (m, 4H), 1.48 – 1.37 (m, 3H), 1.32 – 1.15 (m, 4H), 1.02 – 0.94 (m, 1H), 0.88 – 0.79 (m, 1H);  $^{13}\text{C}$  NMR (100 MHz,  $\text{CDCl}_3$ )  $\delta$  142.9, 140.7, 137.9, 136.4, 128.5, 128.4, 128.2, 126.9, 126.6, 120.5, 119.9, 119.4, 110.9, 101.4, 47.8, 40.4, 33.5, 33.0, 31.3, 30.2, 28.5, 28.0, 26.8, 26.5, 25.9; IR (KBr): 3420, 2925, 2851, 1708, 1593, 1461, 1352, 1309, 1160, 727; ESI FTMS exact mass calcd for  $(\text{C}_{28}\text{H}_{33}\text{N}+\text{H})^+$  requires  $m/z$  384.2686, found  $m/z$  384.2691.

**2-(cyclopentyl(cyclopentylidene)methyl)-1-methyl-1H-indole (1f):**

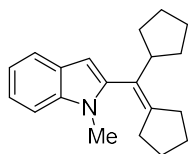

29% yield (0.41 g); colorless oil;  $^1\text{H}$  NMR (400 MHz,  $\text{CDCl}_3$ )  $\delta$  7.61 (d,  $J$  = 7.8 Hz, 1H), 7.35 – 7.29 (m, 1H), 7.23 – 7.16 (m, 1H), 7.15 – 7.08 (m, 1H), 6.17 (s, 1H), 3.58 (s, 3H), 3.01 – 2.87 (m, 1H), 2.59 – 2.41 (m, 2H), 1.98 – 1.85 (m, 2H), 1.83 – 1.65 (m, 4H), 1.63 – 1.56 (m, 4H), 1.52 – 1.45 (m, 2H), 1.02 – 0.84 (m, 2H);  $^{13}\text{C}$  NMR (100 MHz,  $\text{CDCl}_3$ )  $\delta$  146.9, 140.5, 136.8, 128.2, 125.9, 120.4, 120.1, 119.2, 109.3, 99.8, 44.8, 32.7, 30.9, 30.3, 30.3, 29.8, 26.6, 26.5, 25.0, 24.7; IR (KBr): 3460, 3053, 2960, 2928, 2868, 1647, 1464, 1310, 1080, 749; ESI FTMS exact mass calcd for  $(\text{C}_{20}\text{H}_{25}\text{N}-\text{H})^-$  requires  $m/z$  278.1914, found  $m/z$  278.1931.

**2-(2,4-dimethylpent-2-en-3-yl)-1-methyl-1H-indole (1g):**

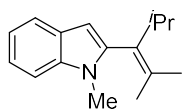

68% yield (0.77 g); colorless oil;  $^1\text{H}$  NMR (400 MHz,  $\text{CDCl}_3$ )  $\delta$  7.66 (d,  $J$  = 7.8 Hz, 1H), 7.41 – 7.34 (m, 1H), 7.27 – 7.21 (m, 1H), 7.19 – 7.13 (m, 1H), 6.24 (s, 1H), 3.60 (s, 3H), 3.20 – 3.10 (m, 1H), 1.96 (s, 3H), 1.47 (s, 3H), 1.16 (d,  $J$  = 6.8 Hz, 3H), 0.81 (d,  $J$  = 6.5 Hz, 3H);  $^{13}\text{C}$  NMR (100 MHz,  $\text{CDCl}_3$ )  $\delta$  139.5, 136.7, 133.3, 131.7, 128.1, 120.4, 120.0, 119.2, 109.2, 100.4, 30.4, 29.9, 22.8, 22.0, 20.6, 19.5; IR (KBr): 3481, 2951, 2866, 1528, 1464, 1365, 1309, 1130, 748; ESI FTMS exact mass calcd for  $(\text{C}_{16}\text{H}_{21}\text{N}-\text{H})^-$  requires  $m/z$  221.1601, found  $m/z$  221.1619.

**2-(cyclohexyl(cyclohexylidene)methyl)-6-methoxy-1-methyl-1H-indole (1h):**

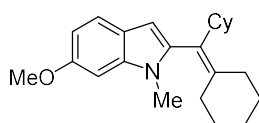

39% yield (0.66 g); white solid; m.p. 89-90 °C;  $^1\text{H}$  NMR (400 MHz,  $\text{CDCl}_3$ )  $\delta$  7.47 (d,  $J$  = 8.8 Hz, 1H), 6.83 – 6.75 (m, 2H), 6.08 (s, 1H), 3.91 (s, 3H), 3.52 (s, 3H), 2.76 – 2.65 (m, 1H), 2.52 – 2.43 (m, 1H), 2.39 – 2.30 (m, 1H), 1.80 – 1.69 (m, 4H), 1.65 – 1.56 (m, 5H), 1.53 – 1.21 (m, 7H), 1.04 – 0.94 (m, 1H), 0.89 – 0.78 (m, 1H);  $^{13}\text{C}$  NMR (100 MHz,  $\text{CDCl}_3$ )  $\delta$

155.4, 141.8, 139.2, 137.2, 128.3, 122.4, 120.4, 108.7, 100.2, 93.4, 55.9, 40.3, 33.1, 32.6, 31.0, 30.2, 30.1, 28.6, 27.9, 27.0, 26.7, 26.5, 25.9; IR (KBr): 2924, 2850, 1491, 1447, 1377, 1293, 1241, 1213, 1088, 811; ESI FTMS exact mass calcd for  $(C_{23}H_{31}NO+H)^+$  requires m/z 338.2479, found m/z 338.2472.

### 3. Conditions optimization for the synthesis of 3aa and 4aa

Table S1. Conditions optimization for the synthesis of 3aa<sup>a</sup>

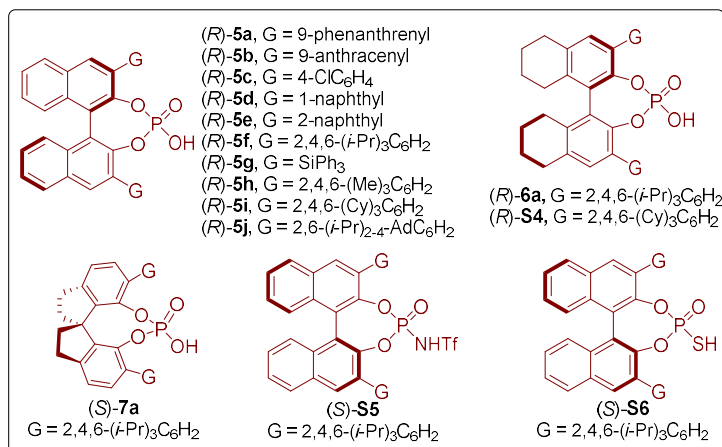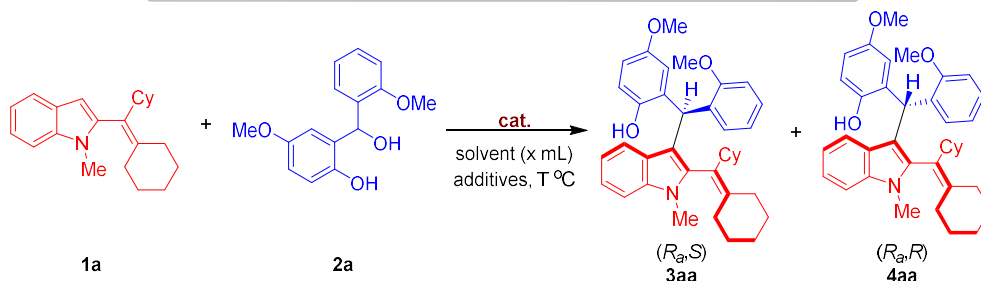

| entry | cat.   | solvent            | T (°C) | additive | 1a:2a | x (mL) | yield (%) <sup>b</sup> | 3aa:4aa <sup>c</sup> | er of 3aa(4aa) <sup>d</sup> |
|-------|--------|--------------------|--------|----------|-------|--------|------------------------|----------------------|-----------------------------|
| 1     | (R)-5a | DCE                | 20     | /        | 1:1.2 | 0.5    | 80                     | 18:82                | 53:47(64:36)                |
| 2     | (R)-5b | DCE                | 20     | /        | 1:1.2 | 0.5    | 58                     | 23:77                | 62:38(52:48)                |
| 3     | (R)-5c | DCE                | 20     | /        | 1:1.2 | 0.5    | 82                     | 31:69                | 52:48(50:50)                |
| 4     | (R)-5d | DCE                | 20     | /        | 1:1.2 | 0.5    | 79                     | 31:69                | 51:49(52:48)                |
| 5     | (R)-5e | DCE                | 20     | /        | 1:1.2 | 0.5    | 79                     | 28:72                | 53:47(51:49)                |
| 6     | (R)-5f | DCE                | 20     | /        | 1:1.2 | 0.5    | 32                     | 72:28                | 69:31(56:44)                |
| 7     | (R)-5g | DCE                | 20     | /        | 1:1.2 | 0.5    | 23                     | 47:53                | 52:48(68:32)                |
| 8     | (R)-5f | DCE                | 20     | 5 Å MS   | 1:1.2 | 0.5    | 84                     | 77:23                | 78:22                       |
| 9     | (R)-5f | THF                | 20     | 5 Å MS   | 1:1.2 | 0.5    | N.R.                   | /                    | /                           |
| 10    | (R)-5f | toluene            | 20     | 5 Å MS   | 1:1.2 | 0.5    | 61                     | 40:60                | 84:16(69:31)                |
| 11    | (R)-5f | CH <sub>3</sub> CN | 20     | 5 Å MS   | 1:1.2 | 0.5    | 30                     | 75:25                | 68:32(52:48)                |
| 12    | (R)-5f | EA                 | 20     | 5 Å MS   | 1:1.2 | 0.5    | N.R.                   | /                    | /                           |
| 13    | (R)-5f | acetone            | 20     | 5 Å MS   | 1:1.2 | 0.5    | trace                  | /                    | /                           |
| 14    | (R)-5h | DCE                | 20     | 5 Å MS   | 1:1.2 | 0.5    | 71                     | 38:62                | 53:47(48:52)                |
| 15    | (S)-5i | DCE                | 20     | 5 Å MS   | 1:1.2 | 0.5    | 54                     | 73:27                | 14:86(52:48)                |
| 16    | (R)-5j | DCE                | 20     | 5 Å MS   | 1:1.2 | 0.5    | 75                     | 67:33                | 74:26(52:48)                |
| 17    | (S)-6a | DCE                | 20     | 5 Å MS   | 1:1.2 | 0.5    | 42                     | 63:27                | 42:58(61:39)                |
| 18    | (R)-S4 | DCE                | 20     | 5 Å MS   | 1:1.2 | 0.5    | 17                     | 65:35                | 74:26(48:52)                |
| 19    | (S)-7a | DCE                | 20     | 5 Å MS   | 1:1.2 | 0.5    | 54                     | 89:11                | 84:16                       |
| 20    | (S)-S5 | DCE                | 20     | 5 Å MS   | 1:1.2 | 0.5    | 48                     | 62:38                | 45:55(53:47)                |
| 21    | (S)-S6 | DCE                | 20     | 5 Å MS   | 1:1.2 | 0.5    | 44                     | 79:21                | 26:74                       |
| 22    | (S)-7a | DCM                | 20     | 5 Å MS   | 1:1.2 | 0.5    | 69                     | 74:26                | 76:24(50:50)                |
| 23    | (S)-7a | CHCl <sub>3</sub>  | 20     | 5 Å MS   | 1:1.2 | 0.5    | 15                     | 84:16                | 80:20                       |
| 24    | (S)-7a | CCl <sub>4</sub>   | 20     | 5 Å MS   | 1:1.2 | 0.5    | 23                     | 65:35                | 75:25(42:58)                |

|                   |                 |     |    |                                 |       |      |       |       |       |
|-------------------|-----------------|-----|----|---------------------------------|-------|------|-------|-------|-------|
| 25                | ( <i>S</i> )-7a | DCE | 20 | 3 Å MS                          | 1:1.2 | 0.5  | 36    | 91:9  | 85:15 |
| 26                | ( <i>S</i> )-7a | DCE | 20 | 4 Å MS                          | 1:1.2 | 0.5  | 45    | 91:9  | 86:14 |
| 27                | ( <i>S</i> )-7a | DCE | 20 | Na <sub>2</sub> SO <sub>4</sub> | 1:1.2 | 0.5  | 16    | 89:11 | 84:16 |
| 28                | ( <i>S</i> )-7a | DCE | 20 | MgSO <sub>4</sub>               | 1:1.2 | 0.5  | 24    | 89:11 | 84:16 |
| 29                | ( <i>S</i> )-7a | DCE | 20 | 4 Å MS                          | 1:1.2 | 0.25 | 51    | 91:9  | 85:15 |
| 30                | ( <i>S</i> )-7a | DCE | 20 | 4 Å MS                          | 1:1.2 | 1    | 35    | 92:8  | 86:14 |
| 31                | ( <i>S</i> )-7a | DCE | 20 | 4 Å MS                          | 1:1.2 | 2    | 28    | 92:8  | 87:13 |
| 32                | ( <i>S</i> )-7a | DCE | 0  | 4 Å MS                          | 1:1.2 | 2    | trace | /     | /     |
| 33                | ( <i>S</i> )-7a | DCE | 10 | 4 Å MS                          | 1:1.2 | 2    | 18    | 94:6  | 91:9  |
| 34                | ( <i>S</i> )-7a | DCE | 50 | 4 Å MS                          | 1:1.2 | 2    | 40    | 91:9  | 82:18 |
| 35 <sup>e</sup>   | ( <i>S</i> )-7a | DCE | 0  | 4 Å MS                          | 1:1.2 | 2    | 16    | 95:5  | 92:8  |
| 36 <sup>e</sup>   | ( <i>S</i> )-7a | DCE | 0  | 3 Å MS                          | 1:1.2 | 2    | 17    | 95:5  | 93:7  |
| 37 <sup>e</sup>   | ( <i>S</i> )-7a | DCE | 0  | 5 Å MS                          | 1:1.2 | 2    | 31    | 94:6  | 91:9  |
| 38 <sup>e</sup>   | ( <i>S</i> )-7a | DCE | 0  | 3 Å MS                          | 1:1.5 | 2    | 21    | 95:5  | 92:8  |
| 39 <sup>e</sup>   | ( <i>S</i> )-7a | DCE | 0  | 3 Å MS                          | 1:2   | 2    | 24    | 95:5  | 91:9  |
| 40 <sup>e</sup>   | ( <i>S</i> )-7a | DCE | 0  | 3 Å MS                          | 1.5:1 | 2    | 27    | 95:5  | 92:8  |
| 41 <sup>e</sup>   | ( <i>S</i> )-7a | DCE | 0  | 3 Å MS                          | 2:1   | 2    | 30    | 95:5  | 92:8  |
| 42 <sup>e</sup>   | ( <i>S</i> )-7a | DCE | 0  | 3 Å MS                          | 3:1   | 2    | 38    | 95:5  | 92:8  |
| 43 <sup>e</sup>   | ( <i>S</i> )-7a | DCE | 0  | 3 Å MS                          | 3:1   | 0.5  | 45    | 95:5  | 91:9  |
| 44 <sup>e</sup>   | ( <i>S</i> )-7a | DCE | 0  | 3 Å MS                          | 3:1   | 1    | 43    | 95:5  | 92:8  |
| 45 <sup>e,f</sup> | ( <i>S</i> )-7a | DCE | 0  | 3 Å MS                          | 3:1   | 1    | 35    | 95:5  | 92:8  |
| 46 <sup>e,g</sup> | ( <i>S</i> )-7a | DCE | 0  | 3 Å MS                          | 3:1   | 1    | 52    | 95:5  | 92:8  |

<sup>a</sup>Unless otherwise indicated, the reaction was carried out on a 0.05 mmol scale with additives (50 mg) at T °C in a solvent for 12 h. <sup>b</sup>Isolated yield. <sup>c</sup>The dr value (**3aa**:**4aa**) was determined by <sup>1</sup>H NMR. <sup>d</sup>The er values were determined by HPLC. <sup>e</sup>for 36 h. <sup>f</sup>5 mol% (*S*)-7a <sup>g</sup>20 mol% (*S*)-7a.



**Table S2.** Conditions optimization for the synthesis of **4aa**<sup>a</sup>

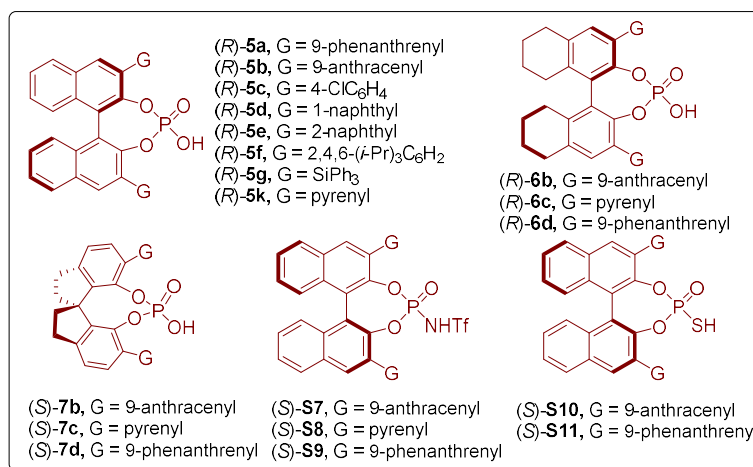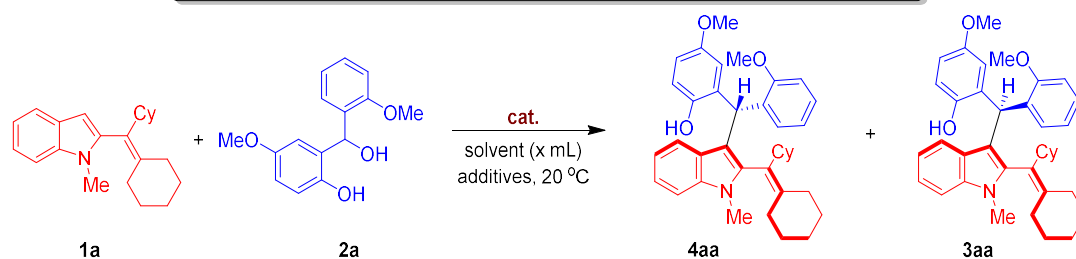

| entry | cat.                    | solvent            | <b>1a:2a</b> | additive | x (mL) | yield (%) <sup>b</sup> | <b>4aa:3aa</b> <sup>c</sup> | er of <b>4aa(3aa)</b> <sup>d</sup> |
|-------|-------------------------|--------------------|--------------|----------|--------|------------------------|-----------------------------|------------------------------------|
| 1     | <i>(R)</i> - <b>5a</b>  | DCE                | 1:1.2        | /        | 0.5    | 80                     | 82:18                       | 64:36(53:47)                       |
| 2     | <i>(R)</i> - <b>5a</b>  | THF                | 1:1.2        | /        | 0.5    | N.R.                   | /                           | /                                  |
| 3     | <i>(R)</i> - <b>5a</b>  | toluene            | 1:1.2        | /        | 0.5    | 47                     | 87:13                       | 78:22                              |
| 4     | <i>(R)</i> - <b>5a</b>  | CH <sub>3</sub> CN | 1:1.2        | /        | 0.5    | 61                     | 53:47                       | 52:48(50:50)                       |
| 5     | <i>(R)</i> - <b>5a</b>  | AcOEt              | 1:1.2        | /        | 0.5    | 10                     | 85:15                       | 72:28                              |
| 6     | <i>(R)</i> - <b>5a</b>  | acetone            | 1:1.2        | /        | 0.5    | 20                     | 79:21                       | 67:33                              |
| 7     | <i>(R)</i> - <b>5k</b>  | toluene            | 1:1.2        | /        | 0.5    | 73                     | 71:29                       | 56:44(83:17)                       |
| 8     | <i>(R)</i> - <b>6b</b>  | toluene            | 1:1.2        | /        | 0.5    | 37                     | 89:11                       | 77:23                              |
| 9     | <i>(R)</i> - <b>6c</b>  | toluene            | 1:1.2        | /        | 0.5    | 70                     | 70:30                       | 54:46(86:14)                       |
| 10    | <i>(R)</i> - <b>6d</b>  | toluene            | 1:1.2        | /        | 0.5    | 71                     | 84:16                       | 70:30                              |
| 11    | <i>(S)</i> - <b>7b</b>  | toluene            | 1:1.2        | /        | 0.5    | 47                     | 90:10                       | 84:16                              |
| 12    | <i>(R)</i> - <b>7c</b>  | toluene            | 1:1.2        | /        | 0.5    | 45                     | 89:11                       | 19:81                              |
| 13    | <i>(S)</i> - <b>7d</b>  | toluene            | 1:1.2        | /        | 0.5    | 12                     | 90:10                       | 75:25                              |
| 14    | <i>(S)</i> - <b>S7</b>  | toluene            | 1:1.2        | /        | 0.5    | 54                     | 84:16                       | 47:53                              |
| 15    | <i>(S)</i> - <b>S8</b>  | toluene            | 1:1.2        | /        | 0.5    | 54                     | 75:25                       | 29:61                              |
| 16    | <i>(S)</i> - <b>S9</b>  | toluene            | 1:1.2        | /        | 0.5    | 57                     | 60:40                       | 46:54(56:44)                       |
| 17    | <i>(S)</i> - <b>S10</b> | toluene            | 1:1.2        | /        | 0.5    | 51                     | 89:11                       | 35:65                              |
| 18    | <i>(S)</i> - <b>S11</b> | toluene            | 1:1.2        | /        | 0.5    | 35                     | 88:12                       | 27:73                              |
| 19    | <i>(S)</i> - <b>7b</b>  | <i>o</i> -xylene   | 1:1.2        | /        | 0.5    | 40                     | 89:11                       | 81:19                              |
| 20    | <i>(S)</i> - <b>7b</b>  | <i>m</i> -xylene   | 1:1.2        | /        | 0.5    | 48                     | 88:12                       | 81:19                              |
| 21    | <i>(S)</i> - <b>7b</b>  | <i>p</i> -xylene   | 1:1.2        | /        | 0.5    | 44                     | 89:11                       | 88:12                              |
| 22    | <i>(S)</i> - <b>7b</b>  | PhF                | 1:1.2        | /        | 0.5    | 61                     | 90:10                       | 72:28                              |
| 23    | <i>(S)</i> - <b>7b</b>  | PhCl               | 1:1.2        | /        | 0.5    | 64                     | 91:9                        | 77:23                              |
| 24    | <i>(S)</i> - <b>7b</b>  | PhBr               | 1:1.2        | /        | 0.5    | 49                     | 91:9                        | 75:25                              |
| 25    | <i>(S)</i> - <b>7b</b>  | mesitylene         | 1:1.2        | /        | 0.5    | 25                     | 87:13                       | 87:13                              |
| 26    | <i>(S)</i> - <b>7b</b>  | PhCF <sub>3</sub>  | 1:1.2        | /        | 0.5    | 76                     | 91:9                        | 74:26                              |

|                 |                         |                  |       |                                 |      |    |       |       |
|-----------------|-------------------------|------------------|-------|---------------------------------|------|----|-------|-------|
| 27              | ( <i>S</i> )- <b>7b</b> | <i>p</i> -xylene | 1:2   | /                               | 0.5  | 45 | 89:11 | 87:13 |
| 28              | ( <i>S</i> )- <b>7b</b> | <i>p</i> -xylene | 1:3   | /                               | 0.5  | 49 | 89:11 | 88:12 |
| 29              | ( <i>S</i> )- <b>7b</b> | <i>p</i> -xylene | 1.2:1 | /                               | 0.5  | 37 | 89:11 | 87:13 |
| 30              | ( <i>S</i> )- <b>7b</b> | <i>p</i> -xylene | 2:1   | /                               | 0.5  | 52 | 89:11 | 88:12 |
| 31              | ( <i>S</i> )- <b>7b</b> | <i>p</i> -xylene | 2:1   | 3 Å MS                          | 0.5  | 99 | 90:10 | 89:11 |
| 32              | ( <i>S</i> )- <b>7b</b> | <i>p</i> -xylene | 2:1   | 4 Å MS                          | 0.5  | 99 | 90:10 | 90:10 |
| 33              | ( <i>S</i> )- <b>7b</b> | <i>p</i> -xylene | 2:1   | 5 Å MS                          | 0.5  | 99 | 90:10 | 89:11 |
| 34              | ( <i>S</i> )- <b>7b</b> | <i>p</i> -xylene | 2:1   | Na <sub>2</sub> SO <sub>4</sub> | 0.5  | 40 | 89:11 | 88:16 |
| 35              | ( <i>S</i> )- <b>7b</b> | <i>p</i> -xylene | 2:1   | MgSO <sub>4</sub>               | 0.5  | 55 | 89:11 | 89:11 |
| 36              | ( <i>S</i> )- <b>7b</b> | <i>p</i> -xylene | 2:1   | 4 Å MS                          | 0.25 | 99 | 90:10 | 89:11 |
| 37              | ( <i>S</i> )- <b>7b</b> | <i>p</i> -xylene | 2:1   | 4 Å MS                          | 1    | 99 | 91:9  | 91:9  |
| 38              | ( <i>S</i> )- <b>7b</b> | <i>p</i> -xylene | 2:1   | 4 Å MS                          | 2    | 99 | 92:8  | 93:7  |
| 39              | ( <i>S</i> )- <b>7b</b> | <i>p</i> -xylene | 2:1   | 4 Å MS                          | 3    | 83 | 92:8  | 92:8  |
| 40              | ( <i>S</i> )- <b>7b</b> | <i>p</i> -xylene | 2:1   | 4 Å MS                          | 4    | 59 | 92:8  | 92:8  |
| 41 <sup>e</sup> | ( <i>S</i> )- <b>7b</b> | <i>p</i> -xylene | 2:1   | 4 Å MS                          | 2    | 87 | 92:8  | 92:8  |
| 42 <sup>f</sup> | ( <i>S</i> )- <b>7b</b> | <i>p</i> -xylene | 2:1   | 4 Å MS                          | 2    | 99 | 92:8  | 93:7  |

<sup>a</sup>Unless otherwise indicated, the reaction was carried out on a 0.05 mmol scale with additives (50 mg) at 20 °C in a solvent for 12 h. <sup>b</sup>Isolated yield. <sup>c</sup>The dr value (**4aa:3aa**) was determined by <sup>1</sup>H NMR. <sup>d</sup>The er values were determined by HPLC. <sup>e</sup>5 mol% (*S*)-**7b**. <sup>f</sup>20 mol% (*S*)-**7b**.

#### 4. Conditions optimization for the synthesis of 3fa-3ga and 4fa-4ga

In order to improve the enantioselectivity and diastereoselective of products **3fa**, we re-optimized some reaction conditions (**Table S3**). In detail, to improve the stereoselectivity of **3fa**, chiral phosphoric acids (CPAs) **5-7** were re-evaluated (entries 1-4) and it was discovered CPA (*S*)-**5i** could catalyze the reaction to give product **3fa** in a higher enantioselectivity and diastereoselectivity than CPA (*S*)-**7a** (entry 3 vs entry 1). Then, we modulated the volume of solvent and discovered the enantioselectivity could not be significantly improved (entries 5-6). Therefore, 1 mL DCE was still the best solvent volume for this reaction, which was chosen as the optimal reaction conditions for the synthesis of product **3fa** (entry 3).

**Table S3.** Conditions re-optimization for the synthesis of **3fa**<sup>a</sup>

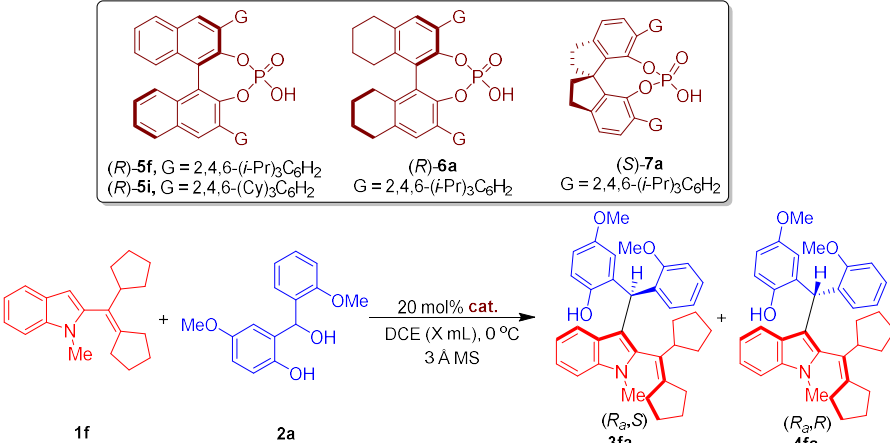

| entry | cat.                    | X   | yield (%) <sup>b</sup> | <b>3fa:4fa</b> <sup>c</sup> | er of <b>3fa</b> <sup>d</sup> |
|-------|-------------------------|-----|------------------------|-----------------------------|-------------------------------|
| 1     | ( <i>S</i> )- <b>7a</b> | 1   | 47                     | 78:22                       | 85:15                         |
| 2     | ( <i>R</i> )- <b>5f</b> | 1   | 54                     | 81:19                       | 76:24                         |
| 3     | ( <i>S</i> )- <b>5i</b> | 1   | 46                     | 85:15                       | 10:90                         |
| 4     | ( <i>R</i> )- <b>6a</b> | 1   | 39                     | 77:23                       | 55:45                         |
| 5     | ( <i>S</i> )- <b>5i</b> | 0.5 | 49                     | 83:17                       | 11:89                         |
| 6     | ( <i>S</i> )- <b>5i</b> | 2   | 33                     | 85:15                       | 10:90                         |

<sup>a</sup>Unless otherwise indicated, the reaction was carried out on a 0.05 mmol scale with 3 Å MS (50 mg) at 0 °C in DCE for 36 h. <sup>b</sup>Isolated yield. <sup>c</sup>The dr value (**3fa:4fa**) was determined by <sup>1</sup>H NMR. <sup>d</sup>The er values were determined by HPLC.

In addition, we have re-optimized the reaction conditions for the synthesis of product **4fa** (**Table 2**). To improve the stereoselectivity of **4fa**, we re-evaluated CPAs **5-7** (entries 2-9) and discovered CPA (*R*)-**6b** could catalyze the reaction to give product **4fa** in a higher enantioselectivity than CPA (*R*)-**7b** (entry 5 vs entry 1). Then, different solvents were evaluated under the catalysis of (*R*)-**6b** (entries 10-12), and it was discovered that *p*-xylene was still the best solvent, which was chosen as the optimal reaction conditions for the synthesis of product **4fa** (entry 5).

**Table S4.** Conditions re-optimization for the synthesis of **4fa**<sup>a</sup>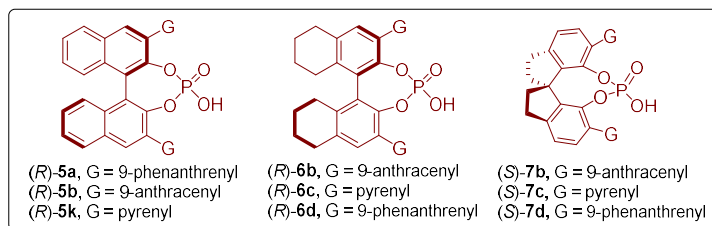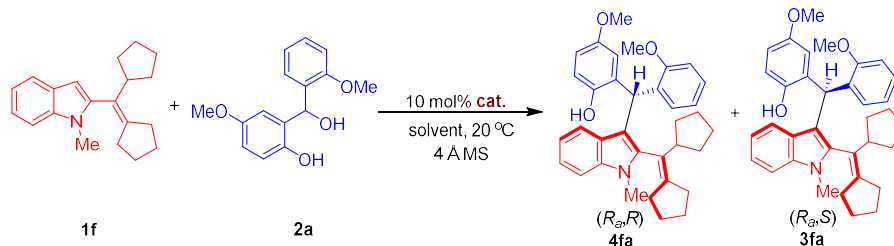

| entry | cat.                    | solvent          | yield (%) <sup>b</sup> | <b>4fa:3fa</b> <sup>c</sup> | er of <b>4fa</b> <sup>d</sup> |
|-------|-------------------------|------------------|------------------------|-----------------------------|-------------------------------|
| 1     | ( <i>S</i> )- <b>7b</b> | <i>p</i> -xylene | 62                     | 60:40                       | 73:27                         |
| 2     | ( <i>R</i> )- <b>5a</b> | <i>p</i> -xylene | 52                     | 67:33                       | 85:15                         |
| 3     | ( <i>R</i> )- <b>5b</b> | <i>p</i> -xylene | 59                     | 55:45                       | 80:20                         |
| 4     | ( <i>R</i> )- <b>5k</b> | <i>p</i> -xylene | 66                     | 33:67                       | 60:40                         |
| 5     | ( <i>R</i> )- <b>6b</b> | <i>p</i> -xylene | 60                     | 75:25                       | 85:15                         |
| 6     | ( <i>R</i> )- <b>6c</b> | <i>p</i> -xylene | 35                     | 54:46                       | 82:18                         |
| 7     | ( <i>R</i> )- <b>6d</b> | <i>p</i> -xylene | 76                     | 42:58                       | 72:28                         |
| 8     | ( <i>S</i> )- <b>7c</b> | <i>p</i> -xylene | trace                  | /                           | /                             |
| 9     | ( <i>S</i> )- <b>7d</b> | <i>p</i> -xylene | 30                     | 51:49                       | 80:20                         |
| 10    | ( <i>R</i> )- <b>6b</b> | <i>o</i> -xylene | 49                     | 75:25                       | 83:17                         |
| 11    | ( <i>R</i> )- <b>6b</b> | <i>m</i> -xylene | 42                     | 75:25                       | 84:16                         |
| 12    | ( <i>R</i> )- <b>6b</b> | mesitylene       | 53                     | 75:25                       | 84:16                         |

<sup>a</sup>Unless otherwise indicated, the reaction was carried out on a 0.05 mmol scale with 4 Å MS (50 mg) at 20 °C in a solvent (2 mL) for 12 h. <sup>b</sup>Isolated yield. <sup>c</sup>The dr value (**4fa:3fa**) was determined by <sup>1</sup>H NMR. <sup>d</sup>The er values were determined by HPLC.

As shown in **Table S5**, to improve the stereoselectivity of product **3ga**, the increasing of solvent volume (entries 2-3) discovered that using 2 mL of DCE could slightly increase the enantioselectivity to 86:14 er but with a low yield of 39% (entry 2 vs entry 1). Then, we re-evaluated CPAs **5-7** with 1 mL of DCE (entries 4-6) and discovered CPA (*S*)-**5i** could catalyze the reaction in a higher diastereoselectivity than CPA (*S*)-**7a** (entry 5 vs entry 1). Finally, increasing the solvent volume to 2 mL led to a further increased enantioselectivity of 14:86 er with an acceptable yield of 44% and a good diastereoselectivity of 86:14 dr (entry 7), which was chosen as the optimal reaction conditions for the synthesis of product **3ga**.

**Table S5.** Conditions re-optimization for the synthesis of **3ga**<sup>a</sup>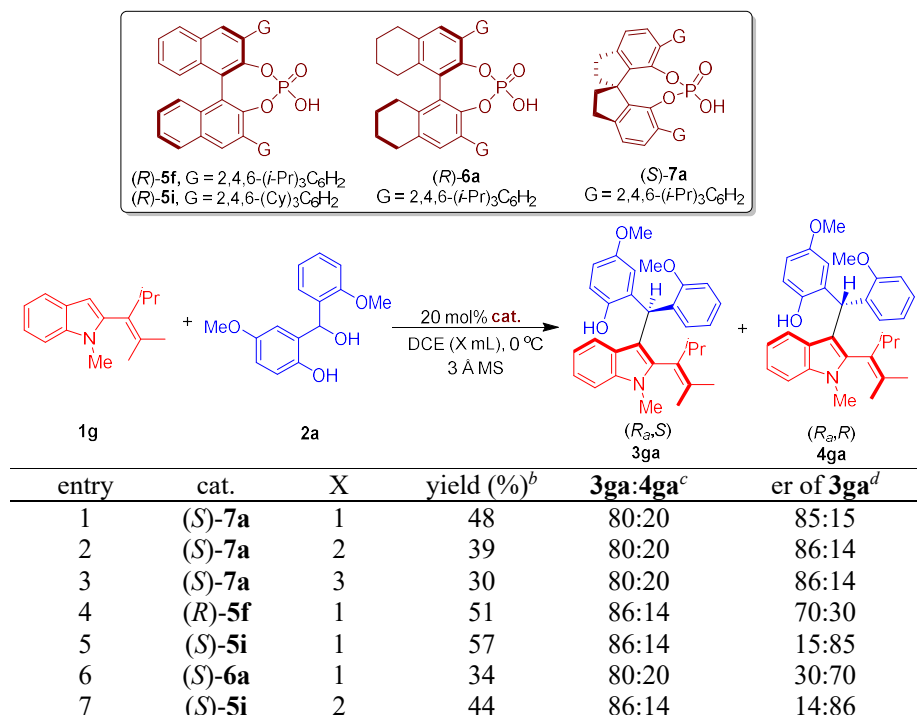

<sup>a</sup>Unless otherwise indicated, the reaction was carried out on a 0.05 mmol scale with 3 Å MS (50 mg) at 0 °C in DCE for 36 h. <sup>b</sup>Isolated yield. <sup>c</sup>The dr value (**3ga:4ga**) was determined by <sup>1</sup>H NMR. <sup>d</sup>The er values were determined by HPLC.

To improve the enantioselectivity of product **4ga** (Table S6), at first, we adjusted the solvent volume, and it was discovered that the enantioselectivity has no significant improvement (entries 1-3). To further increase the enantioselectivity, we re-evaluated CPAs **5-7** (entries 4-11) and discovered CPA (*R*)-**6b** could catalyze the reaction in a higher enantioselectivity than CPA (*R*)-**7b** (entry 7 vs entry 1). Then, different solvents were evaluated under the catalysis of (*R*)-**6b** (entries 12-20), and it was discovered the reaction had similar enantioselectivity when mesitylene was used as the solvent (entry 20 vs entry 7). Because of the lower freezing point, mesitylene was more suitable solvent for modulating reaction temperatures than *p*-xylene. So, the reaction temperature was altered in mesitylene (entries 21-22), which revealed that lowering the reaction temperature to 0 °C could improve the enantioselectivity of **4ga** to 92:8 er albeit with a low yield of 42% (entry 21). Next, modulating the reagent ratio of **1g:2a** to 3:1 could slightly increase the yield to 44% (entry 23). To further increase the yield, we screened the additives and it was discovered 4 Å MS was still the best additive for this reaction (entry 21 vs entries 24-25). Finally, the increasing of the catalyst loading discovered that using 20 mol% of (*R*)-**6b** could improve the yield to 53% with a retained enantioselectivity of 92:8 er (entry 26), which was chosen as the optimal reaction conditions for the synthesis of product **4ga**.

**Table S6.** Conditions optimization for the synthesis of **4ga**<sup>a</sup>

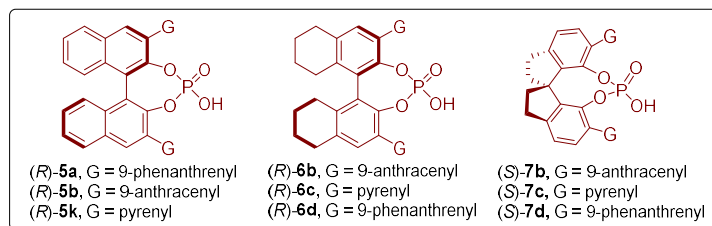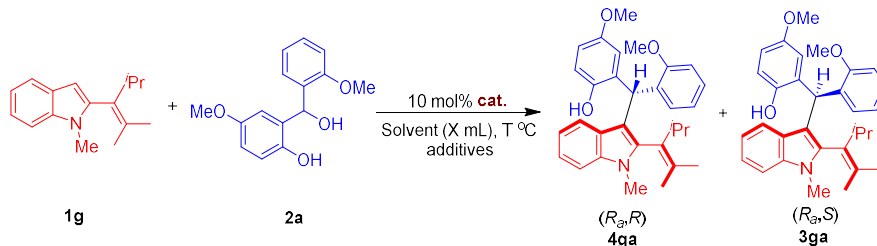

| entry            | cat.                    | solvent            | additive | T (°C) | <b>1g:2a</b> | X | yield (%) <sup>b</sup> | <b>4ga:3ga</b> <sup>c</sup> | er of <b>4ga</b> <sup>d</sup> |
|------------------|-------------------------|--------------------|----------|--------|--------------|---|------------------------|-----------------------------|-------------------------------|
| 1                | ( <i>S</i> )- <b>7b</b> | <i>p</i> -xylene   | 4 Å MS   | 20     | 2:1          | 1 | 83                     | >95:5                       | 78:22                         |
| 2                | ( <i>S</i> )- <b>7b</b> | <i>p</i> -xylene   | 4 Å MS   | 20     | 2:1          | 2 | 69                     | >95:5                       | 79:21                         |
| 3                | ( <i>S</i> )- <b>7b</b> | <i>p</i> -xylene   | 4 Å MS   | 20     | 2:1          | 3 | 60                     | >95:5                       | 79:21                         |
| 4                | ( <i>R</i> )- <b>5a</b> | <i>p</i> -xylene   | 4 Å MS   | 20     | 2:1          | 2 | 90                     | 90:10                       | 67:33                         |
| 5                | ( <i>R</i> )- <b>5b</b> | <i>p</i> -xylene   | 4 Å MS   | 20     | 2:1          | 2 | 82                     | >95:5                       | 84:16                         |
| 6                | ( <i>R</i> )- <b>5k</b> | <i>p</i> -xylene   | 4 Å MS   | 20     | 2:1          | 2 | 93                     | 80:20                       | 68:32                         |
| 7                | ( <i>R</i> )- <b>6b</b> | <i>p</i> -xylene   | 4 Å MS   | 20     | 2:1          | 2 | 60                     | >95:5                       | 86:14                         |
| 8                | ( <i>R</i> )- <b>6c</b> | <i>p</i> -xylene   | 4 Å MS   | 20     | 2:1          | 2 | 69                     | 91:9                        | 74:26                         |
| 9                | ( <i>R</i> )- <b>6d</b> | <i>p</i> -xylene   | 4 Å MS   | 20     | 2:1          | 2 | 99                     | 75:25                       | 81:19                         |
| 10               | ( <i>S</i> )- <b>7c</b> | <i>p</i> -xylene   | 4 Å MS   | 20     | 2:1          | 2 | 57                     | 94:6                        | 79:21                         |
| 11               | ( <i>S</i> )- <b>7d</b> | <i>p</i> -xylene   | 4 Å MS   | 20     | 2:1          | 2 | 60                     | 92:8                        | 80:20                         |
| 12               | ( <i>R</i> )- <b>6b</b> | DCE                | 4 Å MS   | 20     | 2:1          | 2 | 30                     | 75:25                       | 82:28                         |
| 13               | ( <i>R</i> )- <b>6b</b> | THF                | 4 Å MS   | 20     | 2:1          | 2 | NR                     | /                           | /                             |
| 14               | ( <i>R</i> )- <b>6b</b> | toluene            | 4 Å MS   | 20     | 2:1          | 2 | 27                     | 80:20                       | 85:15                         |
| 15               | ( <i>R</i> )- <b>6b</b> | CH <sub>3</sub> CN | 4 Å MS   | 20     | 2:1          | 2 | NR                     | /                           | /                             |
| 16               | ( <i>R</i> )- <b>6b</b> | AcOEt              | 4 Å MS   | 20     | 2:1          | 2 | NR                     | /                           | /                             |
| 17               | ( <i>R</i> )- <b>6b</b> | acetone            | 4 Å MS   | 20     | 2:1          | 2 | NR                     | /                           | /                             |
| 18               | ( <i>R</i> )- <b>6b</b> | <i>o</i> -xylene   | 4 Å MS   | 20     | 2:1          | 2 | trace                  | /                           | /                             |
| 19               | ( <i>R</i> )- <b>6b</b> | <i>m</i> -xylene   | 4 Å MS   | 20     | 2:1          | 2 | 45                     | >95:5                       | 85:15                         |
| 20               | ( <i>R</i> )- <b>6b</b> | mesitylene         | 4 Å MS   | 20     | 2:1          | 2 | 56                     | >95:5                       | 86:14                         |
| 21 <sup>e</sup>  | ( <i>R</i> )- <b>6b</b> | mesitylene         | 4 Å MS   | 0      | 2:1          | 2 | 42                     | >95:5                       | 92:8                          |
| 22 <sup>e</sup>  | ( <i>R</i> )- <b>6b</b> | mesitylene         | 4 Å MS   | -10    | 2:1          | 2 | 27                     | >95:5                       | 93:7                          |
| 23 <sup>e</sup>  | ( <i>R</i> )- <b>6b</b> | mesitylene         | 4 Å MS   | 0      | 3:1          | 2 | 44                     | >95:5                       | 92:8                          |
| 24 <sup>e</sup>  | ( <i>R</i> )- <b>6b</b> | mesitylene         | 3 Å MS   | 0      | 3:1          | 2 | 40                     | >95:5                       | 91:9                          |
| 25 <sup>e</sup>  | ( <i>R</i> )- <b>6b</b> | mesitylene         | 5 Å MS   | 0      | 3:1          | 2 | 45                     | >95:5                       | 91:9                          |
| 26 <sup>ef</sup> | ( <i>R</i> )- <b>6b</b> | mesitylene         | 4 Å MS   | 0      | 3:1          | 2 | 53                     | >95:5                       | 92:8                          |

<sup>a</sup>Unless otherwise indicated, the reaction was carried out on a 0.05 mmol scale with additives (50 mg) at 20 °C in a solvent for 12 h. <sup>b</sup>Isolated yield. <sup>c</sup>The dr value (**4ga:3ga**) was determined by <sup>1</sup>H NMR. <sup>d</sup>The er values were determined by HPLC. <sup>e</sup>for 24 h. <sup>f</sup>20 mol%.

## 5. General procedure for the synthesis of products 3 and 4

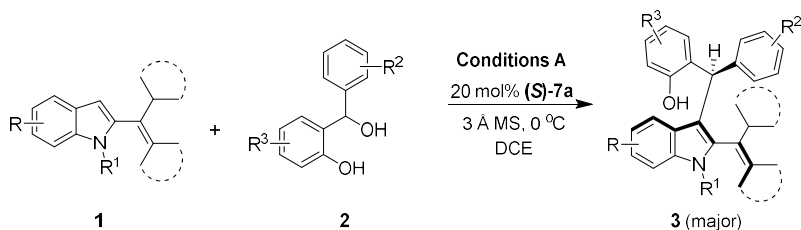

2-Alkenylindoles **1** (0.3 mmol), *o*-hydroxybenzyl alcohols **2** (0.1 mmol), CPA (*S*)-**7a** (0.02 mmol) and 3 Å MS (100 mg) were added to a reaction tube. Then, DCE (2 mL) was added to the reaction mixture, which was stirred at 0 °C for 36 h. After the completion of the reaction indicated by TLC, the reaction mixture was purified through preparative thin layer chromatography on silica gel to afford pure products **3**.

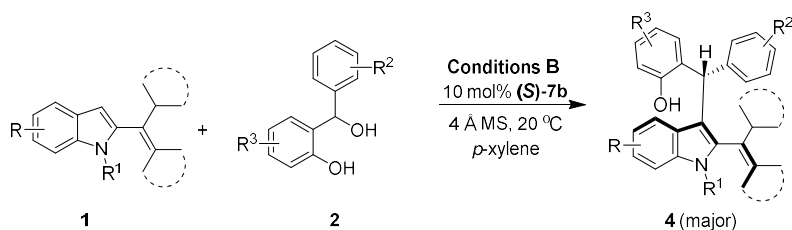

2-Alkenylindoles **1** (0.2 mmol), *o*-hydroxybenzyl alcohols **2** (0.1 mmol), CPA (*S*)-**7b** (0.01 mmol) and 4 Å MS (100 mg) were added to a reaction tube. Then, *p*-xylene (4 mL) was added to the reaction mixture, which was stirred at 20 °C for 12 h. After the completion of the reaction indicated by TLC, the reaction mixture was purified through flash column chromatography on silica gel to afford pure products **4**.

## 6. Synthetic procedure and characterization data of products 3 and 4

### (*R<sub>a</sub>,S*)-2-((2-(cyclohexyl(cyclohexylidene)methyl)-1-methyl-1H-indol-3-yl)(2-methoxyphenyl) methyl)-4-methoxyphenol (**3aa**):

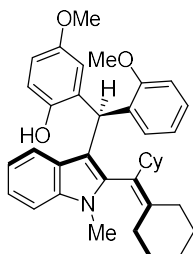

Following the general procedure, 2-alkenylindoles **1a** (92.3 mg, 0.3 mmol), *o*-hydroxybenzyl alcohol **2a** (26.0 mg, 0.1 mmol), CPA (*S*)-**7a** (14.4 mg, 0.02 mmol) and 3 Å MS (100 mg) were added to a reaction tube. Then, DCE (2 mL) was added to the reaction mixture, which was stirred at 0 °C for 36 h. After the completion of the reaction indicated by TLC, the reaction mixture was purified through preparative thin layer chromatography on silica gel (petroleum ether/ethyl acetate = 5:1) to afford pure product **3aa** in 52% yield (28.6 mg) as a white solid; 95:5 dr; m.p. 99-100 °C;  $[\alpha]_D^{20} = +91.9$  (c 0.36, acetone); <sup>1</sup>H NMR (400 MHz, CDCl<sub>3</sub>) δ 7.28 – 7.26 (m, 1H), 7.17 – 7.09 (m, 2H), 7.06 – 7.04 (m, 1H), 6.92 – 6.82 (m, 3H), 6.77 – 6.67 (m, 3H), 6.35 (s, 1H), 6.12 (s, 1H), 5.16 (s, 1H), 3.73 (s, 3H), 3.64 (s, 3H), 3.55 (s, 3H), 2.75 – 2.62 (m, 1H), 2.48 – 2.34 (m, 1H), 2.13 – 2.03 (m, 1H), 1.95 – 1.87 (m, 1H), 1.82 – 1.67 (m, 4H), 1.64 – 1.59 (m, 1H), 1.52 – 1.45 (m, 2H), 1.34 – 1.23 (m, 3H), 1.18 – 1.07 (m, 2H), 1.06 – 0.81 (m, 3H), 0.68 – 0.51 (m, 2H); <sup>13</sup>C NMR (100 MHz, CDCl<sub>3</sub>) δ 156.7, 153.4, 149.5, 145.0, 141.2, 136.9, 131.2, 131.1, 127.9, 127.5, 125.7, 121.0, 120.8, 120.0, 119.6, 116.5, 115.9, 111.7, 110.4, 110.0, 109.3, 67.1, 55.6, 41.7, 36.8, 33.6, 32.4, 31.2, 30.8, 30.4, 28.1, 27.3, 27.0, 26.9, 26.5, 25.9; IR (KBr): 3433, 2926, 2850, 1667, 1585, 1489, 1464, 1242, 1047, 740; ESI FTMS exact mass calcd for (C<sub>37</sub>H<sub>43</sub>NO<sub>3</sub>+H)<sup>+</sup> requires m/z 550.3315, found m/z 550.3344; The enantiomeric ratio: 92:8, determined by HPLC (Daicel Chiralpak AD-3, hexane/ isopropanol = 98/ 2, flow rate 0.8 mL/min, T = 30 °C, 254 nm): t<sub>R</sub> = 9.883 (major), t<sub>R</sub> = 15.576 (minor).

### (*R<sub>a</sub>,S*)-4-(tert-butyl)-2-((2-(cyclohexyl(cyclohexylidene)methyl)-1-methyl-1H-indol-3-yl)(2-methoxyphenyl)methyl)phenol (**3ab**):

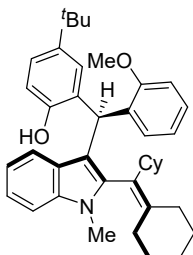

Following the general procedure, 2-alkenylindoles **1a** (92.3 mg, 0.3 mmol), *o*-hydroxybenzyl alcohol **2b** (28.6 mg, 0.1 mmol), CPA (*S*)-**7a** (14.4 mg, 0.02 mmol) and 3 Å MS (100 mg) were added to a reaction tube. Then, DCE (4 mL) was added to the reaction mixture, which was stirred at 0 °C for 36 h. After the completion of the reaction indicated by TLC, the reaction mixture was purified through preparative thin layer chromatography on silica gel (petroleum ether/ethyl acetate = 5:1) to afford pure product **3ab** in 59% yield (34.0 mg) as colorless oil; 95:5 dr;  $[\alpha]_D^{20} = +42.4$  (c 0.33, acetone); <sup>1</sup>H NMR (400 MHz, CDCl<sub>3</sub>) δ 7.28 (s, 1H), 7.19 – 7.09 (m, 3H), 7.07 (d, *J* = 7.6 Hz, 1H), 6.90 – 6.81 (m, 3H), 6.81 – 6.75 (m, 2H), 6.74 – 6.70 (m, 1H), 6.10 (s, 1H), 5.38 (s, 1H), 3.71 (s, 3H), 3.56 (s, 3H), 2.74 – 2.61 (m, 1H), 2.47 – 2.36 (m, 1H), 2.19 – 2.09 (m, 1H), 1.89 – 1.81 (m, 1H), 1.72 – 1.48 (m, 9H), 1.44 – 1.38 (m, 1H), 1.26 – 1.23 (m, 2H), 1.15 (s, 9H), 1.11 – 1.04 (m, 1H), 1.00 – 0.91 (m, 2H), 0.87 – 0.78 (m, 1H), 0.71 – 0.58 (m, 1H); <sup>13</sup>C NMR (100 MHz, CDCl<sub>3</sub>) δ 156.9, 153.0, 144.8, 142.6, 140.9, 136.9, 131.4, 131.0, 128.8, 128.0, 127.4, 126.5, 125.9, 124.2, 120.9, 120.7,



120.0, 119.5, 115.4, 110.3, 109.2, 41.6, 37.2, 34.1, 33.5, 32.5, 31.5, 31.2, 30.7, 30.5, 28.1, 27.2, 27.1, 26.9, 26.6, 25.9; IR (KBr): 3421, 2927, 2851, 1594, 1489, 1383, 1351, 1243, 1121, 741; ESI FTMS exact mass calcd for (C<sub>40</sub>H<sub>49</sub>NO<sub>2</sub>-H)<sup>-</sup> requires m/z 574.3690, found m/z 574.3689; The enantiomeric ratio: 92:8, determined by HPLC (Daicel Chiralpak ID, hexane/ isopropanol = 98/ 2, flow rate 1.0 mL/min, T = 30 °C, 254 nm): t<sub>R</sub> = 4.679 (major), t<sub>R</sub> = 6.253 (minor).

**(*R,S*)-2-((2-(cyclohexyl(cyclohexylidene)methyl)-1-methyl-1H-indol-3-yl)(phenyl)methyl)-4-methylphenol (3ac):**

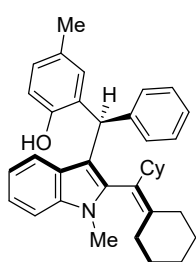

Following the general procedure, 2-alkenylindoles **1a** (92.3 mg, 0.3 mmol), *o*-hydroxybenzyl alcohol **2c** (21.4 mg, 0.1 mmol), CPA (*S*)-**7a** (7.2 mg, 0.02 mmol) and 3 Å MS (100 mg) were added to a reaction tube. Then, DCE (2 mL) was added to the reaction mixture, which was stirred at 0 °C for 36 h. After the completion of the reaction indicated by TLC, the reaction mixture was purified through preparative thin layer chromatography on silica gel (petroleum ether/ethyl acetate = 5:1) to afford pure product **3ac** in 70% yield (35.3 mg) as colorless oil; 83:17 dr; [α]<sub>D</sub><sup>20</sup> = -97.3 (c 0.22, acetone); <sup>1</sup>H NMR (400 MHz, CDCl<sub>3</sub>) δ 7.31 – 7.27 (m, 1H), 7.24 – 7.19 (m, 2H), 7.18 – 7.09 (m, 4H), 6.99 – 6.92 (m, 2H), 6.89 – 6.82 (m, 1H), 6.79 (s, 1H), 6.74 (d, *J* = 8.0 Hz, 1H), 5.56 (s, 1H), 4.79 (s, 1H), 3.58 (s, 3H), 2.64 – 2.55 (m, 1H), 2.50 – 2.42 (m, 1H), 2.31 – 2.23 (m, 1H), 2.13 (s, 3H), 1.67 – 1.58 (m, 4H), 1.51 – 1.39 (m, 6H), 1.31 – 1.22 (m, 4H), 1.12 – 1.01 (m, 2H), 0.83 – 0.76 (m, 1H), 0.66 – 0.56 (m, 1H); <sup>13</sup>C NMR (100 MHz, CDCl<sub>3</sub>) δ 151.9, 144.3, 142.9, 140.0, 136.9, 131.0, 129.7, 129.6, 129.1, 128.4, 128.3, 127.6, 126.7, 126.3, 120.7, 120.4, 119.2, 115.8, 111.6, 109.2, 43.9, 41.1, 33.0, 32.8, 30.7, 30.6, 30.4, 28.2, 27.8, 26.9, 26.7, 25.7, 20.9. IR (KBr): 3446, 2926, 2853, 1732, 1632, 1601, 1362, 1262, 1122, 741; ESI FTMS exact mass calcd for (C<sub>36</sub>H<sub>41</sub>NO+H)<sup>+</sup> requires m/z 504.3261, found m/z 504.3247; The enantiomeric ratio: 90:10, determined by HPLC (Daicel Chiralpak AD-3, hexane/ isopropanol = 98/ 2, flow rate 1.0 mL/min, T = 30 °C, 254 nm): t<sub>R</sub> = 6.786 (major), t<sub>R</sub> = 12.833 (minor).

**(*R,S*)-2-((2-(cyclohexyl(cyclohexylidene)methyl)-1-methyl-1H-indol-3-yl)(2-methoxyphenyl) methyl)-5-methoxyphenol (3ad):**

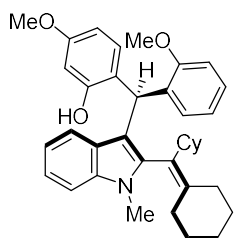

Following the general procedure, 2-alkenylindoles **1a** (92.3 mg, 0.3 mmol), *o*-hydroxybenzyl alcohol **2d** (26.0 mg, 0.1 mmol), CPA (*S*)-**7a** (14.4 mg, 0.02 mmol) and 3 Å MS (100 mg) were added to a reaction tube. Then, DCE (2 mL) was added to the reaction mixture, which was stirred at 0 °C for 36 h. After the completion of the reaction indicated by TLC, the reaction mixture was purified through preparative thin layer chromatography on silica gel (petroleum ether/ethyl acetate = 5:1) to afford pure product **3ad** in 88% yield (48.5 mg) as colorless oil; 90:10 dr; [α]<sub>D</sub><sup>20</sup> = +74.7 (c 0.94, acetone); <sup>1</sup>H NMR (400 MHz, CDCl<sub>3</sub>) δ 7.31 – 7.27 (m, 1H), 7.18 – 7.13 (m, 2H), 7.07 (d, *J* = 7.7 Hz, 1H), 6.96 – 6.85 (m, 3H), 6.78 – 6.72 (m, 1H), 6.60 (d, *J* = 8.4 Hz, 1H), 6.44 – 6.37 (m, 2H), 6.08 (s, 1H), 5.65 (s, 1H), 3.76 (s, 3H), 3.74 (s, 3H), 3.56

(s, 3H), 2.76 – 2.65 (m, 1H), 2.46 – 2.37 (m, 1H), 2.15 – 2.06 (m, 1H), 1.96 – 1.88 (m, 1H), 1.80 – 1.67 (m, 4H), 1.66 – 1.58 (m, 2H), 1.52 – 1.46 (m, 2H), 1.36 – 1.25 (m, 3H), 1.18 – 1.08 (m, 2H), 1.04 – 0.97 (m, 1H), 0.91 – 0.85 (m, 1H), 0.73 – 0.63 (m, 1H), 0.60 – 0.51 (m, 1H);  $^{13}\text{C}$  NMR (100 MHz,  $\text{CDCl}_3$ )  $\delta$  159.5, 156.7, 156.2, 145.0, 141.1, 137.0, 131.7, 131.1, 129.5, 128.1, 127.3, 125.7, 122.0, 121.0, 120.8, 120.1, 119.6, 110.4, 110.3, 109.3, 105.9, 101.9, 55.7, 55.3, 41.6, 36.0, 33.7, 32.4, 31.3, 30.8, 30.4, 28.1, 27.3, 27.0, 26.9, 26.5, 25.9; IR (KBr): 2927, 2851, 1582, 1504, 1464, 1364, 1242, 1033, 741; ESI FTMS exact mass calcd for  $(\text{C}_{37}\text{H}_{43}\text{NO}_3\text{-H})^-$  requires  $m/z$  548.3170, found  $m/z$  548.3198; The enantiomeric ratio: 90:10, determined by HPLC (Daicel Chiralpak AD-3, hexane/ isopropanol = 98/ 2, flow rate 0.8 mL/min, T = 30 °C, 254 nm):  $t_R$  = 11.769 (major),  $t_R$  = 22.193 (minor).

**(*R,S*)-2-((2-(cyclohexyl(cyclohexylidene)methyl)-1-methyl-1H-indol-3-yl)(2-methoxyphenyl)**

**methyl)phenol (3ae):**

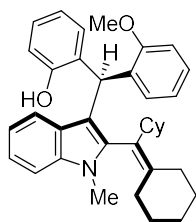

Following the general procedure, 2-alkenylindoles **1a** (92.3 mg, 0.3 mmol), *o*-hydroxybenzyl alcohol **2e** (23.0 mg, 0.1 mmol), CPA (*S*)-**7a** (14.4 mg, 0.02 mmol) and 3 Å MS (100 mg) were added to a reaction tube. Then, DCE (2 mL) was added to the reaction mixture, which was stirred at 0 °C for 36 h. After the completion of the reaction indicated by TLC, the reaction mixture was purified through preparative thin layer chromatography

on silica gel (petroleum ether/ethyl acetate = 5:1) to afford pure product **3ae** in 50% yield (25.8 mg) as colorless oil; 95:5 dr;  $[\alpha]_D^{20} = +88.0$  (c 0.29, acetone);  $^1\text{H}$  NMR (400 MHz,  $\text{CDCl}_3$ )  $\delta$  7.32 – 7.26 (m, 1H), 7.20 – 7.11 (m, 3H), 7.07 (d,  $J = 7.6$  Hz, 1H), 6.91 – 6.84 (m, 3H), 6.83 – 6.78 (m, 2H), 6.78 – 6.70 (m, 2H), 6.14 (s, 1H), 5.56 (s, 1H), 3.73 (s, 3H), 3.56 (s, 3H), 2.75 – 2.63 (m, 1H), 2.47 – 2.37 (m, 1H), 2.15 – 2.04 (m, 1H), 1.93 – 1.86 (m, 1H), 1.79 – 1.66 (m, 4H), 1.62 – 1.59 (m, 1H), 1.53 – 1.46 (m, 2H), 1.34 – 1.27 (m, 2H), 1.25 – 1.24 (m, 1H), 1.18 – 1.10 (m, 2H), 1.07 – 0.82 (m, 3H), 0.73 – 0.64 (m, 1H), 0.63 – 0.53 (m, 1H);  $^{13}\text{C}$  NMR (100 MHz,  $\text{CDCl}_3$ )  $\delta$  156.8, 155.4, 145.0, 141.1, 136.9, 131.4, 131.1, 129.7, 129.1, 128.0, 127.7, 127.4, 125.8, 121.0, 120.8, 120.2, 120.0, 119.6, 116.1, 110.4, 110.1, 109.3, 55.7, 41.7, 36.6, 33.7, 32.5, 31.2, 30.8, 30.4, 28.1, 27.2, 27.0, 26.9, 26.5, 25.9; IR (KBr): 3420, 2927, 2851, 1597, 1462, 1350, 1242, 1106, 751; ESI FTMS exact mass calcd for  $(\text{C}_{36}\text{H}_{41}\text{NO}_2\text{-H})^-$  requires  $m/z$  518.3064, found  $m/z$  518.3093; The enantiomeric ratio: 93:7, determined by HPLC (Daicel Chiralpak OD-3, hexane/ isopropanol = 95/ 5, flow rate 0.8 mL/min, T = 30 °C, 254 nm):  $t_R$  = 4.876 (major),  $t_R$  = 5.546 (minor).

**(*R,S*)-2-((2-(cyclohexyl(cyclohexylidene)methyl)-1-methyl-1H-indol-3-yl)(3-methoxyphenyl) methyl)-4-methoxyphenol (3af):**

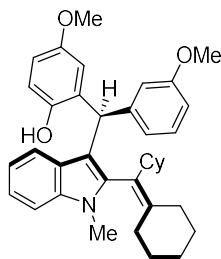

Following the general procedure, 2-alkenylindoles **1a** (92.3 mg, 0.3 mmol), *o*-hydroxybenzyl alcohol **2f** (26.0 mg, 0.1 mmol), CPA (*S*)-**7a** (21.6 mg, 0.03 mmol) and 5 Å MS (100 mg) were added to a reaction tube. Then, DCE (1 mL) was added to the reaction mixture, which was stirred at 0 °C for 48 h. After the completion of the reaction indicated by TLC, the reaction mixture was purified through preparative thin layer chromatography on silica gel (petroleum ether/ethyl acetate = 5:1) to afford pure product **3af** in 52% yield (28.6 mg) as colorless oil; 85:15 dr;  $[\alpha]_D^{20} = -122.1$  (c 0.18, acetone); <sup>1</sup>H

NMR (400 MHz, CDCl<sub>3</sub>) δ 7.26 – 7.23 (m, 1H), 7.15 – 7.08 (m, 2H), 7.03 (d, *J* = 8.0 Hz, 1H), 6.88 – 6.84 (m, 1H), 6.79 – 6.76 (m, 2H), 6.74 – 6.68 (m, 3H), 6.67 (s, 1H), 5.53 (s, 1H), 4.61 (s, 1H), 3.67 (s, 3H), 3.57 (s, 3H), 3.55 (s, 3H), 2.64 – 2.56 (m, 1H), 2.50 – 2.43 (m, 1H), 2.33 – 2.25 (m, 1H), 1.72 – 1.59 (m, 5H), 1.51 – 1.41 (m, 5H), 1.17 – 1.02 (m, 4H), 0.91 – 0.81 (m, 2H), 0.80 – 0.71 (m, 1H), 0.64 – 0.54 (m, 1H); <sup>13</sup>C NMR (100 MHz, CDCl<sub>3</sub>) δ 159.7, 153.8, 148.1, 144.4, 144.3, 139.8, 136.9, 131.2, 129.3, 127.5, 126.8, 121.5, 120.7, 120.3, 119.3, 116.8, 116.7, 115.0, 112.6, 111.6, 111.4, 109.1, 55.7, 55.1, 44.1, 41.1, 33.1, 32.8, 30.6, 30.4, 29.7, 28.2, 27.8, 26.9, 26.7, 26.6, 25.7; IR (KBr): 3424, 2924, 2851, 1673, 1589, 1388, 1359, 1122, 796; ESI FTMS exact mass calcd for (C<sub>37</sub>H<sub>43</sub>NO<sub>3</sub>+H)<sup>+</sup> requires *m/z* 550.3316, found *m/z* 550.3312; The enantiomeric ratio: 91:9, determined by HPLC (Daicel Chiralpak AD-3, hexane/ isopropanol = 95/ 5, flow rate 1.0 mL/min, T = 30 °C, 254 nm): *t<sub>R</sub>* = 9.426 (major), *t<sub>R</sub>* = 13.639 (minor).

**(*R<sub>a</sub>,S*)-2-((2-(cyclohexyl(cyclohexylidene)methyl)-1-methyl-1H-indol-3-yl)(3-methoxyphenyl)methyl)phenol (3ag):**

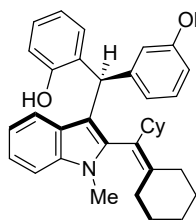

Following the general procedure, 2-alkenylindoles **1a** (92.3 mg, 0.3 mmol), *o*-hydroxybenzyl alcohol **2g** (23.0 mg, 0.1 mmol), CPA (*S*)-**7a** (21.6 mg, 0.03 mmol) and 3 Å MS (100 mg) were added to a reaction tube. Then, DCE (1 mL) was added to the reaction mixture, which was stirred at 0 °C for 48 h. After the completion of the reaction indicated by TLC, the reaction mixture was purified through preparative thin layer

chromatography on silica gel (petroleum ether/ethyl acetate = 5:1) to afford pure product **3ag** in 57% yield (29.7 mg) as colorless oil; 95:5 dr;  $[\alpha]_D^{20} = -121.1$  (c 0.28, acetone); <sup>1</sup>H NMR (400 MHz, CDCl<sub>3</sub>) δ 7.31 – 7.27 (m, 1H), 7.19 – 7.09 (m, 3H), 7.08 – 7.00 (m, 2H), 6.89 – 6.76 (m, 4H), 6.76 – 6.68 (m, 2H), 5.56 (s, 1H), 4.93 (s, 1H), 3.68 (s, 3H), 3.58 (s, 3H), 2.63 – 2.53 (m, 1H), 2.52 – 2.42 (m, 1H), 2.36 – 2.25 (m, 1H), 1.76 – 1.59 (m, 5H), 1.54 – 1.38 (m, 5H), 1.37 – 1.24 (m, 3H), 1.17 – 0.98 (m, 3H), 0.79 – 0.67 (m, 1H), 0.58 – 0.45 (m, 1H); <sup>13</sup>C NMR (100 MHz, CDCl<sub>3</sub>) δ 159.7, 154.0, 144.6, 144.2, 139.8, 136.9, 130.7, 129.7, 129.3, 127.9, 127.6, 126.8, 121.5, 120.7, 120.5, 119.2, 115.9, 115.1, 111.7, 111.5, 109.2, 55.1, 43.7, 41.1, 33.2, 32.8, 30.6, 30.5, 30.4, 28.3, 27.9, 26.8, 26.7, 26.6, 25.6; IR (KBr): 2929, 2813, 2715, 1632, 1382, 1349, 1119, 776; ESI FTMS exact mass calcd for (C<sub>36</sub>H<sub>41</sub>NO<sub>2</sub>-H)<sup>-</sup> requires *m/z* 518.3064, found *m/z* 518.3089; The enantiomeric ratio: 90:10, determined by HPLC (Daicel Chiralpak AD-3, hexane/ isopropanol = 98/ 2, flow rate 1.0 mL/min, T = 30 °C, 254 nm): *t<sub>R</sub>* = 12.449 (major), *t<sub>R</sub>* = 25.949 (minor).

**(*R,S*)-2-((2-(cyclohexyl(cyclohexylidene)methyl)-1-methyl-1H-indol-3-yl)(4-methoxyphenyl) methyl)-4-methoxyphenol (3ah):**

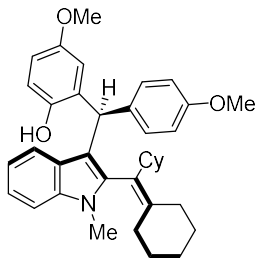

Following the general procedure, 2-alkenylindoles **1a** (92.3 mg, 0.3 mmol), *o*-hydroxybenzyl alcohol **2h** (26.0 mg, 0.1 mmol), CPA (*S*)-**7a** (14.4 mg, 0.02 mmol) and 3 Å MS (100 mg) were added to a reaction tube. Then, DCE (2 mL) was added to the reaction mixture, which was stirred at 0 °C for 36 h. After the completion of the reaction indicated by TLC, the reaction mixture was purified through preparative thin layer chromatography on silica gel (petroleum ether/ethyl acetate = 5:1) to afford pure product **3ah** in 65% yield (35.5 mg) as colorless oil; 80:20 dr;  $[\alpha]_D^{20} = -115.7$  (c 0.18, acetone); <sup>1</sup>H NMR (400 MHz, CDCl<sub>3</sub>) δ 7.26 – 7.23 (m, 1H), 7.14 – 7.04 (m, 3H), 6.98 (d, *J* = 8.0 Hz, 1H), 6.88 – 6.83 (m, 1H), 6.80 – 6.68 (m, 4H), 6.64 (s, 1H), 5.49 (s, 1H), 4.63 (s, 1H), 3.74 (s, 3H), 3.57 (s, 3H), 3.55 (s, 3H), 2.64 – 2.54 (m, 1H), 2.51 – 2.43 (m, 1H), 2.33 – 2.23 (m, 1H), 1.74 – 1.61 (m, 4H), 1.55 – 1.49 (m, 3H), 1.48 – 1.39 (m, 4H), 1.20 – 1.01 (m, 4H), 1.00 – 0.91 (m, 1H), 0.80 – 0.72 (m, 1H), 0.65 – 0.55 (m, 1H); <sup>13</sup>C NMR (100 MHz, CDCl<sub>3</sub>) δ 158.1, 153.7, 148.1, 144.2, 139.7, 136.9, 134.7, 131.5, 129.9, 127.4, 126.7, 120.7, 120.4, 119.2, 116.7, 116.6, 113.9, 112.4, 111.7, 109.2, 55.7, 55.3, 43.3, 41.1, 33.1, 32.8, 30.6, 30.4, 28.3, 27.8, 26.9, 26.7, 26.6, 25.7; IR (KBr): 3445, 2916, 2849, 1673, 1574, 1261, 1020, 799; ESI FTMS exact mass calcd for (C<sub>37</sub>H<sub>43</sub>NO<sub>3</sub>-H)<sup>-</sup> requires *m/z* 548.3170, found *m/z* 548.3186; The enantiomeric ratio: 90:10, determined by HPLC (Daicel Chiralpak IF, hexane/ isopropanol = 98/ 2, flow rate 0.5 mL/min, T = 30 °C, 254 nm): *t<sub>R</sub>* = 20.283 (major), *t<sub>R</sub>* = 23.513 (minor).

**(*R,S*)-2-((2-(cyclohexyl(cyclohexylidene)methyl)-1-methyl-1H-indol-3-yl)(*p*-tolyl)methyl) phenol (3ai):**

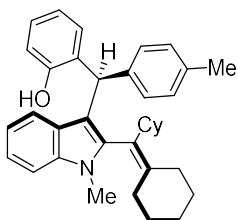

Following the general procedure, 2-alkenylindoles **1a** (92.3 mg, 0.3 mmol), *o*-hydroxybenzyl alcohol **2i** (21.4 mg, 0.1 mmol), CPA (*S*)-**7a** (21.6 mg, 0.03 mmol) and 3 Å MS (100 mg) were added to a reaction tube. Then, DCE (1 mL) was added to the reaction mixture, which was stirred at 0 °C for 48 h. After the completion of the reaction indicated by TLC, the reaction mixture was purified through preparative thin layer chromatography on silica gel (petroleum ether/ethyl acetate = 5:1) to afford pure product **3ai** in 56% yield (28.4 mg) as colorless oil; 83:17 dr;  $[\alpha]_D^{20} = -78.7$  (c 0.14, acetone); <sup>1</sup>H NMR (400 MHz, CDCl<sub>3</sub>) δ 7.30 – 7.26 (m, 1H), 7.17 – 7.09 (m, 2H), 7.08 – 6.97 (m, 6H), 6.89 – 6.77 (m, 3H), 5.53 (s, 1H), 4.90 (s, 1H), 3.57 (s, 3H), 2.63 – 2.52 (m, 1H), 2.50 – 2.42 (m, 1H), 2.37 – 2.30 (m, 1H), 2.27 (s, 3H), 1.77 – 1.60 (m, 5H), 1.51 – 1.28 (m, 8H), 1.14 – 1.05 (m, 2H), 1.00 – 0.94 (m, 1H), 0.78 – 0.66 (m, 1H), 0.56 – 0.44 (m, 1H); <sup>13</sup>C NMR (100 MHz, CDCl<sub>3</sub>) δ 154.0, 144.2, 139.7, 139.6, 136.9, 135.8, 130.7, 129.9, 129.1, 128.8, 127.8, 127.6, 126.9, 120.7, 120.6, 120.5, 119.1, 115.9, 112.0, 109.2, 43.3, 41.1, 33.2, 32.7, 30.6, 30.4, 28.3, 27.8, 26.8, 26.7, 26.6, 25.6, 21.1; IR (KBr): 3443, 2928, 2100, 1662, 1584, 1388, 1332, 781; ESI FTMS exact mass calcd for (C<sub>36</sub>H<sub>41</sub>NO-H)<sup>-</sup> requires *m/z* 502.3115, found *m/z* 502.3140; The enantiomeric ratio: 91:9, determined by HPLC (Daicel Chiralpak AD-3, hexane/ isopropanol = 98/ 2, flow rate 1.0 mL/min, T = 30 °C, 254 nm): *t<sub>R</sub>* = 7.196 (major), *t<sub>R</sub>* = 13.443 (minor).

**(*R,S*)-2-(benzo[d][1,3]dioxol-5-yl(2-(cyclohexyl(cyclohexylidene)methyl)-1-methyl-1H-indol-3-yl)methyl)phenol (3aj):**

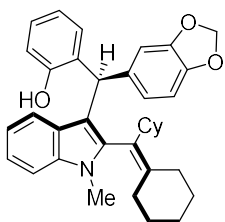

Following the general procedure, 2-alkenylindoles **1a** (92.3 mg, 0.3 mmol), *o*-hydroxybenzyl alcohol **2j** (24.4 mg, 0.1 mmol), CPA (*S*)-**7a** (14.4 mg, 0.02 mmol) and 3 Å MS (100 mg) were added to a reaction tube. Then, DCE (2 mL) was added to the reaction mixture, which was stirred at 0 °C for 36 h. After the completion of the reaction indicated by TLC, the reaction mixture was purified through preparative thin layer chromatography on silica gel (petroleum ether/ethyl acetate = 5:1) to afford pure product **3aj** in 69% yield (37.0 mg) as colorless oil; 82:18 dr;  $[\alpha]_D^{20} = -130.3$  (c 0.10, acetone);  $^1\text{H NMR}$  (400 MHz,  $\text{CDCl}_3$ )  $\delta$  7.31 – 7.27 (m, 1H), 7.19 – 7.10 (m, 2H), 7.09 – 7.01 (m, 2H), 6.92 – 6.86 (m, 1H), 6.85 – 6.78 (m, 2H), 6.70 – 6.60 (m, 3H), 5.87 (d,  $J = 10.4$  Hz, 2H), 5.49 (s, 1H), 4.92 (s, 1H), 3.57 (s, 3H), 2.61 – 2.52 (m, 1H), 2.50 – 2.43 (m, 1H), 2.34 – 2.26 (m, 1H), 1.77 – 1.61 (m, 4H), 1.61 – 1.59 (m, 1H), 1.56 – 1.42 (m, 3H), 1.41 – 1.31 (m, 5H), 1.15 – 1.05 (m, 2H), 1.01 – 0.93 (m, 1H), 0.75 – 0.65 (m, 1H), 0.54 – 0.43 (m, 1H);  $^{13}\text{C NMR}$  (100 MHz,  $\text{CDCl}_3$ )  $\delta$  153.9, 147.8, 146.0, 144.2, 139.7, 136.9, 130.6, 129.9, 127.9, 127.5, 126.8, 121.6, 120.7, 120.4, 119.2, 115.9, 111.8, 109.8, 109.2, 108.0, 100.8, 43.3, 41.1, 33.3, 32.7, 30.6, 30.5, 30.4, 28.3, 27.9, 26.8, 26.7, 26.6, 25.6; IR (KBr): 3420, 2925, 2851, 1594, 1383, 1351, 1121, 767; ESI FTMS exact mass calcd for  $(\text{C}_{36}\text{H}_{39}\text{NO}_3\text{-H})^-$  requires  $m/z$  532.2857, found  $m/z$  532.2867; The enantiomeric ratio: 91:9, determined by HPLC (Daicel Chiralpak IB, hexane/ isopropanol = 99/ 1, flow rate 0.5 mL/min, T = 30 °C, 254 nm):  $t_R = 23.439$  (major),  $t_R = 31.393$  (minor).

**(*R,S*)-2-((2-(cyclohexyl(cyclohexylidene)methyl)-1-methyl-1H-indol-3-yl)(phenyl)methyl) phenol (3ak):**

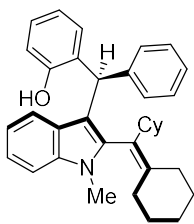

Following the general procedure, 2-alkenylindoles **1a** (92.3 mg, 0.3 mmol), *o*-hydroxybenzyl alcohol **2k** (20 mg, 0.1 mmol), CPA (*S*)-**7a** (14.4 mg, 0.02 mmol) and 3 Å MS (100 mg) were added to a reaction tube. Then, DCE (2 mL) was added to the reaction mixture, which was stirred at 0 °C for 36 h. After the completion of the reaction indicated by TLC, the reaction mixture was purified through preparative thin layer chromatography on silica gel (petroleum ether/ethyl acetate = 5:1) to afford pure product **3ak** in 50% yield (24.5 mg) as a white solid; m.p. 102-103 °C; 80:20 dr;  $[\alpha]_D^{20} = -131.6$  (c 0.14, acetone);  $^1\text{H NMR}$  (400 MHz,  $\text{CDCl}_3$ )  $\delta$  7.32 – 7.27 (m, 1H), 7.26 – 7.08 (m, 7H), 7.07 – 7.00 (m, 1H), 6.98 – 6.93 (m, 1H), 6.91 – 6.75 (m, 3H), 5.59 (s, 1H), 4.95 (s, 1H), 3.58 (s, 3H), 2.64 – 2.54 (m, 1H), 2.52 – 2.42 (m, 1H), 2.34 – 2.23 (m, 1H), 1.77 – 1.58 (m, 5H), 1.53 – 1.35 (m, 6H), 1.34 – 1.27 (m, 2H), 1.17 – 1.02 (m, 3H), 0.80 – 0.70 (m, 1H), 0.61 – 0.49 (m, 1H);  $^{13}\text{C NMR}$  (100 MHz,  $\text{CDCl}_3$ )  $\delta$  154.1, 144.3, 142.9, 140.0, 136.9, 130.6, 129.8, 129.0, 128.4, 127.9, 127.6, 126.7, 126.3, 120.7, 120.4, 119.2, 115.9, 111.7, 109.2, 43.7, 41.1, 33.1, 32.8, 30.6, 30.4, 29.7, 28.2, 27.8, 26.9, 26.7, 26.6, 25.6; IR (KBr): 3444, 2924, 2853, 1673, 1580, 1455, 1261, 1076, 741; ESI FTMS exact mass calcd for  $(\text{C}_{35}\text{H}_{39}\text{NO-H})^-$  requires  $m/z$  488.2959, found  $m/z$  488.2970; The enantiomeric ratio: 90:10, determined by HPLC (Daicel

Chiralpak OD-3, hexane/ isopropanol = 98/ 2, flow rate 0.8 mL/min, T = 30 °C, 254 nm):  $t_R$  = 5.926 (major),  $t_R$  = 7.326 (minor).

**(*R,S*)-2-((2-(cyclohexyl(cyclohexylidene)methyl)-5-fluoro-1-methyl-1H-indol-3-yl)(2-methoxyphenyl)methyl)-4-methoxyphenol (3ba):**

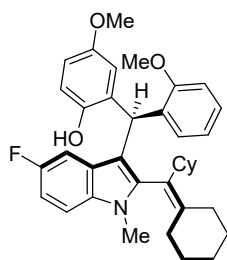

Following the general procedure, 2-alkenylindoles **1b** (97.6 mg, 0.3 mmol), *o*-hydroxybenzyl alcohol **2a** (26.0 mg, 0.1 mmol), CPA (*S*)-**7a** (21.6 mg, 0.03 mmol) and 3 Å MS (100 mg) were added to a reaction tube. Then, DCE (1 mL) was added to the reaction mixture, which was stirred at 0 °C for 48 h. After the completion of the reaction indicated by TLC, the reaction mixture was purified through preparative thin layer chromatography on silica gel (petroleum ether/ethyl acetate = 5:1) to afford pure product **3ba** in 53% yield (30.1 mg) as colorless oil; 89:11 dr;  $[\alpha]_D^{20}$  = +105.3 (c 0.4, acetone);  $^1\text{H NMR}$  (400 MHz,  $\text{CDCl}_3$ )  $\delta$  7.19 – 7.12 (m, 2H), 7.03 – 6.97 (m, 1H), 6.90 – 6.82 (m, 2H), 6.79 – 6.70 (m, 3H), 6.54 – 6.45 (m, 1H), 6.34 (s, 1H), 6.07 (s, 1H), 5.05 (s, 1H), 3.72 (s, 3H), 3.64 (s, 3H), 3.53 (s, 3H), 2.72 – 2.61 (m, 1H), 2.45 – 2.35 (m, 1H), 2.15 – 2.02 (m, 1H), 1.93 – 1.83 (m, 1H), 1.79 – 1.60 (m, 5H), 1.53 – 1.28 (m, 5H), 1.17 – 0.81 (m, 5H), 0.73 – 0.57 (m, 2H);  $^{13}\text{C NMR}$  (100 MHz,  $\text{CDCl}_3$ )  $\delta$  157.7 (d,  $J$  = 232.2 Hz), 156.7, 149.2, 145.1, 142.8, 133.5, 130.9, 130.8, 130.7, 128.0 (d,  $J$  = 10.2 Hz), 127.6, 125.7, 120.8, 116.5, 115.9, 111.9, 110.5, 110.2, 109.8, (d,  $J$  = 9.8 Hz), 109.2 (d,  $J$  = 26.4 Hz) 104.8 (d,  $J$  = 24.1 Hz), 55.6, 41.6, 36.8, 33.5, 32.5, 31.2, 30.9, 30.4, 28.0, 27.2, 27.0, 26.9, 26.5, 25.9;  $^{19}\text{F NMR}$  (376 MHz,  $\text{CDCl}_3$ )  $\delta$  -124.16; IR (KBr): 3446, 2926, 2851, 1660, 1577, 1489, 1242, 793, 573; ESI FTMS exact mass calcd for  $(\text{C}_{37}\text{H}_{42}\text{FNO}_3\text{-H})^-$  requires  $m/z$  566.3076, found  $m/z$  566.3084; The enantiomeric ratio: 92:8, determined by HPLC (Daicel Chiralpak OD-3, hexane/ isopropanol = 98/ 2, flow rate 0.8 mL/min, T = 30 °C, 254 nm):  $t_R$  = 5.393 (major),  $t_R$  = 6.473 (minor).

**(*R,S*)-2-((2-(cyclohexyl(cyclohexylidene)methyl)-5-fluoro-1-methyl-1H-indol-3-yl)(*p*-tolyl)methyl)phenol (3bi):**

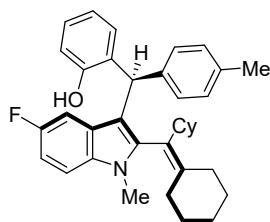

Following the general procedure, 2-alkenylindoles **1b** (97.6 mg, 0.3 mmol), *o*-hydroxybenzyl alcohol **2i** (21.4 mg, 0.1 mmol), CPA (*S*)-**7a** (14.4 mg, 0.02 mmol) and 3 Å MS (100 mg) were added to a reaction tube. Then, DCE (2 mL) was added to the reaction mixture, which was stirred at 0 °C for 36 h. After the completion of the reaction indicated by TLC, the reaction mixture was purified through preparative thin layer chromatography on silica gel (petroleum ether/ethyl acetate = 5:1) to afford pure product **3bi** in 43% yield (22.4 mg) as colorless oil; 80:20 dr;  $[\alpha]_D^{20}$  = -132.3 (c 0.17, acetone);  $^1\text{H NMR}$  (400 MHz,  $\text{CDCl}_3$ )  $\delta$  7.19 – 7.12 (m, 2H), 7.08 – 6.96 (m, 5H), 6.89 – 6.77 (m, 3H), 6.63 (d,  $J$  = 10.4 Hz, 1H), 5.51 (s, 1H), 4.81 (s, 1H), 3.55 (s, 3H), 2.60 – 2.51 (m, 1H), 2.49 – 2.41 (m, 1H), 2.37 – 2.30 (m, 1H), 2.28 (s, 3H), 1.73 – 1.61 (m, 4H), 1.53 – 1.43 (m, 2H), 1.42 – 1.28 (m, 6H), 1.15 – 1.03 (m, 2H), 1.02 – 0.77 (m, 2H), 0.76 – 0.64 (m, 1H), 0.54 – 0.41 (m, 1H);  $^{13}\text{C NMR}$  (100 MHz,  $\text{CDCl}_3$ )  $\delta$  157.4 (d,  $J$  = 231.6 Hz), 153.8, 144.3, 141.4, 139.3, 136.0, 133.5,

130.6, 129.6, 129.2, 128.7, 128.0, 127.8 (d,  $J = 10.1$  Hz), 126.8, 120.8, 115.9, 112.3, 112.2, 109.6 (d,  $J = 9.8$  Hz), 108.8 (d,  $J = 26.3$  Hz), 105.3 (d,  $J = 23.8$  Hz), 43.1, 41.0, 33.2, 32.6, 30.8, 30.5, 30.4, 28.2, 27.9, 26.8, 26.7, 26.6, 25.6, 21.1;  $^{19}\text{F}$  NMR (376 MHz,  $\text{CDCl}_3$ )  $\delta$  -124.7; IR (KBr): 2926, 2852, 1632, 1456, 1353, 1126, 786; ESI FTMS exact mass calcd for  $(\text{C}_{36}\text{H}_{40}\text{FNO}-\text{H})^-$  requires  $m/z$  520.3021, found  $m/z$  520.3031; The enantiomeric ratio: 91:9, determined by HPLC (Daicel Chiralpak OD-3, hexane/ isopropanol = 98/ 2, flow rate 1.0 mL/min,  $T = 30$  °C, 254 nm):  $t_{\text{R}} = 5.019$  (major),  $t_{\text{R}} = 7.873$  (minor).

**(*R,S*)-2-((5-chloro-2-(cyclohexyl(cyclohexylidene)methyl)-1-methyl-1H-indol-3-yl)(2-methoxyphenyl)methyl)-4-methoxyphenol (3ca):**

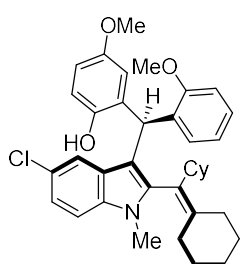

Following the general procedure, 2-alkenylindoles **1c** (102.6 mg, 0.3 mmol), *o*-hydroxybenzyl alcohol **2a** (26.0 mg, 0.1 mmol), CPA (*S*)-**7a** (14.4 mg, 0.02 mmol) and 3 Å MS (100 mg) were added to a reaction tube. Then, DCE (2 mL) was added to the reaction mixture, which was stirred at 0 °C for 36 h. After the completion of the reaction indicated by TLC, the reaction mixture was purified through preparative thin layer chromatography on silica gel (petroleum ether/ethyl acetate = 5:1) to afford pure product **3ca** in 50% yield (29.2 mg) as colorless oil; 91:9 dr;  $[\alpha]_{\text{D}}^{20} = +67.0$  (c 0.19, acetone);  $^1\text{H}$  NMR (400 MHz,  $\text{CDCl}_3$ )  $\delta$  7.19 – 7.13 (m, 2H), 7.08 – 7.04 (m, 1H), 6.99 (d,  $J = 7.6$  Hz, 1H), 6.84 (d,  $J = 8.2$  Hz, 1H), 6.80 – 6.69 (m, 4H), 6.34 (s, 1H), 6.06 (s, 1H), 4.95 (s, 1H), 3.71 (s, 3H), 3.65 (s, 3H), 3.52 (s, 3H), 2.70 – 2.59 (m, 1H), 2.45 – 2.36 (m, 1H), 2.11 – 2.03 (m, 1H), 1.89 – 1.81 (m, 1H), 1.70 – 1.54 (m, 6H), 1.52 – 1.36 (m, 4H), 1.17 – 1.07 (m, 2H), 0.99 – 0.84 (m, 3H), 0.75 – 0.61 (m, 2H);  $^{13}\text{C}$  NMR (100 MHz,  $\text{CDCl}_3$ )  $\delta$  156.7, 153.5, 149.1, 145.2, 142.4, 135.2, 130.9, 130.7, 130.6, 128.8, 127.7, 125.6, 125.1, 121.2, 120.9, 119.3, 116.6, 116.1, 112.0, 110.5, 110.3, 110.1, 55.7, 55.6, 41.6, 36.8, 33.5, 32.5, 31.1, 30.9, 30.4, 29.7, 28.0, 27.2, 27.1, 26.9, 26.5, 25.9; IR (KBr): 3451, 2927, 2851, 1667, 1489, 1242, 1031, 753; ESI FTMS exact mass calcd for  $(\text{C}_{37}\text{H}_{42}\text{ClNO}_3-\text{H})^-$  requires  $m/z$  582.2780, found  $m/z$  582.2800; The enantiomeric ratio: 92:8, determined by HPLC (Daicel Chiralpak AD-3, hexane/ isopropanol = 95/ 5, flow rate 1.0 mL/min,  $T = 30$  °C, 254 nm):  $t_{\text{R}} = 5.566$  (major),  $t_{\text{R}} = 9.849$  (minor).

**(*R,S*)-2-((5-chloro-2-(cyclohexyl(cyclohexylidene)methyl)-1-methyl-1H-indol-3-yl)(phenyl)methyl)-4-methylphenol (3cc):**

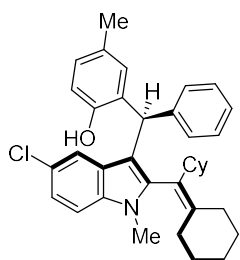

Following the general procedure, 2-alkenylindoles **1c** (102.6 mg, 0.3 mmol), *o*-hydroxybenzyl alcohol **2c** (21.4 mg, 0.1 mmol), CPA (*S*)-**7a** (14.4 mg, 0.02 mmol) and 3 Å MS (100 mg) were added to a reaction tube. Then, DCE (1 mL) was added to the reaction mixture, which was stirred at 0 °C for 36 h. After the completion of the reaction indicated by TLC, the reaction mixture was purified through preparative thin layer chromatography on silica gel (petroleum ether/ethyl acetate = 5:1) to afford pure product **3cc** in 42% yield (22.6 mg) as colorless oil; 80:20 dr;  $[\alpha]_{\text{D}}^{20} = -28.8$  (c 0.39, acetone);  $^1\text{H}$  NMR (400 MHz,  $\text{CDCl}_3$ )  $\delta$  7.26 – 7.10 (m, 6H), 7.05 (d,  $J = 8.6$  Hz, 1H), 6.97 (d,  $J = 7.9$  Hz, 1H), 6.86 (s, 1H), 6.81 – 6.69 (m,

2H), 5.53 (s, 1H), 4.63 (s, 1H), 3.55 (s, 3H), 2.59 – 2.50 (m, 1H), 2.48 – 2.40 (m, 1H), 2.33 – 2.25 (m, 1H), 2.14 (s, 3H), 1.65 – 1.59 (m, 3H), 1.54 – 1.45 (m, 3H), 1.43 – 1.36 (m, 3H), 1.34 – 1.30 (m, 2H), 1.15 – 1.05 (m, 2H), 1.02 – 0.80 (m, 3H), 0.78 – 0.67 (m, 1H), 0.59 – 0.47 (m, 1H); <sup>13</sup>C NMR (100 MHz, CDCl<sub>3</sub>) δ 151.6, 144.5, 142.5, 141.2, 135.3, 131.0, 129.9, 129.2, 128.9, 128.6, 128.5, 128.4, 126.6, 126.5, 124.8, 120.9, 119.6, 115.8, 111.9, 110.1, 43.5, 41.0, 33.1, 32.6, 30.7, 30.5, 30.4, 29.7, 28.2, 27.9, 26.8, 26.7, 26.6, 25.6, 20.9; IR (KBr): 2925, 2852, 1748, 1631, 1489, 1362, 1261, 1110, 811; ESI FTMS exact mass calcd for (C<sub>36</sub>H<sub>40</sub>ClNO-H)<sup>-</sup> requires m/z 536.2725, found m/z 536.2747; The enantiomeric ratio: 91:9, determined by HPLC (Daicel Chiralpak OD-3, hexane/ isopropanol = 98/ 2, flow rate 1.0 mL/min, T = 30 °C, 254 nm): t<sub>R</sub> = 5.226 (major), t<sub>R</sub> = 6.199 (minor).

**(*R,S*)-2-((5-bromo-2-(cyclohexyl(cyclohexylidene)methyl)-1-methyl-1H-indol-3-yl)(2-methoxyphenyl)methyl)-4-methoxyphenol (3da):**

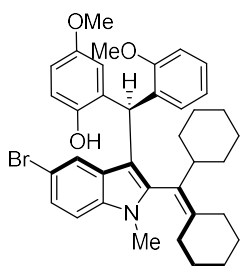

Following the general procedure, 2-alkenylindoles **1d** (115.1 mg, 0.3 mmol), *o*-hydroxybenzyl alcohol **2a** (21.4 mg, 0.1 mmol), CPA (*S*)-**7a** (14.4 mg, 0.02 mmol) and 3 Å MS (100 mg) were added to a reaction tube. Then, DCE (1 mL) was added to the reaction mixture, which was stirred at 0 °C for 36 h. After the completion of the reaction indicated by TLC, the reaction mixture was purified through preparative thin layer chromatography on silica gel (petroleum ether/ethyl acetate = 5:1) to afford pure product **3da** in 55% yield (34.6 mg) as colorless oil; 91:9 dr; [α]<sub>D</sub><sup>20</sup> = -102.2 (c 0.11, acetone); <sup>1</sup>H

NMR (400 MHz, CDCl<sub>3</sub>) δ 7.22 – 7.10 (m, 3H), 6.99 (d, *J* = 7.6 Hz, 1H), 6.93 (s, 1H), 6.84 (d, *J* = 8.2 Hz, 1H), 6.80 – 6.70 (m, 3H), 6.35 (s, 1H), 6.06 (s, 1H), 4.93 (s, 1H), 3.71 (s, 3H), 3.65 (s, 3H), 3.52 (s, 3H), 2.69 – 2.60 (m, 1H), 2.45 – 2.37 (m, 1H), 2.12 – 2.03 (m, 1H), 1.90 – 1.82 (m, 1H), 1.78 – 1.53 (m, 7H), 1.49 – 1.38 (m, 2H), 1.33 – 1.29 (m, 1H), 1.23 – 1.05 (m, 3H), 0.98 – 0.88 (m, 2H), 0.77 – 0.58 (m, 2H); <sup>13</sup>C NMR (100 MHz, CDCl<sub>3</sub>) δ 156.7, 153.5, 149.1, 145.2, 142.3, 135.4, 130.9, 130.6, 130.6, 129.4, 127.7, 125.5, 123.7, 122.3, 120.9, 116.6, 116.1, 112.9, 112.0, 110.7, 110.5, 110.1, 55.7, 55.6, 41.6, 36.8, 33.5, 32.5, 31.1, 30.8, 30.4, 28.0, 27.2, 27.1, 26.8, 26.5, 25.9; IR (KBr): 3447, 2920, 2763, 1673, 1569, 1275, 795, 750; ESI FTMS exact mass calcd for (C<sub>37</sub>H<sub>42</sub>BrNO<sub>3</sub>-H)<sup>-</sup> requires m/z 626.2275, found m/z 626.2301; The enantiomeric ratio: 92:8, determined by HPLC (Daicel Chiralpak ID, hexane/ isopropanol = 98/ 2, flow rate 1.0 mL/min, T = 30 °C, 254 nm): t<sub>R</sub> = 7.766 (major), t<sub>R</sub> = 9.309 (minor).

**(*R,S*)-2-((1-benzyl-2-(cyclohexyl(cyclohexylidene)methyl)-1H-indol-3-yl)(*p*-tolyl)methyl) phenol (3ei):**

Following the general procedure, 2-alkenylindoles **1e** (115.1 mg, 0.3 mmol), *o*-hydroxybenzyl alcohol **2i** (21.4 mg, 0.1 mmol), CPA (*S*)-**7a** (14.4 mg, 0.02 mmol) and 3 Å MS (100 mg) were added to a reaction tube. Then, DCE (1 mL) was added to the reaction mixture, which was stirred at 0 °C for 36 h. After the completion of the reaction indicated by TLC, the reaction mixture was purified through preparative thin layer chromatography on silica gel (petroleum ether/ethyl acetate = 5:1) to afford pure product **3ei** in 44% yield (25.5 mg) as colorless oil;



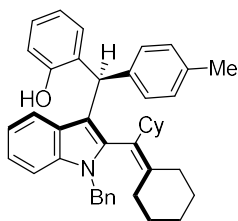

75:25 dr;  $[\alpha]_D^{20} = -102.2$  (c 0.11, acetone);  $^1\text{H NMR}$  (400 MHz,  $\text{CDCl}_3$ )  $\delta$  7.31 – 7.26 (m, 2H), 7.26 – 7.20 (m, 2H), 7.19 – 7.13 (m, 1H), 7.12 – 7.02 (m, 7H), 7.02 – 6.94 (m, 2H), 6.89 – 6.77 (m, 3H), 5.58 (s, 1H), 5.31 – 5.15 (m, 2H), 4.87 (s, 1H), 2.50 – 2.41 (m, 1H), 2.37 – 2.31 (m, 2H), 2.29 (s, 3H), 1.73 – 1.67 (m, 1H), 1.60 – 1.51 (m, 5H), 1.47 – 1.41 (m, 2H), 1.37 – 1.30 (m, 4H), 1.00 – 0.83 (m, 4H), 0.79 – 0.70 (m, 1H), 0.52 – 0.40 (m, 1H);  $^{13}\text{C NMR}$  (100 MHz,  $\text{CDCl}_3$ )  $\delta$  153.9, 145.1, 140.2, 139.5, 137.8, 136.7, 135.9, 130.7, 129.9, 129.2, 128.8, 128.5, 128.0, 127.9, 127.0, 126.7, 126.6, 120.8, 120.7, 120.6, 119.3, 115.9, 112.6, 110.8, 48.1, 43.2, 41.4, 33.6, 32.6, 30.7, 30.6, 29.7, 28.2, 28.0, 26.9, 26.6, 25.6, 21.1; IR (KBr): 3420, 2925, 2815, 1594, 1383, 1351, 1122, 766, 617; ESI FTMS exact mass calcd for  $(\text{C}_{42}\text{H}_{45}\text{NO}+\text{Na})^+$  requires  $m/z$  602.3393, found  $m/z$  602.3399; The enantiomeric ratio: 91:9, determined by HPLC (Daicel Chiralpak OD-3, hexane/ isopropanol = 98/ 2, flow rate 1.0 mL/min, T = 30 °C, 254 nm):  $t_R = 10.023$  (major),  $t_R = 12.343$  (minor).

**(*S<sub>a</sub>,R*)-2-((2-(cyclopentyl(cyclopentylidene)methyl)-1-methyl-1H-indol-3-yl)(2-methoxyphenyl)methyl)-4-methoxyphenol (3fa):**

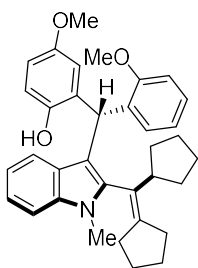

Following the general procedure, 2-alkenylindoles **1f** (83.8 mg, 0.3 mmol), *o*-hydroxybenzyl alcohol **2a** (26.0 mg, 0.1 mmol), CPA (*S*)-5i (20mg, 0.02 mmol) and 3 Å MS (100 mg) were added to a reaction tube. Then, DCE (2 mL) was added to the reaction mixture, which was stirred at 0 °C for 36 h. After the completion of the reaction indicated by TLC, the reaction mixture was purified through preparative thin layer chromatography on silica gel (petroleum ether/ethyl acetate = 5:1) to afford pure product **3fa** in 46% yield (24.0 mg) as colorless oil; 85:15 dr;  $[\alpha]_D^{20} = -48.6$  (c 0.35, acetone);  $^1\text{H NMR}$  (400 MHz,  $\text{CDCl}_3$ )  $\delta$  7.32 – 7.26 (m, 1H), 7.20 – 7.09 (m, 3H), 6.96 – 6.81 (m, 3H), 6.80 – 6.67 (m, 3H), 6.42 (s, 1H), 6.10 (s, 1H), 5.09 (s, 1H), 3.74 (s, 3H), 3.65 (s, 3H), 3.53 (s, 3H), 2.96 – 2.85 (m, 1H), 2.46 – 2.36 (m, 1H), 2.32 – 2.21 (m, 1H), 1.90 – 1.80 (m, 1H), 1.75 – 1.57 (m, 4H), 1.54 – 1.41 (m, 3H), 1.27 – 1.08 (m, 4H), 0.95 – 0.86 (m, 1H), 0.81 – 0.71 (m, 1H);  $^{13}\text{C NMR}$  (100 MHz,  $\text{CDCl}_3$ )  $\delta$  156.6, 153.3, 150.2, 149.5, 141.4, 136.9, 131.2, 131.1, 127.7, 127.5, 123.7, 121.0, 120.9, 120.0, 119.5, 116.5, 115.8, 111.6, 110.6, 109.5, 109.3, 55.6, 55.5, 45.4, 36.6, 31.9, 31.6, 30.8, 30.6, 30.1, 26.4, 26.0, 24.9, 24.7. IR (KBr): 3436, 2929, 2866, 1598, 1489, 1465, 1399, 1243, 1030, 752; ESI FTMS exact mass calcd for  $(\text{C}_{35}\text{H}_{39}\text{NO}_3-\text{H})^-$  requires  $m/z$  520.2857, found  $m/z$  520.2878; The enantiomeric ratio: 90:10, determined by HPLC (Daicel Chiralpak AD-3, hexane/ isopropanol = 98/ 2, flow rate 1.0 mL/min, T = 30 °C, 254 nm):  $t_R = 11.252$  (minor),  $t_R = 23.098$  (major).

**(*S<sub>a</sub>,R*)-2-((2-(2,4-dimethylpent-2-en-3-yl)-1-methyl-1H-indol-3-yl)(2-methoxyphenyl)methyl)-4-methoxyphenol (3ga):**

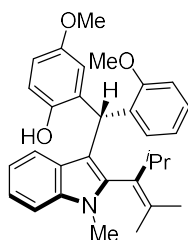

Following the general procedure, 2-alkenylindoles **1g** (68.2 mg, 0.3 mmol), *o*-hydroxybenzyl alcohol **2a** (26.0 mg, 0.1 mmol), CPA (*S*)-**5i** (20.0 mg, 0.02 mmol) and 3 Å MS (100 mg) were added to a reaction tube. Then, DCE (4 mL) was added to the reaction mixture, which was stirred at 0 °C for 36 h. After the completion of the reaction indicated by TLC, the reaction mixture was purified through preparative thin layer chromatography on silica gel (petroleum ether/ethyl acetate = 5:1) to afford pure product **3ga** in 44% yield (20.7 mg) as colorless oil; 86:14 dr;  $[\alpha]_D^{20} = -21.2$  (c 0.58, acetone);  $^1\text{H NMR}$  (400 MHz,  $\text{CDCl}_3$ )  $\delta$  7.31 – 7.27 (m, 1H), 7.18 – 7.10 (m, 3H), 7.01 – 6.96 (m, 1H), 6.94 – 6.88 (m, 1H), 6.84 (d,  $J = 8.4$  Hz, 1H), 6.78 – 6.69 (m, 3H), 6.44 (s, 1H), 6.13 (s, 1H), 5.21 (s, 1H), 3.74 (s, 3H), 3.65 (s, 3H), 3.52 (s, 3H), 3.14 – 3.02 (m, 1H), 1.77 (s, 3H), 1.34 (d,  $J = 8.8$  Hz, 3H), 0.95 (d,  $J = 6.9$  Hz, 3H), 0.55 (s, 3H);  $^{13}\text{C NMR}$  (100 MHz,  $\text{CDCl}_3$ )  $\delta$  156.5, 153.4, 149.4, 140.9, 137.4, 137.0, 131.3, 131.1, 129.1, 127.7, 127.4, 121.1, 120.8, 120.0, 119.6, 116.5, 115.8, 111.6, 110.4, 110.3, 109.4, 55.6, 36.6, 31.4, 30.4, 23.0, 22.0, 20.9, 19.7; IR (KBr): 3433, 2927, 1598, 1490, 1464, 1364, 1243, 1208, 1031, 742; ESI FTMS exact mass calcd for  $(\text{C}_{31}\text{H}_{35}\text{NO}_3\text{-H})^-$  requires  $m/z$  468.2544, found  $m/z$  468.2557; The enantiomeric ratio: 86:14, determined by HPLC (Daicel Chiralpak AD-3, hexane/ isopropanol = 98/ 2, flow rate 1.0 mL/min, T = 30 °C, 254 nm):  $t_R = 11.329$  (minor),  $t_R = 14.323$  (major).

**(*R,R*)-2-((2-(cyclohexyl(cyclohexylidene)methyl)-1-methyl-1H-indol-3-yl)(2-methoxyphenyl) methyl)-4-methoxyphenol (**4aa**):**

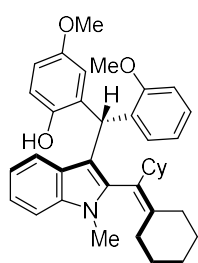

Following the general procedure, 2-alkenylindoles **1a** (61.5 mg, 0.2 mmol), *o*-hydroxybenzyl alcohol **2a** (26.0 mg, 0.1 mmol), CPA (*S*)-**7b** (6.6 mg, 0.01 mmol) and 4 Å MS (100 mg) were added to a reaction tube. Then, *p*-xylene (4 mL) was added to the reaction mixture, which was stirred at 20 °C for 12 h. After the completion of the reaction indicated by TLC, the reaction mixture was purified through flash column chromatography on silica gel (petroleum ether/ethyl acetate = 5:1) to afford pure product **4aa** in 99% yield (54.4 mg) as white solid; 92:8 dr; m.p. 100-101 °C;  $[\alpha]_D^{20} = -29.8$  (c 0.24, acetone);  $^1\text{H NMR}$  (400 MHz,  $\text{CDCl}_3$ )  $\delta$  7.36 – 7.32 (m, 1H), 7.30 – 7.24 (m, 1H), 7.22 – 7.16 (m, 2H), 7.05 (d,  $J = 8.0$  Hz, 1H), 6.96 – 6.89 (m, 2H), 6.88 – 6.83 (m, 1H), 6.71 (s, 2H), 6.48 (s, 1H), 5.81 (s, 1H), 5.08 (s, 1H), 3.75 (s, 3H), 3.71 (s, 3H), 3.64 (s, 3H), 2.64 – 2.56 (m, 1H), 2.50 – 2.41 (m, 1H), 2.39 – 2.29 (m, 1H), 1.93 – 1.83 (m, 2H), 1.81 – 1.75 (m, 1H), 1.71 – 1.59 (m, 5H), 1.43 – 1.27 (m, 4H), 1.26 – 1.20 (m, 1H), 1.14 – 1.00 (m, 2H), 0.99 – 0.90 (m, 1H), 0.73 – 0.62 (m, 1H), 0.31 – 0.17 (m, 1H);  $^{13}\text{C NMR}$  (100 MHz,  $\text{CDCl}_3$ )  $\delta$  156.9, 153.2, 149.0, 144.4, 140.1, 136.8, 131.0, 131.0, 130.8, 128.1, 128.0, 126.9, 121.1, 120.6, 120.5, 119.5, 116.2, 115.6, 111.8, 110.4, 109.6, 109.3, 55.6, 55.4, 41.4, 38.2, 33.2, 31.8, 30.6, 30.5, 29.8, 28.1, 27.7, 26.8, 26.6, 26.4, 25.3; IR (KBr): 2927, 2852, 2769, 1489, 1464, 1372, 1243, 1030, 804; ESI FTMS exact mass calcd for  $(\text{C}_{37}\text{H}_{43}\text{NO}_3\text{+Na})^+$  requires  $m/z$  572.3135, found  $m/z$  572.3143; The enantiomeric ratio: 93:7, determined by HPLC (Daicel Chiralpak AD-3, hexane/ isopropanol = 98/ 2, flow rate 0.8 mL/min, T = 30 °C, 254 nm):  $t_R = 7.766$  (minor),  $t_R = 9.309$  (major).

**(*R,R*)-2-((2-(cyclohexyl(cyclohexylidene)methyl)-1-methyl-1H-indol-3-yl)(phenyl)methyl)-4-methylphenol (4ac):**

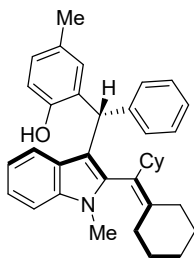

Following the general procedure, 2-alkenylindoles **1a** (61.5 mg, 0.2 mmol), *o*-hydroxybenzyl alcohol **2c** (21.4 mg, 0.1 mmol), CPA (*S*)-**7b** (6.6 mg, 0.01 mmol) and 4 Å MS (100 mg) were added to a reaction tube. Then, *p*-xylene (4 mL) was added to the reaction mixture, which was stirred at 20 °C for 12 h. After the completion of the reaction indicated by TLC, the reaction mixture was purified through flash column chromatography on silica gel (petroleum ether/ethyl acetate = 5:1) to afford pure product **4ac** in 99% yield (49.8 mg) as colorless oil; 83:17 dr;  $[\alpha]_{\text{D}}^{20} = +113$  (c 0.13, acetone)  $^1\text{H NMR}$  (400 MHz,  $\text{CDCl}_3$ )  $\delta$  7.34 – 7.26 (m, 3H), 7.25 – 7.19 (m, 3H), 7.17 – 7.10 (m, 1H), 6.94 – 6.83 (m, 3H), 6.73 (s, 1H), 6.67 (d,  $J = 8.1$  Hz, 1H), 5.68 (s, 1H), 4.97 (s, 1H), 3.62 (s, 3H), 2.63 – 2.54 (m, 1H), 2.50 – 2.41 (m, 1H), 2.34 – 2.26 (m, 1H), 2.15 (s, 3H), 1.79 – 1.71 (m, 1H), 1.66 – 1.60 (m, 2H), 1.55 – 1.38 (m, 7H), 1.33 – 1.05 (m, 6H), 0.94 – 0.84 (m, 1H), 0.70 – 0.56 (m, 1H);  $^{13}\text{C NMR}$  (100 MHz,  $\text{CDCl}_3$ )  $\delta$  152.0, 145.0, 142.9, 140.1, 137.0, 131.1, 129.8, 129.5, 129.4, 128.3, 128.2, 127.4, 126.5, 126.3, 120.8, 120.5, 119.4, 115.8, 111.2, 109.3, 43.4, 41.3, 33.1, 33.0, 31.1, 30.7, 30.5, 28.2, 27.4, 26.8, 26.6, 26.5, 25.8, 20.8; IR (KBr): 3420, 2814, 2716, 1632, 1597, 1382, 1351, 1123, 776, 618; ESI FTMS exact mass calcd for  $(\text{C}_{36}\text{H}_{41}\text{NO}-\text{H})^-$  requires  $m/z$  502.3115, found  $m/z$  502.3121; The enantiomeric ratio: 92:8, determined by HPLC (Daicel Chiralpak AD-3, hexane/ isopropanol = 98/ 2, flow rate 0.8 mL/min, T = 30 °C, 254 nm):  $t_{\text{R}} = 7.396$  (minor),  $t_{\text{R}} = 12.299$  (major).

**(*R,R*)-5-bromo-2-((2-(cyclohexyl(cyclohexylidene)methyl)-1-methyl-1H-indol-3-yl)(2-methoxyphenyl)methyl)phenol (4al):**

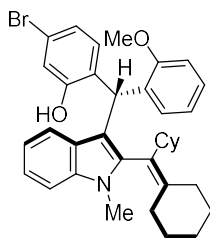

Following the general procedure, 2-alkenylindoles **1a** (61.5 mg, 0.2 mmol), *o*-hydroxybenzyl alcohol **2l** (30.9 mg, 0.1 mmol), CPA (*S*)-**7b** (6.6 mg, 0.01 mmol) and 4 Å MS (100 mg) were added to a reaction tube. Then, *p*-xylene (4 mL) was added to the reaction mixture, which was stirred at 20 °C for 12 h. After the completion of the reaction indicated by TLC, the reaction mixture was purified through flash column chromatography on silica gel (petroleum ether/ethyl acetate = 5:1) to afford pure product **4al** in 99% yield (59.5 mg) as colorless oil; >95:5 dr;  $[\alpha]_{\text{D}}^{20} = +17.9$  (c 0.22, acetone);  $^1\text{H NMR}$  (400 MHz,  $\text{CDCl}_3$ )  $\delta$  7.32 – 7.28 (m, 1H), 7.26 – 7.21 (m, 1H), 7.19 – 7.08 (m, 2H), 6.99 – 6.85 (m, 5H), 6.85 – 6.78 (m, 1H), 6.65 (d,  $J = 8.2$  Hz, 1H), 5.68 (s, 1H), 5.50 (s, 1H), 3.70 (s, 3H), 3.59 (s, 3H), 2.58 – 2.48 (m, 1H), 2.44 – 2.35 (m, 1H), 2.35 – 2.26 (m, 1H), 1.87 – 1.71 (m, 3H), 1.68 – 1.58 (m, 4H), 1.50 – 1.42 (m, 1H), 1.38 – 1.20 (m, 4H), 1.19 – 1.12 (m, 1H), 1.08 – 0.98 (m, 1H), 0.96 – 0.80 (m, 2H), 0.65 – 0.53 (m, 1H), 0.23 – 0.09 (m, 1H);  $^{13}\text{C NMR}$  (100 MHz,  $\text{CDCl}_3$ )  $\delta$  156.8, 155.6, 144.5, 140.2, 136.9, 130.8, 130.7, 130.3, 128.9, 128.2, 127.9, 126.9, 123.0, 121.3, 120.6, 120.4, 119.7, 119.1, 110.4, 109.4, 108.9, 41.4, 37.7, 33.3, 31.8, 30.6, 30.5, 29.8, 28.1, 27.7, 26.8, 26.6, 26.4, 25.3; IR (KBr): 3446, 2925, 2851, 1586, 1464, 1384, 1350, 1243, 1121, 741; ESI FTMS exact mass calcd for  $(\text{C}_{36}\text{H}_{40}\text{BrNO}_2-\text{H})^-$

requires  $m/z$  596.2169, found  $m/z$  596.2205; The enantiomeric ratio: 93:7, determined by HPLC (Daicel Chiralpak AD-3, hexane/ isopropanol = 95/ 5, flow rate 0.8 mL/min, T = 30 °C, 254 nm):  $t_R$  = 5.219 (minor),  $t_R$  = 6.636 (major).

**(*R,R*)-2-((2-(cyclohexyl(cyclohexylidene)methyl)-1-methyl-1H-indol-3-yl)(p-tolyl)methyl) phenol (4ai):**

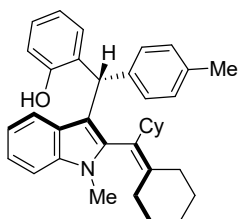

Following the general procedure, 2-alkenylindoles **1a** (61.5 mg, 0.2 mmol), *o*-hydroxybenzyl alcohol **2i** (21.4 mg, 0.1 mmol), CPA (*S*)-**7c** (7.1 mg, 0.01 mmol) and 4 Å MS (100 mg) were added to a reaction tube. Then, *p*-xylene (4 mL) was added to the reaction mixture, which was stirred at 20 °C for 12 h. After the completion of the reaction indicated by TLC, the reaction mixture was purified through flash column chromatography on silica gel (petroleum ether/ethyl acetate = 5:1) to afford pure product **4ai** in 64% yield (32.0 mg) as colorless oil; 67:33 dr;  $[\alpha]_D^{20}$  = +99.5 (c 0.38, acetone); <sup>1</sup>H NMR (400 MHz, CDCl<sub>3</sub>) δ 7.32 – 7.27 (m, 1H), 7.16 – 7.06 (m, 6H), 6.97 (d, *J* = 7.7 Hz, 1H), 6.94 – 6.90 (m, 1H), 6.90 – 6.84 (m, 1H), 6.81 – 6.74 (m, 2H), 5.69 (s, 1H), 5.11 (s, 1H), 3.58 (s, 3H), 2.65 – 2.55 (m, 1H), 2.49 – 2.41 (m, 1H), 2.33 (s, 3H), 2.32 – 2.25 (m, 1H), 1.77 – 1.71 (m, 1H), 1.66 – 1.57 (m, 4H), 1.53 – 1.38 (m, 6H), 1.34 – 1.28 (m, 1H), 1.24 – 1.16 (m, 2H), 1.14 – 1.02 (m, 2H), 0.96 – 0.87 (m, 1H), 0.74 – 0.60 (m, 1H); <sup>13</sup>C NMR (100 MHz, CDCl<sub>3</sub>) δ 154.2, 145.0, 139.9, 139.7, 137.0, 135.7, 130.6, 130.3, 129.2, 129.0, 127.6, 127.5, 126.5, 120.8, 120.6, 120.5, 119.3, 115.8, 111.5, 109.3, 42.6, 41.2, 33.1, 33.0, 31.0, 30.7, 30.5, 28.2, 27.4, 26.8, 26.6, 26.5, 25.7, 21.1; IR (KBr): 3420, 2927, 2851, 1631, 1594, 1384, 1351, 1122, 740; ESI FTMS exact mass calcd for (C<sub>36</sub>H<sub>41</sub>NO-H)<sup>+</sup> requires  $m/z$  502.3115, found  $m/z$  502.3145; The enantiomeric ratio: 91:9, determined by HPLC (Daicel Chiralpak IB, hexane/ isopropanol = 98/ 2, flow rate 0.8 mL/min, T = 30 °C, 254 nm):  $t_R$  = 6.006 (major),  $t_R$  = 7.619 (minor).

**(*R,R*)-2-((2-(cyclohexyl(cyclohexylidene)methyl)-1-methyl-1H-indol-3-yl)(4-methoxyphenyl)methyl)phenol (4am):**

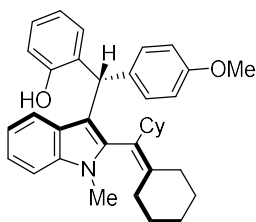

Following the general procedure, 2-alkenylindoles **1a** (61.5 mg, 0.2 mmol), *o*-hydroxybenzyl alcohol **2m** (23.0 mg, 0.1 mmol), CPA (*S*)-**7b** (6.6 mg, 0.01 mmol) and 4 Å MS (100 mg) were added to a reaction tube. Then, *p*-xylene (4 mL) was added to the reaction mixture, which was stirred at 20 °C for 12 h. After the completion of the reaction indicated by TLC, the reaction mixture was purified through flash column chromatography on silica gel (petroleum ether/ethyl acetate = 5:1) to afford pure product **4am** in 92% yield (47.8 mg) as colorless oil; 95:5 dr;  $[\alpha]_D^{20}$  = +144.4 (c 0.45, acetone); <sup>1</sup>H NMR (400 MHz, CDCl<sub>3</sub>) δ 7.29 (d, *J* = 8.2 Hz, 1H), 7.17 – 7.05 (m, 4H), 6.96 (d, *J* = 7.7 Hz, 1H), 6.94 – 6.85 (m, 2H), 6.85 – 6.72 (m, 4H), 5.67 (s, 1H), 5.11 (s, 1H), 3.79 (s, 3H), 3.58 (s, 3H), 2.65 – 2.55 (m, 1H), 2.49 – 2.39 (m, 1H), 2.35 – 2.26 (m, 1H), 1.78 – 1.72 (m, 1H), 1.66 – 1.59 (m, 2H), 1.51 – 1.39 (m, 5H), 1.31 – 1.26 (m, 2H), 1.25 – 1.14 (m, 3H), 1.14 – 1.02 (m, 2H), 0.97 – 0.83 (m, 2H), 0.75 – 0.63 (m, 1H); <sup>13</sup>C NMR (100 MHz, CDCl<sub>3</sub>) δ 158.1, 154.1, 145.0, 139.9, 137.0, 134.9, 130.5, 130.4, 130.3, 127.6, 127.5, 126.4, 120.8, 120.6, 120.5, 119.3, 115.8, 113.7, 111.5, 109.3,

55.4, 42.3, 41.2, 33.1, 33.0, 31.1, 30.7, 30.5, 29.8, 28.2, 27.4, 26.8, 26.7, 26.6, 25.8; IR (KBr): 3446, 2927, 2851, 1585, 1508, 1464, 1351, 1246, 1177, 1038, 741; ESI FTMS exact mass calcd for (C<sub>36</sub>H<sub>41</sub>NO<sub>2</sub>-H)<sup>-</sup> requires m/z 518.3064, found m/z 518.3086; The enantiomeric ratio: 90:10, determined by HPLC (Daicel Chiralpak AD-3, hexane/ isopropanol = 98/ 2, flow rate 1.0 mL/min, T = 30 °C, 254 nm): t<sub>R</sub> = 10.843 (major), t<sub>R</sub> = 18.006 (minor).

**(*R*,*R*)-2-(benzo[d][1,3]dioxol-5-yl(2-(cyclohexyl(cyclohexylidene)methyl)-1-methyl-1H-indol-3-yl)methyl)phenol (4aj):**

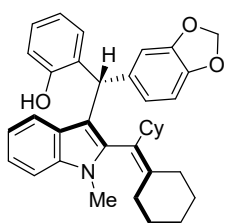

Following the general procedure, 2-alkenylindoles **1a** (61.5 mg, 0.2 mmol), *o*-hydroxybenzyl alcohol **2j** (24.4 mg, 0.1 mmol), CPA (*S*)-**7b** (6.6 mg, 0.01 mmol) and 4 Å MS (100 mg) were added to a reaction tube. Then, *p*-xylene (4 mL) was added to the reaction mixture, which was stirred at 20 °C for 12 h. After the completion of the reaction indicated by TLC, the reaction mixture was purified through flash column chromatography on silica gel (petroleum ether/ethyl acetate = 5:1) to afford pure product **4aj** in 75% yield (40.0 mg) as colorless oil; >95:5 dr; [α]<sub>D</sub><sup>20</sup> = +95.1 (c 0.32, acetone); <sup>1</sup>H NMR (400 MHz, CDCl<sub>3</sub>) δ 7.30 (d, *J* = 8.2 Hz, 1H), 7.17 – 7.08 (m, 2H), 7.02 – 6.95 (m, 2H), 6.93 – 6.87 (m, 1H), 6.82 – 6.75 (m, 3H), 6.74 – 6.67 (m, 2H), 5.94 – 5.89 (m, 2H), 5.66 (s, 1H), 5.09 (s, 1H), 3.59 (s, 3H), 2.67 – 2.57 (m, 1H), 2.49 – 2.39 (m, 1H), 2.36 – 2.27 (m, 1H), 1.82 – 1.75 (m, 1H), 1.60 – 1.46 (m, 6H), 1.45 – 1.31 (m, 3H), 1.29 – 1.09 (m, 4H), 1.04 – 0.91 (m, 2H), 0.83 – 0.73 (m, 1H); <sup>13</sup>C NMR (100 MHz, CDCl<sub>3</sub>) δ 154.1, 147.8, 146.0, 145.1, 140.0, 137.1, 130.6, 130.2, 127.8, 127.5, 126.4, 122.3, 120.9, 120.8, 120.7, 120.6, 119.4, 115.9, 111.6, 110.1, 109.4, 108.0, 100.9, 42.6, 41.3, 33.2, 33.1, 31.3, 30.7, 30.6, 28.3, 27.4, 26.9, 26.8, 26.6, 26.0; IR (KBr): 3443, 2926, 2851, 1647, 1569, 1486, 1465, 1366, 1229, 1040; ESI FTMS exact mass calcd for (C<sub>36</sub>H<sub>39</sub>NO<sub>3</sub>-H)<sup>-</sup> requires m/z 532.2857, found m/z 532.2888; The enantiomeric ratio: 90:10, determined by HPLC (Daicel Chiralpak IB, hexane/ isopropanol = 99/ 1, flow rate 1.0 mL/min, T = 30 °C, 254 nm): t<sub>R</sub> = 10.366 (major), t<sub>R</sub> = 17.443 (minor).

**(*R*,*R*)-2-((2-(cyclohexyl(cyclohexylidene)methyl)-1-methyl-1H-indol-3-yl)(phenyl)methyl) phenol (4ak):**

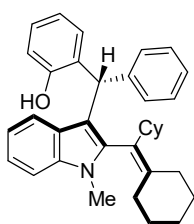

Following the general procedure, 2-alkenylindoles **1a** (61.5 mg, 0.2 mmol), *o*-hydroxybenzyl alcohol **2k** (20 mg, 0.1 mmol), CPA (*S*)-**7c** (7.1 mg, 0.01 mmol) and 4 Å MS (100 mg) were added to a reaction tube. Then, *p*-xylene (4 mL) was added to the reaction mixture, which was stirred at 20 °C for 12 h. After the completion of the reaction indicated by TLC, the reaction mixture was purified through flash column chromatography on silica gel (petroleum ether/ethyl acetate = 5:1) to afford pure product **4ak** in 96% yield (47.0 mg) as white solid; m.p. 97-98 °C; >95:5 dr; [α]<sub>D</sub><sup>20</sup> = +143.2 (c 0.49, acetone); <sup>1</sup>H NMR (400 MHz, CDCl<sub>3</sub>) δ 7.38 – 7.32 (m, 2H), 7.31 – 7.25 (m, 4H), 7.22 – 7.12 (m, 2H), 7.00 (d, *J* = 7.7 Hz, 1H), 6.97 – 6.88 (m, 2H), 6.87 – 6.79 (m, 2H), 5.78 (s, 1H), 5.14 (s, 1H), 3.64 (s, 3H), 2.70 – 2.59 (m, 1H), 2.56 – 2.47 (m, 1H), 2.39 – 2.31 (m, 1H), 1.85 – 1.76 (m, 1H), 1.70 – 1.62 (m, 3H), 1.62 – 1.55 (m, 3H), 1.54 – 1.44 (m, 4H), 1.34 – 1.23 (m, 3H), 1.22 – 1.14 (m, 2H), 1.00 – 0.91 (m, 1H), 0.77 – 0.61 (m, 1H); <sup>13</sup>C NMR (100 MHz, CDCl<sub>3</sub>) δ 154.2, 145.0, 142.9, 140.1, 137.0,

130.6, 130.1, 129.3, 128.3, 127.7, 127.5, 126.5, 126.3, 120.9, 120.6, 119.4, 115.9, 111.2, 109.3, 43.1, 41.3, 33.1, 33.0, 31.0, 30.7, 30.5, 28.2, 27.4, 26.8, 26.6, 25.8; IR (KBr): 3444, 2926, 2851, 1668, 1583, 1466, 1388, 1265, 741; ESI FTMS exact mass calcd for (C<sub>35</sub>H<sub>39</sub>NO-H)<sup>-</sup> requires m/z 488.2959, found m/z 488.2987; The enantiomeric ratio: 90:10, determined by HPLC (Daicel Chiralpak OD-3, hexane/ isopropanol = 98/ 2, flow rate 0.8 mL/min, T = 30 °C, 254 nm): t<sub>R</sub> = 5.839 (minor), t<sub>R</sub> = 10.556 (major).

**(*R<sub>a</sub>,R*)-2-((2-(cyclohexyl(cyclohexylidene)methyl)-1-methyl-1H-indol-3-yl)(3-methoxyphenyl) methyl)-4-methoxyphenol (4af):**

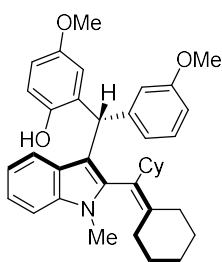

Following the general procedure, 2-alkenylindoles **1a** (61.5 mg, 0.2 mmol), *o*-hydroxybenzyl alcohol **2f** (26.0 mg, 0.1 mmol), CPA (*S*)-**7b** (6.6 mg, 0.01 mmol) and 4 Å MS (100 mg) were added to a reaction tube. Then, *p*-xylene (4 mL) was added to the reaction mixture, which was stirred at 20 °C for 12 h. After the completion of the reaction indicated by TLC, the reaction mixture was purified through flash column chromatography on silica gel (petroleum ether/ethyl acetate = 5:1) to afford pure product **4af** in 95% yield (52.2 mg) as colorless oil; 86:14 dr; [α]<sub>D</sub><sup>20</sup> = +135.7 (c 0.58, acetone);

<sup>1</sup>H NMR (400 MHz, CDCl<sub>3</sub>) δ 7.32 – 7.26 (m, 1H), 7.21 – 7.15 (m, 1H), 7.14 – 7.10 (m, 1H), 6.97 (d, *J* = 8.0 Hz, 1H), 6.89 – 6.82 (m, 2H), 6.81 – 6.75 (m, 2H), 6.72 – 6.64 (m, 2H), 6.58 (s, 1H), 5.65 (s, 1H), 4.76 (s, 1H), 3.68 (s, 3H), 3.59 (s, 3H), 3.57 (s, 3H), 2.63 – 2.55 (m, 1H), 2.48 – 2.41 (m, 1H), 2.36 – 2.28 (m, 1H), 1.78 – 1.71 (m, 1H), 1.66 – 1.60 (m, 2H), 1.57 – 1.39 (m, 8H), 1.25 – 1.04 (m, 5H), 0.94 – 0.87 (m, 1H), 0.74 – 0.61 (m, 1H); <sup>13</sup>C NMR (100 MHz, CDCl<sub>3</sub>) δ 159.8, 153.6, 148.2, 145.0, 144.4, 140.0, 137.0, 131.3, 129.3, 127.4, 126.5, 121.9, 120.9, 120.5, 119.4, 116.6, 116.5, 115.2, 112.3, 111.7, 111.1, 109.3, 55.6, 55.2, 43.3, 41.3, 33.1, 33.0, 31.0, 30.7, 30.5, 28.2, 27.4, 26.8, 26.6, 25.8; IR (KBr): 3482, 2926, 2851, 1659, 1488, 1466, 1365, 1264, 1203, 1045, 742; ESI FTMS exact mass calcd for (C<sub>37</sub>H<sub>43</sub>NO<sub>3</sub>-H)<sup>-</sup> requires m/z 548.3170, found m/z 548.3189; The enantiomeric ratio: 93:7, determined by HPLC (Daicel Chiralpak AD-3, hexane/ isopropanol = 95/ 5, flow rate 1.0 mL/min, T = 30 °C, 254 nm): t<sub>R</sub> = 6.516 (minor), t<sub>R</sub> = 8.979 (major).

**(*R<sub>a</sub>,R*)-2-((2-(cyclohexyl(cyclohexylidene)methyl)-1-methyl-1H-indol-3-yl)(4-methoxyphenyl) methyl)-4-methoxyphenol (4ah):**

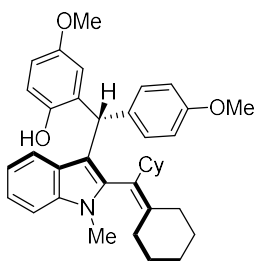

Following the general procedure, 2-alkenylindoles **1a** (61.5 mg, 0.2 mmol), *o*-hydroxybenzyl alcohol **2h** (26.0 mg, 0.1 mmol), CPA (*S*)-**7b** (6.6 mg, 0.01 mmol) and 4 Å MS (100 mg) were added to a reaction tube. Then, *p*-xylene (4 mL) was added to the reaction mixture, which was stirred at 20 °C for 12 h. After the completion of the reaction indicated by TLC, the reaction mixture was purified through flash column chromatography on silica gel (petroleum ether/ethyl acetate = 5:1) to afford pure product **4ah** in 92% yield (50.6 mg) as colorless oil; 91:9 dr; [α]<sub>D</sub><sup>20</sup> = +152.1 (c 0.36, acetone); <sup>1</sup>H NMR (400 MHz, CDCl<sub>3</sub>) δ 7.26 – 7.23 (m, 1H), 7.13 – 7.04 (m, 3H), 6.98 (d, *J* = 8.0 Hz, 1H), 6.88 – 6.83 (m, 1H), 6.80 –

6.69 (m, 4H), 6.67 – 6.61 (m, 1H), 5.49 (s, 1H), 4.63 (s, 1H), 3.74 (s, 3H), 3.57 (s, 3H), 3.55 (s, 3H), 2.64 – 2.54 (m, 1H), 2.51 – 2.42 (m, 1H), 2.32 – 2.23 (m, 1H), 1.72 – 1.61 (m, 4H), 1.55 – 1.51 (m, 2H), 1.47 – 1.37 (m, 4H), 1.33 – 1.27 (m, 2H), 1.16 – 1.08 (m, 2H), 1.07 – 1.00 (m, 1H), 0.91 – 0.81 (m, 1H), 0.80 – 0.73 (m, 1H), 0.65 – 0.56 (m, 1H);  $^{13}\text{C}$  NMR (100 MHz,  $\text{CDCl}_3$ )  $\delta$  158.1, 153.7, 148.1, 144.2, 139.7, 136.9, 134.7, 131.5, 129.9, 127.4, 126.7, 120.7, 120.4, 119.2, 116.7, 116.6, 113.9, 112.4, 111.7, 109.2, 55.7, 55.3, 43.3, 41.1, 33.1, 32.8, 30.6, 30.4, 28.3, 27.8, 26.9, 26.7, 26.6, 25.7; IR (KBr): 2927, 2852, 2769, 1489, 1464, 1372, 1243, 1030, 804, 740; ESI FTMS exact mass calcd for  $(\text{C}_{37}\text{H}_{43}\text{NO}_3\text{-H})^-$  requires  $m/z$  548.3170, found  $m/z$  548.3178; The enantiomeric ratio: 90:10, determined by HPLC (Daicel Chiralpak AD-3, hexane/ isopropanol = 98/ 2, flow rate 1.0 mL/min, T = 30 °C, 254 nm):  $t_R$  = 10.633 (minor),  $t_R$  = 17.606 (major).

**(*R<sub>a</sub>,R*)-2-((2-(cyclohexyl(cyclohexylidene)methyl)-5-fluoro-1-methyl-1H-indol-3-yl)(2-methoxyphenyl)methyl)-4-methoxyphenol (4ba):**

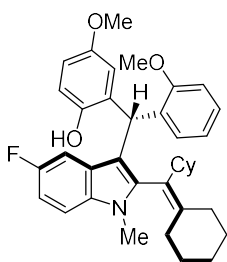

Following the general procedure, 2-alkenylindoles **1b** (65.1 mg, 0.2 mmol), *o*-hydroxybenzyl alcohol **2a** (26.0 mg, 0.1 mmol), CPA (*S*)-**7b** (6.6 mg, 0.01 mmol) and 4 Å MS (100 mg) were added to a reaction tube. Then, *p*-xylene (4 mL) was added to the reaction mixture, which was stirred at 20 °C for 12 h. After the completion of the reaction indicated by TLC, the reaction mixture was purified through flash column chromatography on silica gel (petroleum ether/ethyl acetate = 5:1) to afford pure product **4ba** in 73% yield (41.4 mg) as colorless oil; >95:5 dr;  $[\alpha]_D^{20}$  = +15.4 (c 0.26, acetone);

$^1\text{H}$  NMR (400 MHz,  $\text{CDCl}_3$ )  $\delta$  7.23 (d,  $J$  = 7.9 Hz, 1H), 7.19 – 7.13 (m, 1H), 7.07 (d,  $J$  = 7.6 Hz, 1H), 6.89 – 6.79 (m, 3H), 6.70 – 6.62 (m, 2H), 6.59 (d,  $J$  = 10.4 Hz, 1H), 6.38 (s, 1H), 5.72 (s, 1H), 4.92 (s, 1H), 3.69 (s, 3H), 3.65 (s, 3H), 3.56 (s, 3H), 2.56 – 2.46 (m, 1H), 2.43 – 2.34 (m, 1H), 2.32 – 2.24 (m, 1H), 1.80 – 1.69 (m, 3H), 1.57 – 1.48 (m, 3H), 1.45 – 1.40 (m, 1H), 1.37 – 1.24 (m, 4H), 1.22 – 1.16 (m, 1H), 1.11 – 0.81 (m, 4H), 0.69 – 0.58 (m, 1H), 0.29 – 0.15 (m, 1H);  $^{13}\text{C}$  NMR (100 MHz,  $\text{CDCl}_3$ )  $\delta$  157.6 (d,  $J$  = 232.2 Hz), 156.9, 153.3, 148.8, 144.6, 141.9, 133.4, 130.7, 130.6, 130.5, 128.2, 128.1, 126.8, 120.6, 116.3, 115.6, 112.1, 110.5, 109.8, 109.7, 109.3 (d,  $J$  = 26.4 Hz), 105.3 (d,  $J$  = 24.3 Hz), 55.6, 55.4, 41.4, 38.0, 33.2, 31.8, 30.7, 30.6, 29.9, 28.0, 27.7, 26.8, 26.6, 26.4, 25.3;  $^{19}\text{F}$  NMR (376 MHz,  $\text{CDCl}_3$ )  $\delta$  -124.0; IR (KBr): 2854, 2603, 1596, 1489, 1369, 1242, 933; ESI FTMS exact mass calcd for  $(\text{C}_{37}\text{H}_{42}\text{FNO}_3\text{-H})^-$  requires  $m/z$  566.3076, found  $m/z$  566.3104; The enantiomeric ratio: 94:6, determined by HPLC (Daicel Chiralpak OD-3, hexane/ isopropanol = 98/ 2, flow rate 0.8 mL/min, T = 30 °C, 254 nm):  $t_R$  = 7.479 (minor),  $t_R$  = 11.263 (major).

**(*R<sub>a</sub>,R*)-2-((5-chloro-2-(cyclohexyl(cyclohexylidene)methyl)-1-methyl-1H-indol-3-yl)(2-methoxyphenyl)methyl)-4-methoxyphenol (4ca):**

Following the general procedure, 2-alkenylindoles **1c** (68.4 mg, 0.2 mmol), *o*-hydroxybenzyl alcohol **2a** (26.0 mg, 0.1 mmol), CPA (*S*)-**7b** (6.6 mg, 0.01 mmol) and 4 Å MS (100 mg) were added to a reaction tube. Then, *p*-xylene (4 mL) was added to the reaction mixture, which was stirred at 20 °C for 12 h. After the completion of

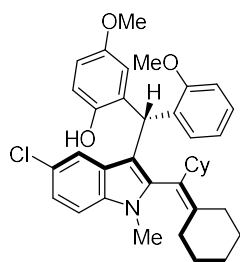

the reaction indicated by TLC, the reaction mixture was purified through flash column chromatography on silica gel (petroleum ether/ethyl acetate = 5:1) to afford pure product **4ca** in 84% yield (49.2 mg) as colorless oil; >95:5 dr;  $[\alpha]_D^{20} = +10.6$  (c 0.21, acetone);  $^1\text{H NMR}$  (400 MHz,  $\text{CDCl}_3$ )  $\delta$  7.26 – 7.21 (m, 1H), 7.20 – 7.14 (m, 1H), 7.06 (d,  $J = 8.8$  Hz, 2H), 6.90 – 6.81 (m, 3H), 6.72 – 6.64 (m, 2H), 6.40 (s, 1H), 5.73 (s, 1H), 4.85 (s, 1H), 3.68 (s, 3H), 3.65 (s, 3H), 3.55 (s, 3H), 2.56 – 2.47 (m, 1H), 2.43 – 2.35 (m, 1H), 2.32 – 2.24 (m, 1H), 1.78 – 1.68 (m, 3H), 1.57 – 1.49 (m, 3H), 1.41 – 1.24 (m, 5H), 1.21 – 1.16 (m, 1H), 1.10 – 0.84 (m, 4H), 0.70 – 0.59 (m, 1H), 0.31 – 0.19 (m, 1H);  $^{13}\text{C NMR}$  (100 MHz,  $\text{CDCl}_3$ )  $\delta$  156.9, 153.4, 148.7, 144.7, 141.5, 135.2, 130.6, 130.4, 128.9, 128.2, 126.6, 125.1, 121.3, 120.7, 119.6, 116.3, 115.7, 112.4, 110.5, 110.3, 109.7, 55.8, 55.4, 41.4, 38.0, 33.2, 31.9, 30.6, 30.6, 29.9, 28.0, 27.7, 26.8, 26.6, 26.4, 25.4; IR (KBr): 3456, 2926, 1652, 1578, 1383, 1350, 1266, 1119, 741; ESI FTMS exact mass calcd for  $(\text{C}_{37}\text{H}_{42}\text{ClNO}_3\text{-H})^-$  requires  $m/z$  582.2780, found  $m/z$  582.2796; The enantiomeric ratio: 91:9, determined by HPLC (Daicel Chiralpak AD-3, hexane/ isopropanol = 98/ 2, flow rate 1.0 mL/min, T = 30 °C, 254 nm):  $t_R = 16.223$  (minor),  $t_R = 18.173$  (major).

**(*R,R*)-2-((5-chloro-2-(cyclohexyl(cyclohexylidene)methyl)-1-methyl-1H-indol-3-yl)(p-tolyl)methyl)phenol (4ci):**

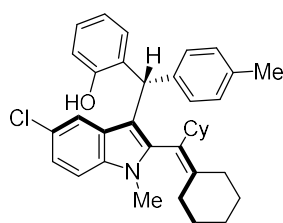

Following the general procedure, 2-alkenylindoles **1c** (68.4 mg, 0.2 mmol), *o*-hydroxybenzyl alcohol **2i** (21.4 mg, 0.1 mmol), CPA (*S*)-**7c** (7.1 mg, 0.01 mmol) and 4 Å MS (100 mg) were added to a reaction tube. Then, mesitylene (4 mL) was added to the reaction mixture, which was stirred at -30 °C for 12 h. After the completion of the reaction indicated by TLC, the reaction mixture was purified through flash column chromatography on silica gel (petroleum ether/ethyl acetate = 5:1) to afford pure product **4ci** in 60% yield (32.3 mg) as colorless oil; 93:7 dr;  $[\alpha]_D^{20} = +147.9$  (c 0.33, acetone);  $^1\text{H NMR}$  (400 MHz,  $\text{CDCl}_3$ )  $\delta$  7.21 – 7.16 (m, 1H), 7.15 – 7.01 (m, 6H), 6.95 – 6.89 (m, 1H), 6.85 (s, 1H), 6.82 – 6.73 (m, 2H), 5.67 (s, 1H), 4.89 (s, 1H), 3.55 (s, 3H), 2.62 – 2.56 (m, 1H), 2.45 – 2.37 (m, 1H), 2.34 (s, 3H), 2.31 – 2.27 (m, 1H), 1.79 – 1.70 (m, 1H), 1.64 – 1.53 (m, 5H), 1.49 – 1.39 (m, 4H), 1.31 – 1.23 (m, 2H), 1.22 – 1.07 (m, 3H), 1.01 – 0.86 (m, 2H), 0.76 – 0.65 (m, 1H);  $^{13}\text{C NMR}$  (100 MHz,  $\text{CDCl}_3$ )  $\delta$  153.8, 145.3, 141.3, 139.3, 136.0, 135.3, 130.5, 129.9, 129.1, 129.0, 128.6, 127.8, 126.2, 124.9, 121.0, 120.7, 119.9, 115.8, 111.8, 110.2, 42.1, 41.2, 33.1, 31.0, 30.8, 30.5, 28.2, 27.3, 26.8, 26.6, 26.5, 25.7, 21.1; IR (KBr): 3436, 2927, 2852, 1699, 1586, 1455, 1389, 1265, 751; ESI FTMS exact mass calcd for  $(\text{C}_{36}\text{H}_{40}\text{ClNO}+\text{Na})^+$  requires  $m/z$  560.2691 found  $m/z$  560.2701; The enantiomeric ratio: 95:5, determined by HPLC (Daicel Chiralpak OD-3, hexane/ isopropanol = 98/ 2, flow rate 1.0 mL/min, T = 30 °C, 254 nm):  $t_R = 5.236$  (minor),  $t_R = 8.196$  (major).

**(*R,R*)-2-((5-bromo-2-(cyclohexyl(cyclohexylidene)methyl)-1-methyl-1H-indol-3-yl)(2-methoxyphenyl)methyl)-4-methoxyphenol (4da):**



Following the general procedure, 2-alkenylindoles **1d** (77.3 mg, 0.2 mmol), *o*-hydroxybenzyl alcohol **2a** (26.0 mg, 0.1 mmol), CPA (*S*)-**7b** (6.6 mg, 0.01 mmol) and 4 Å MS (100 mg) were added to

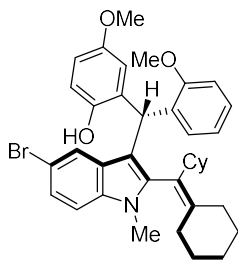

a reaction tube. Then, *p*-xylene (4 mL) was added to the reaction mixture, which was stirred at 20 °C for 12 h. After the completion of the reaction indicated by TLC, the reaction mixture was purified through flash column chromatography on silica gel (petroleum ether/ethyl acetate = 5:1) to afford pure product **4da** in 99% yield (62.4 mg) as colorless oil; >95:5 dr;  $[\alpha]_D^{20} = +18.5$  (c 1.14, acetone);  $^1\text{H NMR}$  (400 MHz,  $\text{CDCl}_3$ )

$\delta$  7.26 – 7.22 (m, 1H), 7.21 – 7.18 (m, 1H), 7.14 – 7.12 (m, 1H), 7.08 – 7.02 (m, 2H), 6.90 – 6.82 (m, 2H), 6.68 (s, 2H), 6.41 (s, 1H), 5.74 (s, 1H), 4.84 (s, 1H), 3.68 (s, 3H), 3.66 (s, 3H), 3.55 (s, 3H), 2.54 – 2.48 (m, 1H), 2.43 – 2.37 (m, 1H), 2.32 – 2.25 (m, 1H), 1.77 – 1.69 (m, 3H), 1.57 – 1.47 (m, 3H), 1.41 – 1.15 (m, 6H), 1.12 – 0.85 (m, 4H), 0.70 – 0.61 (m, 1H), 0.31 – 0.21 (m, 1H);  $^{13}\text{C NMR}$  (100 MHz,  $\text{CDCl}_3$ )  $\delta$  156.9, 153.4, 148.7, 144.8, 141.4, 135.4, 130.6, 130.4, 129.6, 128.2, 126.6, 123.9, 122.7, 120.7, 116.4, 115.8, 112.8, 112.5, 110.8, 110.5, 109.8, 55.9, 55.4, 41.4, 38.0, 33.2, 31.9, 30.6, 29.9, 28.0, 27.7, 26.8, 26.6, 26.4, 25.4; IR (KBr): 2962, 2921, 2850, 1770, 1759, 1654, 1470, 1377, 1246, 1096, 1050, 801; ESI FTMS exact mass calcd for  $(\text{C}_{37}\text{H}_{42}\text{BrNO}_3\text{-H})^-$  requires  $m/z$  626.2275, found  $m/z$  626.2307; The enantiomeric ratio: 91:9, determined by HPLC (Daicel Chiralpak AD-3, hexane/ isopropanol = 98/ 2, flow rate 1.0 mL/min, T = 30 °C, 254 nm):  $t_R$  = 8.229 (minor),  $t_R$  = 9.969 (major).

**(*R<sub>a</sub>,R*)-2-((5-bromo-2-(cyclohexyl(cyclohexylidene)methyl)-1-methyl-1H-indol-3-yl)(*p*-tolyl)methyl)phenol (4di):**

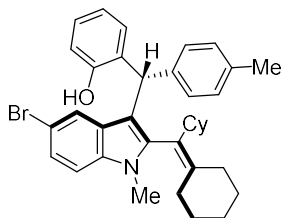

Following the general procedure, 2-alkenylindoles **1d** (77.3 mg, 0.2 mmol), *o*-hydroxybenzyl alcohol **2i** (21.4 mg, 0.1 mmol), CPA (*S*)-**7c** (7.1 mg, 0.01 mmol) and 4 Å MS (100 mg) were added to a reaction tube. Then, mesitylene (4 mL) was added to the reaction mixture, which was stirred at -30 °C for 12 h. After the completion of the reaction indicated by TLC, the reaction mixture was purified through flash column chromatography on silica gel (petroleum ether/ethyl acetate =

5:1) to afford pure product **4di** in 52% yield (30.3 mg) as colorless oil; 93:7 dr;  $[\alpha]_D^{20} = +16.8$  (c 0.43, acetone);  $^1\text{H NMR}$  (400 MHz,  $\text{CDCl}_3$ )  $\delta$  7.23 – 7.18 (m, 1H), 7.17 – 7.04 (m, 6H), 7.01 (s, 1H), 6.95 – 6.90 (m, 1H), 6.84 – 6.74 (m, 2H), 5.68 (s, 1H), 4.89 (s, 1H), 3.55 (s, 3H), 2.61 – 2.56 (m, 1H), 2.45 – 2.37 (m, 1H), 2.37 – 2.33 (m, 3H), 2.31 – 2.27 (m, 1H), 1.78 – 1.71 (m, 1H), 1.63 – 1.55 (m, 5H), 1.49 – 1.39 (m, 4H), 1.31 – 1.24 (m, 2H), 1.22 – 1.08 (m, 3H), 1.00 – 0.85 (m, 2H), 0.78 – 0.66 (m, 1H);  $^{13}\text{C NMR}$  (100 MHz,  $\text{CDCl}_3$ )  $\delta$  153.8, 145.3, 141.1, 139.2, 136.0, 135.6, 130.5, 129.8, 129.2, 129.1, 129.0, 127.8, 126.1, 123.6, 122.9, 120.7, 115.8, 112.6, 111.7, 110.7, 42.1, 41.2, 33.1, 31.0, 30.8, 30.5, 28.2, 27.3, 26.8, 26.6, 26.5, 25.7, 21.1; IR (KBr): 2926, 2851, 1631, 1508, 1456, 1382, 1351, 1264, 1120, 826; ESI FTMS exact mass calcd for  $(\text{C}_{36}\text{H}_{40}\text{BrNO-H})^-$  requires  $m/z$  580.2220, found  $m/z$  580.2229; The enantiomeric ratio: 95:5, determined by HPLC (Daicel Chiralpak OD-3, hexane/ isopropanol = 98/ 2, flow rate 1.0 mL/min, T = 30 °C, 254 nm):  $t_R$  = 5.316 (minor),  $t_R$  = 7.983 (major).

**(*R,R*)-2-((2-(cyclohexyl(cyclohexylidene)methyl)-6-methoxy-1-methyl-1H-indol-3-yl)(2-methoxyphenyl)methyl)-4-methoxyphenol (4ha):**

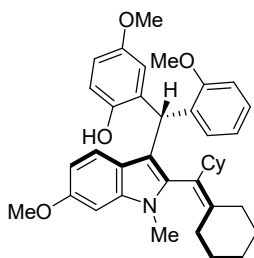

Following the general procedure, 2-alkenylindoles **1f** (67.5 mg, 0.2 mmol), *o*-hydroxybenzyl alcohol **2a** (26.0 mg, 0.1 mmol), CPA (*S*)-**7b** (6.6 mg, 0.01 mmol) and 4 Å MS (100 mg) were added to a reaction tube. Then, *p*-xylene (4 mL) was added to the reaction mixture, which was stirred at 20 °C for 12 h. After the completion of the reaction indicated by TLC, the reaction mixture was purified through flash column chromatography on silica gel (petroleum ether/ethyl acetate = 5:1) to afford pure product **4ha** in 53% yield (30.7 mg) as colorless oil; 94:6 dr;  $[\alpha]_D^{20} = +65.3$  (c 0.17, acetone);  $^1\text{H NMR}$  (400 MHz,  $\text{CDCl}_3$ )  $\delta$  7.16 – 7.11 (m, 1H), 7.04 (d,  $J = 7.6$  Hz, 1H), 6.84 (d,  $J = 8.3$  Hz, 1H), 6.77 – 6.69 (m, 5H), 6.55 (d,  $J = 8.7$  Hz, 1H), 6.33 (s, 1H), 6.08 (s, 1H), 5.24 (s, 1H), 3.84 (s, 3H), 3.73 (s, 3H), 3.64 (s, 3H), 3.49 (s, 3H), 2.72 – 2.64 (m, 1H), 2.43 – 2.36 (m, 1H), 2.11 – 2.04 (m, 1H), 1.91 – 1.85 (m, 1H), 1.81 – 1.65 (m, 5H), 1.50 – 1.45 (m, 2H), 1.40 – 1.28 (m, 3H), 1.16 – 1.09 (m, 2H), 1.03 – 0.97 (m, 1H), 0.89 – 0.84 (m, 1H), 0.71 – 0.62 (m, 1H), 0.59 – 0.51 (m, 1H);  $^{13}\text{C NMR}$  (100 MHz,  $\text{CDCl}_3$ )  $\delta$  156.7, 155.8, 153.3, 149.6, 145.0, 139.9, 137.6, 131.2, 131.1, 131.0, 127.4, 125.8, 122.2, 120.8, 120.7, 116.4, 115.8, 111.6, 110.4, 109.8, 109.0, 93.2, 55.6, 55.5, 55.4, 41.7, 36.8, 33.7, 32.4, 31.2, 30.8, 30.4, 28.1, 27.3, 27.0, 26.9, 26.5, 25.9; IR (KBr): 3420, 2926, 2851, 2715, 1628, 1489, 1382, 1350, 1243, 1117, 1043, 785; ESI FTMS exact mass calcd for ( $\text{C}_{38}\text{H}_{45}\text{NO}_4\text{-H}$ ) $^-$  requires  $m/z$  578.3276, found  $m/z$  578.3315; The enantiomeric ratio: 93:7, determined by HPLC (Daicel Chiralpak OD-3, hexane/ isopropanol = 98/ 2, flow rate 1.0 mL/min, T = 30 °C, 254 nm):  $t_R = 16.396$  (minor),  $t_R = 20.039$  (major).

**(*R,R*)-2-((1-benzyl-2-(cyclohexyl(cyclohexylidene)methyl)-1H-indol-3-yl)(*p*-tolyl) methyl)phenol (4ei):**

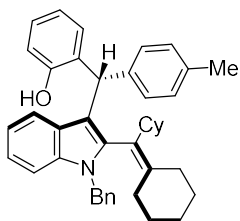

Following the general procedure, 2-alkenylindoles **1e** (76.7 mg, 0.2 mmol), *o*-hydroxybenzyl alcohol **2i** (21.4 mg, 0.1 mmol), CPA (*S*)-**7c** (7.1 mg, 0.01 mmol) and 4 Å MS (100 mg) were added to a reaction tube. Then, *p*-xylene (4 mL) was added to the reaction mixture, which was stirred at 20 °C for 12 h. After the completion of the reaction indicated by TLC, the reaction mixture was purified through flash column chromatography on silica gel (petroleum ether/ethyl acetate = 5:1) to afford pure product **4ei** in 58% yield (33.6 mg) as colorless oil; 67:33 dr;  $[\alpha]_D^{20} = +100.1$  (c 0.25, acetone);  $^1\text{H NMR}$  (400 MHz,  $\text{CDCl}_3$ )  $\delta$  7.32 – 7.27 (m, 1H), 7.26 – 7.19 (m, 2H), 7.18 – 6.96 (m, 10H), 6.95 – 6.90 (m, 1H), 6.88 – 6.75 (m, 3H), 5.70 (s, 1H), 5.33 – 5.17 (m, 2H), 5.07 (s, 1H), 2.55 – 2.46 (m, 1H), 2.33 (s, 3H), 2.32 – 2.19 (m, 2H), 1.70 – 1.63 (m, 1H), 1.54 – 1.40 (m, 7H), 1.36 – 1.31 (m, 2H), 1.28 – 1.24 (m, 1H), 1.18 – 0.90 (m, 4H), 0.88 – 0.80 (m, 2H), 0.76 – 0.67 (m, 1H);  $^{13}\text{C NMR}$  (100 MHz,  $\text{CDCl}_3$ )  $\delta$  154.1, 146.0, 140.5, 139.6, 137.8, 136.7, 135.8, 130.6, 130.0, 129.1, 128.5, 127.9, 127.7, 127.0, 126.5, 126.2, 120.9, 120.7, 120.6, 119.4, 115.9, 112.3, 110.9, 48.1, 42.7, 41.5, 33.4, 32.9, 31.4, 30.7, 28.1, 27.4, 26.9, 26.7, 26.4, 25.8, 21.1; IR (KBr): 2924, 2853, 1748, 1508, 1456, 1363, 1262, 741; ESI FTMS exact mass calcd for ( $\text{C}_{42}\text{H}_{45}\text{NO}+\text{Na}$ ) $^+$  requires  $m/z$  602.3393, found  $m/z$

602.3404; The enantiomeric ratio: 95:5, determined by HPLC (Daicel Chiralpak OD-3, hexane/ isopropanol = 98/ 2, flow rate 1.0 mL/min, T = 30 °C, 254 nm):  $t_R$  = 5.336 (minor),  $t_R$  = 6.133 (major).

**(*R,R*)-2-((2-(cyclopentyl(cyclopentylidene)methyl)-1-methyl-1H-indol-3-yl)(2-methoxyphenyl)methyl)-4-methoxyphenol (4fa):**

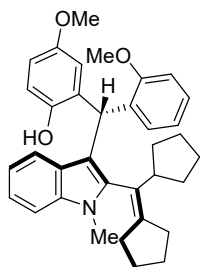

Following the general procedure, 2-alkenylindoles **1f** (55.9 mg, 0.2 mmol), *o*-hydroxybenzyl alcohol **2a** (26.0 mg, 0.1 mmol), CPA (*R*)-**6b** (7.1 mg, 0.01 mmol) and 4 Å MS (100 mg) were added to a reaction tube. Then, *p*-xylene (4 mL) was added to the reaction mixture, which was stirred at 20 °C for 12 h. After the completion of the reaction indicated by TLC, the reaction mixture was purified through flash column chromatography on silica gel (petroleum ether/ethyl acetate = 5:1) to afford pure product **4fa** in 60% yield (31.3 mg) as colorless oil; 75:25 dr;  $[\alpha]_D^{20}$  = +4.9 (c 0.35, acetone);  $^1\text{H NMR}$  (400 MHz,  $\text{CDCl}_3$ )  $\delta$  7.32 – 7.26 (m, 1H), 7.23 – 7.16 (m, 1H), 7.16 – 7.08 (m, 2H), 6.95 – 6.90 (m, 1H), 6.89 – 6.82 (m, 2H), 6.81 – 6.75 (m, 1H), 6.70 – 6.61 (m, 2H), 6.41 (s, 1H), 5.79 (s, 1H), 3.69 (s, 3H), 3.65 (s, 3H), 3.54 (s, 3H), 2.74 – 2.62 (m, 1H), 2.53 – 2.39 (m, 2H), 2.03 – 1.95 (m, 1H), 1.84 – 1.61 (m, 5H), 1.51 – 1.39 (m, 2H), 1.24 – 1.16 (m, 2H), 1.09 – 0.97 (m, 2H), 0.91 – 0.84 (m, 1H), 0.82 – 0.69 (m, 1H);  $^{13}\text{C NMR}$  (100 MHz,  $\text{CDCl}_3$ )  $\delta$  156.9, 153.2, 149.3, 149.0, 140.9, 136.8, 131.1, 131.0, 130.6, 127.9, 127.8, 124.9, 121.1, 120.6, 120.3, 119.5, 116.4, 115.6, 111.9, 110.5, 109.3, 55.6, 55.4, 45.0, 38.2, 32.8, 30.7, 30.6, 30.0, 29.8, 26.5, 26.2, 24.6, 24.3. IR (KBr): 3648, 2935, 2866, 1598, 1489, 1465, 1243, 1206, 1030, 741; ESI FTMS exact mass calcd for  $(\text{C}_{35}\text{H}_{39}\text{NO}_3\text{-H})^-$  requires  $m/z$  520.2857, found  $m/z$  520.2881; The enantiomeric ratio: 85:15, determined by HPLC (Daicel Chiralpak AD-3, hexane/ isopropanol = 98/ 2, flow rate 1.0 mL/min, T = 30 °C, 254 nm):  $t_R$  = 17.805 (major),  $t_R$  = 21.058 (minor).

**(*R,R*)-2-((2-(2,4-dimethylpent-2-en-3-yl)-1-methyl-1H-indol-3-yl)(2-methoxyphenyl)methyl)-4-methoxyphenol (4ga):**

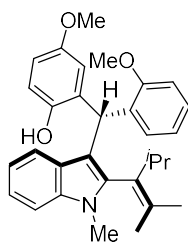

Following the general procedure, 2-alkenylindoles **1g** (68.2 mg, 0.3 mmol), *o*-hydroxybenzyl alcohol **2a** (26.0 mg, 0.1 mmol), CPA (*R*)-**6b** (7.1 mg, 0.01 mmol) and 4 Å MS (100 mg) were added to a reaction tube. Then, mesitylene (4 mL) was added to the reaction mixture, which was stirred at 0 °C for 24 h. After the completion of the reaction indicated by TLC, the reaction mixture was purified through flash column chromatography on silica gel (petroleum ether/ethyl acetate = 5:1) to afford pure product **4ga** in 53% yield (24.9 mg) as colorless oil; >95:5 dr;  $[\alpha]_D^{20}$  = +74.5 (c 0.36, acetone);  $^1\text{H NMR}$  (400 MHz,  $\text{CDCl}_3$ )  $\delta$  7.32 – 7.27 (m, 1H), 7.26 – 7.21 (m, 1H), 7.21 – 7.12 (m, 2H), 7.04 (d,  $J$  = 8.0 Hz, 1H), 6.91 – 6.80 (m, 3H), 6.70 – 6.62 (m, 2H), 6.46 (s, 1H), 5.78 (s, 1H), 5.01 (s, 1H), 3.67 (s, 3H), 3.65 (s, 3H), 3.54 (s, 3H), 2.91 – 2.79 (m, 1H), 1.93 (s, 3H), 1.41 (s, 3H), 0.88 (d,  $J$  = 6.8 Hz, 3H), 0.60 (d,  $J$  = 6.7 Hz, 3H);  $^{13}\text{C NMR}$  (100 MHz,  $\text{CDCl}_3$ )  $\delta$  157.0, 153.2, 148.8, 139.8, 137.1, 136.9, 131.1, 130.9, 130.5, 130.4, 127.9, 127.8, 121.1, 120.5, 119.5, 116.3, 115.6, 111.9, 110.5, 110.1, 109.3, 55.6, 55.3, 38.5, 31.4, 30.1, 23.1, 21.6, 20.2, 20.1. IR (KBr): 3451, 2922, 2852, 1633, 1468, 1263, 1097,

743; ESI FTMS exact mass calcd for  $(C_{31}H_{35}NO_3-H)^-$  requires  $m/z$  468.2544, found  $m/z$  468.2538; The enantiomeric ratio: 92:8, determined by HPLC (Daicel Chiralpak AD-3, hexane/ isopropanol = 98/ 2, flow rate 1.0 mL/min, T = 30 °C, 254 nm):  $t_R$  = 9.836 (minor),  $t_R$  = 11.179 (major).

## 7. Procedure for one-mmol-scale synthesis of product **3aa** and **4aa**

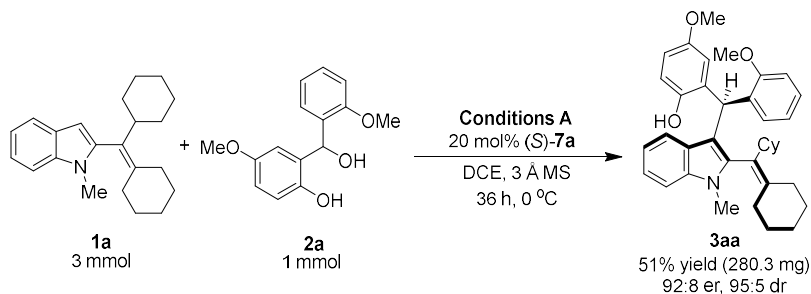

2-Alkenylindoles **1a** (3 mmol), *o*-hydroxybenzyl alcohols **2a** (1 mmol), CPA (*S*)-**7a** (0.2 mmol) and 3 Å MS (1.0 g) were added to a reaction bottle. Then, DCE (20 mL) was added to the reaction mixture, which was stirred at 0 °C for 36 h. After the completion of the reaction indicated by TLC, the reaction mixture was purified through flash column chromatography on silica gel to afford pure product **3aa**.

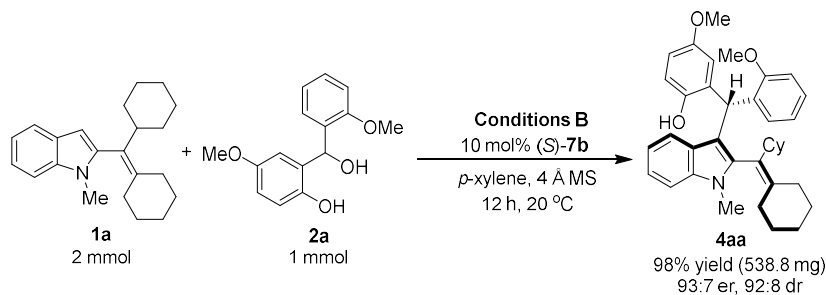

2-Alkenylindoles **1a** (2 mmol), *o*-hydroxybenzyl alcohols **2a** (1 mmol), CPA (*S*)-**7b** (0.1 mmol) and 4 Å MS (1.0 g) were added to a reaction bottle. Then, *p*-xylene (40 mL) was added to the reaction mixture, which was stirred at 20 °C for 12 h. After the completion of the reaction indicated by TLC, the reaction mixture was purified through flash column chromatography on silica gel to afford pure product **4aa**.

## 8. Procedure for the synthesis of 8-10, 13 and characterization data

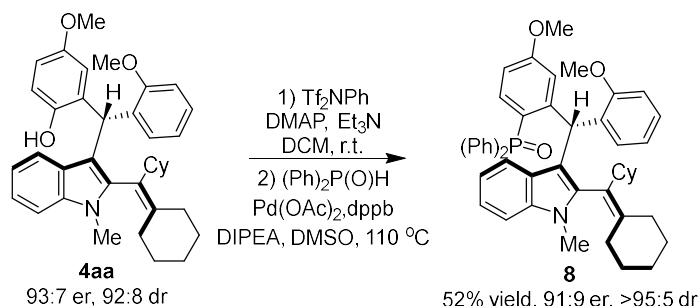

**4aa** (164.8 mg, 0.3 mmol) was dissolved in DCM (3 mL), which was added DMAP (73.6 mg, 0.6 mmol) and Et<sub>3</sub>N (0.13 mL, 0.9 mmol). Then, Tf<sub>2</sub>NPh (160.8 mg, 0.45 mmol) in DCM (1 mL) was added to the reaction mixture, which was further stirred at 25 °C for 1 h. After the completion of the reaction indicated by TLC, the reaction mixture was concentrated under reduced pressure to afford crude product. Under argon atmosphere, DMSO (3 mL) was added to the mixture of previous crude product, Ph<sub>2</sub>P(O)H (42.5 mg, 0.21 mmol), Pd(OAc)<sub>2</sub> (13.5 mg, 0.06 mmol) and dppb (25.5 mg, 0.06 mmol). Then, DIPEA (2.6 mL, 1.5 mmol) was added to the reaction mixture, which was stirred at 110 °C for 24 h. After the completion of the reaction which was indicated by TLC, the reaction mixture was diluted with DCM and quenched with hydrochloric acid (1 M). The resultant mixture was extracted with DCM, and the organic layer was washed successively with saturated NaHCO<sub>3</sub> aqueous solution and brine. Subsequently, the resultant organic layer was dried with anhydrous Na<sub>2</sub>SO<sub>4</sub> and concentrated in vacuo to give a residue, which was purified through flash column chromatography (petroleum ether/ethyl acetate = 4:1) on silica gel to afford pure products **8** as single configuration.

### (*R,S*)-(2-((2-(cyclohexyl(cyclohexylidene)methyl)-1-methyl-1H-indol-3-yl)(2-methoxyphenyl) methyl)-4-methoxyphenyl)diphenylphosphine oxide (**8**):

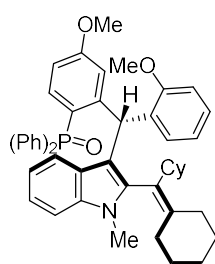

Yield: 52% (114.5 mg); white solid; m.p. 156.2-157.4 °C; >95:5 dr; [ $\alpha$ ]<sub>D</sub><sup>20</sup> = +100.1 (c 0.25, acetone); <sup>1</sup>H NMR (400 MHz, CDCl<sub>3</sub>)  $\delta$  7.64 – 7.57 (m, 2H), 7.50 – 7.45 (m, 1H), 7.43 – 7.37 (m, 2H), 7.26 – 7.22 (m, 2H), 7.20 – 7.13 (m, 2H), 7.06 – 6.94 (m, 5H), 6.88 – 6.81 (m, 2H), 6.67 – 6.52 (m, 4H), 6.48 – 6.40 (m, 2H), 3.54 (s, 3H), 3.51 (s, 3H), 3.42 (s, 3H), 2.96 – 2.87 (m, 1H), 2.54 – 2.46 (m, 1H), 2.34 – 2.28 (m, 1H), 2.23 – 2.16 (m, 1H), 1.81 – 1.67 (m, 4H), 1.51 – 1.37 (m, 5H), 1.33 – 1.28 (m, 2H), 1.23 – 1.10 (m, 3H), 0.98 – 0.76 (m, 3H), 0.71 – 0.62 (m, 2H); <sup>13</sup>C NMR (100 MHz, CDCl<sub>3</sub>)  $\delta$  157.9, 143.4, 136.4, 132.1, 132.0, 131.8, 131.5, 131.4, 130.8, 129.0, 128.3, 128.2, 127.3, 127.2, 127.1, 119.8, 119.4, 118.9, 118.4, 113.4, 110.3, 108.6, 55.0, 54.8, 41.3, 33.2, 33.0, 31.4, 30.8, 29.7, 28.0, 27.3, 27.3, 26.7, 26.4; <sup>31</sup>P NMR (162 MHz, CDCl<sub>3</sub>)  $\delta$  29.36; IR (KBr): 3390, 2929, 2813, 2715, 1632, 1597, 1382, 1350, 1116, 776; ESI FTMS exact mass calcd for (C<sub>49</sub>H<sub>52</sub>NO<sub>3</sub>P+Na)<sup>+</sup> requires m/z 756.3577, found m/z 756.3581; The enantiomeric ratio: 91:9, determined by HPLC (Daicel Chiralpak IG, hexane/isopropanol = 98/2, flow rate 1.0 mL/min, T = 30 °C, 254 nm): t<sub>R</sub> = 17.076 (minor), t<sub>R</sub> = 21.163 (major).

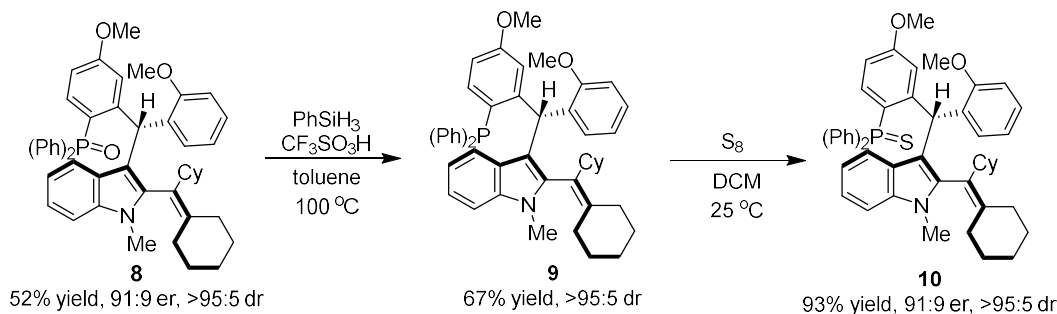

Under argon atmosphere, compound **8** (73.4 mg, 0.1 mmol) was dissolved in anhydrous toluene (1 mL), which was added PhSiH<sub>3</sub> (49 μL, 0.4 mmol) and CF<sub>3</sub>SO<sub>3</sub>H (1.6 μL, 0.02 mmol). Then, the reaction mixture was heated to 100 °C for 12 h. After the completion of the reaction which was indicated by TLC, the reaction mixture was quenched with saturated NaHCO<sub>3</sub> aqueous solution. The organic layer was dried over anhydrous Na<sub>2</sub>SO<sub>4</sub> and concentrated in vacuo to give a residue, which was further purified by preparative thin layer chromatography on silica gel (petroleum ether/ethyl acetate = 10:1) to afford compound **9**.

**(*R,S*)-2-(cyclohexyl(cyclohexylidene)methyl)-3-((2-(diphenylphosphaneyl)-5-methoxyphenyl)(2-methoxyphenyl)methyl)-1-methyl-1H-indole (9):**

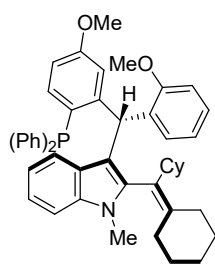

Yield: 67% (48.2 mg); colorless oil; >95:5 dr;  $[\alpha]_D^{20} = +118.7$  (c 0.20, acetone); <sup>1</sup>H NMR (400 MHz, CDCl<sub>3</sub>) δ 7.33 – 7.27 (m, 3H), 7.25 – 7.15 (m, 3H), 7.11 – 6.98 (m, 6H), 6.91 – 6.84 (m, 2H), 6.76 (d, *J* = 7.4 Hz, 1H), 6.73 – 6.58 (m, 7H), 3.56 (s, 3H), 3.52 (s, 3H), 3.51 (s, 3H), 2.63 – 2.55 (m, 1H), 2.36 – 2.26 (m, 1H), 2.06 – 1.99 (m, 1H), 1.85 – 1.75 (m, 2H), 1.72 – 1.60 (m, 4H), 1.50 – 1.41 (m, 3H), 1.34 – 1.29 (m, 3H), 1.24 – 1.15 (m, 2H), 1.03 – 0.84 (m, 3H), 0.74 – 0.64 (m, 1H); <sup>13</sup>C NMR (100 MHz, CDCl<sub>3</sub>) δ 160.1, 157.8, 152.5, 143.8, 139.5, 139.2, 138.2, 136.7, 136.4, 133.6, 133.4, 133.4, 133.2, 132.5, 131.7, 128.8, 128.1, 127.7, 127.6, 127.2, 126.7, 126.5, 120.0, 119.6, 119.4, 118.5, 117.3, 113.1, 111.3, 110.5, 108.6, 55.2, 54.9, 42.2, 42.0, 41.8, 33.2, 33.0, 31.0, 30.5, 29.7, 27.9, 27.4, 27.3, 27.1, 26.6, 26.1; <sup>31</sup>P NMR (162 MHz, CDCl<sub>3</sub>) δ -20.13; IR (KBr): 3421, 2926, 2849, 1632, 1598, 1382, 1352, 1116, 910, 746, 618. ESI FTMS exact mass calcd for (C<sub>49</sub>H<sub>52</sub>NO<sub>2</sub>P+H)<sup>+</sup> requires *m/z* 718.3809, found *m/z* 718.3812.

To the solution of **9** (71.8 mg, 0.1 mmol) in DCM (1 mL) was added sulfur (4.8 mg, 0.15 mmol). Then, the reaction mixture was stirred at 25 °C for 10 min. After the completion of the reaction which was indicated by TLC, the reaction mixture was purified through preparative thin layer chromatography on silica gel (petroleum ether/ethyl acetate = 5:1) to afford pure product **10**.

**(*R,S*)-2-((2-(cyclohexyl(cyclohexylidene)methyl)-1-methyl-1H-indol-3-yl)(2-methoxyphenyl) methyl)-4-methoxyphenyl)diphenylphosphine sulfide (10):**

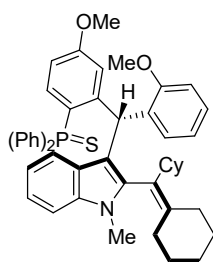

Yield: 93% (69.7 mg); colorless oil; >95:5 dr;  $[\alpha]_D^{20} = +104.7$  (c 0.22, acetone);  $^1\text{H NMR}$  (400 MHz,  $\text{CDCl}_3$ )  $\delta$  7.78 – 7.68 (m, 2H), 7.52 – 7.44 (m, 2H), 7.44 – 7.33 (m, 3H), 7.16 (d,  $J = 8.1$  Hz, 1H), 7.13 – 7.07 (m, 1H), 7.06 – 6.89 (m, 6H), 6.87 – 6.81 (m, 1H), 6.70 (d,  $J = 7.6$  Hz, 1H), 6.64 – 6.53 (m, 3H), 6.33 – 6.23 (m, 2H), 3.54 (s, 3H), 3.50 (s, 3H), 3.29 (s, 3H), 3.08 – 2.99 (m, 1H), 2.59 – 2.49 (m, 2H), 2.25 – 2.17 (m, 1H), 1.89 – 1.72 (m, 4H), 1.70 – 1.65 (m, 1H), 1.52 – 1.39 (m, 4H), 1.36 – 1.30 (m, 1H), 1.26 – 1.17 (m, 3H), 1.13 – 1.05 (m, 1H), 0.89 – 0.79 (m, 2H), 0.65 – 0.56 (m, 1H).  $^{13}\text{C NMR}$  (100 MHz,  $\text{CDCl}_3$ )  $\delta$  157.8, 143.3, 139.7, 136.4, 135.9, 135.7, 132.3, 132.2, 131.2, 131.0, 130.6, 130.4, 129.1, 128.3, 128.1, 127.3, 127.1, 127.0, 126.9, 119.8, 119.4, 118.8, 118.4, 113.8, 110.2, 110.1, 109.9, 108.6, 55.0, 54.5, 41.6, 40.5, 34.5, 33.2, 31.1, 31.0, 30.9, 28.0, 27.6, 27.4, 26.7, 26.6;  $^{31}\text{P NMR}$  (162 MHz,  $\text{CDCl}_3$ )  $\delta$  41.12; IR (KBr): 3432, 2920, 1667, 1589, 1388, 1265, 1116, 912, 747; ESI FTMS exact mass calcd for  $(\text{C}_{49}\text{H}_{52}\text{NO}_2\text{PS}+\text{Na})^+$  requires  $m/z$  772.3348, found  $m/z$  772.3325; The enantiomeric ratio: 91:9, determined by HPLC (Daicel Chiralpak AD-3, hexane/ isopropanol = 98/ 2, flow rate 0.3 mL/min,  $T = 30$  °C, 254 nm):  $t_R = 21.923$  (minor),  $t_R = 27.363$  (major).

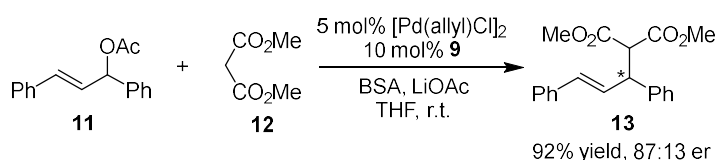

Under argon atmosphere, to the mixture of chiral phosphine ligand **9** (7.8 mg, 0.01 mmol),  $[\text{Pd}(\text{allyl})\text{Cl}]_2$  (18.3 mg, 0.005 mmol) and LiOAc (2.6 mg, 0.04 mmol) in THF (1 mL) were added allylic ester **11** (25.2 mg, 0.1 mmol), which was stirred at room temperature for 30 min. Then, dimethyl malonate **12** (39.6 mg, 0.3 mmol) and *N,O*-bis(trimethylsilyl)acetamide (BSA, 61.0 mg, 0.3 mmol) was added and the reaction mixture was stirred at 25 °C for 12 h. After the completion of the reaction which was indicated by TLC, the reaction mixture was quenched with water, diluted and extracted with ethyl acetate. The organic layer was washed with brine, dried over  $\text{Na}_2\text{SO}_4$ , and concentrated in vacuo to give a residue, which was further purified by preparative thin layer chromatography on silica gel (petroleum ether/ethyl acetate = 4:1) to afford product **13**.

#### dimethyl (*E*)-2-(1,3-diphenylallyl)malonate (**13**):

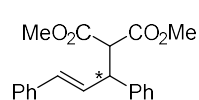

Yield: 92% (29.8 mg); colorless oil;  $[\alpha]_D^{20} = -13.6$  (c 0.26, acetone);  $^1\text{H NMR}$  (400 MHz,  $\text{CDCl}_3$ )  $\delta$  7.37 – 7.27 (m, 7H), 7.27 – 7.18 (m, 3H), 6.49 (d,  $J = 15.7$  Hz, 1H), 6.39 – 6.27 (m, 1H), 4.34 – 4.22 (m, 1H), 3.96 (d,  $J = 12.3$  Hz, 1H), 3.71 (s, 3H), 3.52 (s, 3H);  $^{13}\text{C NMR}$  (100 MHz,  $\text{CDCl}_3$ )  $\delta$  168.2, 167.8, 140.2, 136.9, 131.9, 129.2, 128.8, 128.5, 127.9, 127.6, 127.2, 126.4, 57.7, 52.7, 52.5, 49.2; IR (KBr): 3396, 2921, 2754, 1736, 1596, 1389, 1265, 1115, 745; ESI FTMS exact mass calcd for  $(\text{C}_{20}\text{H}_{20}\text{O}_4+\text{Na})^+$  requires  $m/z$  347.1254, found  $m/z$  347.1242; The enantiomeric ratio: 87:13, determined by HPLC (Daicel Chiralpak ID, hexane/ isopropanol = 70/ 30, flow rate 1.0 mL/min,  $T = 30$  °C, 254 nm):  $t_R = 8.676$ (major),  $t_R = 18.413$  (minor).



## 9. Determination of the absolute configurations of products 3 and 4

### Determination of the absolute configuration of products 3:

The absolute configuration of **3aa** was determined to be (*R<sub>a</sub>,S*) by single-crystal X-ray diffraction analysis. Products **3** were synthesized in the presence of the same chiral phosphoric acid (*S*)-**7a**, so the absolute configurations of products **3** were deduced to be (*R<sub>a</sub>,S*) by analogy with **3aa**.

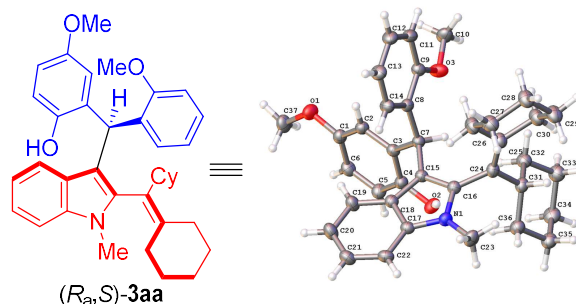

### Determination of the absolute configuration of products 4:

The absolute configuration of **4ak** was determined as (*R<sub>a</sub>,R*) by comparison its HPLC trace with that of a known chiral compound.

The details are as follows:

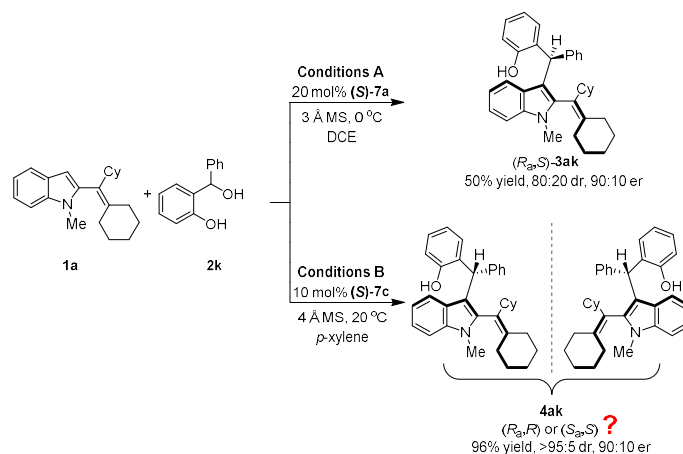

According to the general procedure **A**, we utilized the reaction of C3-unsubstituted 2-alkenylindole **1a** and *o*-hydroxybenzyl alcohol **2k** under the catalysis of (*S*)-**7a** to synthesize (*R<sub>a</sub>,S*)-**3ak** in 50% yield with 80:20 dr and 90:10 er. According to the general procedure **B**, we utilized the reaction of C3-unsubstituted 2-alkenylindole **1a** and *o*-hydroxybenzyl alcohol **2k** under the catalysis of (*S*)-**7c** to synthesize **4ak** in 96% yield with >95:5 dr and 90:10 er. Product **4ak** was the diastereoisomer of product (*R<sub>a</sub>,S*)-**3ak**, so the absolute configuration of **4ak** was deduced to be (*R<sub>a</sub>,R*) or (*S<sub>a</sub>,S*).

Compound (*R<sub>a</sub>,S*)-**3ak** bearing axial and central chirality could be easily transformed into compound (*R<sub>a</sub>*)-**S12** only bearing axial chirality in 90% yield with 87:13 er. In addition, compound **4ak** could be transformed

into compound **S12** in 87% yield with 89:11 er.

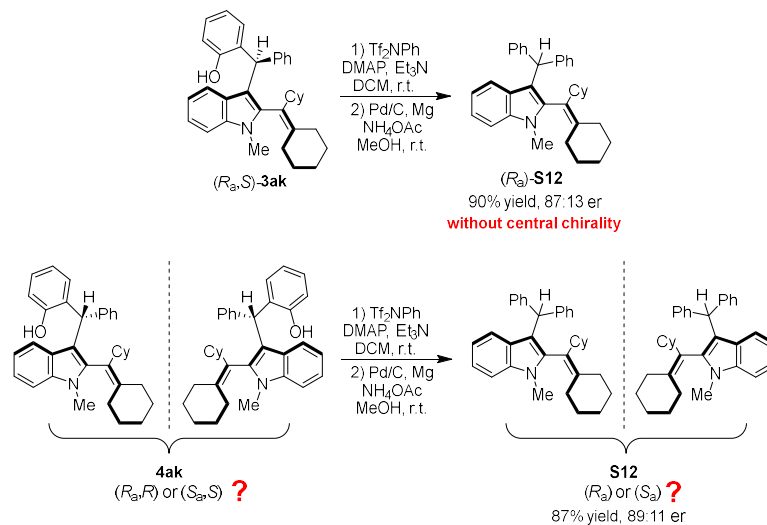

Then, we compared the HPLC trace of compound (*R<sub>a</sub>*)-**S12** with that of compound **S12**. Obviously, in the two cases, the retention time for the peak of the major enantiomer and that of the minor enantiomer are similar. As shown below, in the HPLC trace of compound (*R<sub>a</sub>*)-**S12**, the retention time for the peak of the major enantiomer is around 17.2 min, and that of the minor enantiomer is around 18.1 min (**Figure S1**). Similarly, in the HPLC trace of compound **S13**, the retention time for the peak of the major enantiomer is around 16.8 min, and that of the minor enantiomer is around 17.6 min (**Figure S2**).

This result demonstrates that compound (*R<sub>a</sub>*)-**S12** and compound **S12** have the same absolute configuration. Therefore, the absolute configuration of compound **S12** was determined to be (*R<sub>a</sub>*), and the absolute configuration of **4ak** was deduced to be (*R<sub>a,R</sub>*) by analogy with **S12**. Products **4** were synthesized in the presence of the same type of chiral phosphoric acid (*S*)-**7b** or (*S*)-**7c**, so the absolute configurations of products **4** were deduced to be (*R<sub>a,R</sub>*) by analogy with **4ak**.

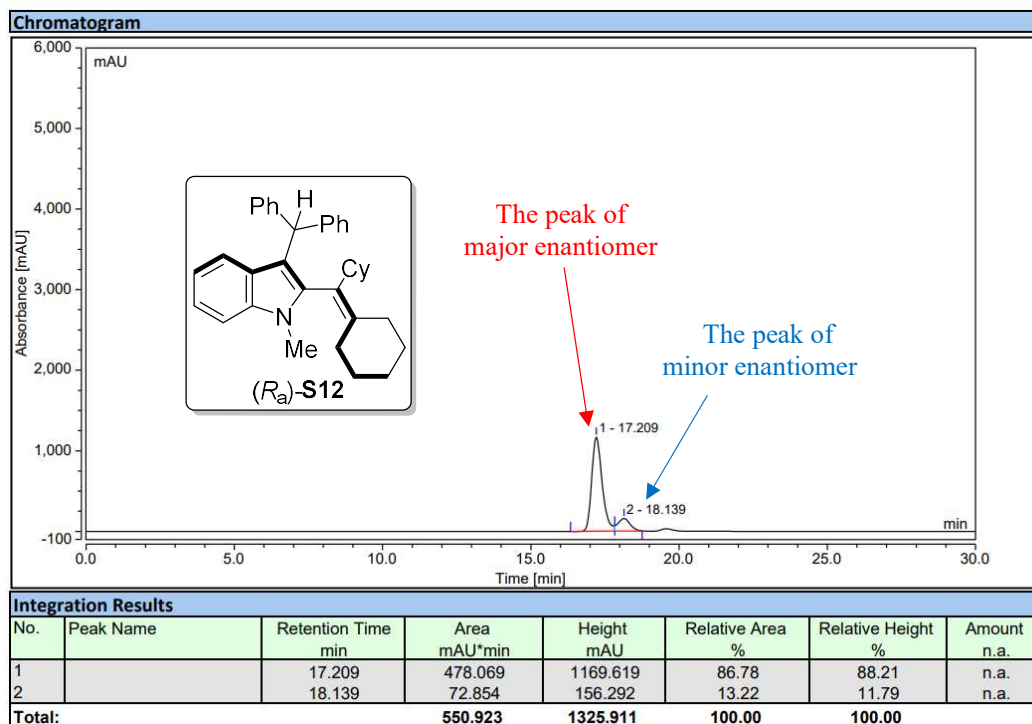

Figure S1. HPLC trace of (*R<sub>a</sub>*)-S12

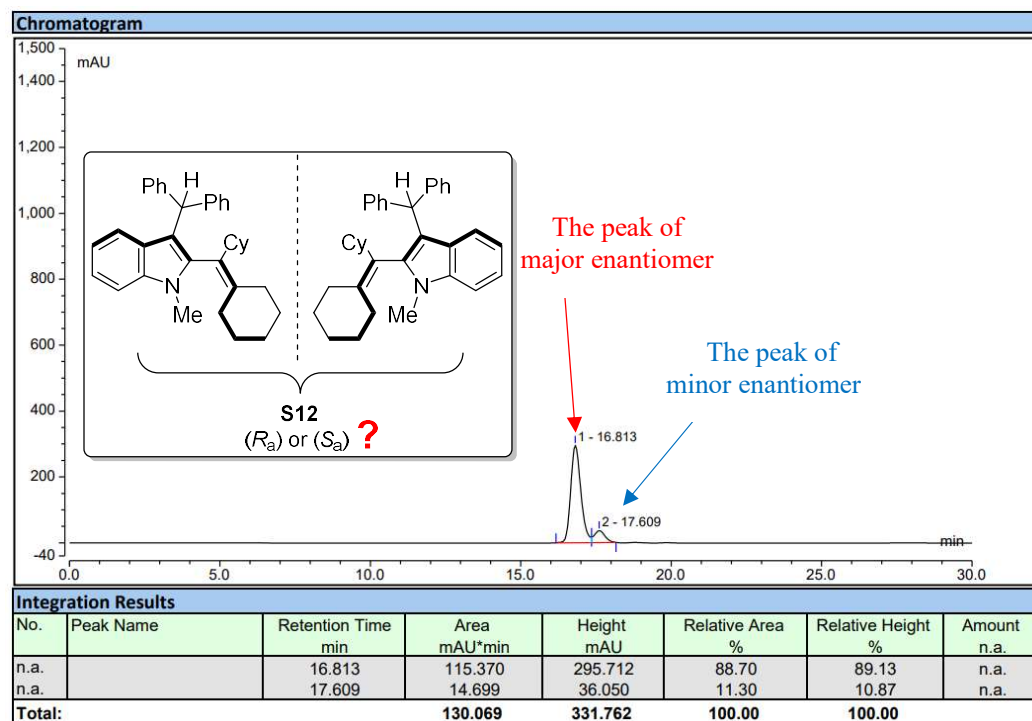

Figure S2. HPLC trace of 12

## 10. Synthetic procedure and characterization data of products S12

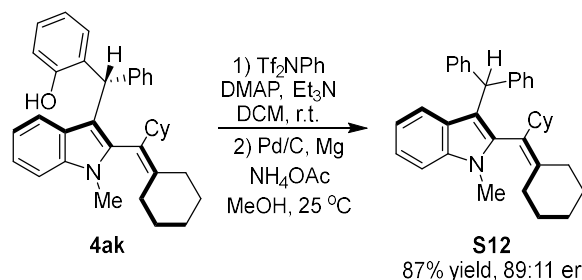

**4ak** (49.0 mg, 0.1 mmol) was dissolved in DCM (1 mL), which was added DMAP (24.5mg, 0.2 mmol) and Et<sub>3</sub>N (43  $\mu$ L, 0.3 mmol). Then, Tf<sub>2</sub>NPh (53.6 mg, 0.15 mmol) in DCM (1 mL) was added to the reaction mixture, which was further stirred at 25 °C for 1 h. After the completion of the reaction indicated by TLC, the reaction mixture was concentrated under reduced pressure to afford crude product. Under argon atmosphere, methanol (2 mL) was added to the mixture of crude product, Mg (24 mg, 1 mmol), Pd/C (63.6 mg, 0.6 mmol), and ammonium acetate (154 mg, 2 mmol). After the mixture had been stirred at room temperature overnight and the completion of the reaction indicated by TLC, the reaction mixture was filtered, and the filtrate was concentrated under the reduced pressure to give the residue, which was then added to water (5 mL), extracted by ethyl acetate, and dried by anhydrous Na<sub>2</sub>SO<sub>4</sub>. The resultant organic layer was again concentrated under reduced pressure to give pure products **S12**.

### (*R<sub>a</sub>*)-3-benzhydryl-2-(cyclohexyl(cyclohexylidene)methyl)-1-methyl-1H-indole (**S12**):

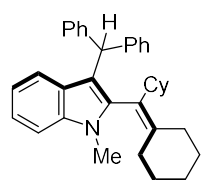

Yield: 87% (41.2 mg); colorless oil;  $[\alpha]_D^{20} = -7.1$  (c 0.56, acetone); <sup>1</sup>H NMR (400 MHz, CDCl<sub>3</sub>)  $\delta$  7.31 – 7.27 (m, 1H), 7.26 – 7.22 (m, 4H), 7.22 – 7.08 (m, 7H), 6.97 – 6.91 (m, 1H), 6.90 – 6.83 (m, 1H), 5.59 (s, 1H), 3.58 (s, 3H), 2.71 – 2.59 (m, 1H), 2.52 – 2.42 (m, 1H), 2.38 – 2.28 (m, 1H), 1.72 – 1.56 (m, 5H), 1.54 – 1.41 (m, 6H), 1.25 – 1.08 (m, 5H), 0.94 – 0.85 (m, 1H), 0.74 – 0.59 (m, 1H); <sup>13</sup>C NMR (100 MHz, CDCl<sub>3</sub>)  $\delta$  145.0, 144.3, 139.5, 136.9, 129.5, 129.4, 128.0, 127.5, 126.8, 125.8, 125.7, 121.0, 120.3, 118.8, 114.0, 109.1, 48.5, 40.9, 33.2, 33.1, 31.3, 30.7, 30.4, 28.4, 27.6, 26.8, 26.7, 25.9; IR (KBr): 3447, 2925, 2851, 2085, 1636, 1466, 1263, 741; ESI FTMS exact mass calcd for (C<sub>35</sub>H<sub>39</sub>N+H)<sup>+</sup> requires m/z 474.3156, found m/z 474.3162; The enantiomeric ratio: 89:11, determined by HPLC (Daicel Chiralpak AD-3, hexane/ isopropanol = 99.8/0.2, flow rate 0.2 mL/min, T = 30 °C, 254 nm): t<sub>R</sub> = 16.813 (major), t<sub>R</sub> = 17.609 (minor).

## 11. X-ray single crystal data for compounds 3aa and rac-4ak

### X-ray single crystal data for compound 3aa:

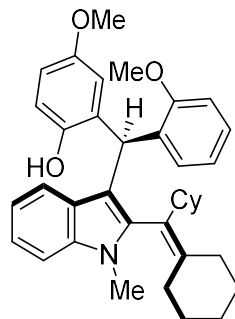

(*R<sub>a</sub>,S*)-3aa

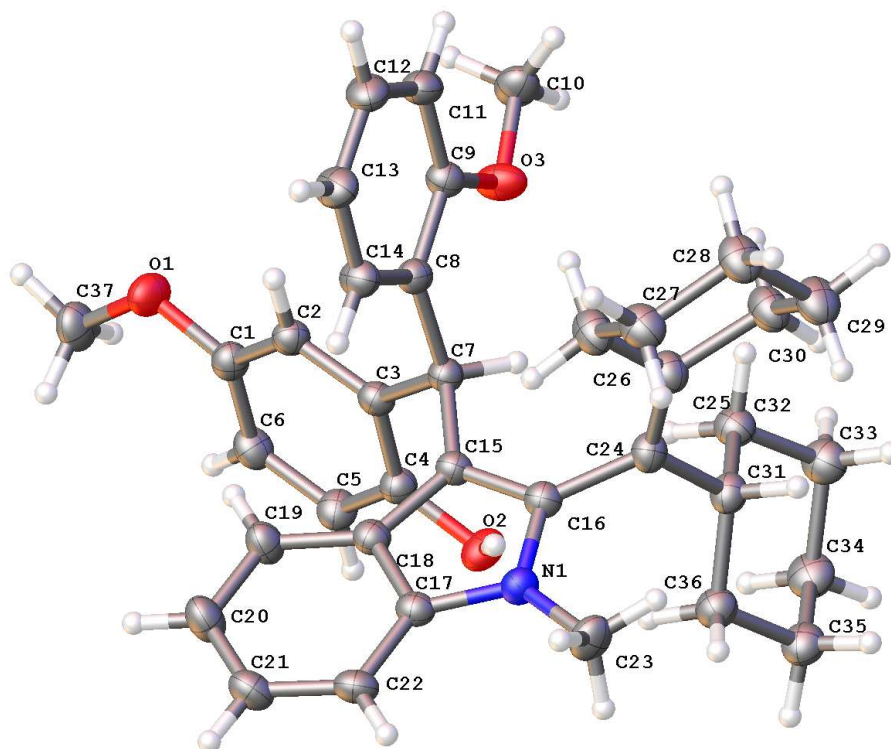

The X-ray source used for the single crystal X-ray diffraction analysis of compound **3aa** was GaK $\alpha$  ( $\lambda = 1.34139$ ), and the thermal ellipsoid was drawn at the 30% probability level.

|                   |                                                 |
|-------------------|-------------------------------------------------|
| Empirical formula | C <sub>37</sub> H <sub>43</sub> NO <sub>3</sub> |
| Formula weight    | 549.72                                          |
| Temperature/K     | 213.00                                          |
| Crystal system    | orthorhombic                                    |

|                                             |                                                               |
|---------------------------------------------|---------------------------------------------------------------|
| Space group                                 | P2 <sub>1</sub> 2 <sub>1</sub> 2 <sub>1</sub>                 |
| a/Å                                         | 8.6573(3)                                                     |
| b/Å                                         | 15.4579(5)                                                    |
| c/Å                                         | 22.6451(8)                                                    |
| α/°                                         | 90                                                            |
| β/°                                         | 90                                                            |
| γ/°                                         | 90                                                            |
| Volume/Å <sup>3</sup>                       | 3030.45(18)                                                   |
| Z                                           | 4                                                             |
| ρ <sub>calc</sub> /cm <sup>3</sup>          | 1.205                                                         |
| μ/mm <sup>-1</sup>                          | 0.373                                                         |
| F(000)                                      | 1184.0                                                        |
| Crystal size/mm <sup>3</sup>                | 0.07 × 0.07 × 0.05                                            |
| Radiation                                   | GaKα (λ = 1.34139)                                            |
| 2θ range for data collection/°              | 6.022 to 109.784                                              |
| Index ranges                                | -10 ≤ h ≤ 10, -18 ≤ k ≤ 18, -25 ≤ l ≤ 27                      |
| Reflections collected                       | 32877                                                         |
| Independent reflections                     | 5766 [R <sub>int</sub> = 0.0593, R <sub>sigma</sub> = 0.0394] |
| Data/restraints/parameters                  | 5766/1/377                                                    |
| Goodness-of-fit on F <sup>2</sup>           | 1.098                                                         |
| Final R indexes [I >= 2σ (I)]               | R <sub>1</sub> = 0.0526, wR <sub>2</sub> = 0.1377             |
| Final R indexes [all data]                  | R <sub>1</sub> = 0.0627, wR <sub>2</sub> = 0.1479             |
| Largest diff. peak/hole / e Å <sup>-3</sup> | 0.30/-0.23                                                    |
| Flack parameter                             | 0.08(13)                                                      |

**X-ray single crystal data for compound *rac-4ak*:**

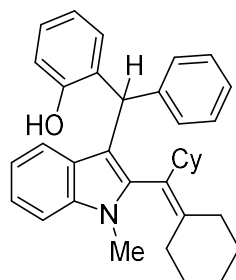

***rac-4ak***

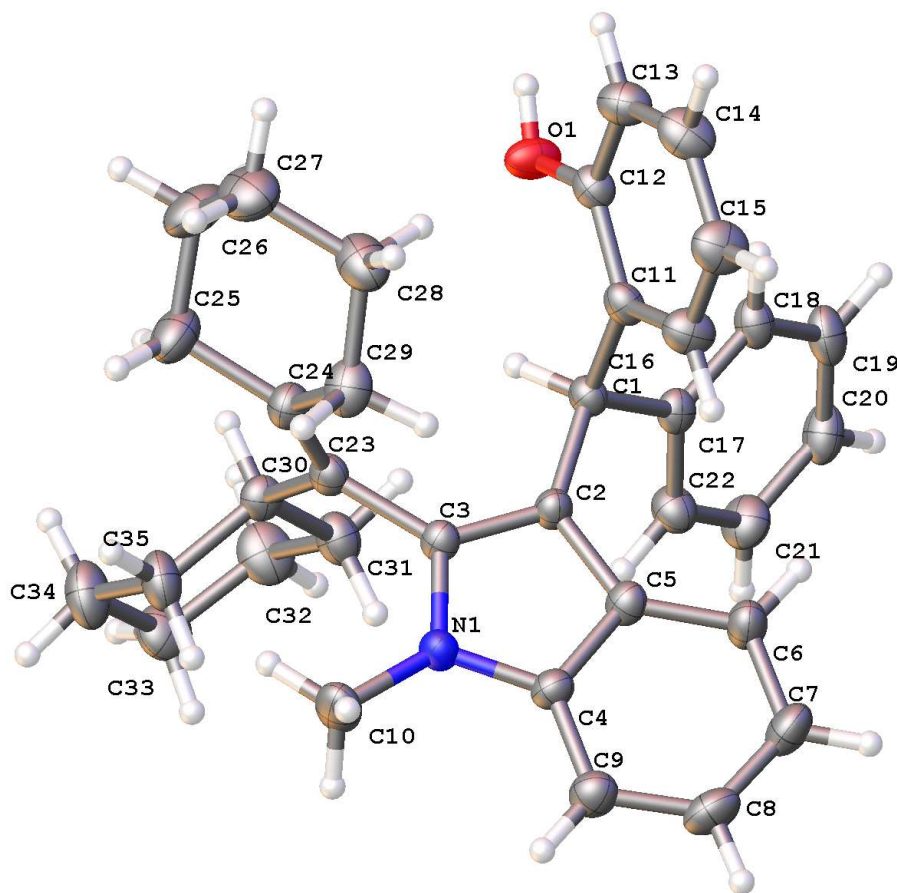

The X-ray source used for the single crystal X-ray diffraction analysis of compound *rac-4ak* was GaK $\alpha$  ( $\lambda = 1.34139$ ), and the thermal ellipsoid was drawn at the 30% probability level.

|                   |                                    |
|-------------------|------------------------------------|
| Empirical formula | C <sub>35</sub> H <sub>39</sub> NO |
| Formula weight    | 489.30                             |
| Temperature/K     | 213.00                             |
| Crystal system    | monoclinic                         |

|                                             |                                                                |
|---------------------------------------------|----------------------------------------------------------------|
| Space group                                 | P2 <sub>1</sub> /c                                             |
| a/Å                                         | 23.0178(8)                                                     |
| b/Å                                         | 14.5823(5)                                                     |
| c/Å                                         | 23.1103(8)                                                     |
| α/°                                         | 90                                                             |
| β/°                                         | 117.911(2)                                                     |
| γ/°                                         | 90                                                             |
| Volume/Å <sup>3</sup>                       | 6854.7(4)                                                      |
| Z                                           | 8                                                              |
| ρ <sub>calc</sub> /cm <sup>3</sup>          | 1.007                                                          |
| μ/mm <sup>-1</sup>                          | 0.293                                                          |
| F(000)                                      | 2248.0                                                         |
| Crystal size/mm <sup>3</sup>                | 0.07 × 0.07 × 0.05                                             |
| Radiation                                   | GaKα (λ = 1.34139)                                             |
| 2θ range for data collection/°              | 5.272 to 109.93                                                |
| Index ranges                                | -28 ≤ h ≤ 28, -13 ≤ k ≤ 17, -28 ≤ l ≤ 28                       |
| Reflections collected                       | 56358                                                          |
| Independent reflections                     | 13259 [R <sub>int</sub> = 0.0815, R <sub>sigma</sub> = 0.0743] |
| Data/restraints/parameters                  | 13259/157/757                                                  |
| Goodness-of-fit on F <sup>2</sup>           | 1.134                                                          |
| Final R indexes [I ≥ 2σ (I)]                | R <sub>1</sub> = 0.0993, wR <sub>2</sub> = 0.2842              |
| Final R indexes [all data]                  | R <sub>1</sub> = 0.1465, wR <sub>2</sub> = 0.3249              |
| Largest diff. peak/hole / e Å <sup>-3</sup> | 0.79/-0.45                                                     |



## 12. NMR spectra of substrates 1

$^1\text{H}$  NMR (400 MHz,  $\text{CDCl}_3$ ) of compound **1a**:

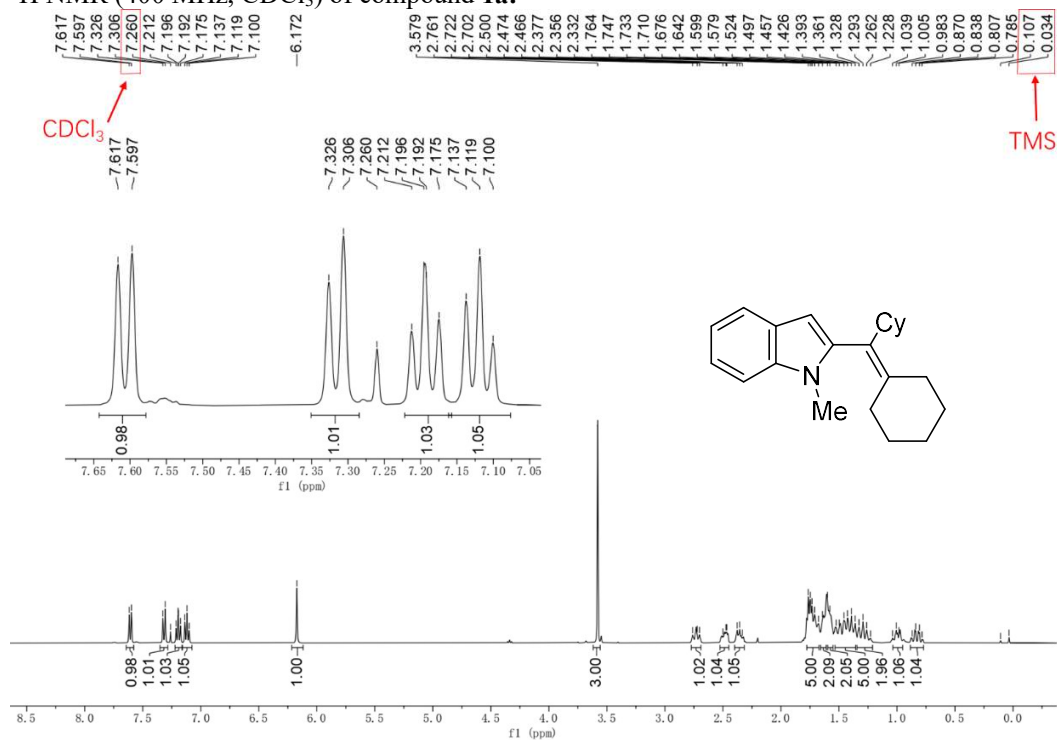

$^{13}\text{C}$  NMR (100 MHz,  $\text{CDCl}_3$ ) of compound **1a**:

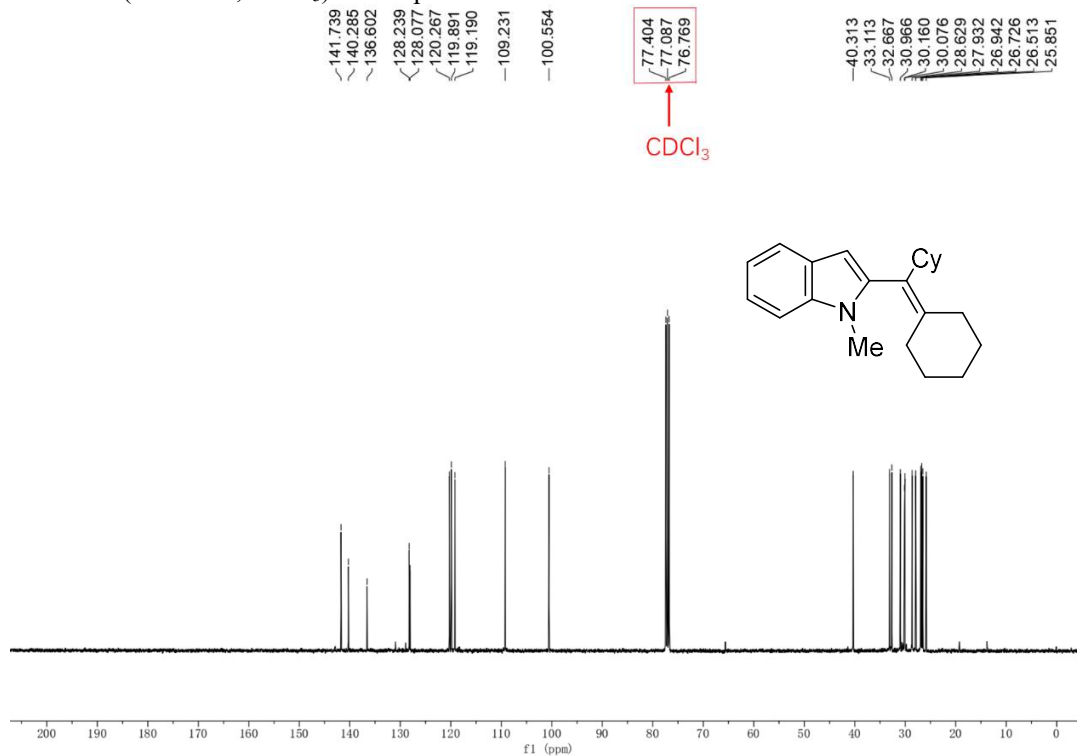

$^1\text{H}$  NMR (400 MHz,  $\text{CDCl}_3$ ) of compound **1b**:

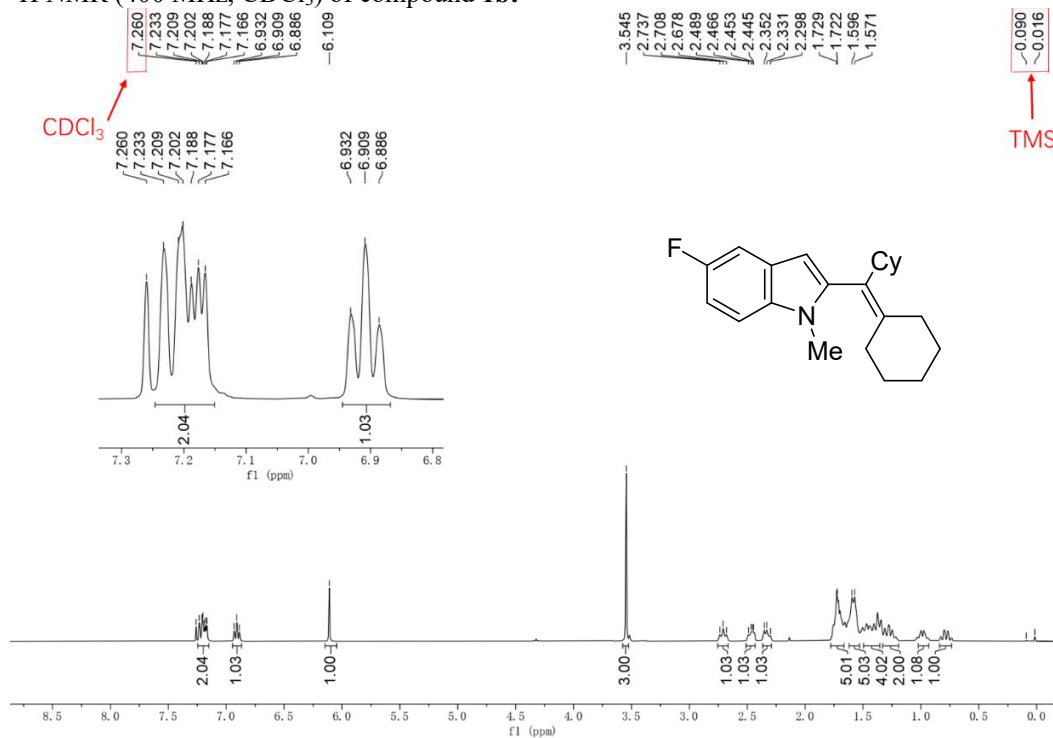

$^{13}\text{C}$  NMR (100 MHz,  $\text{CDCl}_3$ ) of compound **1b**:

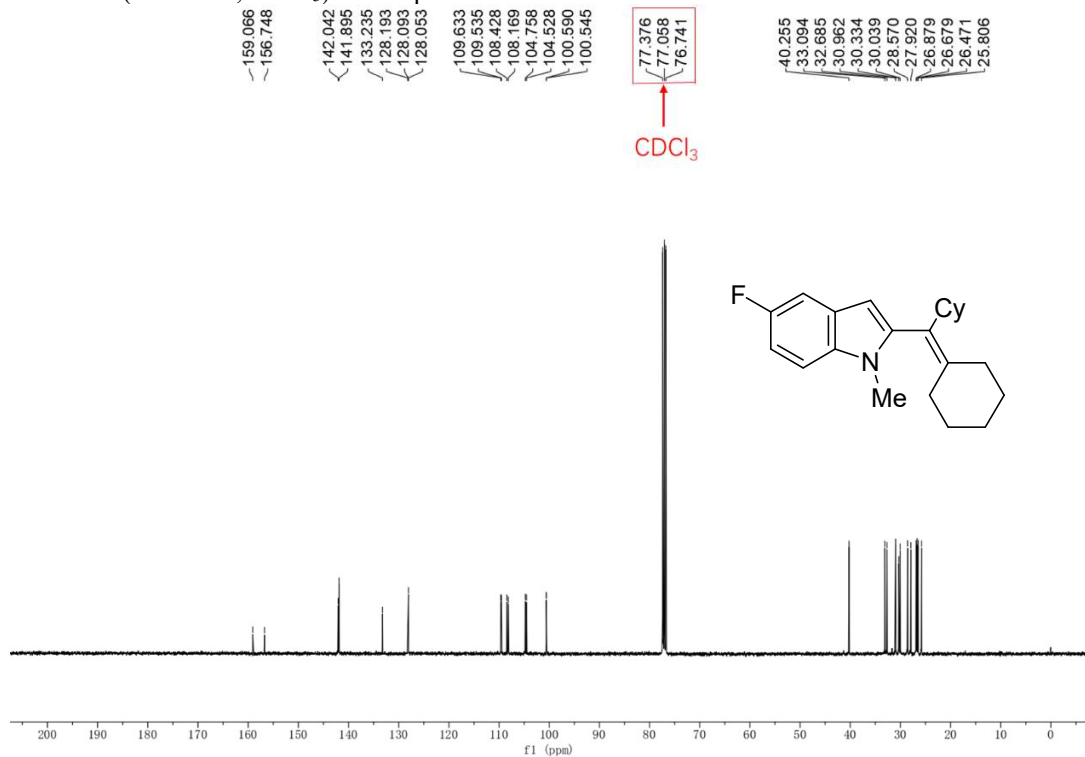

$^{19}\text{F}$  NMR (376 MHz,  $\text{CDCl}_3$ ) of compound **1b**:

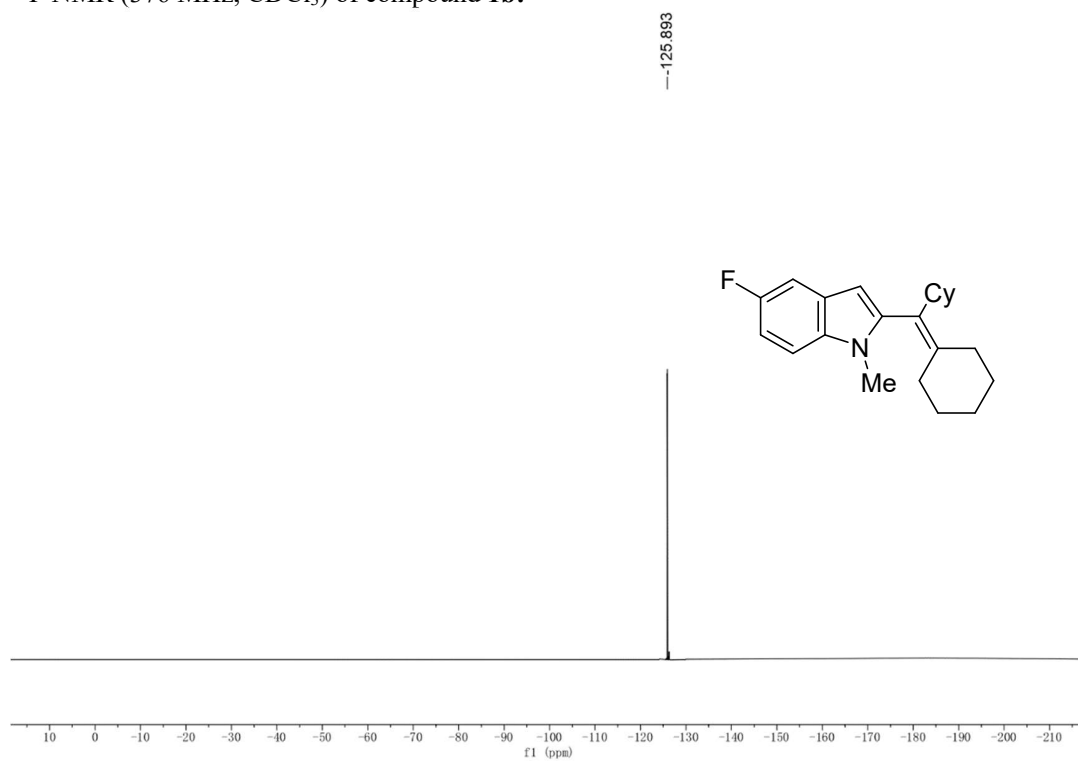

$^1\text{H}$  NMR (400 MHz,  $\text{CDCl}_3$ ) of compound **1c**:

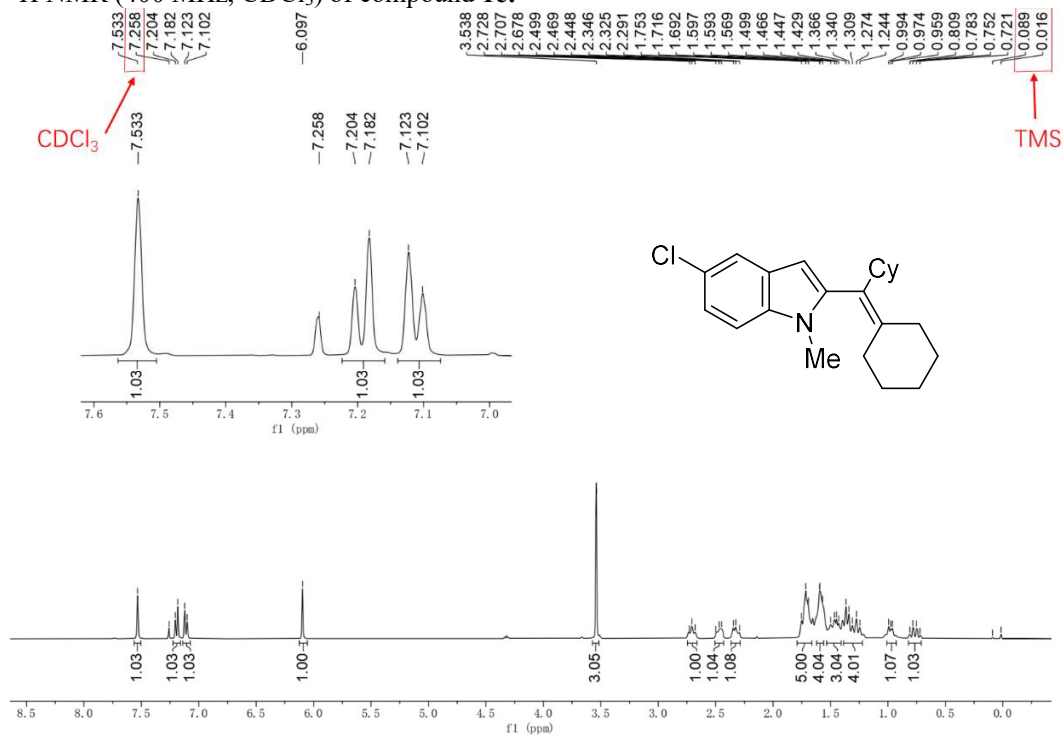

$^{13}\text{C}$  NMR (100 MHz,  $\text{CDCl}_3$ ) of compound **1c**:

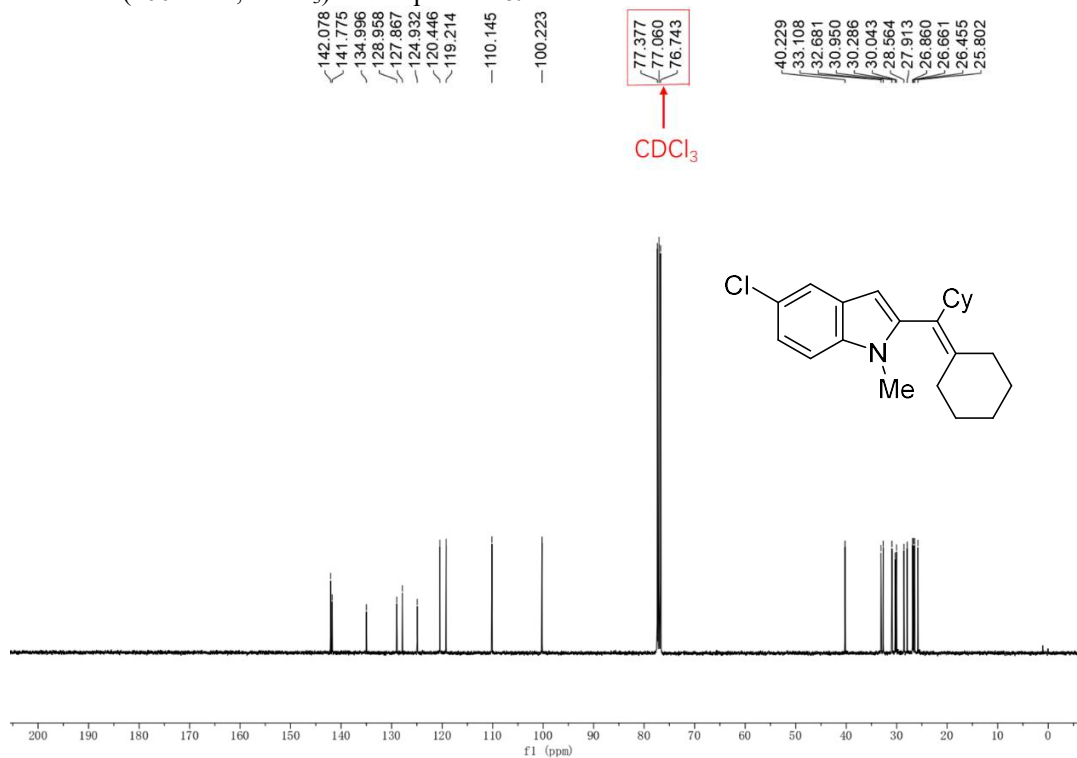

$^1\text{H}$  NMR (400 MHz,  $\text{CDCl}_3$ ) of compound **1d**:

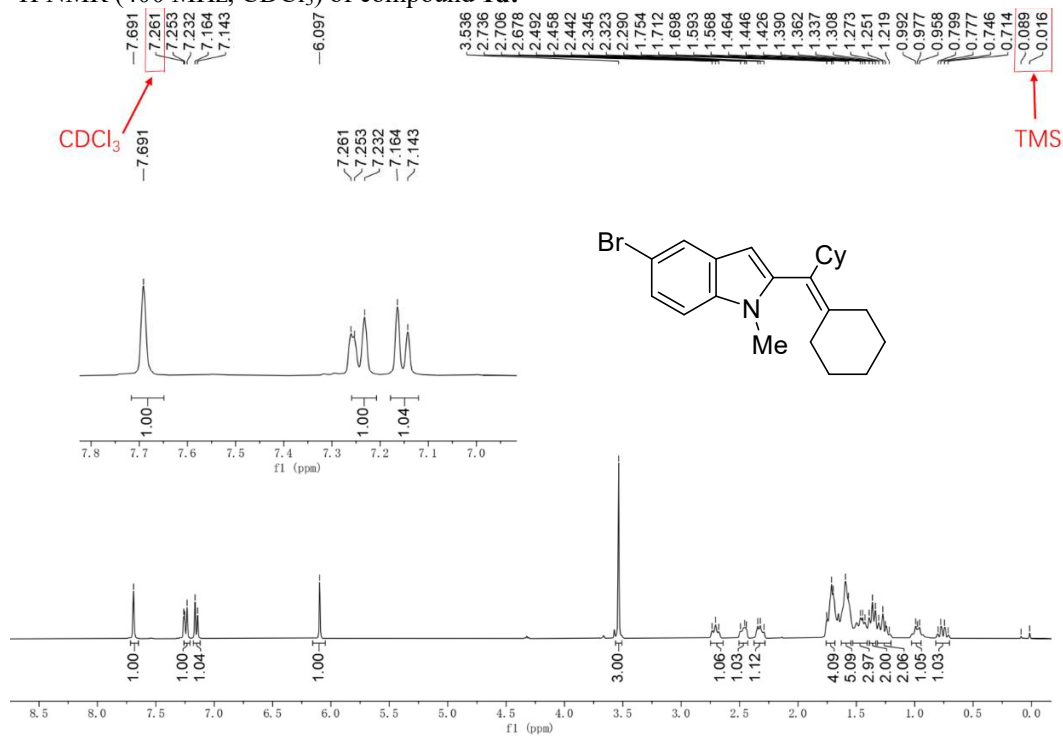

$^{13}\text{C}$  NMR (100 MHz,  $\text{CDCl}_3$ ) of compound **1d**:

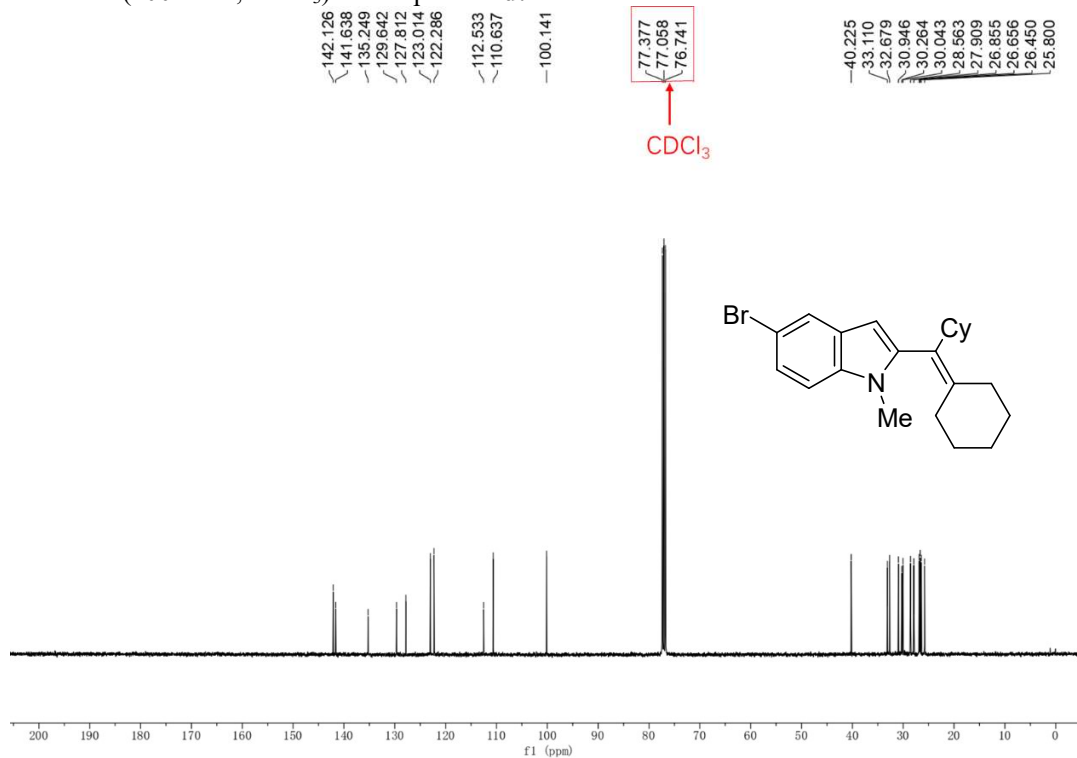

$^1\text{H}$  NMR (400 MHz,  $\text{CDCl}_3$ ) of compound **1e**:

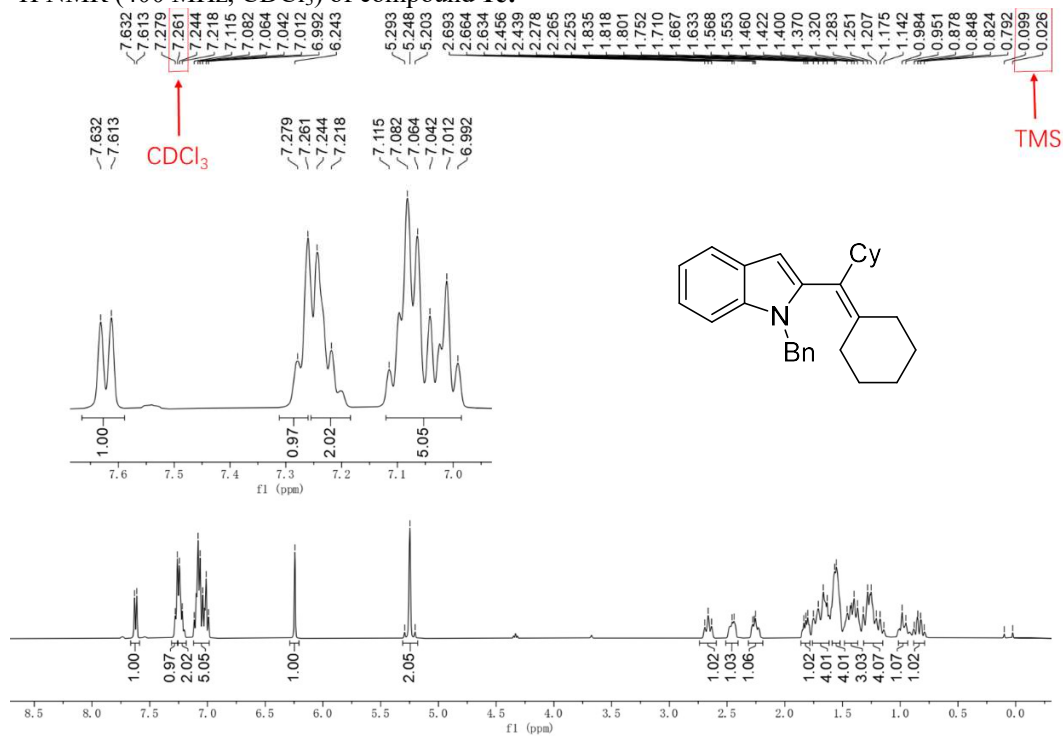

$^{13}\text{C}$  NMR (100 MHz,  $\text{CDCl}_3$ ) of compound **1e**:

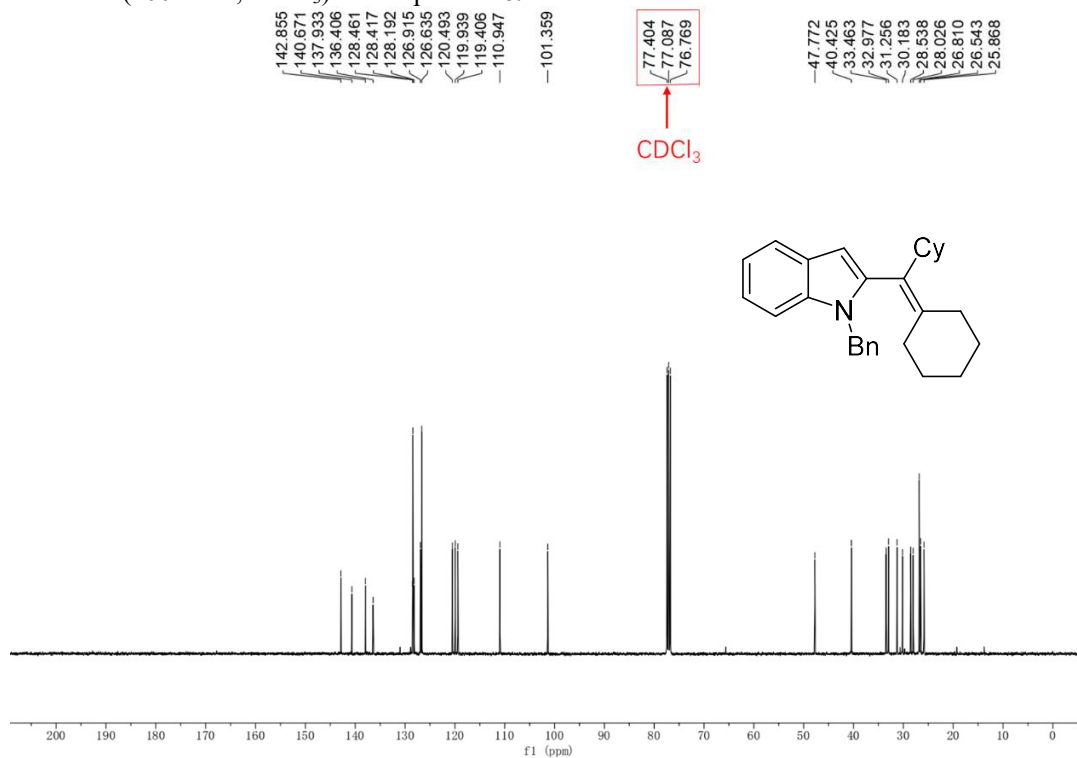

$^1\text{H}$  NMR (400 MHz,  $\text{CDCl}_3$ ) of compound **1f**:

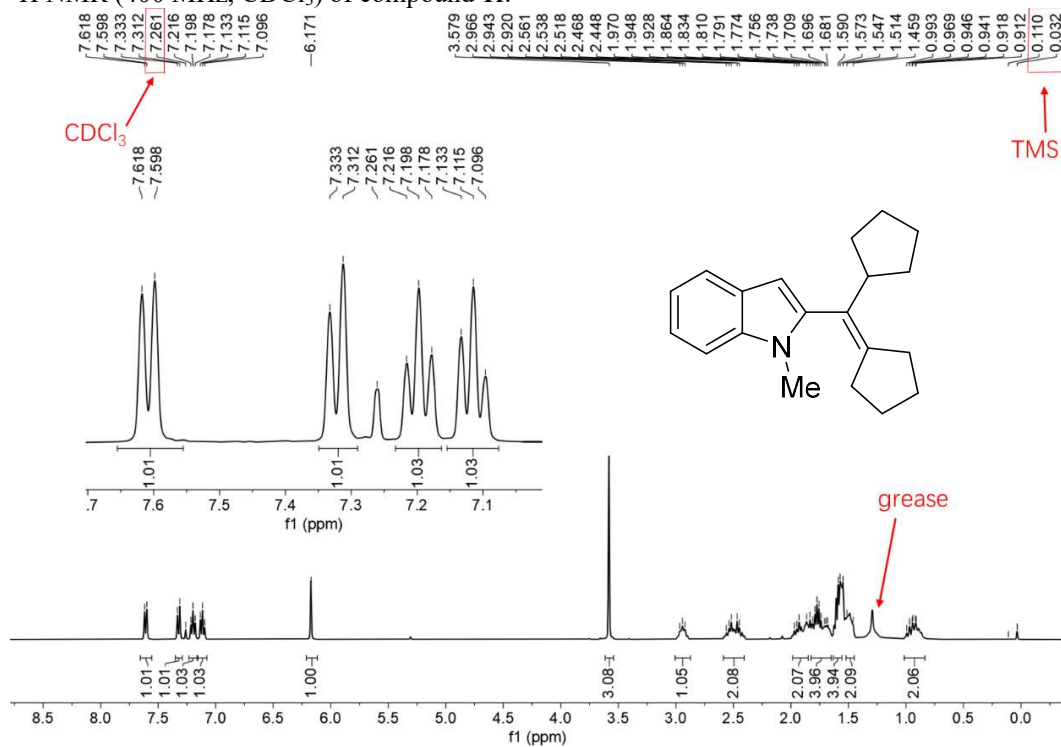

$^{13}\text{C}$  NMR (100 MHz,  $\text{CDCl}_3$ ) of compound **1f**:

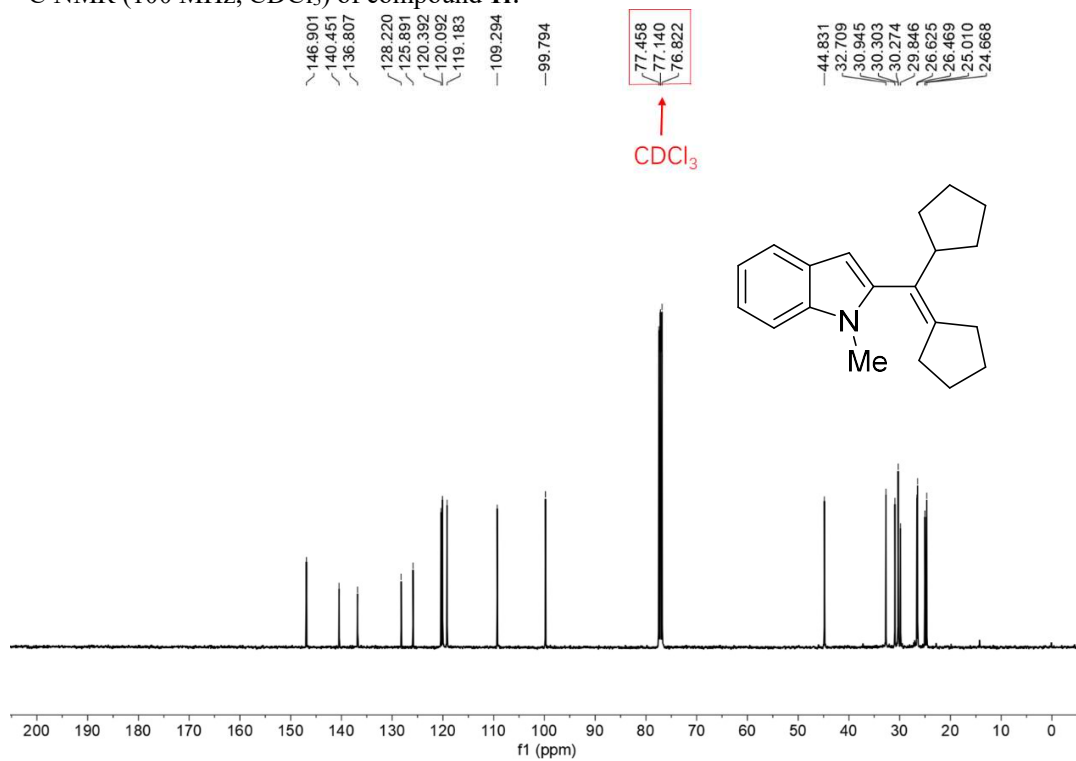

$^1\text{H}$  NMR (400 MHz,  $\text{CDCl}_3$ ) of compound **1g**:

A

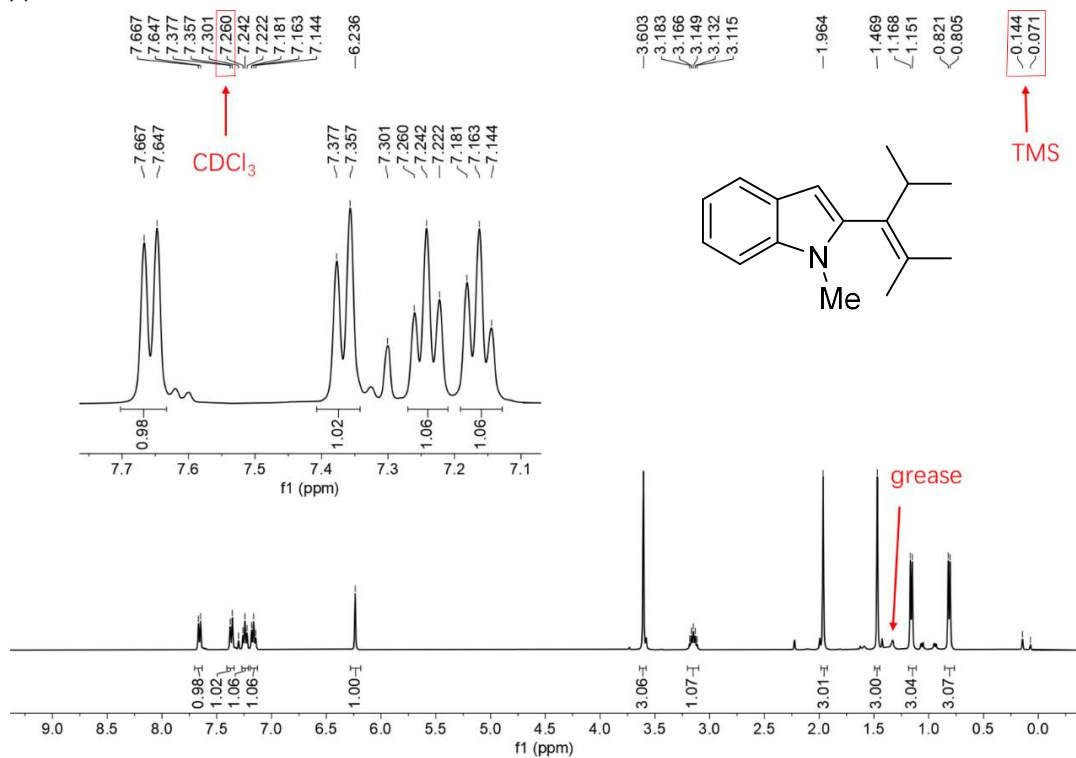

$^{13}\text{C}$  NMR (100 MHz,  $\text{CDCl}_3$ ) of compound **1g**:

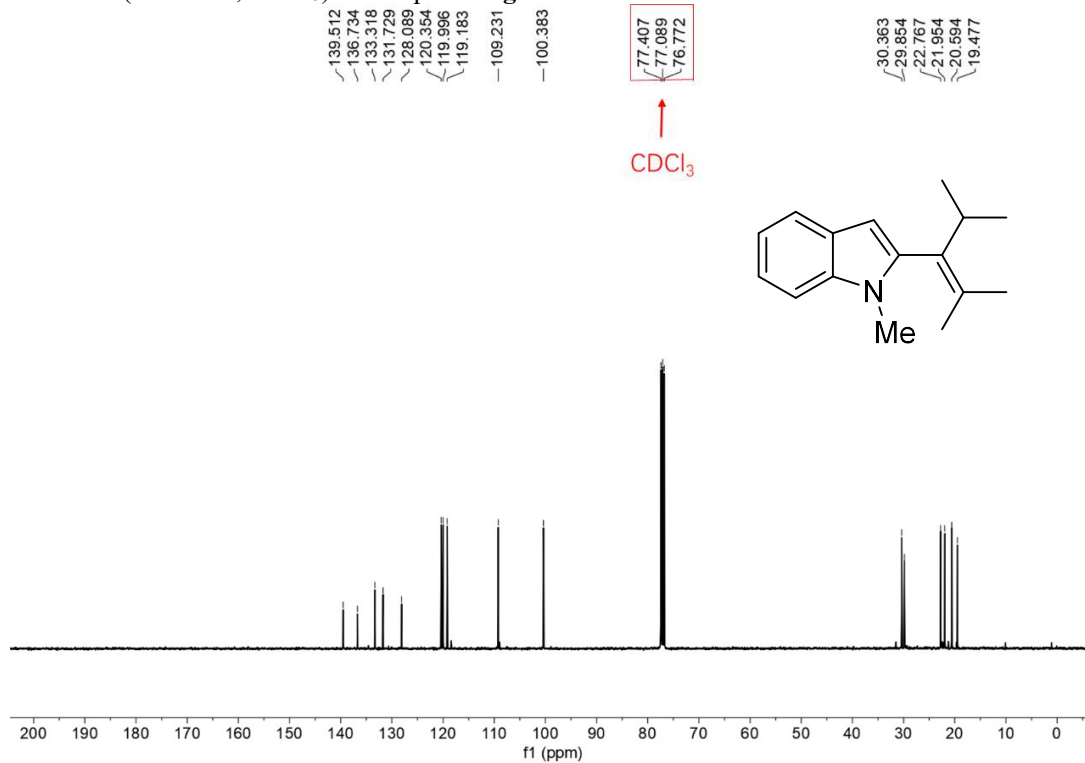



<sup>1</sup>H NMR (400 MHz, CDCl<sub>3</sub>) of compound **1h**:

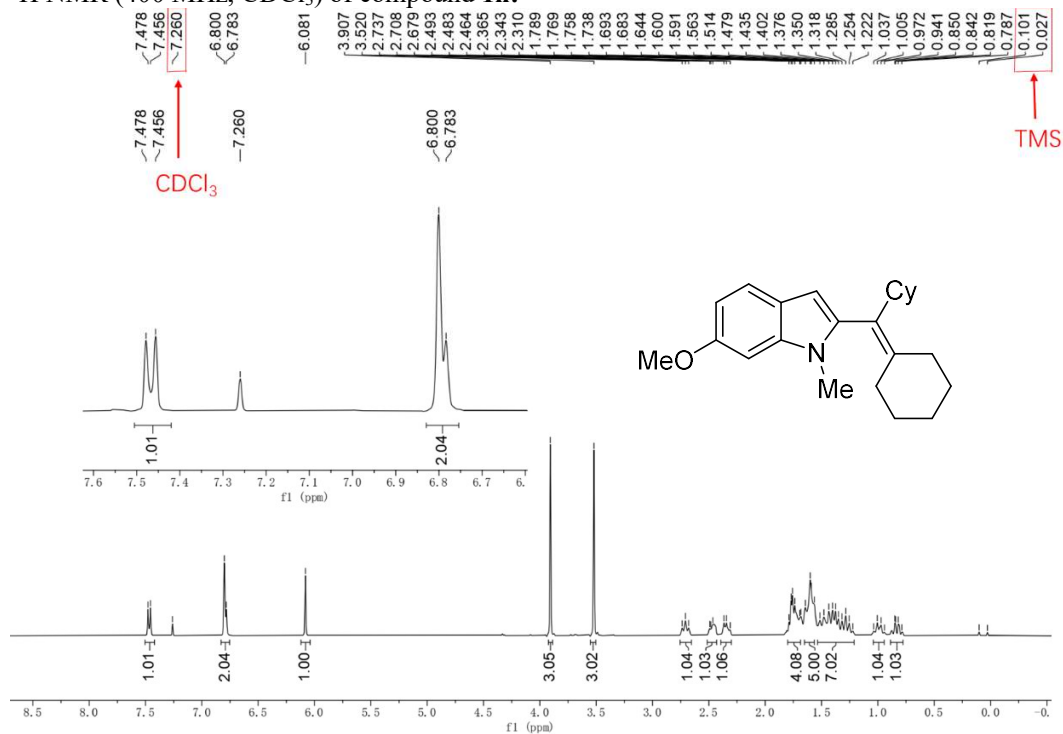

<sup>13</sup>C NMR (100 MHz, CDCl<sub>3</sub>) of compound **1h**:

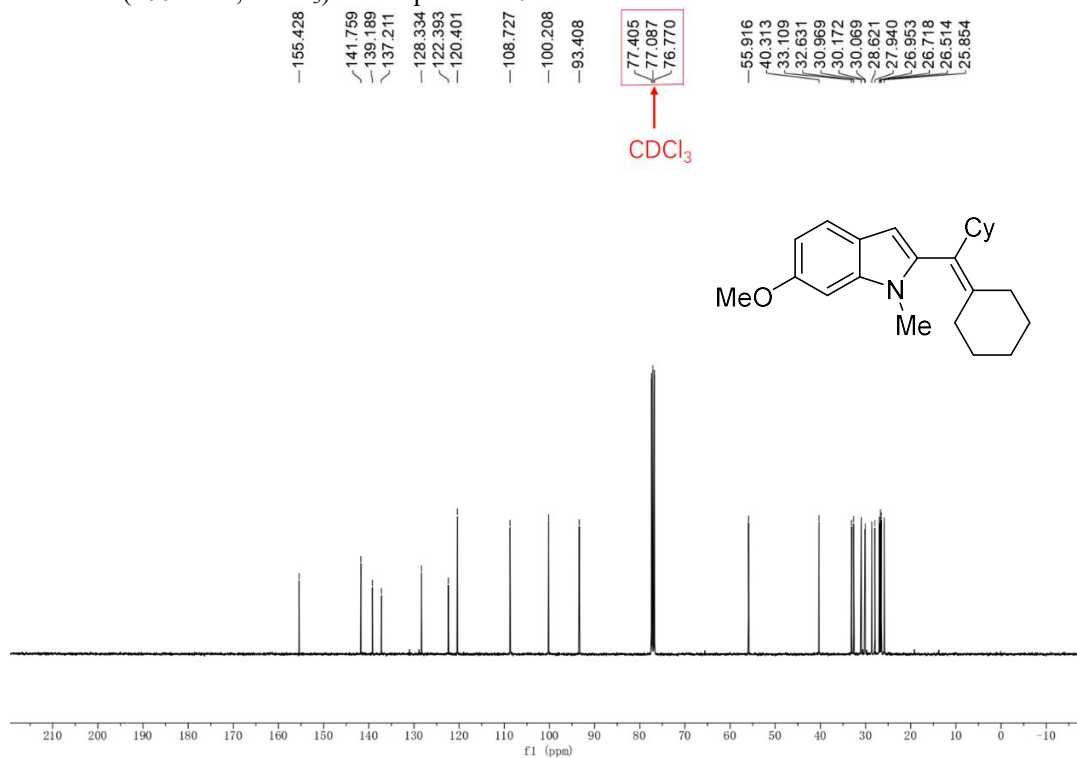

### 13. NMR spectra of compounds 3, 4, 8-10, 13 and S12

$^1\text{H}$  NMR (400 MHz,  $\text{CDCl}_3$ ) of compound **3aa** (inseparable diastereomers with 95:5 dr):

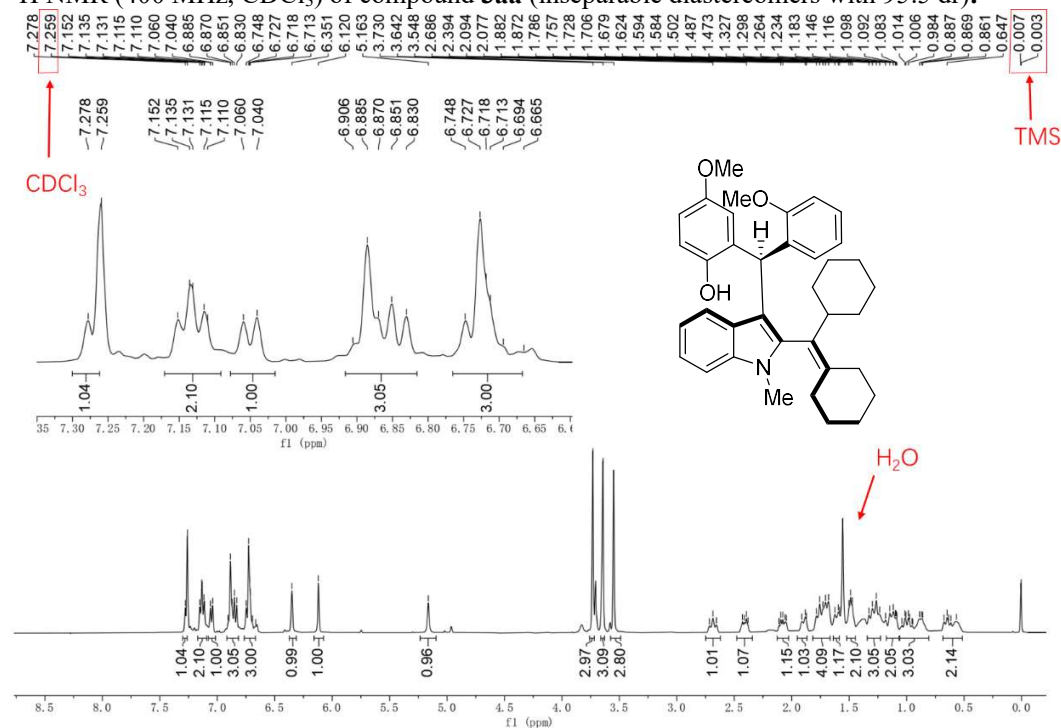

$^{13}\text{C}$  NMR (100 MHz,  $\text{CDCl}_3$ ) of compound **3aa**:

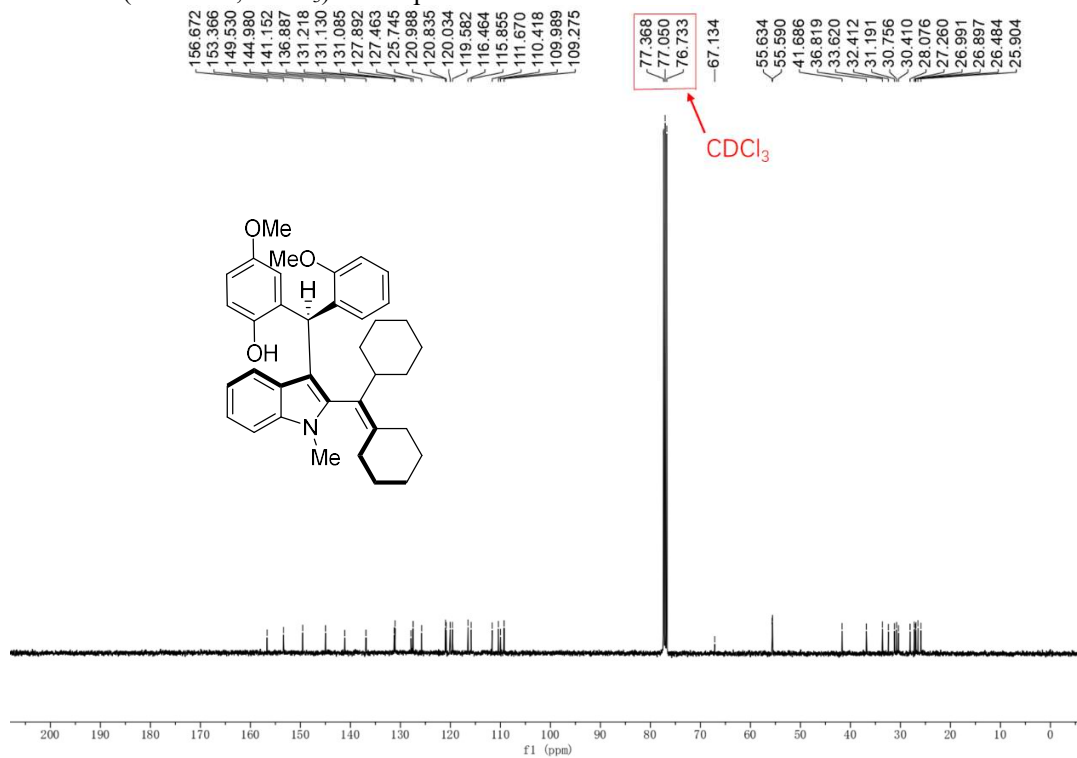

$^1\text{H}$  NMR (400 MHz,  $\text{CDCl}_3$ ) of compound **3ab**:

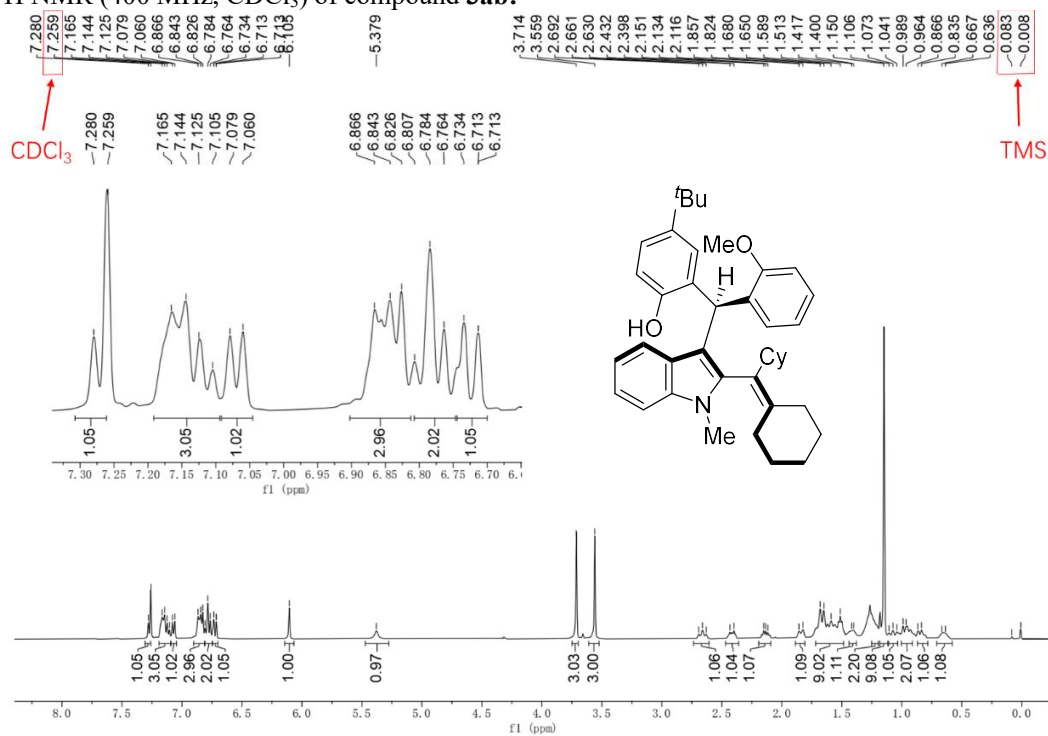

$^{13}\text{C}$  NMR (100 MHz,  $\text{CDCl}_3$ ) of compound **3ab**:

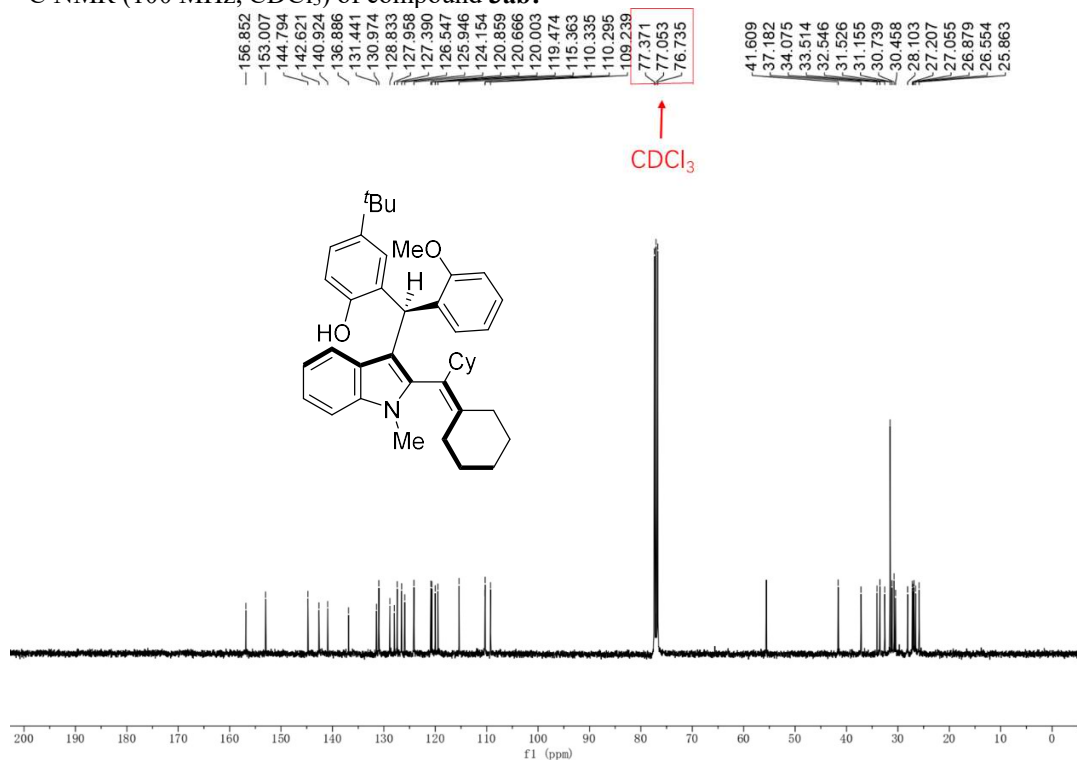

<sup>1</sup>H NMR (400 MHz, CDCl<sub>3</sub>) of compound **3ac**:

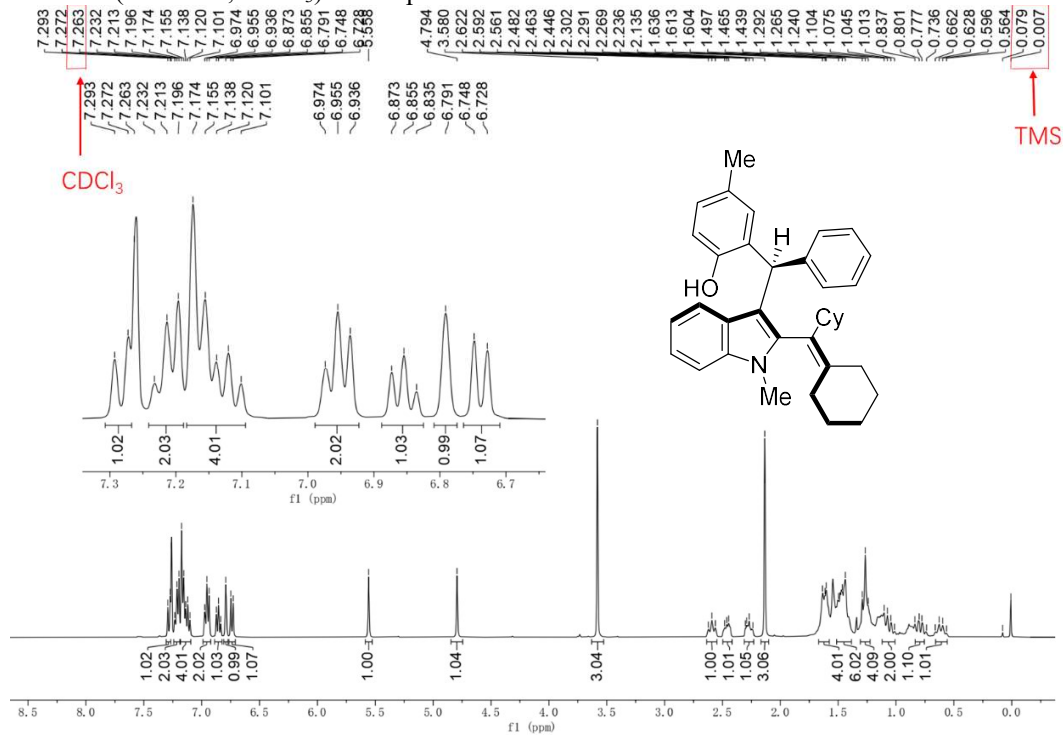

<sup>13</sup>C NMR (100 MHz, CDCl<sub>3</sub>) of compound **3ac**:

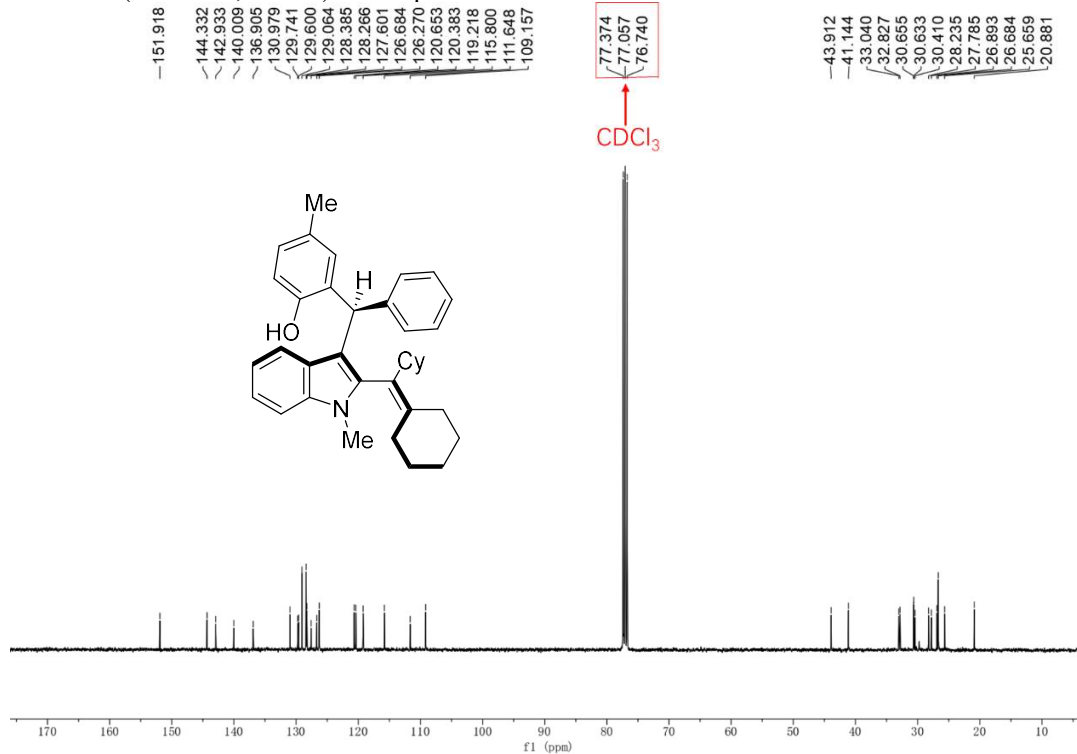

$^1\text{H}$  NMR (400 MHz,  $\text{CDCl}_3$ ) of compound **3ad**: (inseparable diastereomers with 90:10 dr)

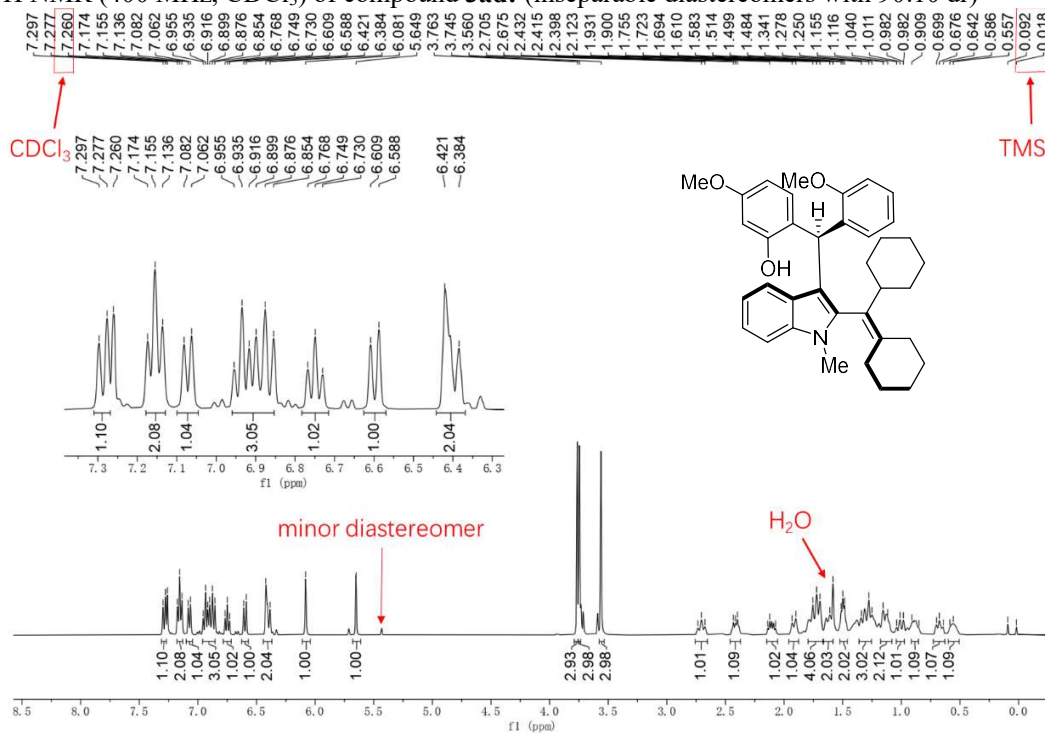

$^{13}\text{C}$  NMR (100 MHz,  $\text{CDCl}_3$ ) of compound **3ad**:

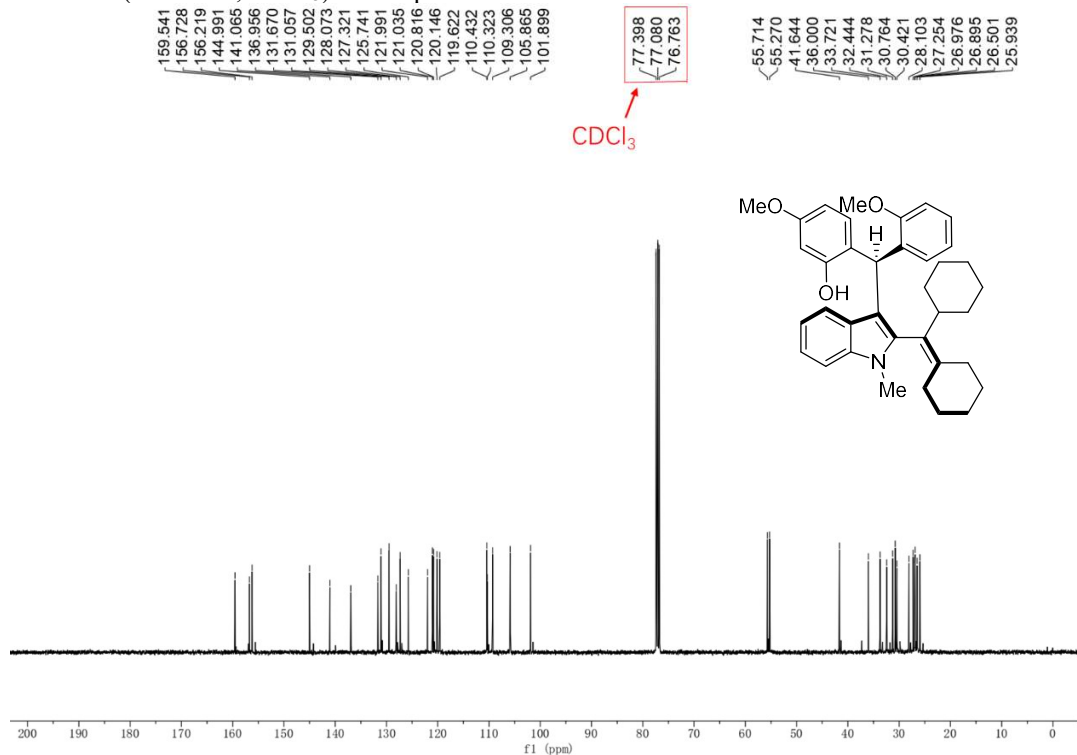

<sup>1</sup>H NMR (400 MHz, CDCl<sub>3</sub>) of compound **3ae**:

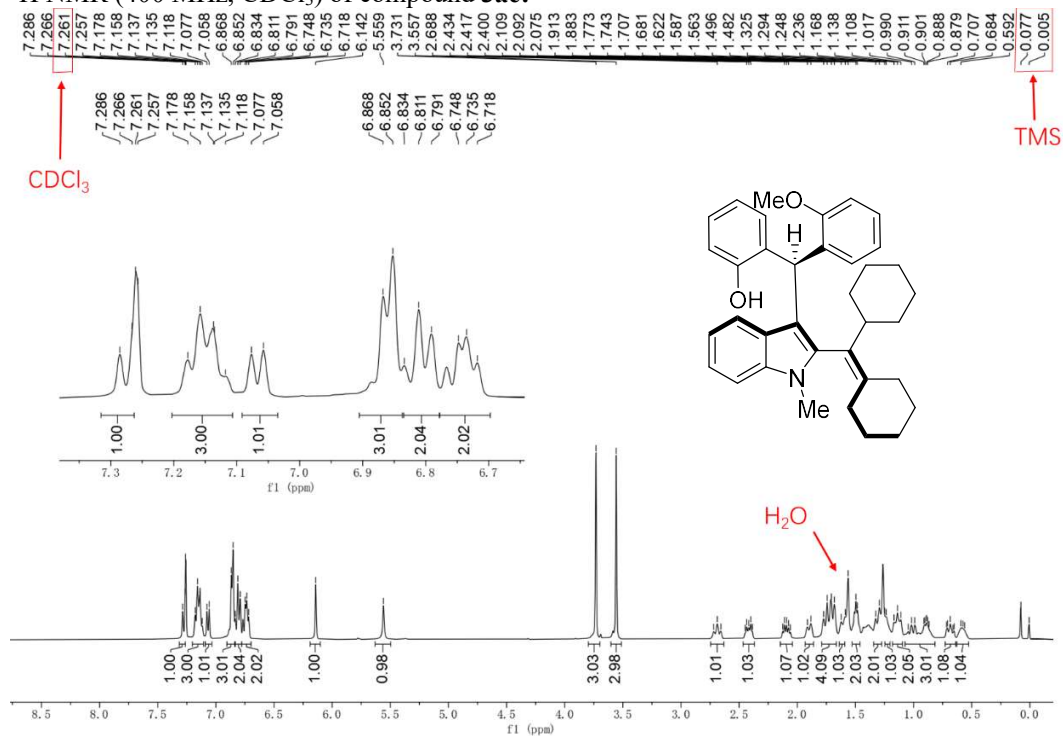

<sup>13</sup>C NMR (100 MHz, CDCl<sub>3</sub>) of compound **3ae**:

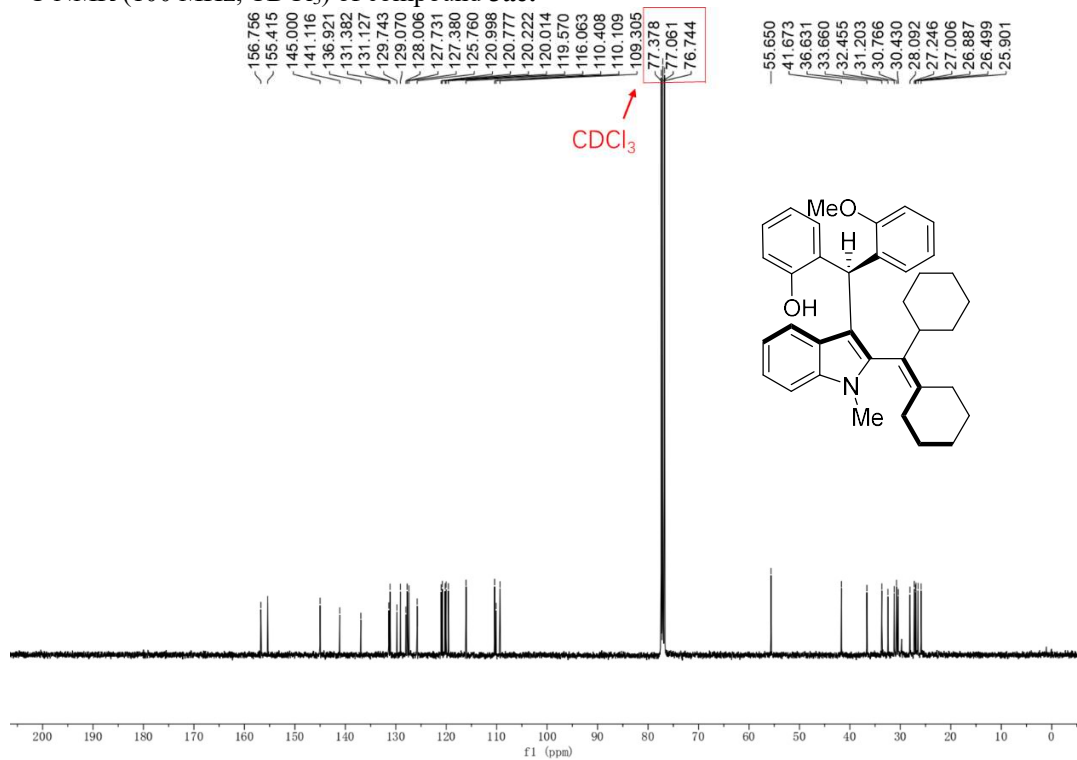

$^1\text{H}$  NMR (400 MHz,  $\text{CDCl}_3$ ) of compound **3af** (inseparable diastereomers with 85:15 dr):

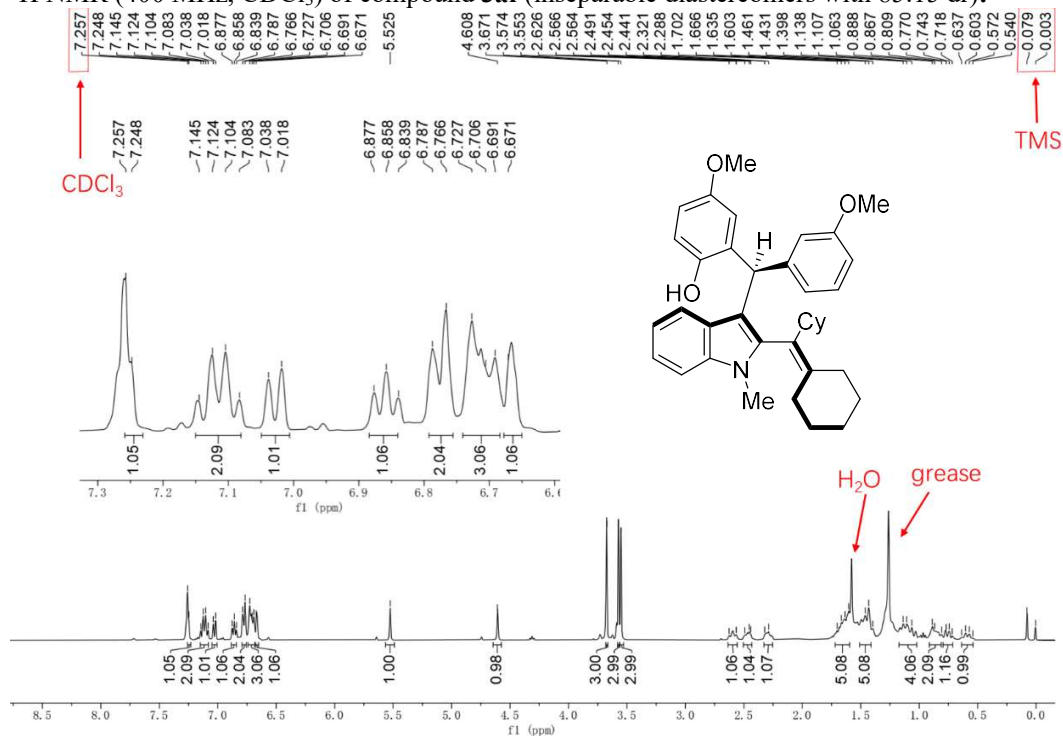

$^{13}\text{C}$  NMR (100 MHz,  $\text{CDCl}_3$ ) of compound **3af**:

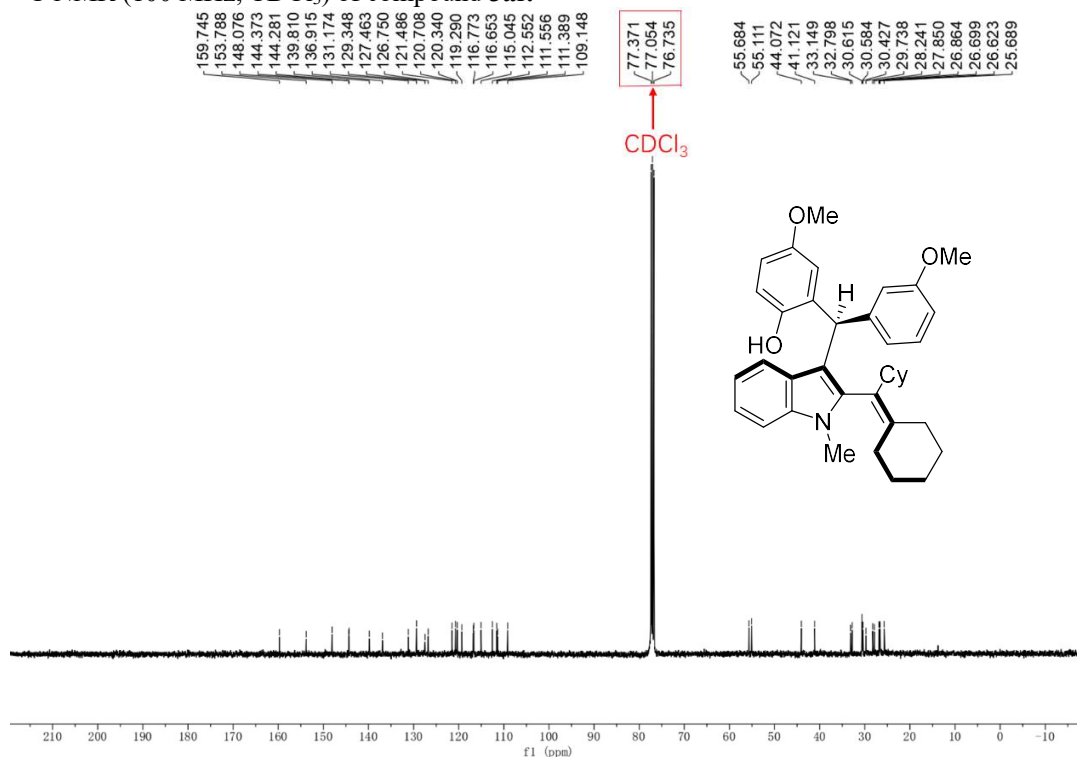

<sup>1</sup>H NMR (400 MHz, CDCl<sub>3</sub>) of compound **3ag**:

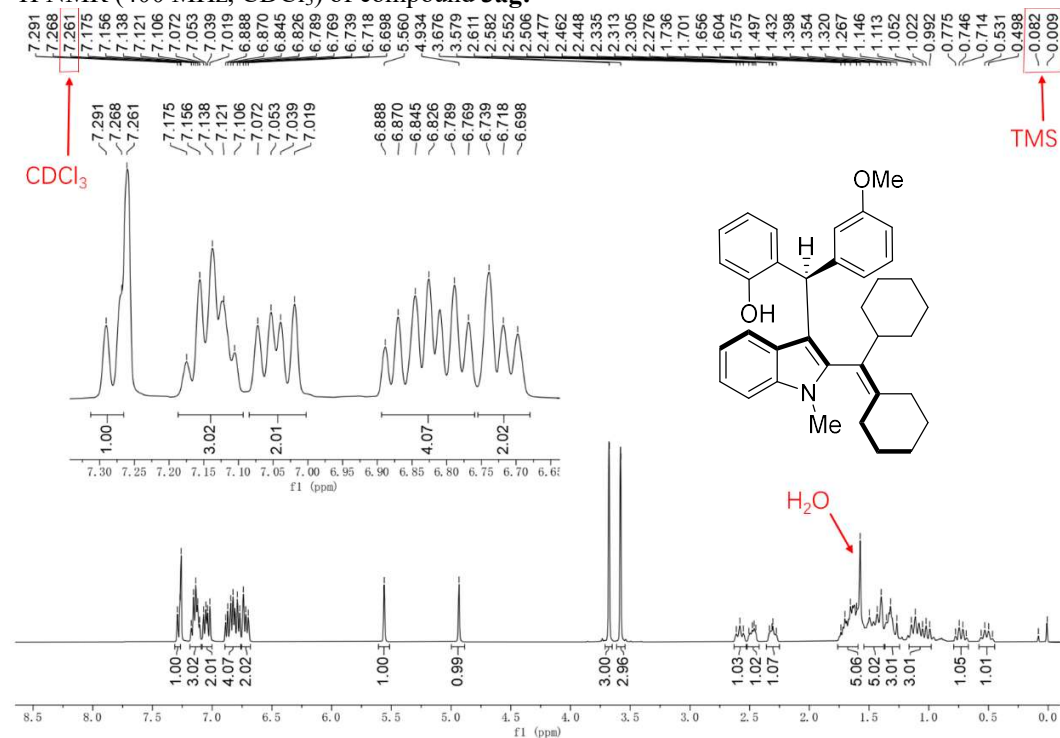

<sup>13</sup>C NMR (100 MHz, CDCl<sub>3</sub>) of compound **3ag**:

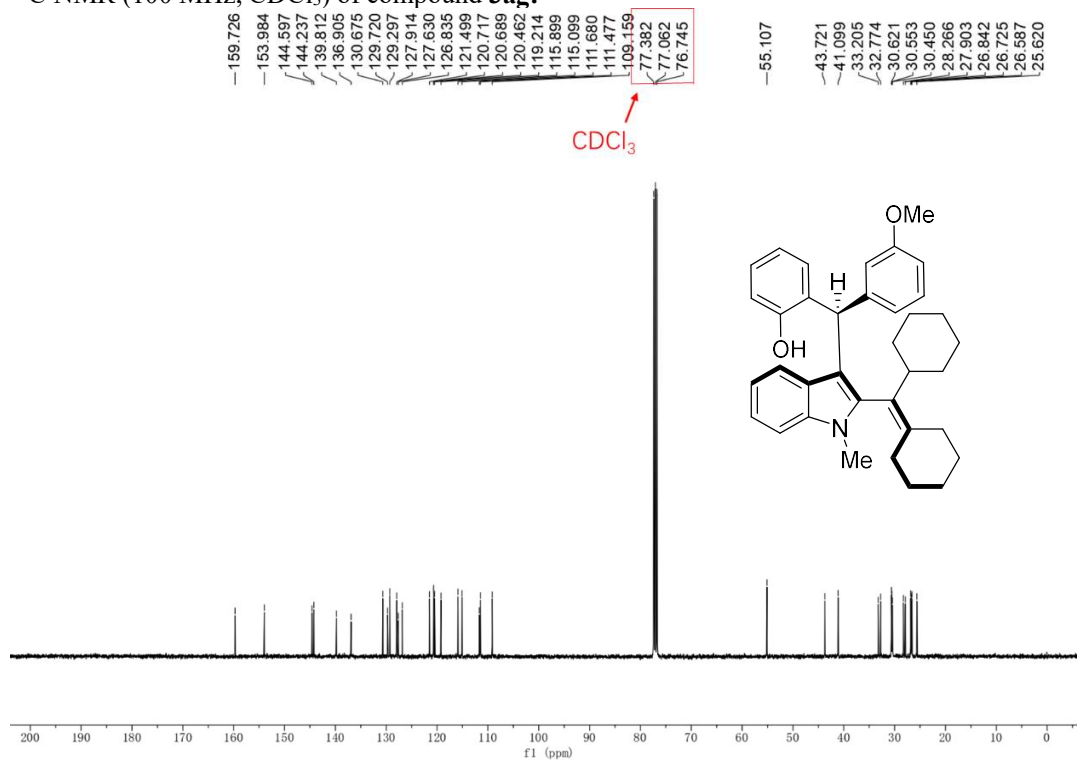



$^1\text{H}$  NMR (400 MHz,  $\text{CDCl}_3$ ) of compound **3ah**:

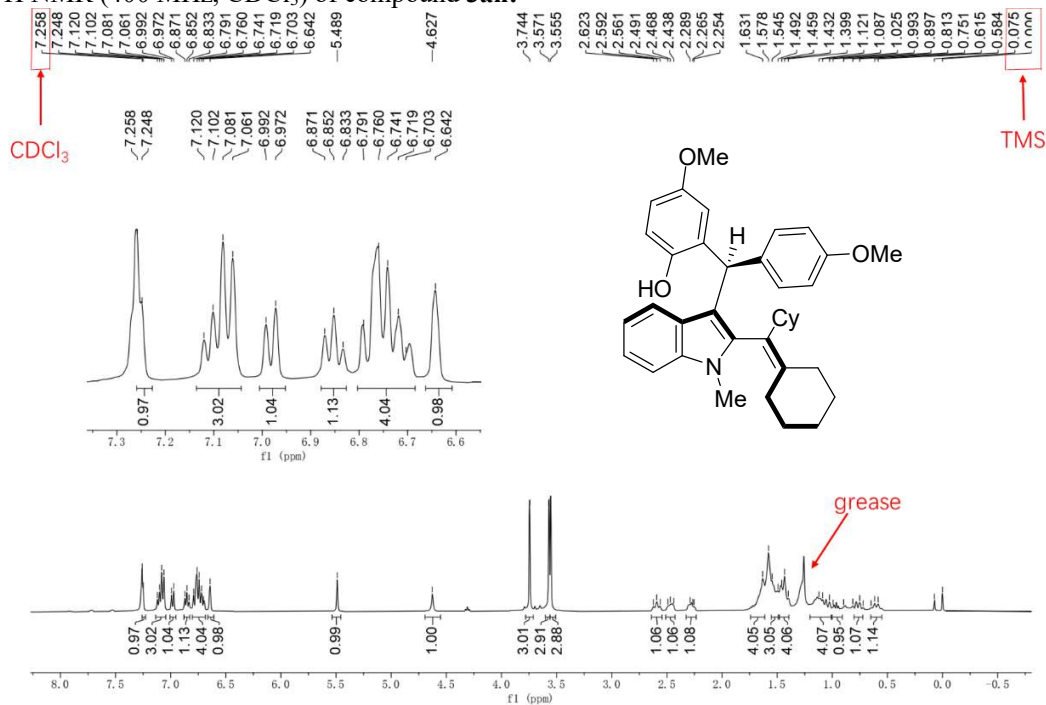

$^{13}\text{C}$  NMR (100 MHz,  $\text{CDCl}_3$ ) of compound **3ah**:

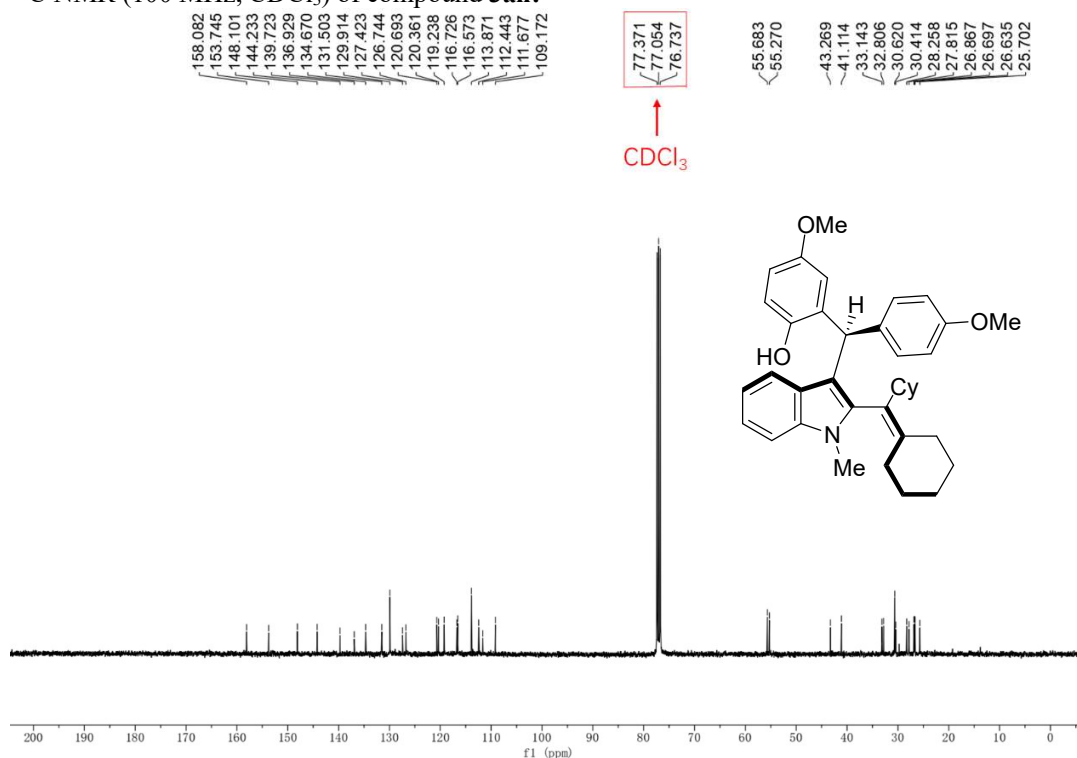

<sup>1</sup>H NMR (400 MHz, CDCl<sub>3</sub>) of compound **3ai**:

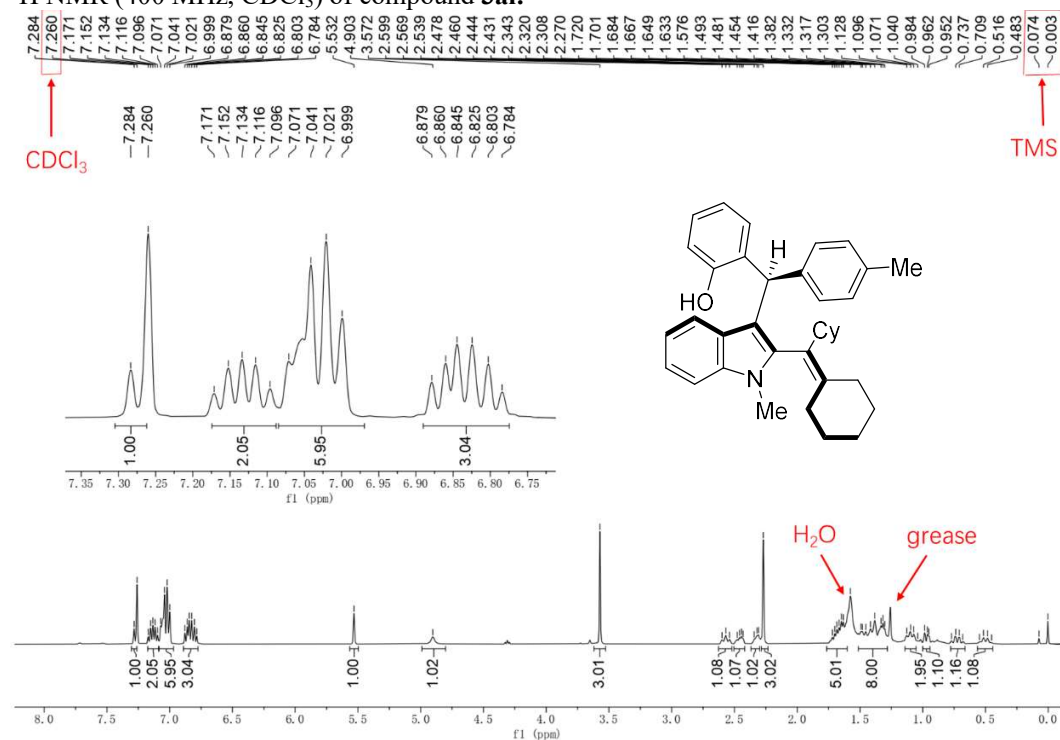

<sup>13</sup>C NMR (100 MHz, CDCl<sub>3</sub>) of compound **3ai**:

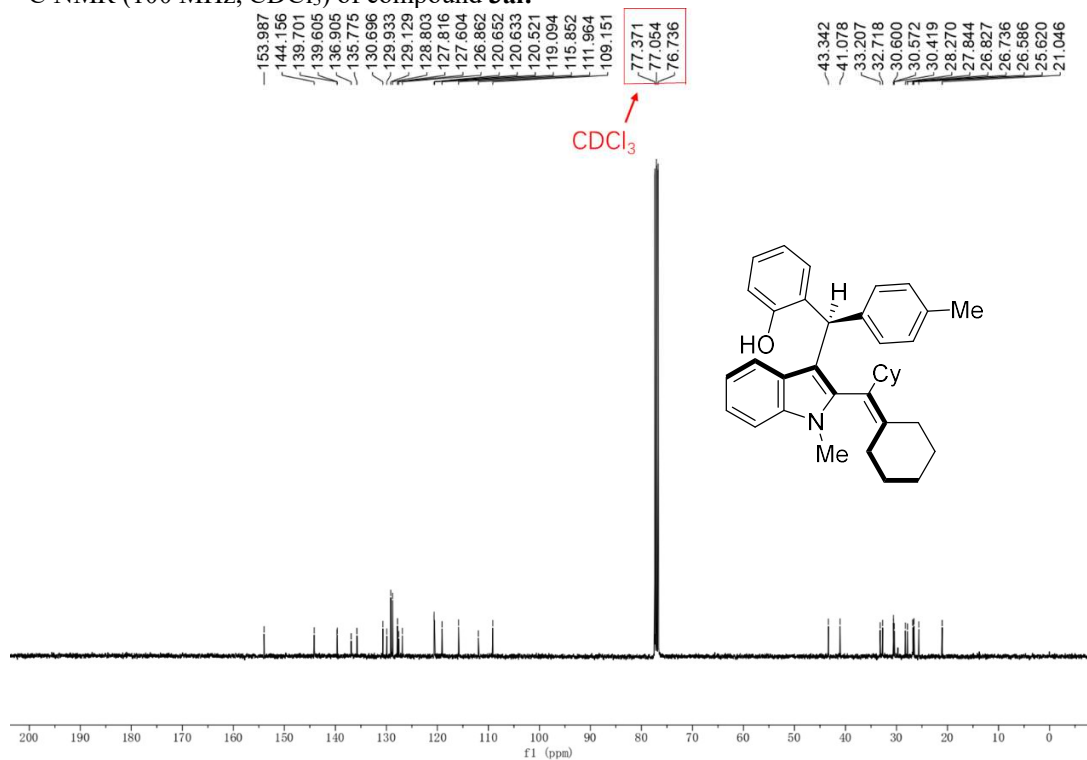

$^1\text{H}$  NMR (400 MHz,  $\text{CDCl}_3$ ) of compound **3aj** (inseparable diastereomers with 82:18 dr):

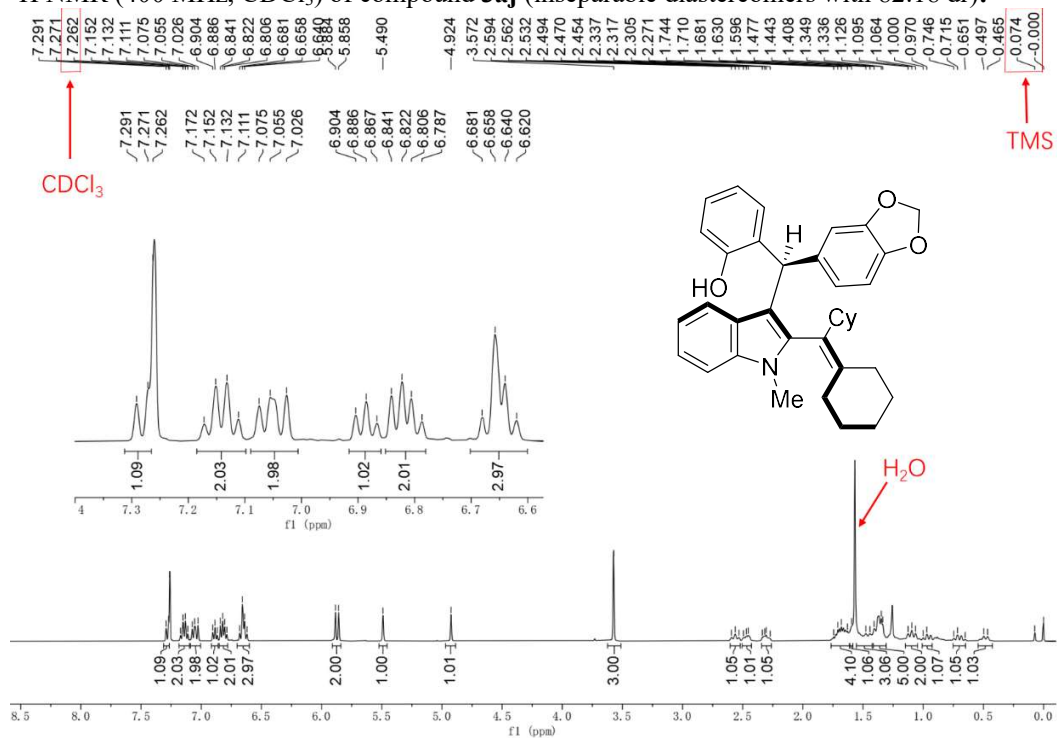

$^{13}\text{C}$  NMR (100 MHz,  $\text{CDCl}_3$ ) of compound **3aj**:

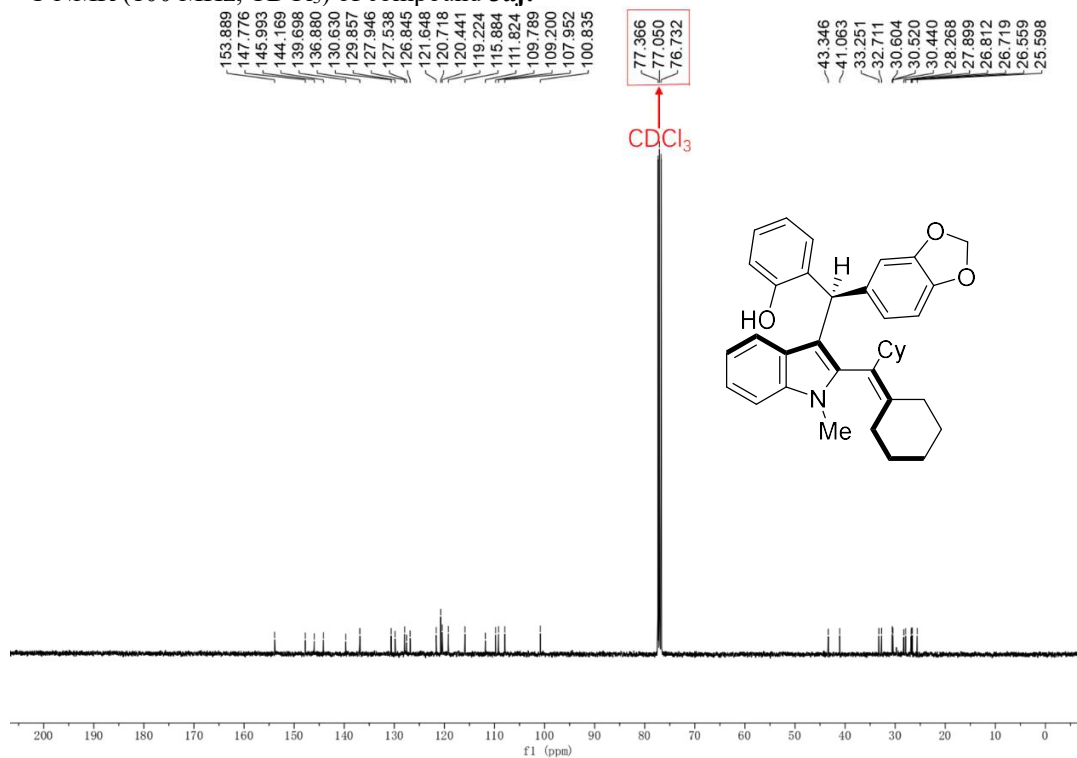

<sup>1</sup>H NMR (400 MHz, CDCl<sub>3</sub>) of compound **3ak**:

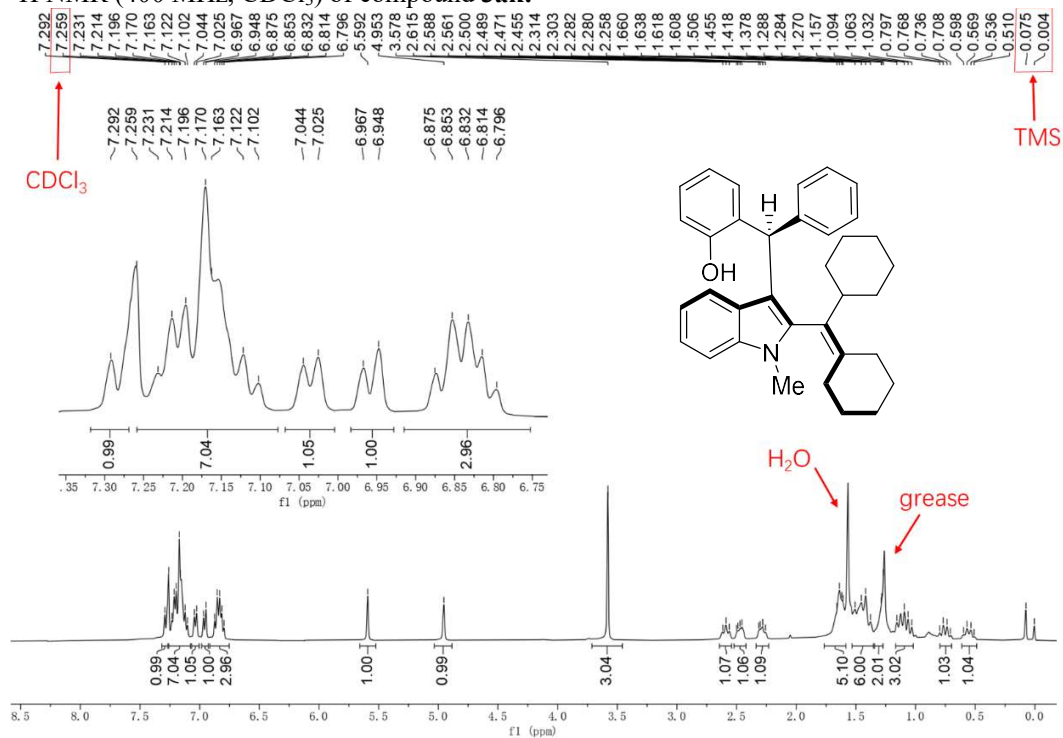

<sup>13</sup>C NMR (100 MHz, CDCl<sub>3</sub>) of compound **3ak**:

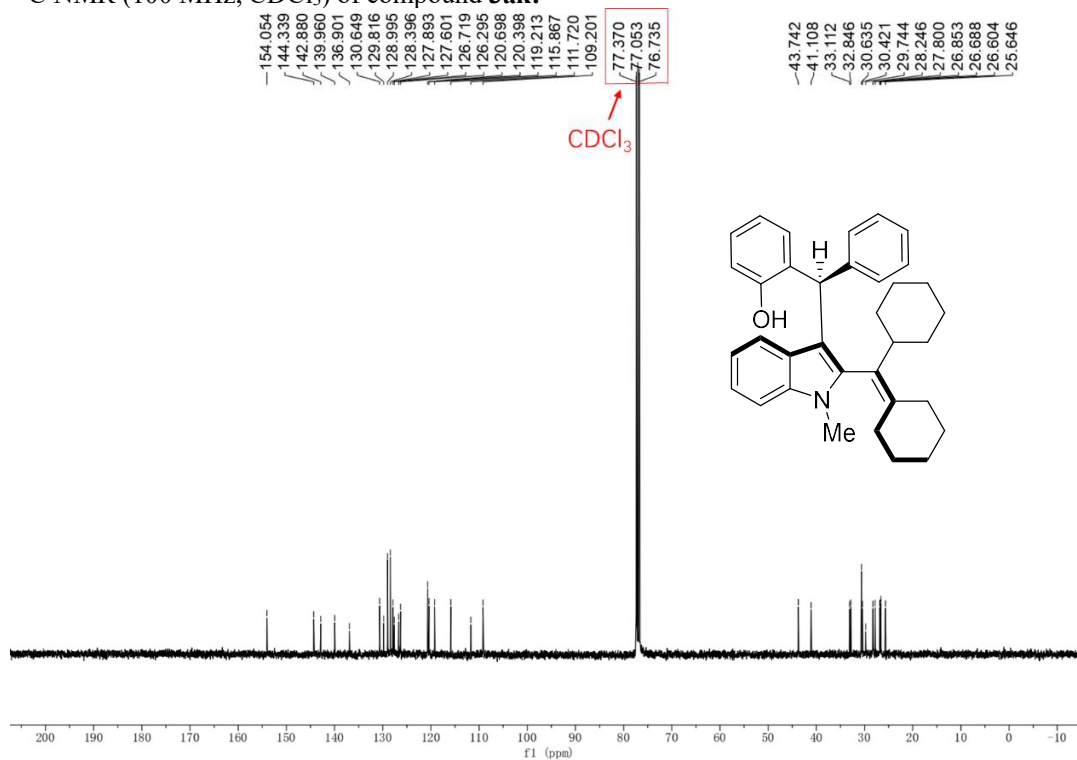

$^1\text{H}$  NMR (400 MHz,  $\text{CDCl}_3$ ) of compound **3ba** (inseparable diastereomers with 89:11 dr):

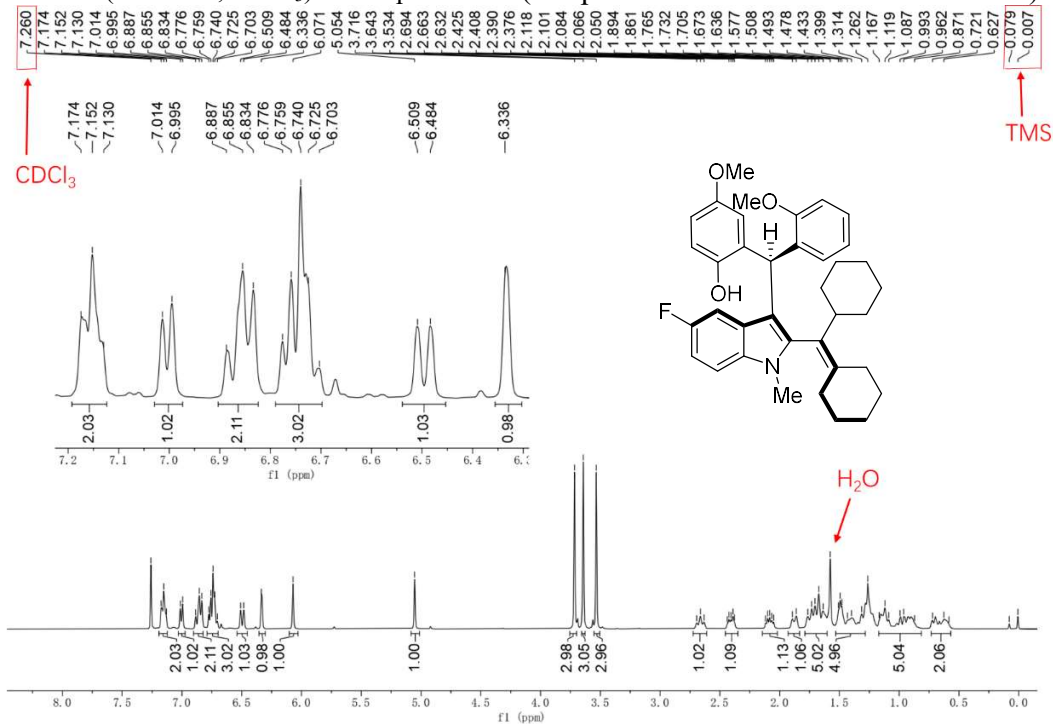

$^{13}\text{C}$  NMR (100 MHz,  $\text{CDCl}_3$ ) of compound **3ba**:

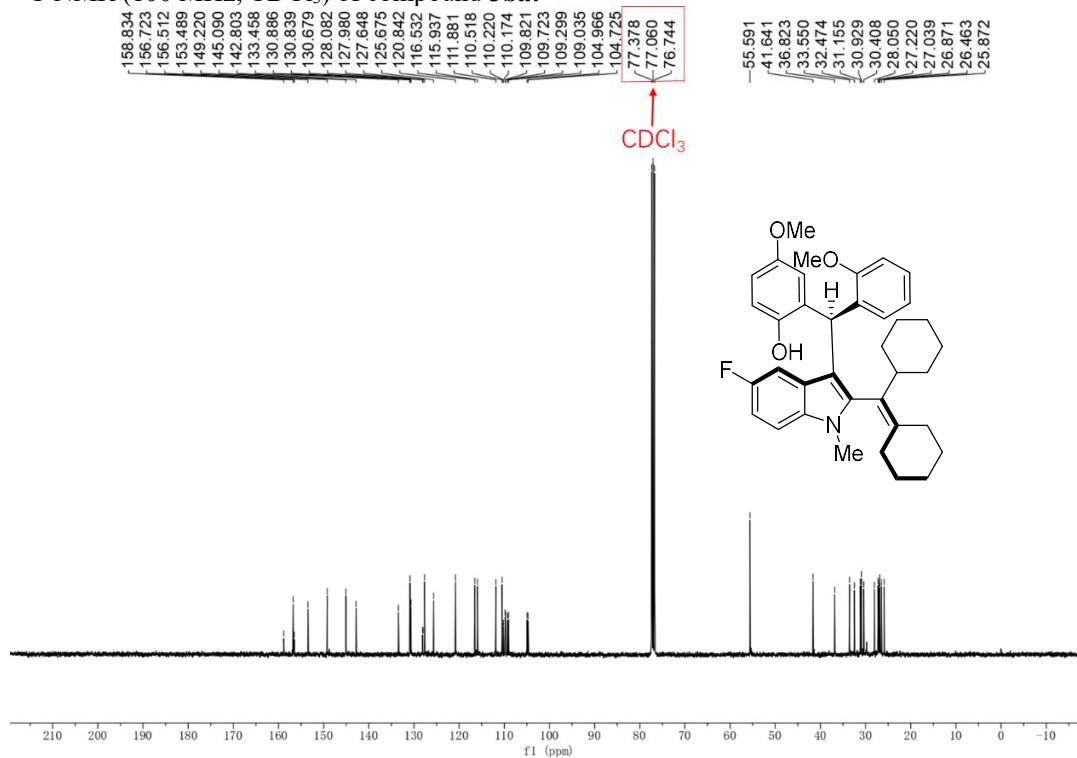

$^{19}\text{F}$  NMR (376 MHz,  $\text{CDCl}_3$ ) of compound **3ba**:

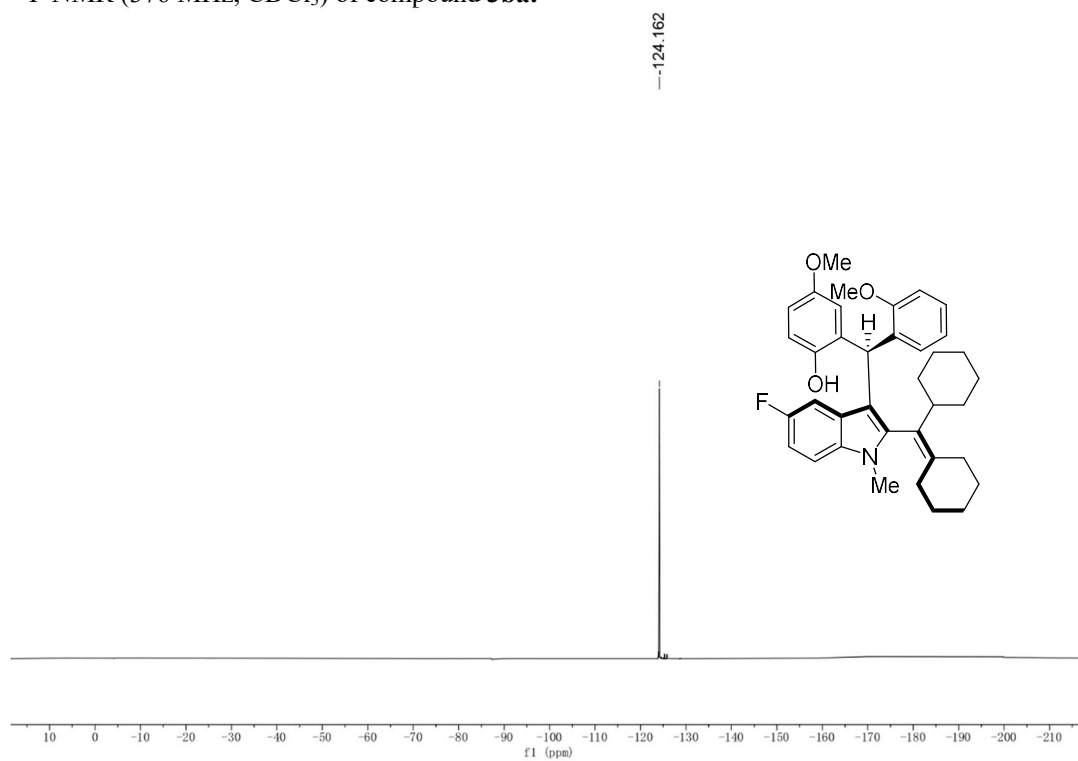

<sup>1</sup>H NMR (400 MHz, CDCl<sub>3</sub>) of compound **3bi**:

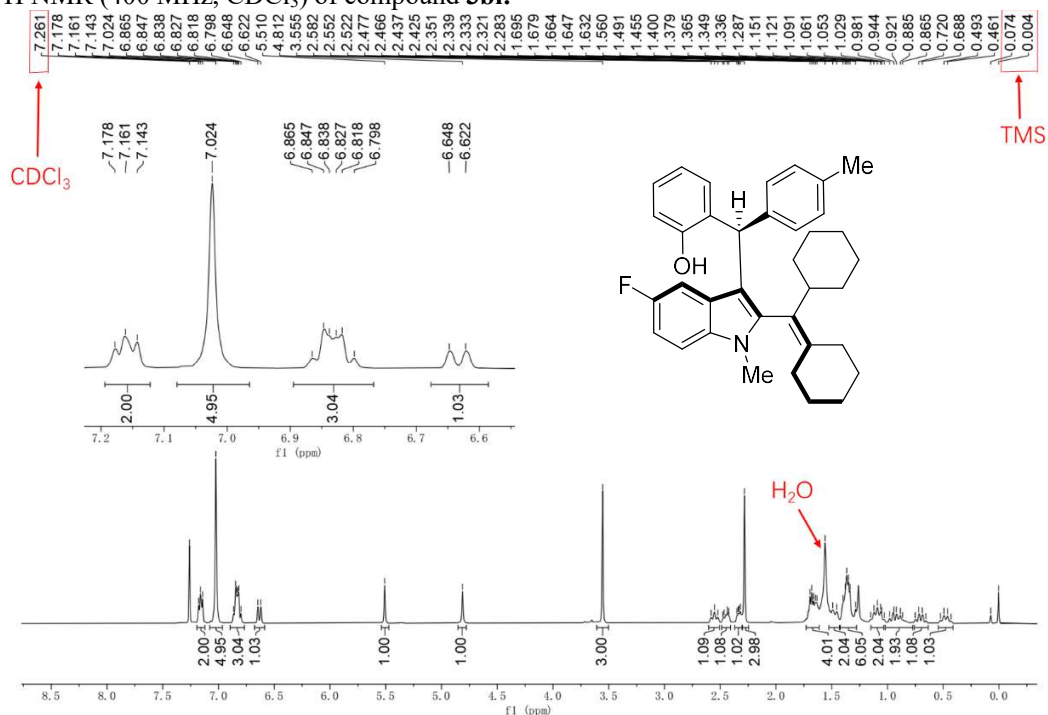

<sup>13</sup>C NMR (100 MHz, CDCl<sub>3</sub>) of compound **3bi**:

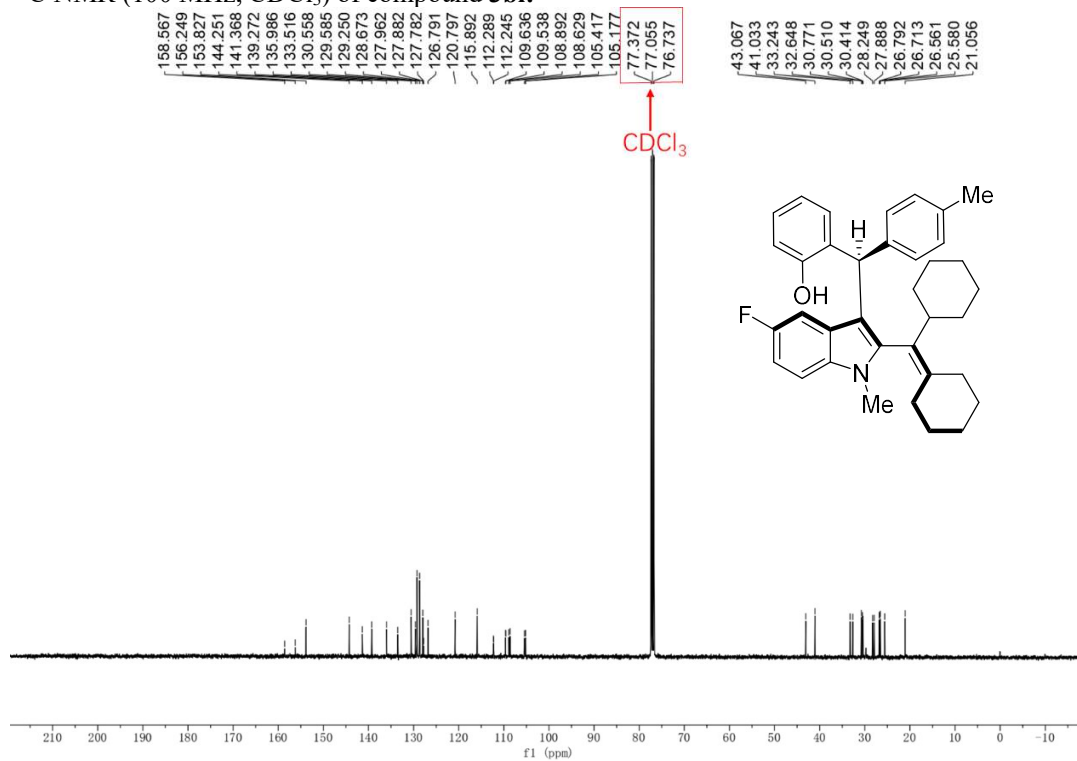

$^{19}\text{F}$  NMR (376 MHz,  $\text{CDCl}_3$ ) of compound **3bi**:

---124.735

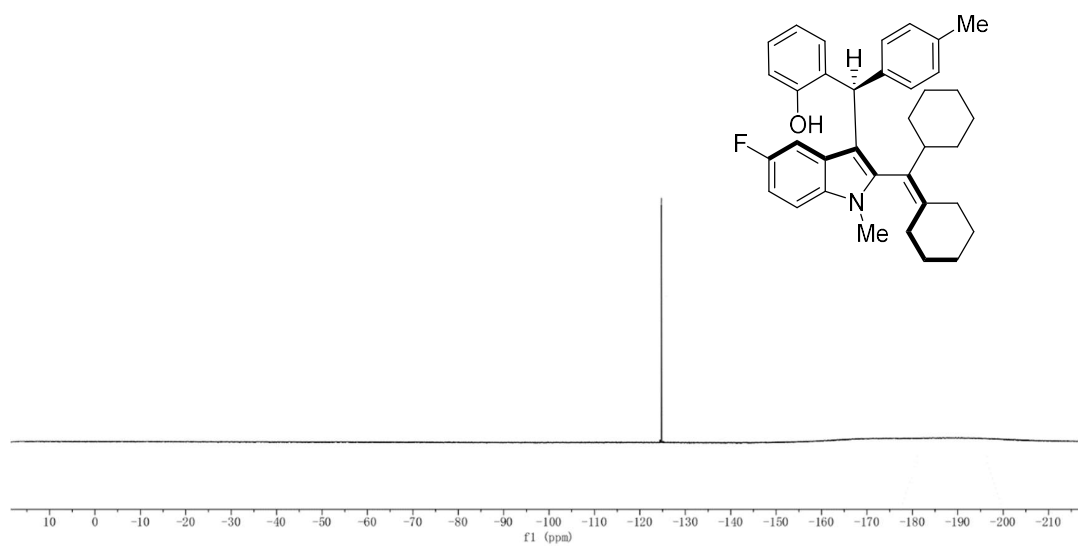



$^1\text{H}$  NMR (400 MHz,  $\text{CDCl}_3$ ) of compound **3ca**:

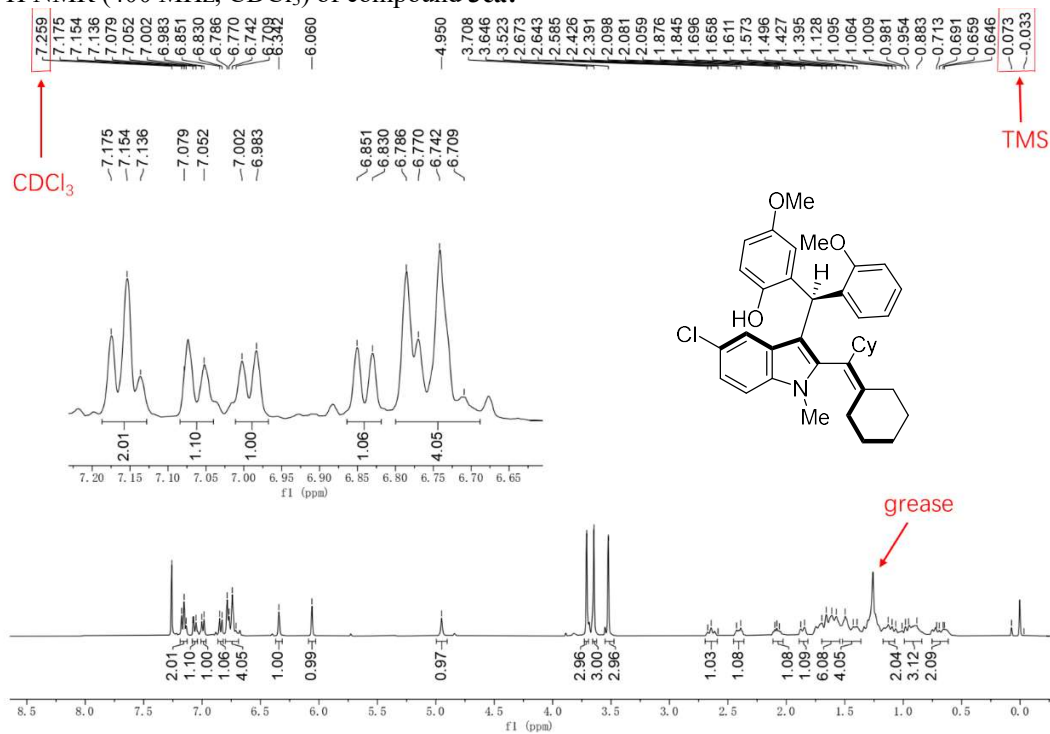

$^{13}\text{C}$  NMR (100 MHz,  $\text{CDCl}_3$ ) of compound **3ca**:

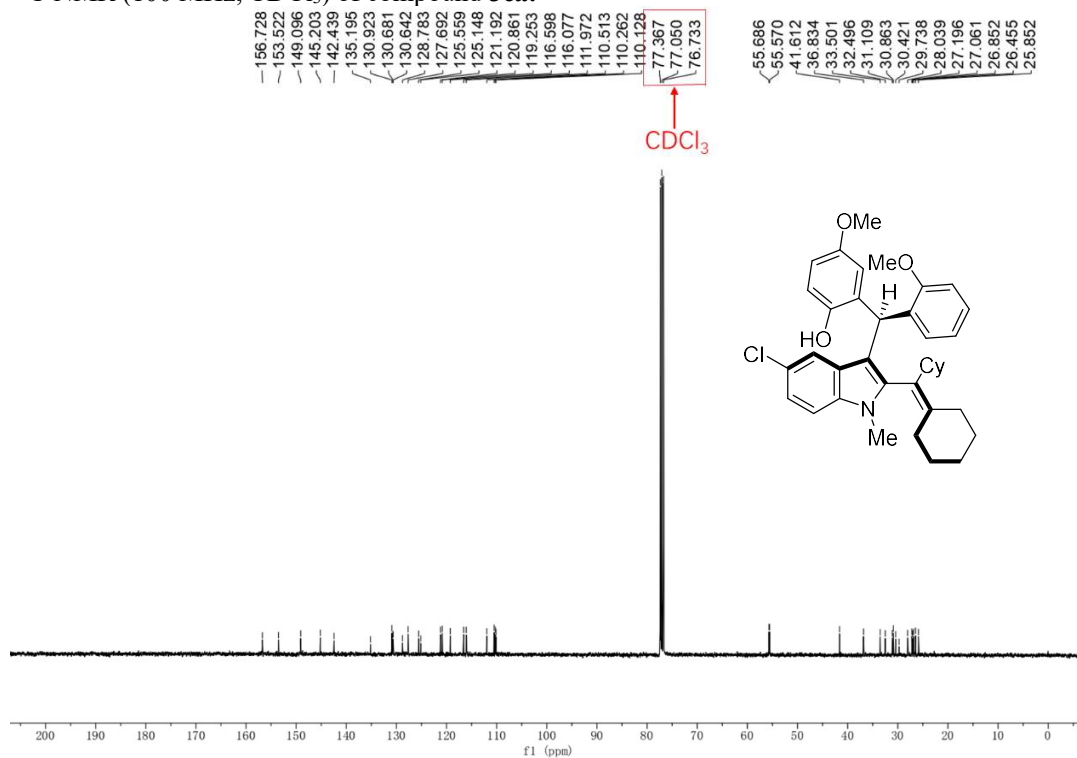

$^1\text{H}$  NMR (400 MHz,  $\text{CDCl}_3$ ) of compound **3cc**:

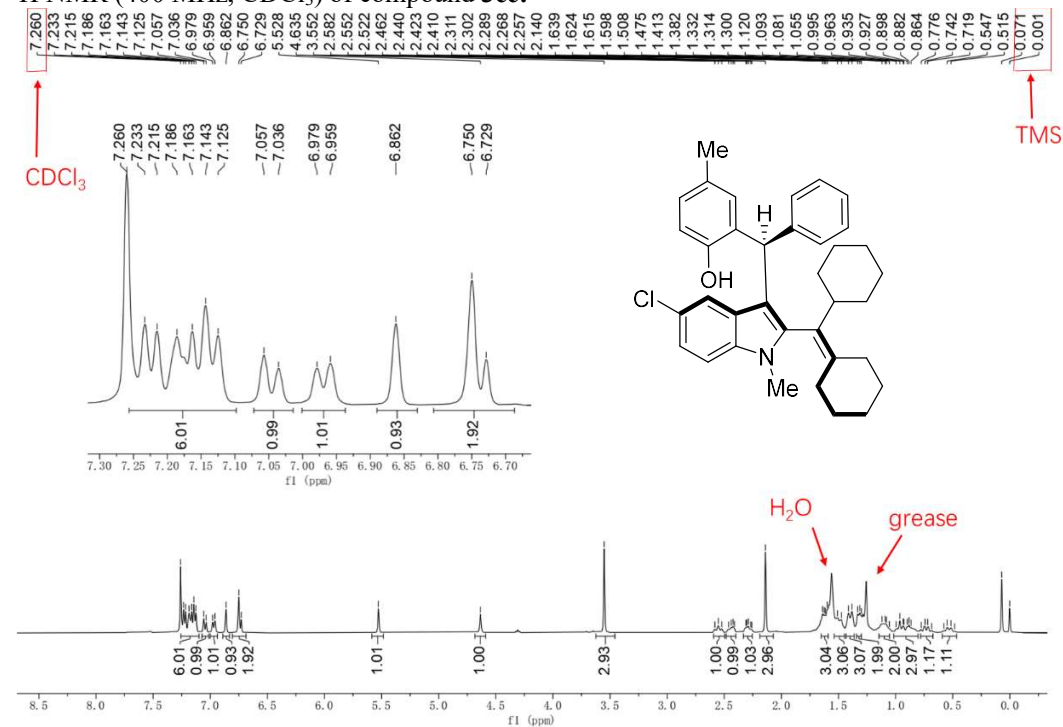

$^{13}\text{C}$  NMR (100 MHz,  $\text{CDCl}_3$ ) of compound **3cc**:

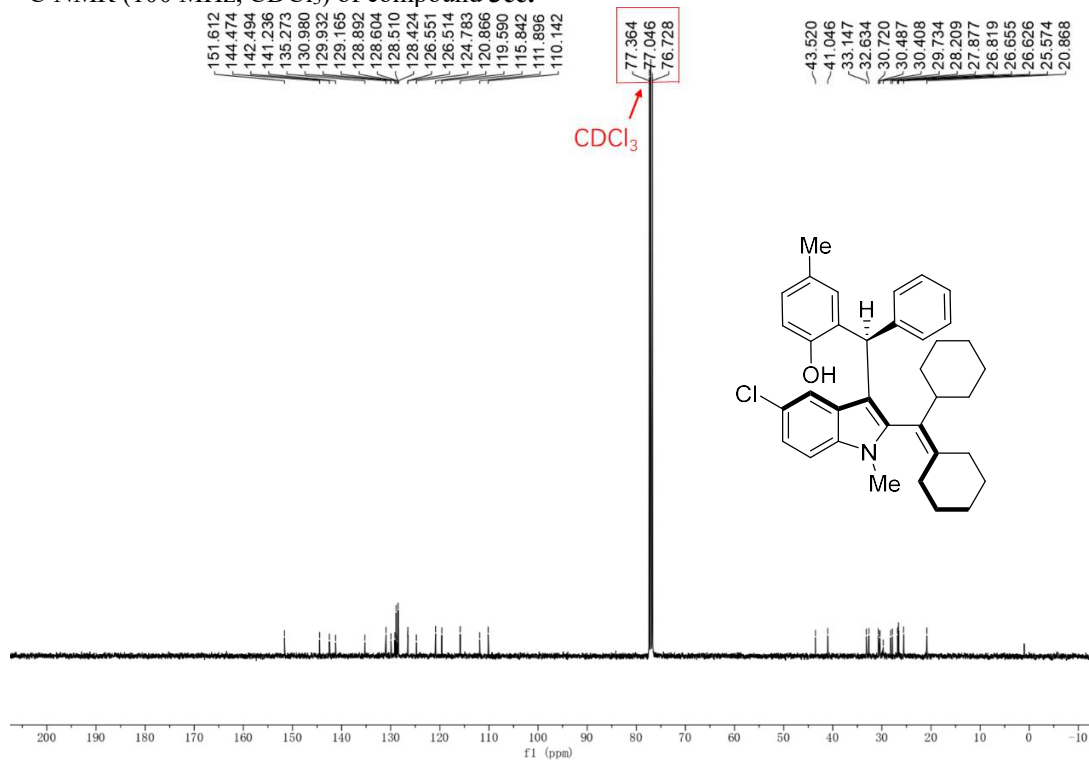

<sup>1</sup>H NMR (400 MHz, CDCl<sub>3</sub>) of compound **3da**:

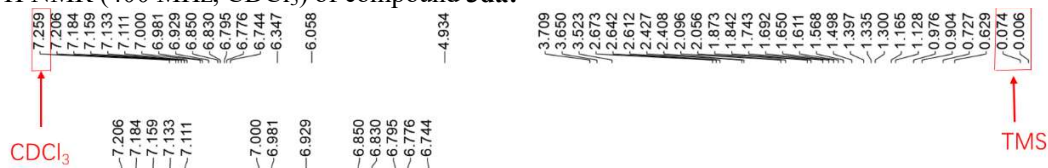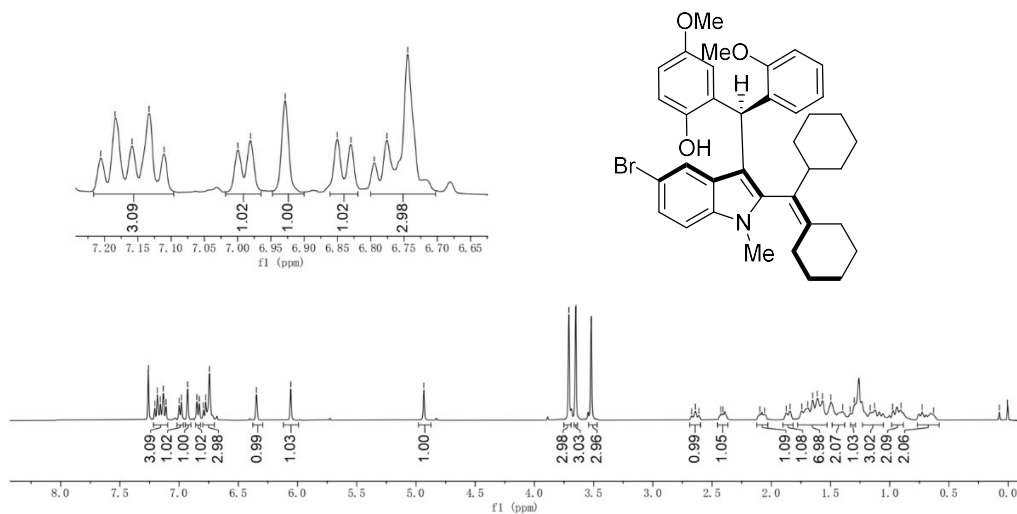

<sup>13</sup>C NMR (100 MHz, CDCl<sub>3</sub>) of compound **3da**:

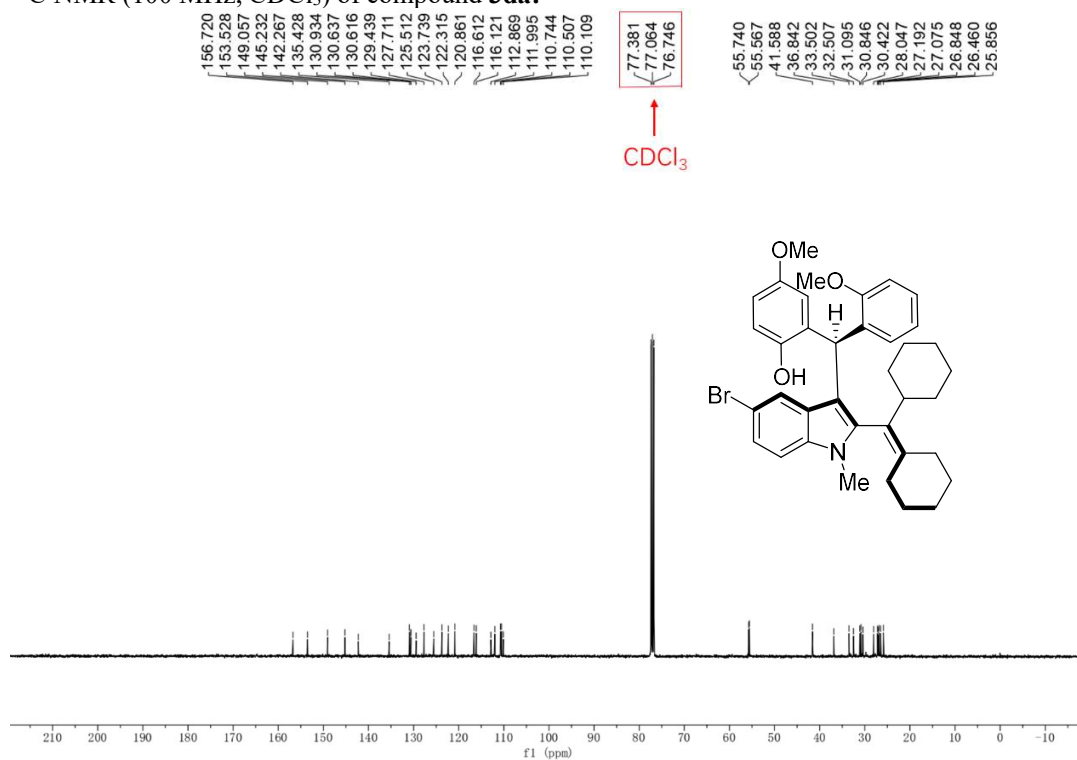

<sup>1</sup>H NMR (400 MHz, CDCl<sub>3</sub>) of compound **3ei**:

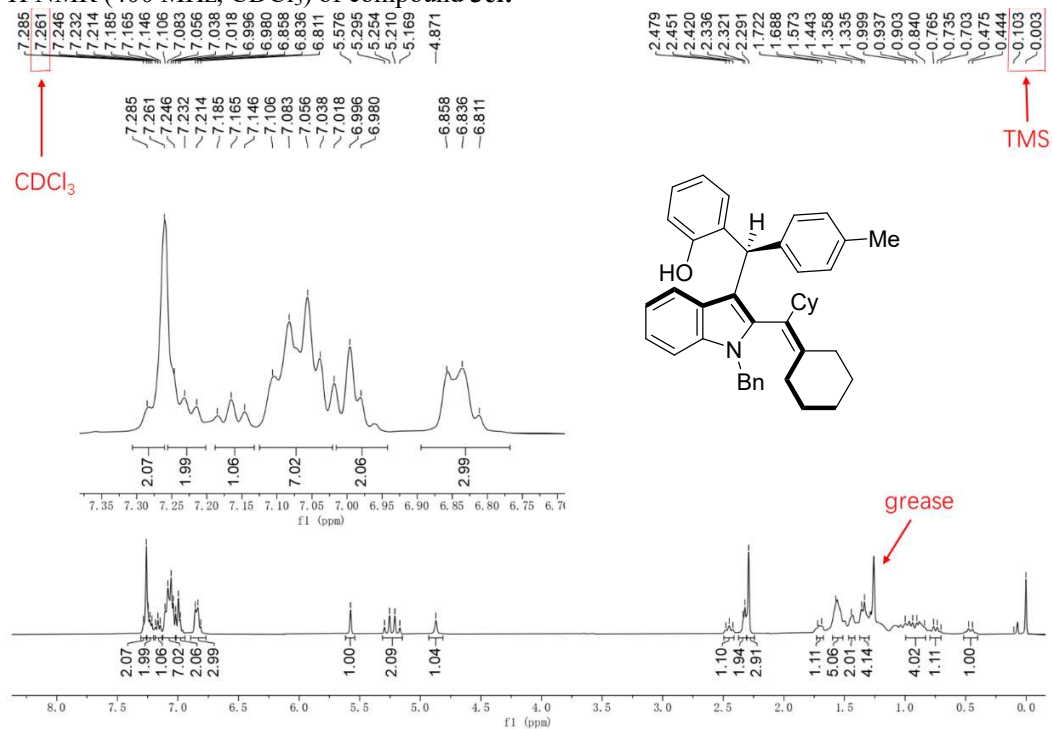

<sup>13</sup>C NMR (100 MHz, CDCl<sub>3</sub>) of compound **3ei**:

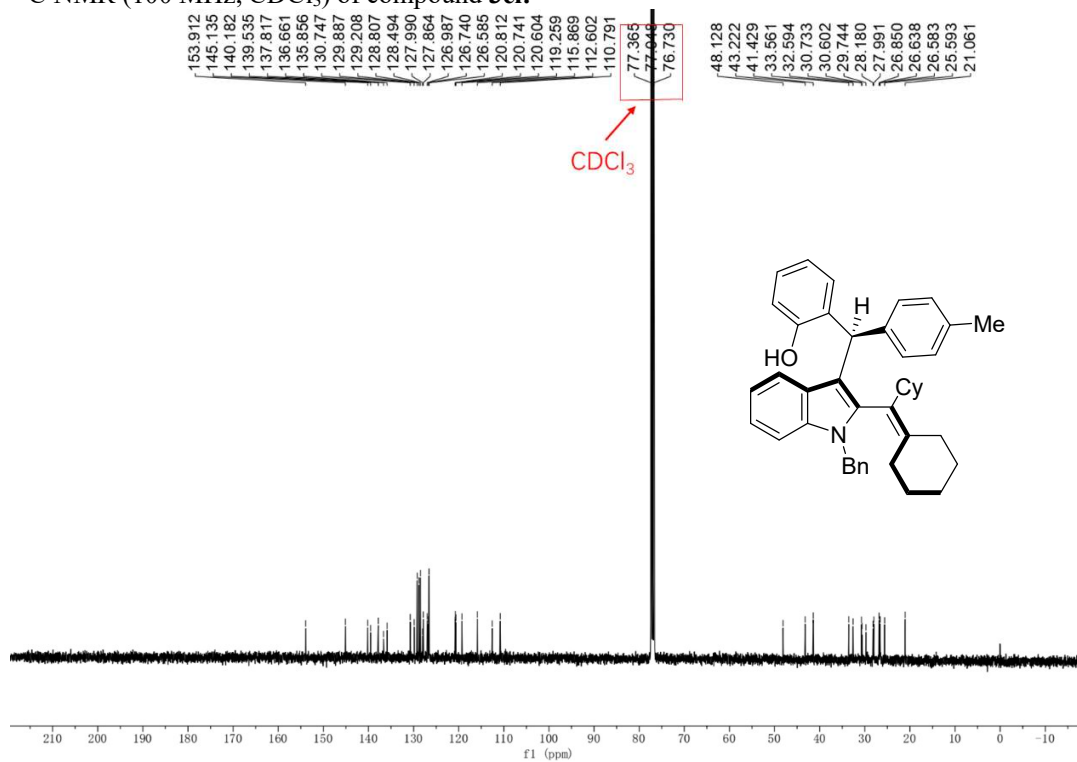

$^1\text{H}$  NMR (400 MHz,  $\text{CDCl}_3$ ) of compound **3fa** (inseparable diastereomers with 85:15 dr):

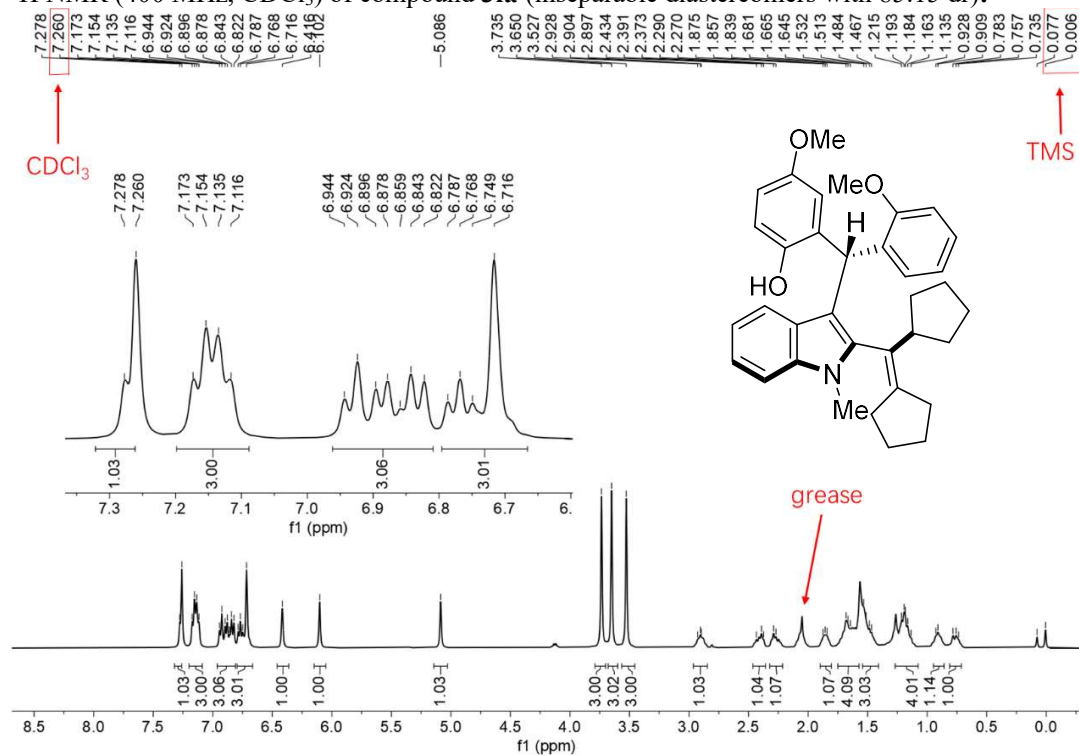

$^{13}\text{C}$  NMR (100 MHz,  $\text{CDCl}_3$ ) of compound **3fa**:

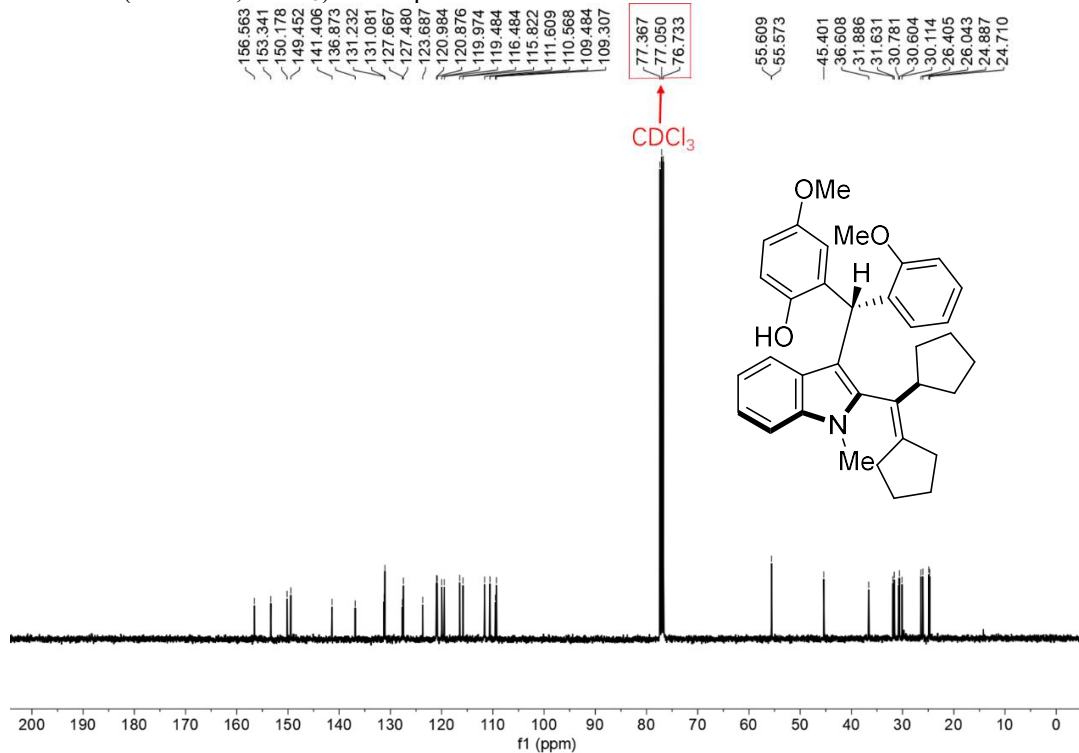

$^1\text{H}$  NMR (400 MHz,  $\text{CDCl}_3$ ) of compound **3ga**:

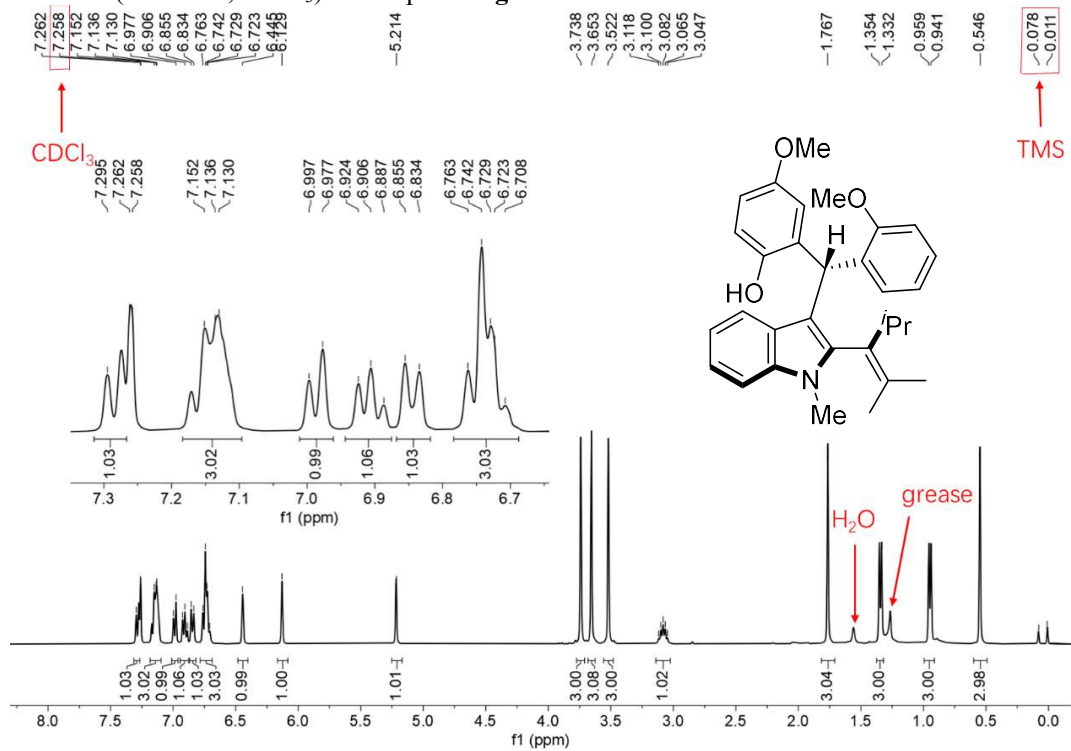

$^{13}\text{C}$  NMR (100 MHz,  $\text{CDCl}_3$ ) of compound **3ga**:

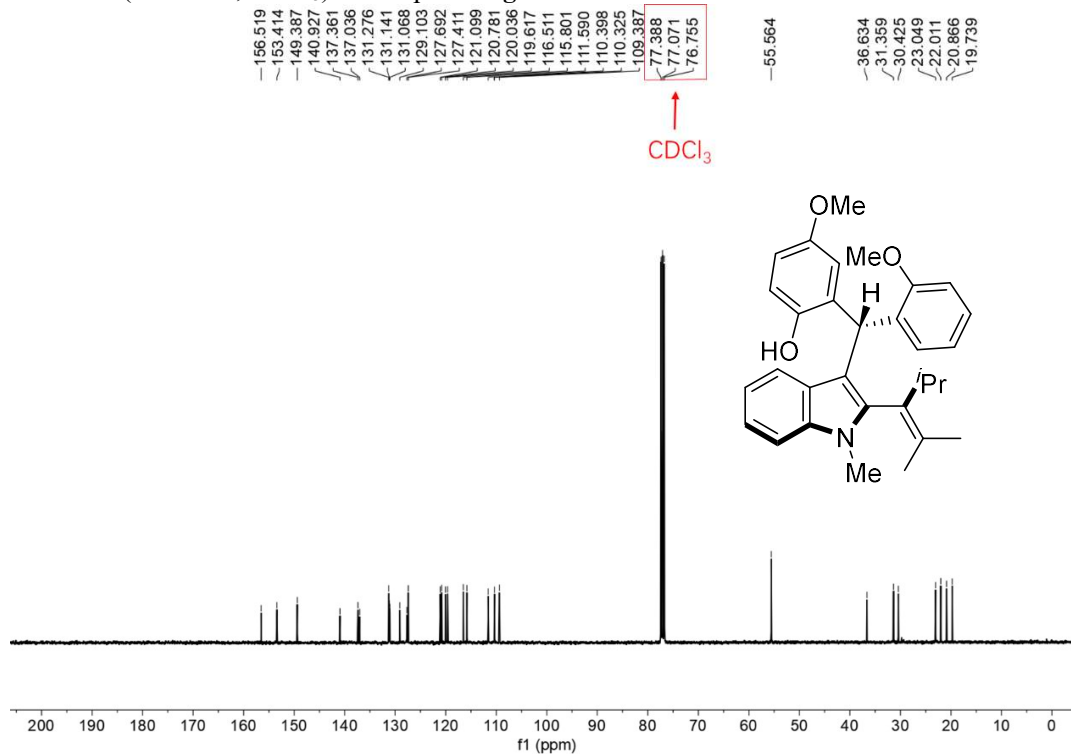

$^1\text{H}$  NMR (400 MHz,  $\text{CDCl}_3$ ) of compound **4aa** (inseparable diastereomers with 92:8 dr):

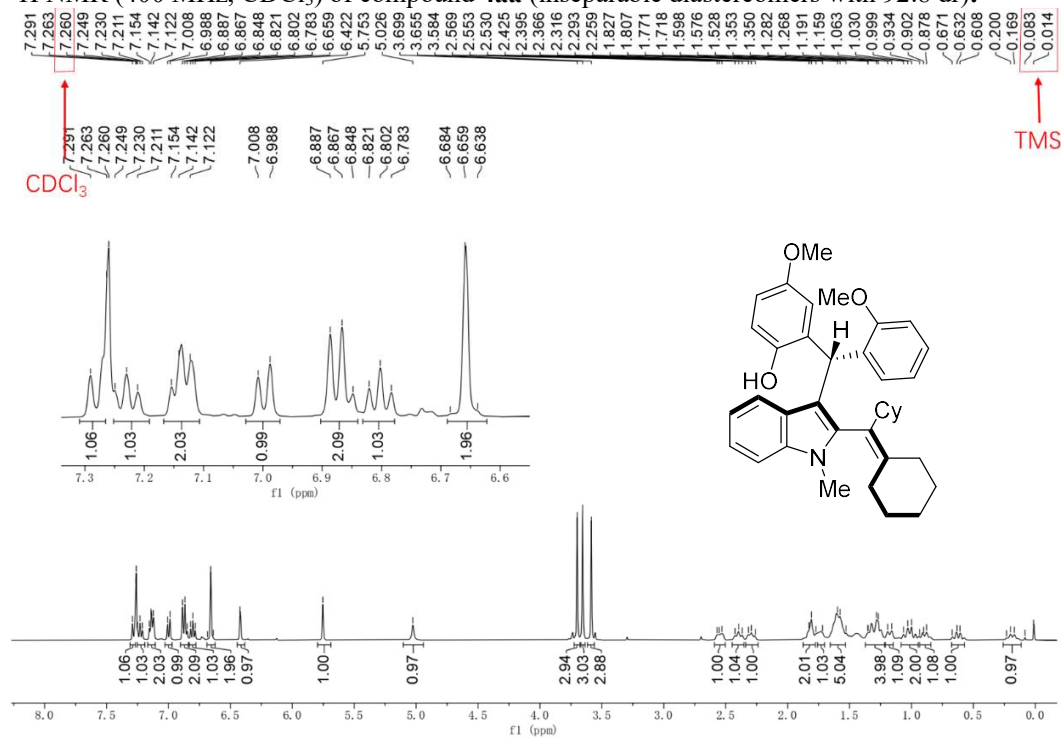

$^{13}\text{C}$  NMR (100 MHz,  $\text{CDCl}_3$ ) of compound **4aa**:

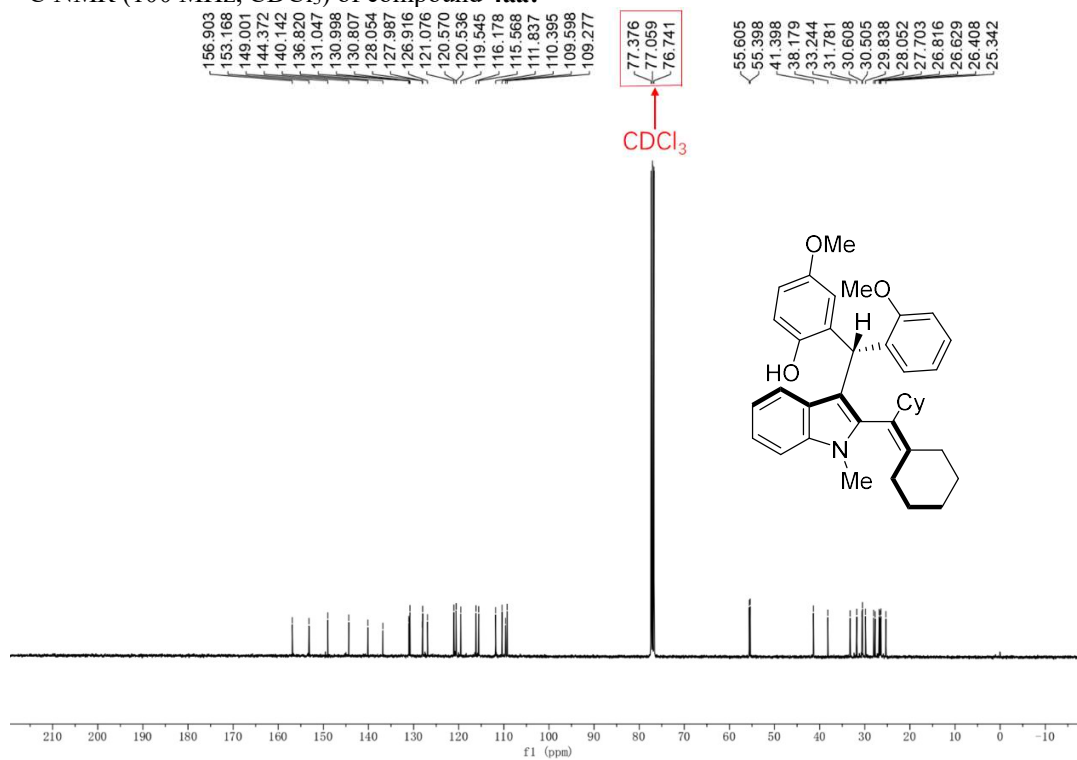

$^1\text{H}$  NMR (400 MHz,  $\text{CDCl}_3$ ) of compound **4ac**:

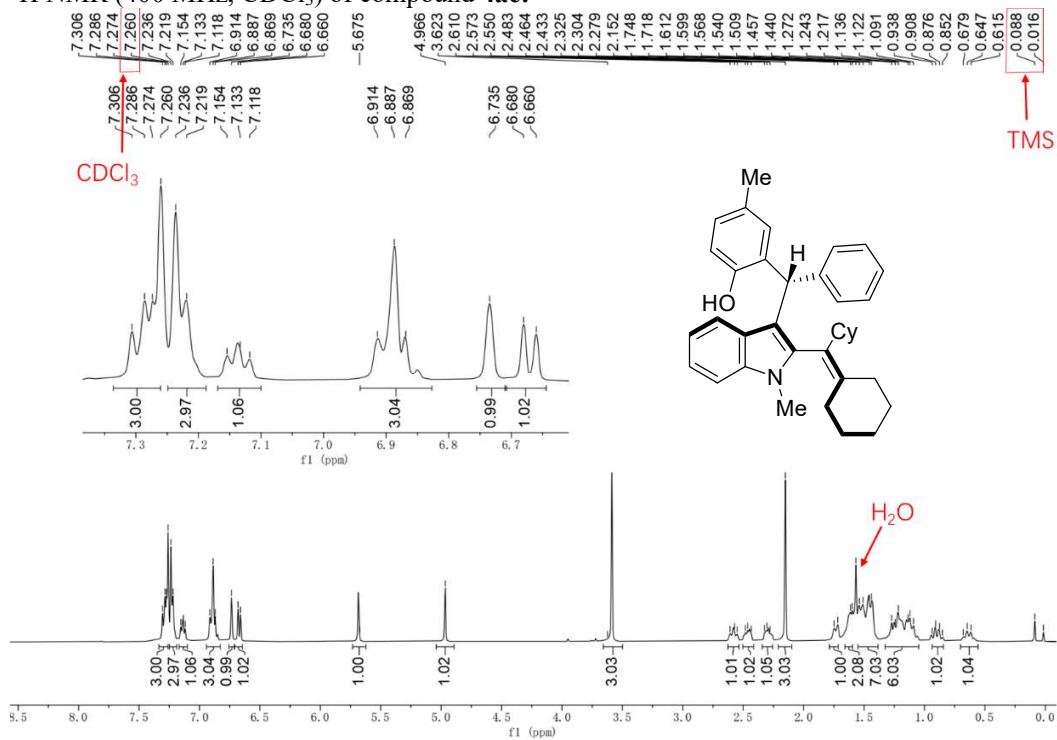

$^{13}\text{C}$  NMR (100 MHz,  $\text{CDCl}_3$ ) of compound **4ac**:

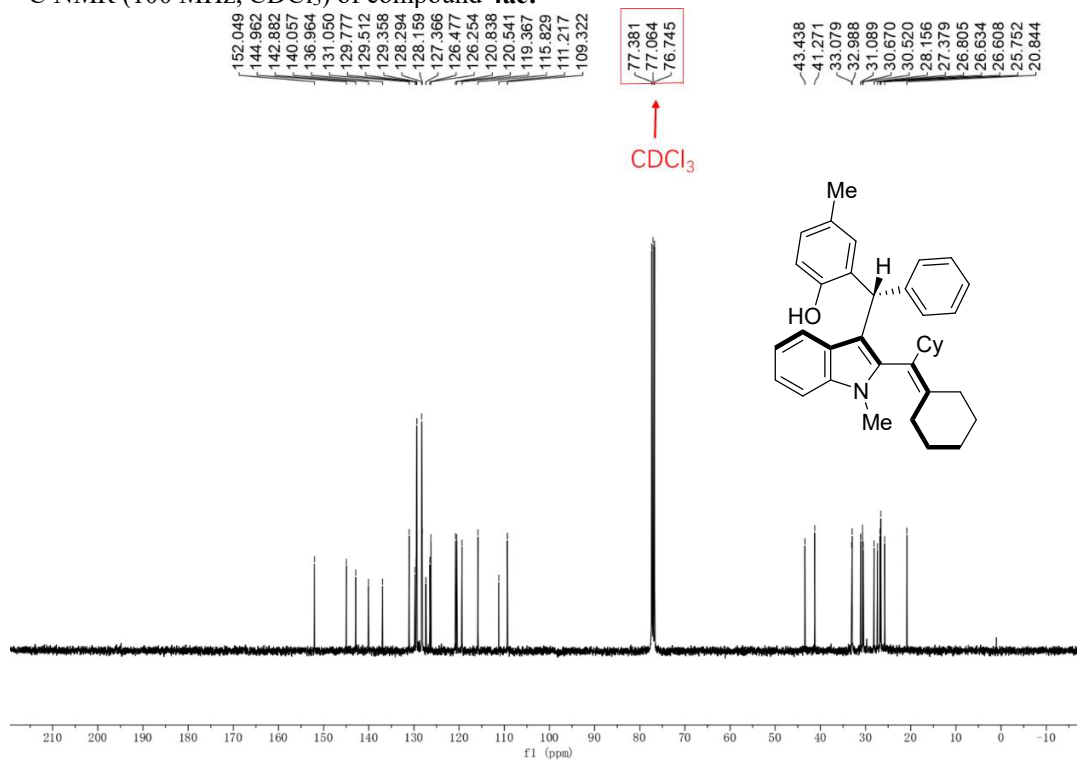



<sup>1</sup>H NMR (400 MHz, CDCl<sub>3</sub>) of compound **4a1**:

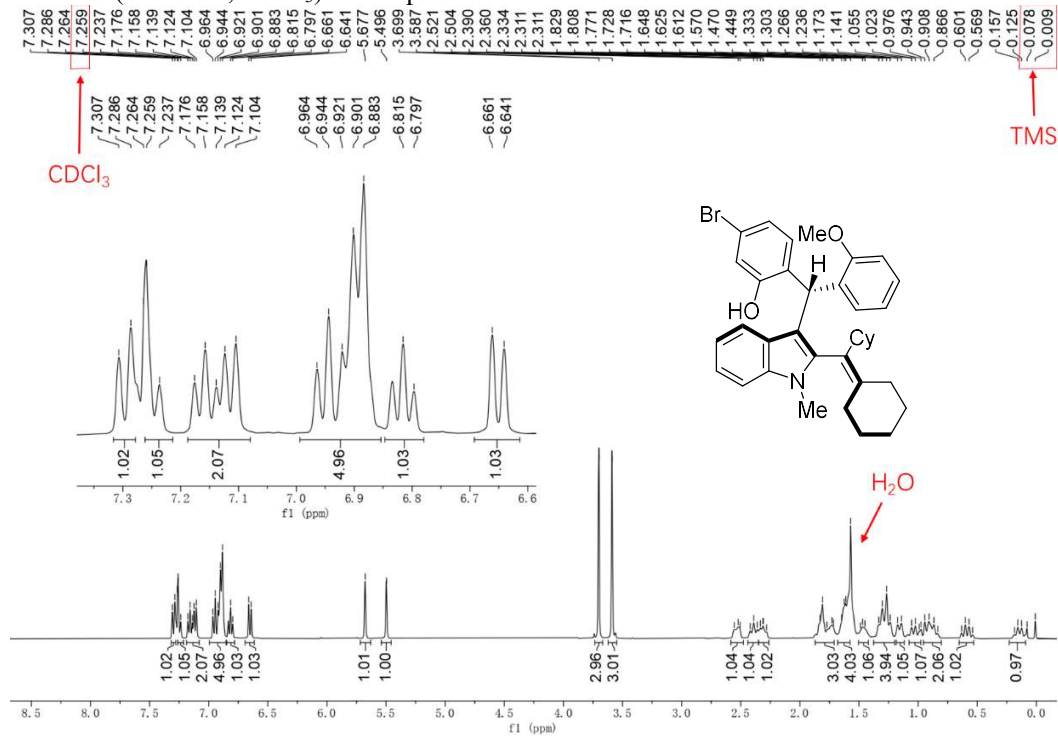

<sup>13</sup>C NMR (100 MHz, CDCl<sub>3</sub>) of compound **4a1**:

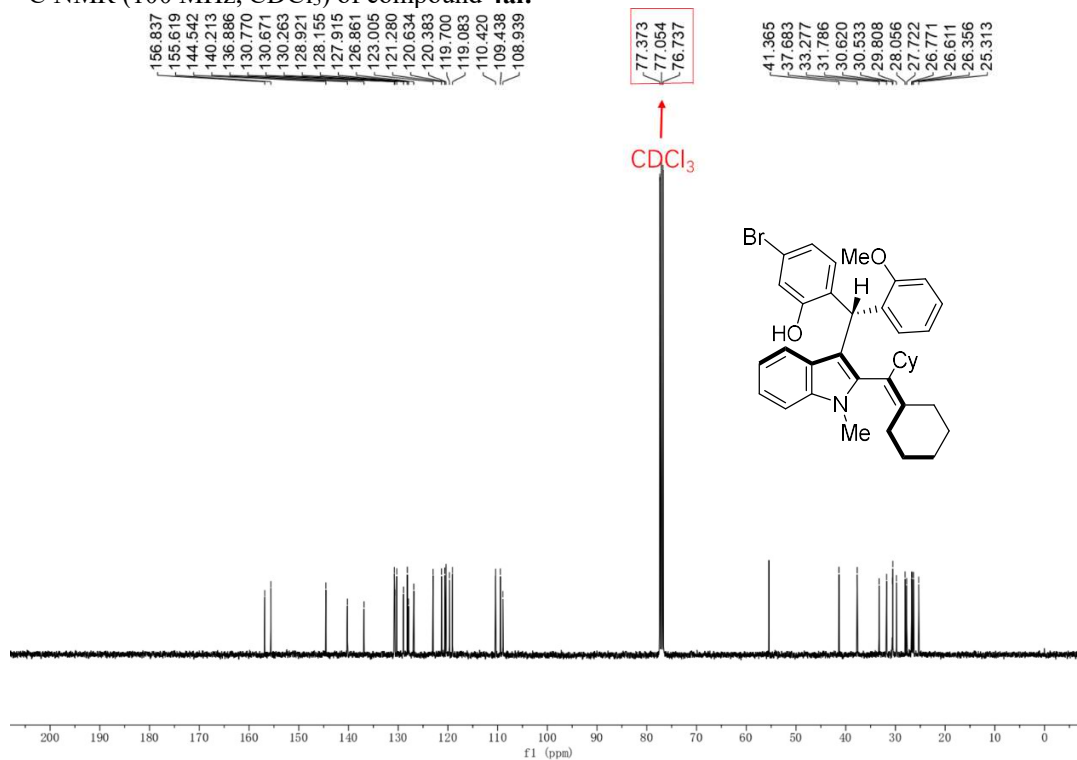

<sup>1</sup>H NMR (400 MHz, CDCl<sub>3</sub>) of compound **4ai**:

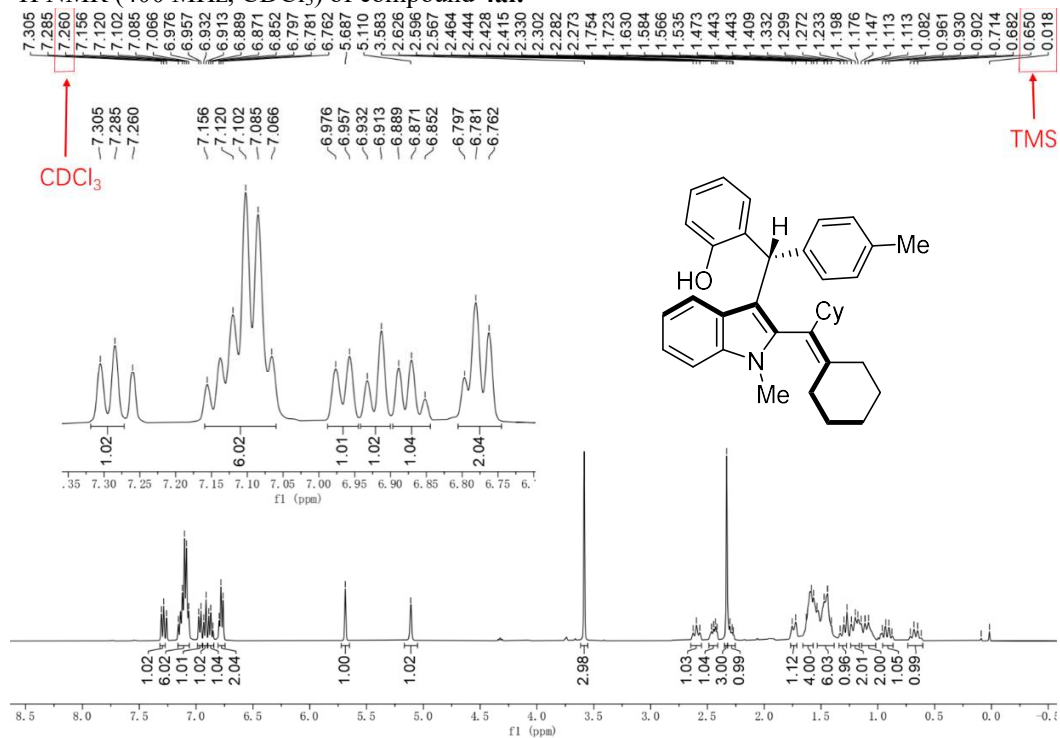

<sup>13</sup>C NMR (100 MHz, CDCl<sub>3</sub>) of compound **4ai**:

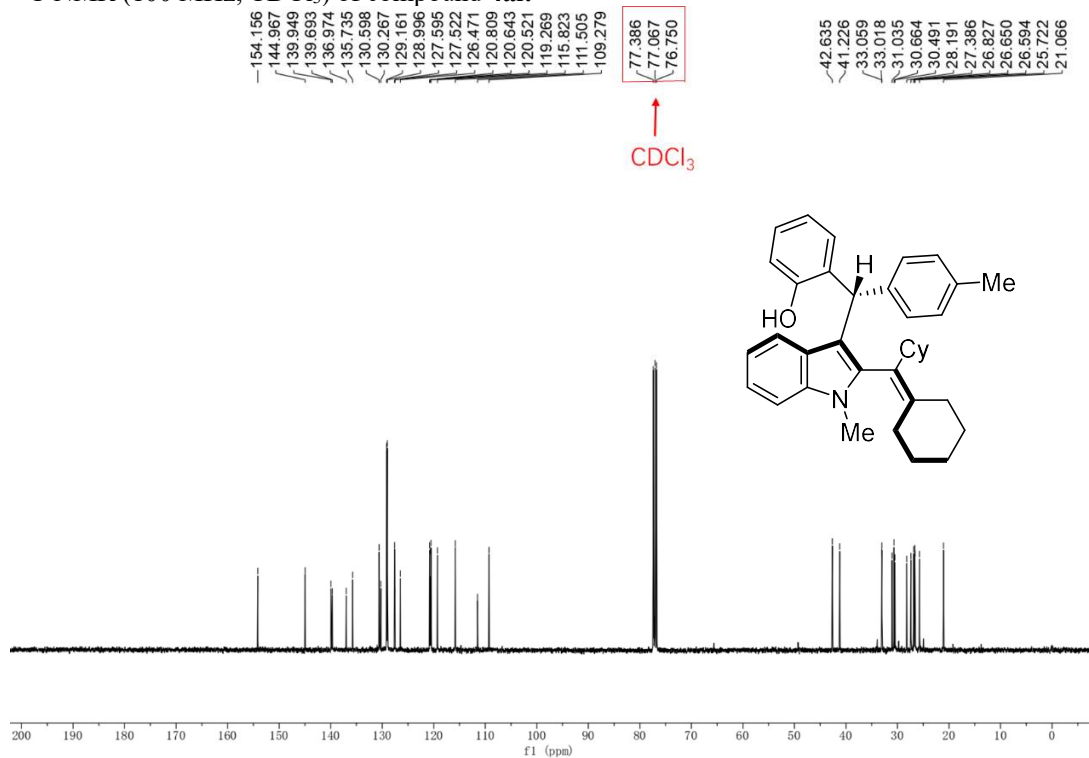

<sup>1</sup>H NMR (400 MHz, CDCl<sub>3</sub>) of compound **4am**:

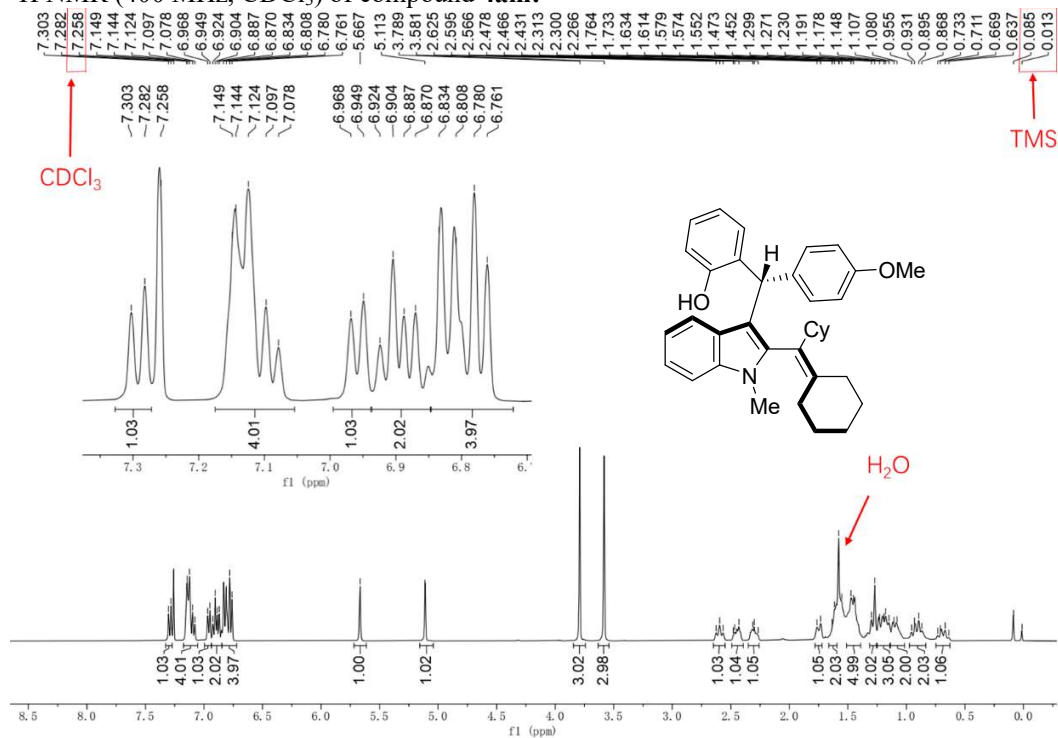

<sup>13</sup>C NMR (100 MHz, CDCl<sub>3</sub>) of compound **4am**:

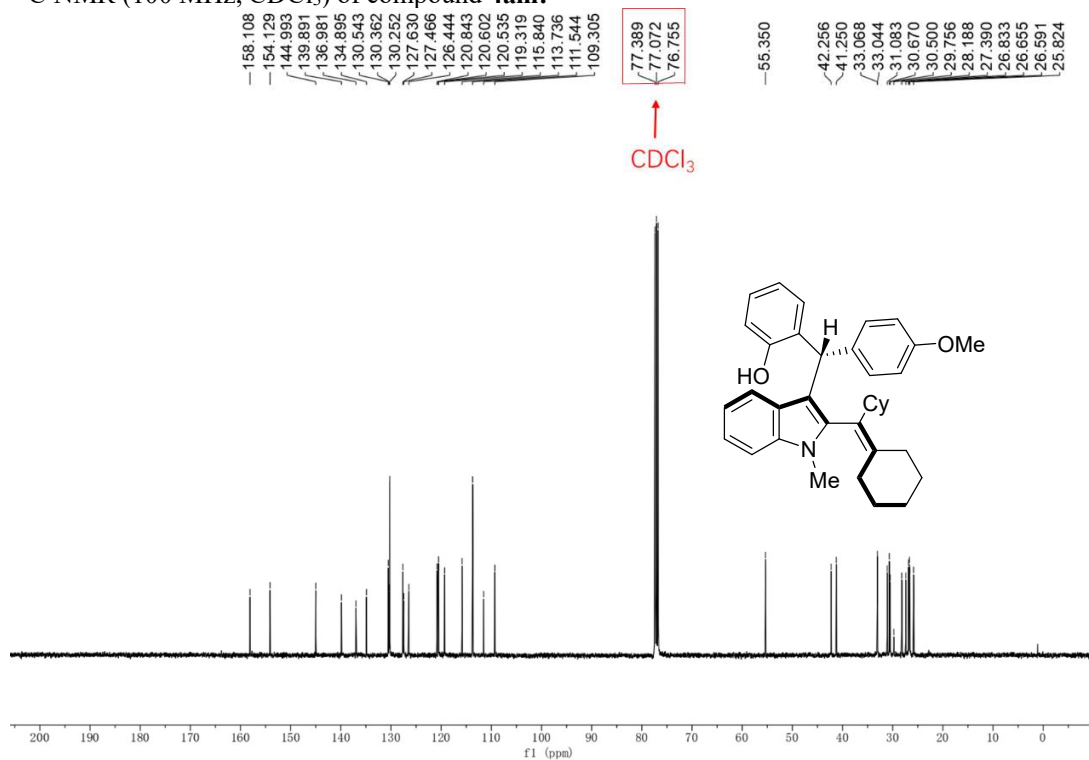

$^1\text{H}$  NMR (400 MHz,  $\text{CDCl}_3$ ) of compound **4aj** (inseparable diastereomers with >95:5 dr):

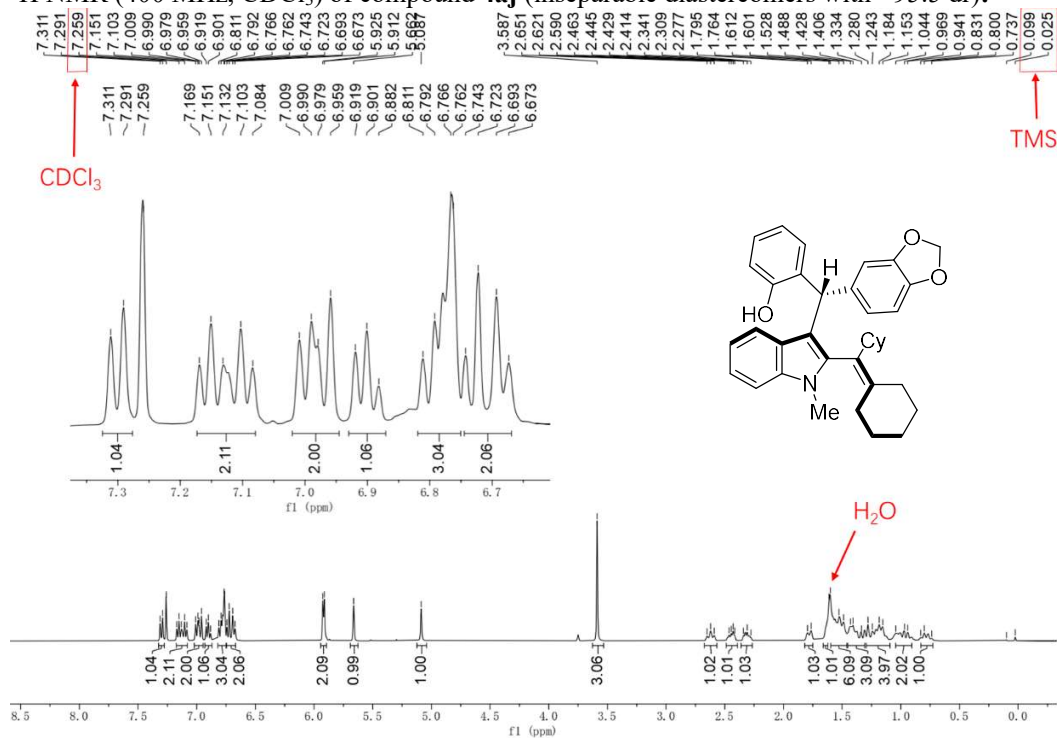

$^{13}\text{C}$  NMR (100 MHz,  $\text{CDCl}_3$ ) of compound **4aj**:

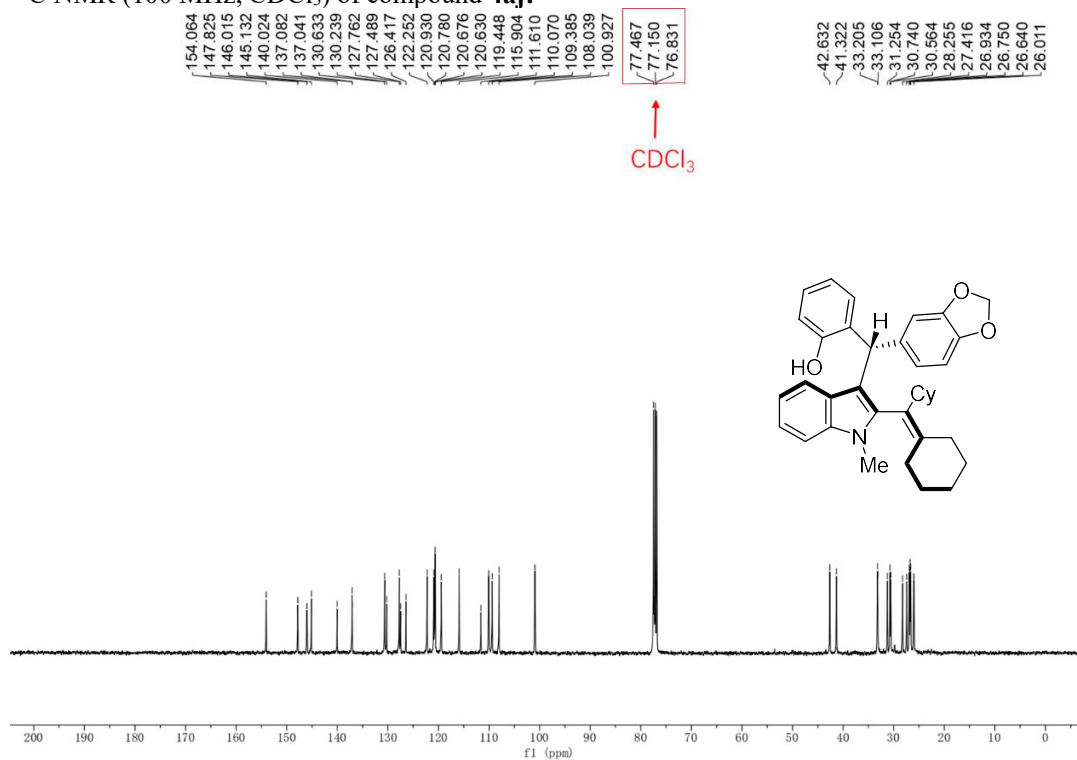

$^1\text{H}$  NMR (400 MHz,  $\text{CDCl}_3$ ) of compound **4ak**:

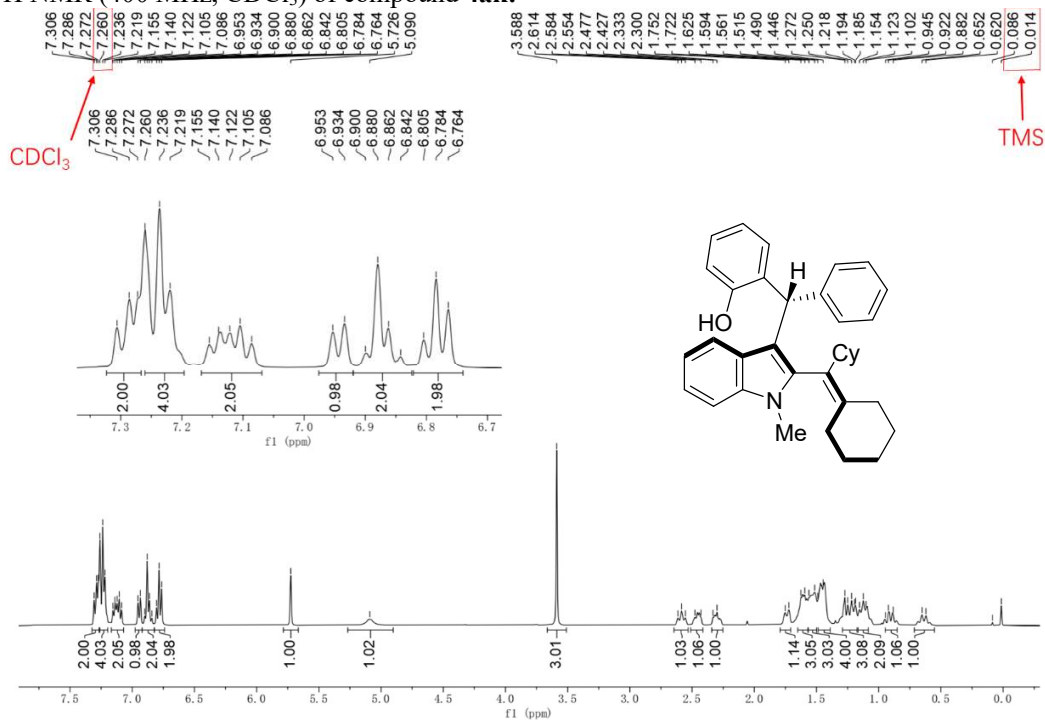

$^{13}\text{C}$  NMR (100 MHz,  $\text{CDCl}_3$ ) of compound **4ak**:

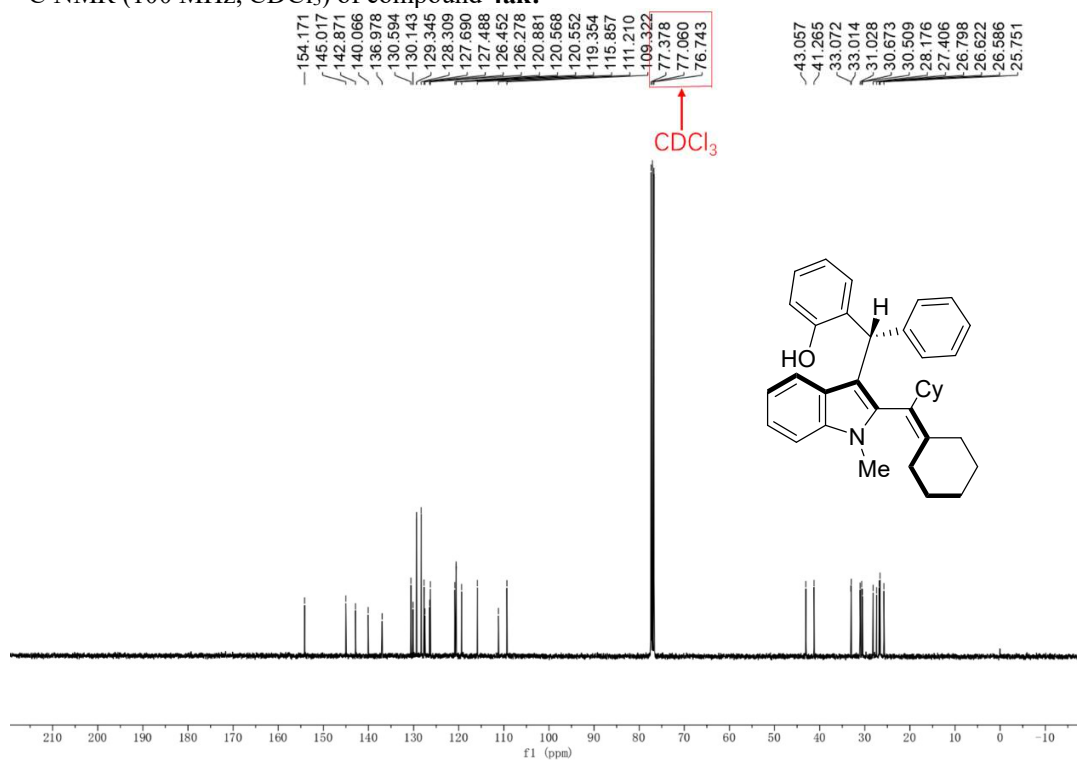

$^1\text{H}$  NMR (400 MHz,  $\text{CDCl}_3$ ) of compound **4af** (inseparable diastereomers with 86:14 dr):

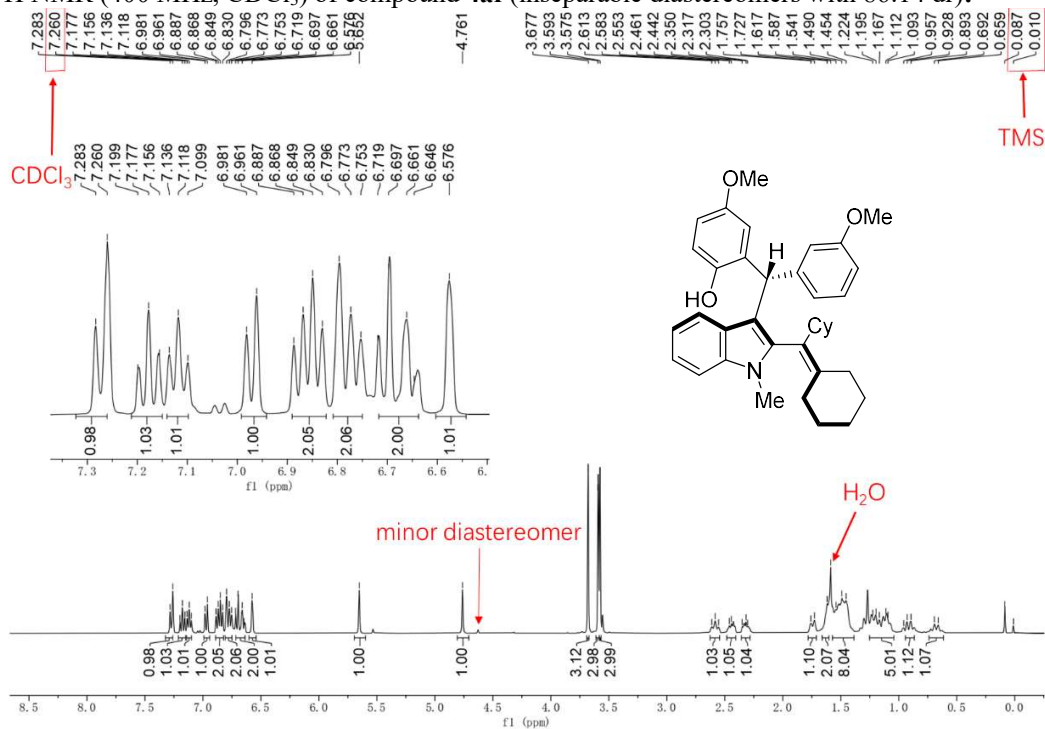

$^{13}\text{C}$  NMR (100 MHz,  $\text{CDCl}_3$ ) of compound **4af**:

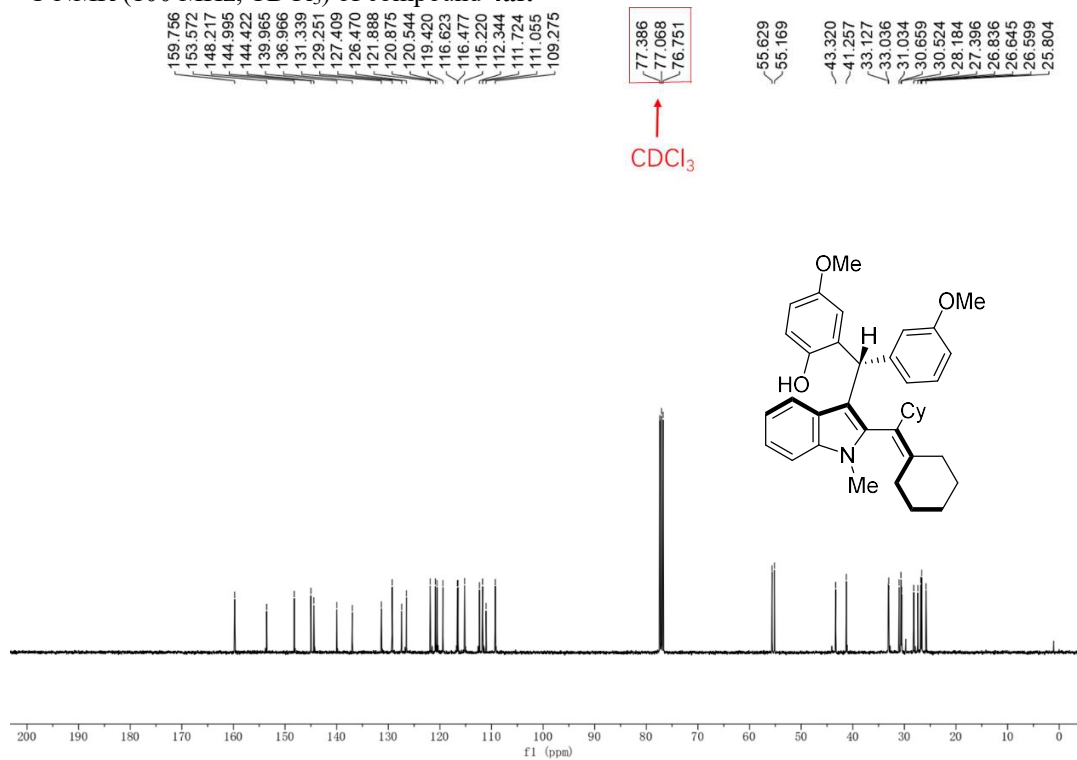

$^1\text{H}$  NMR (400 MHz,  $\text{CDCl}_3$ ) of compound **4ah**:

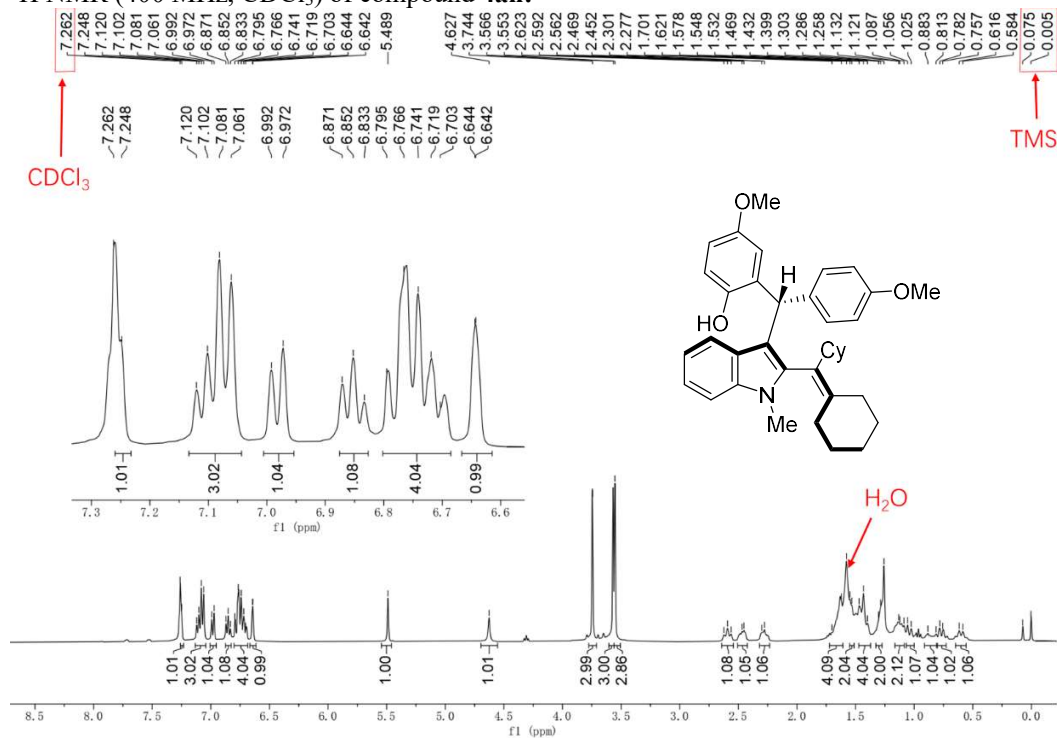

$^{13}\text{C}$  NMR (100 MHz,  $\text{CDCl}_3$ ) of compound **4ah**:

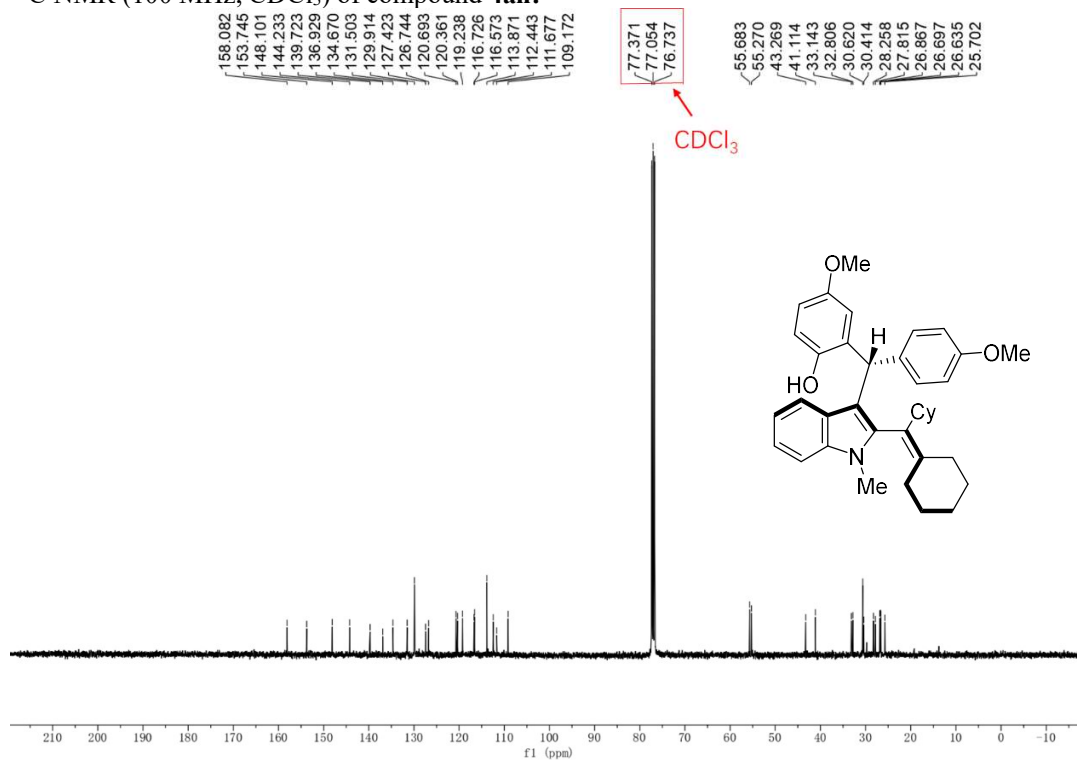

$^1\text{H}$  NMR (400 MHz,  $\text{CDCl}_3$ ) of compound **4ba** (inseparable diastereomers with  $>95:5$  dr):

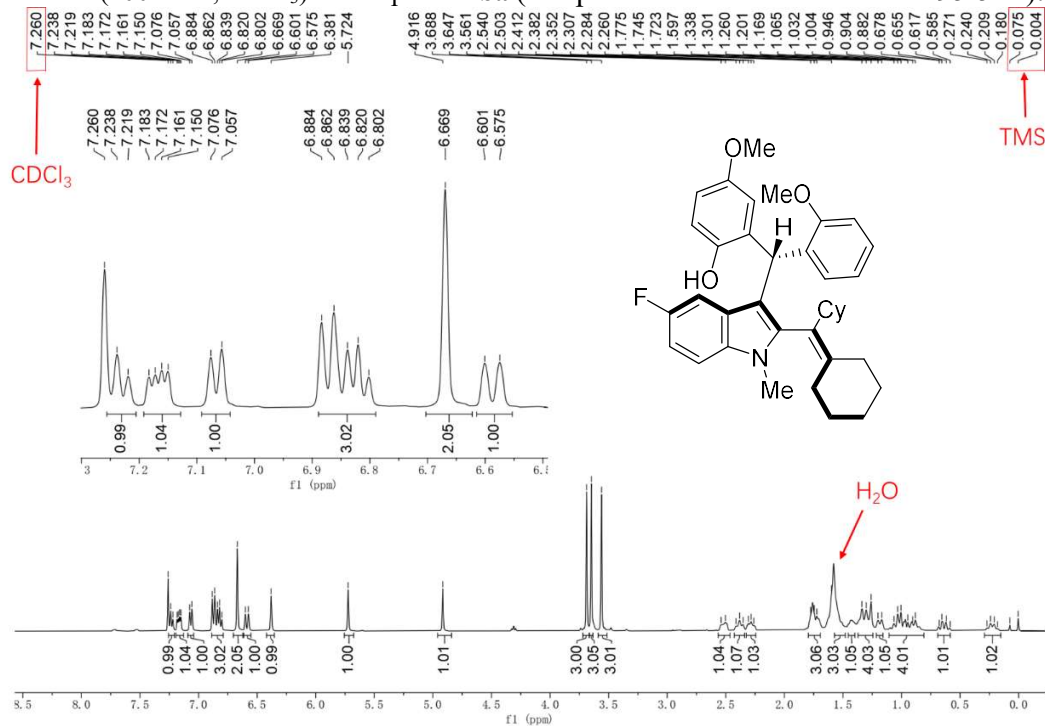

$^{13}\text{C}$  NMR (100 MHz,  $\text{CDCl}_3$ ) of compound **4ba**:

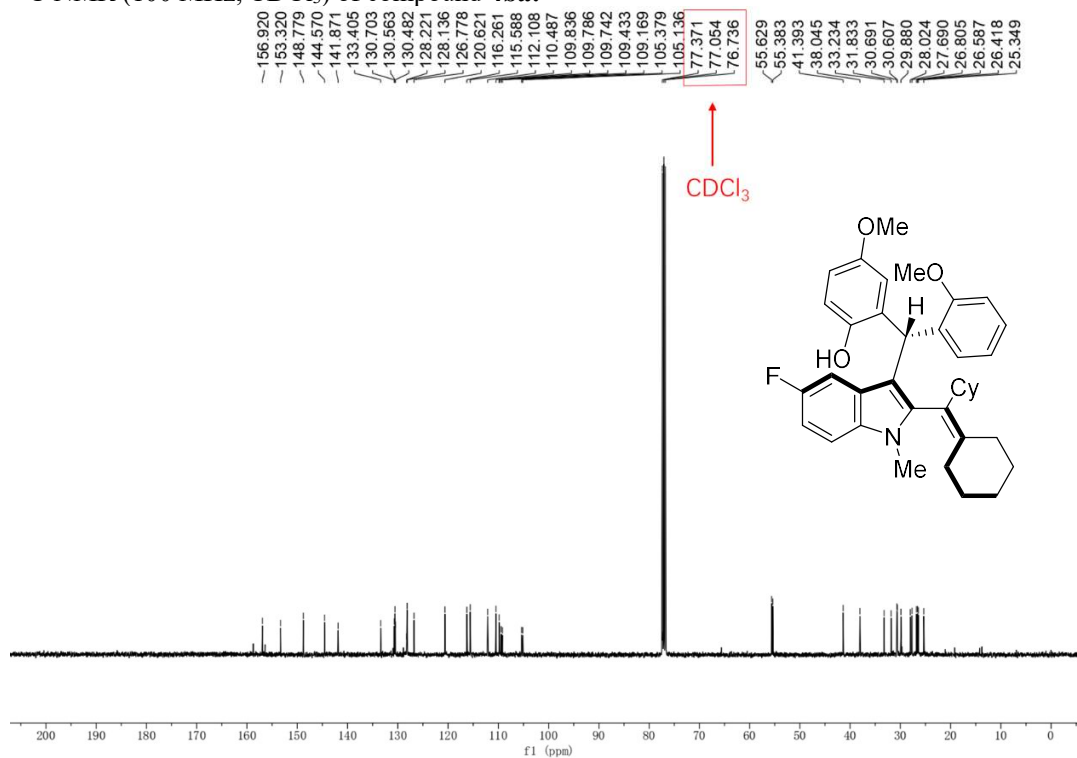



$^{19}\text{F}$  NMR (376 MHz,  $\text{CDCl}_3$ ) of compound **4ba**:

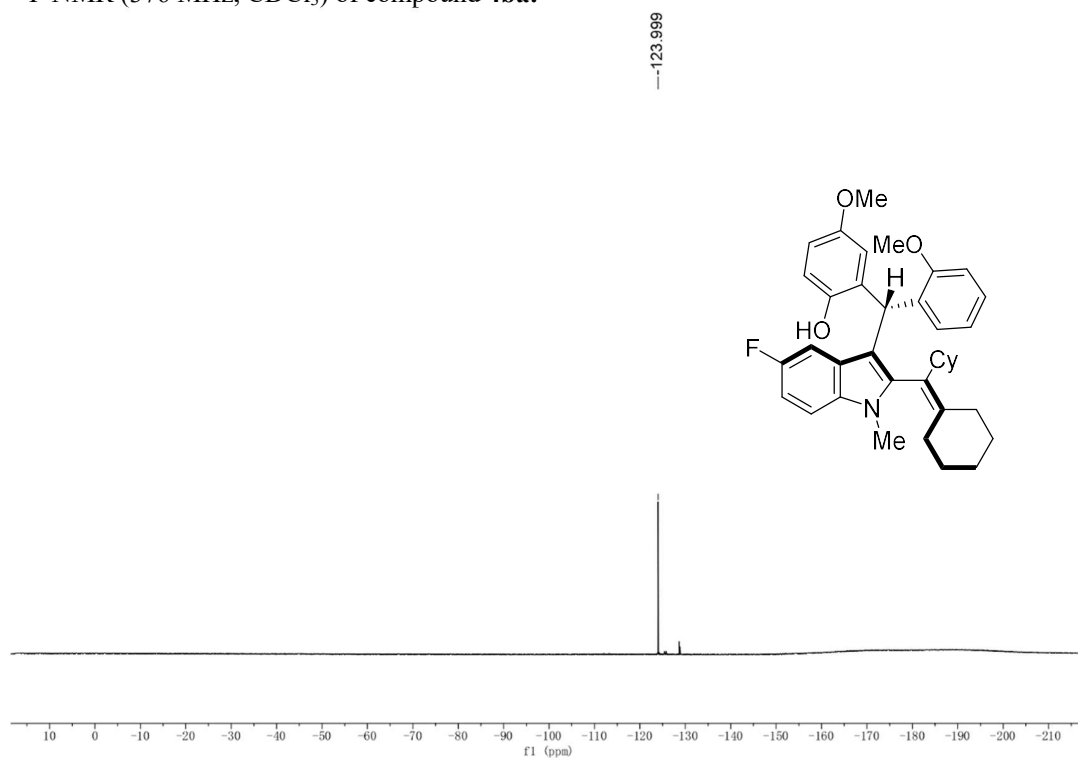

<sup>1</sup>H NMR (400 MHz, CDCl<sub>3</sub>) of compound **4ca**:

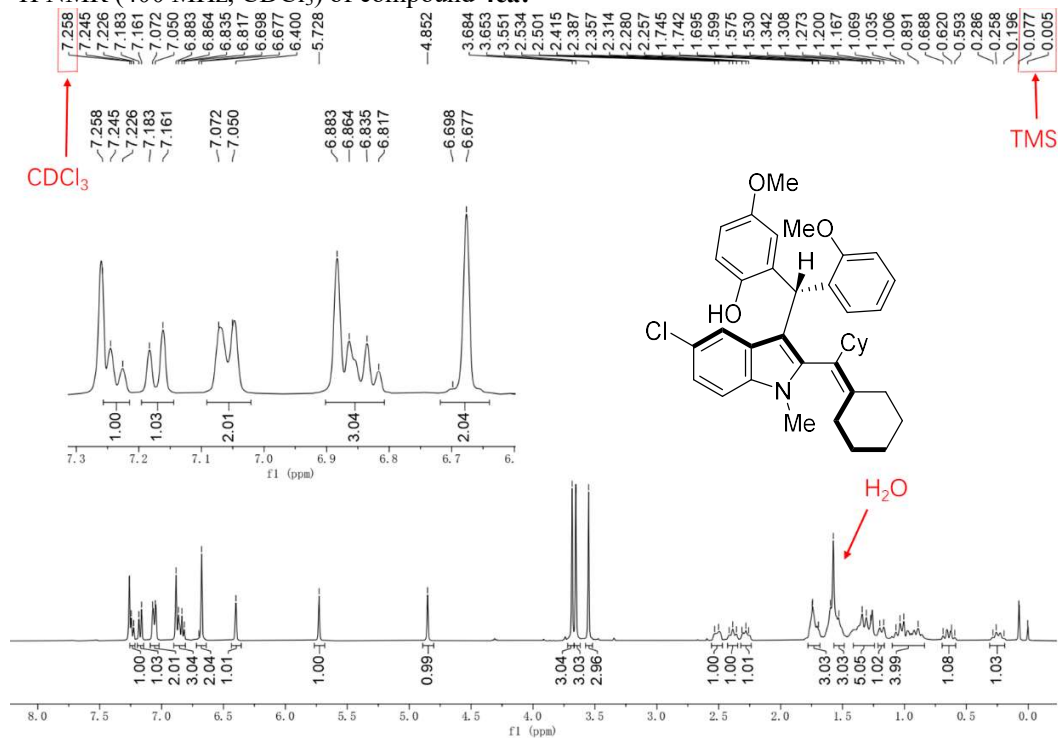

<sup>13</sup>C NMR (100 MHz, CDCl<sub>3</sub>) of compound **4ca**:

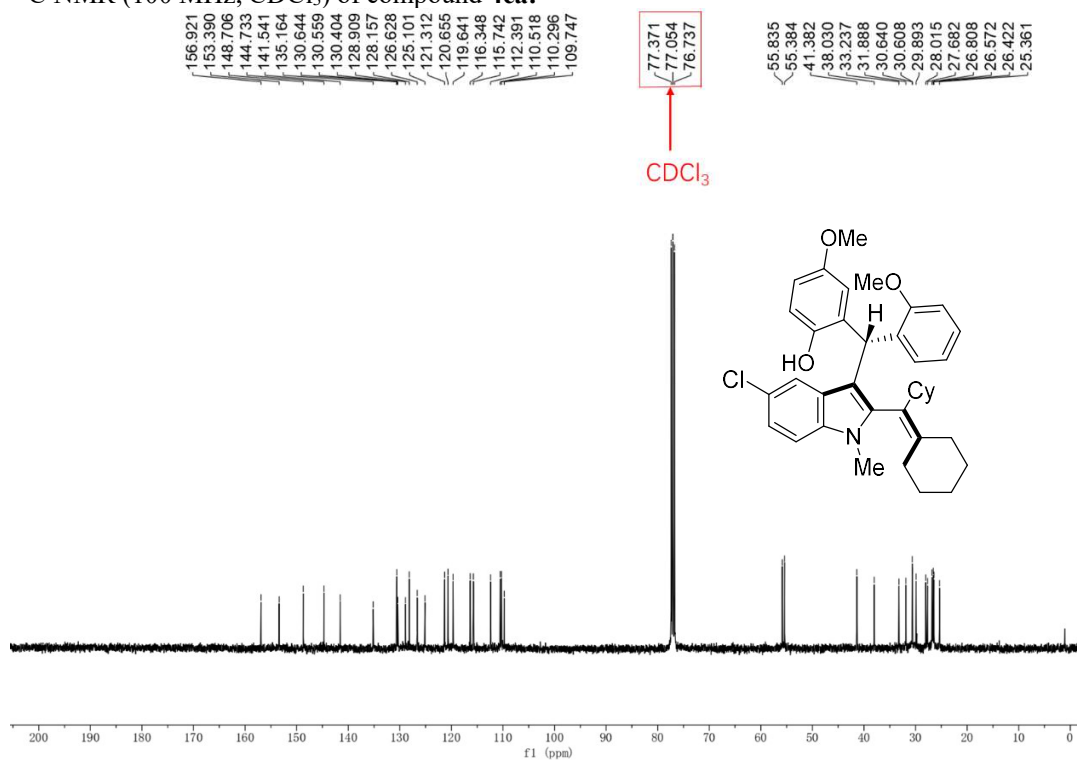

<sup>1</sup>H NMR (400 MHz, CDCl<sub>3</sub>) of compound **4ci**:

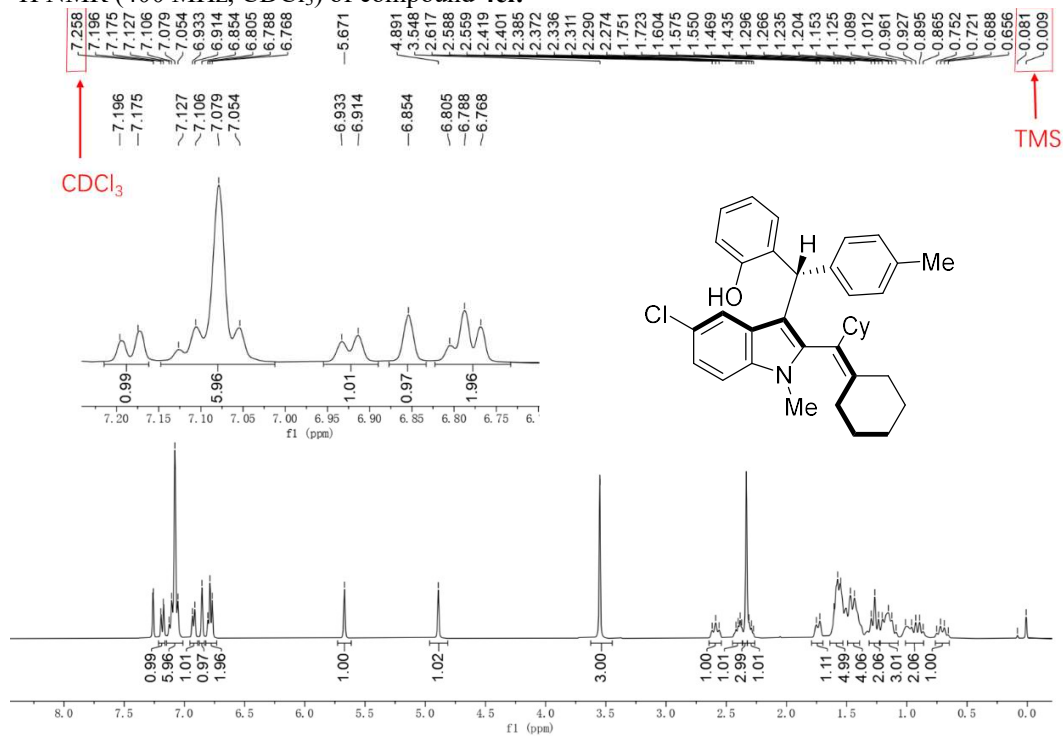

<sup>13</sup>C NMR (100 MHz, CDCl<sub>3</sub>) of compound **4ci**:

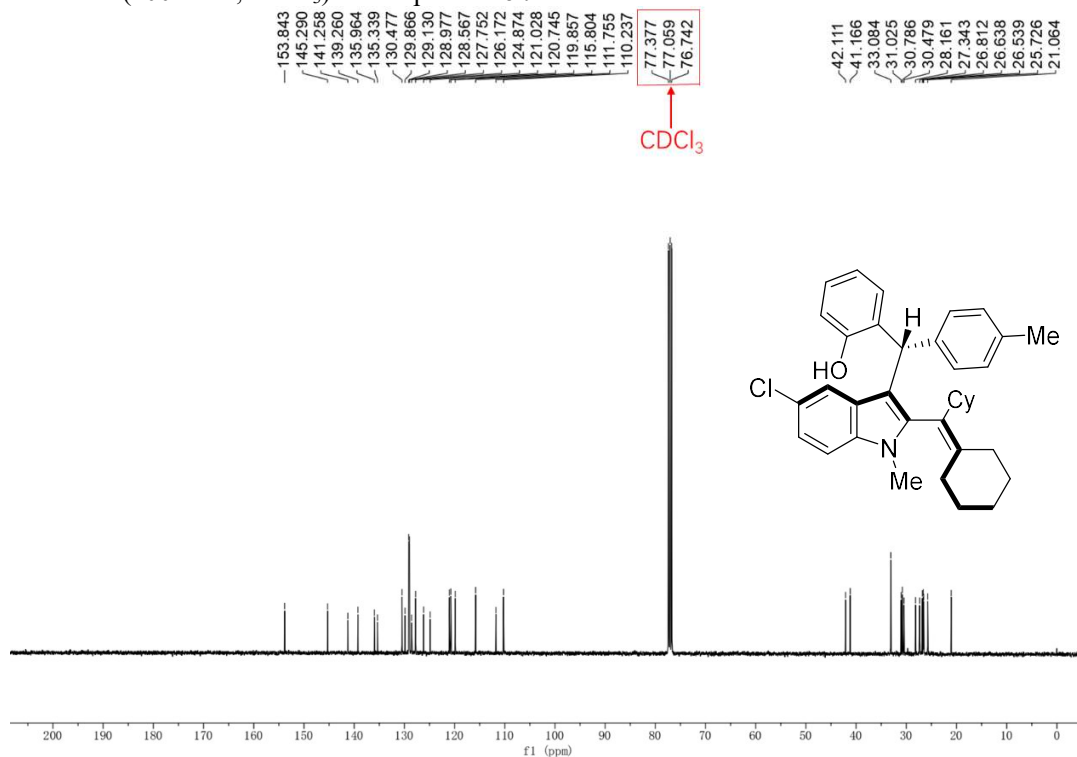

<sup>1</sup>H NMR (400 MHz, CDCl<sub>3</sub>) of compound **4da**:

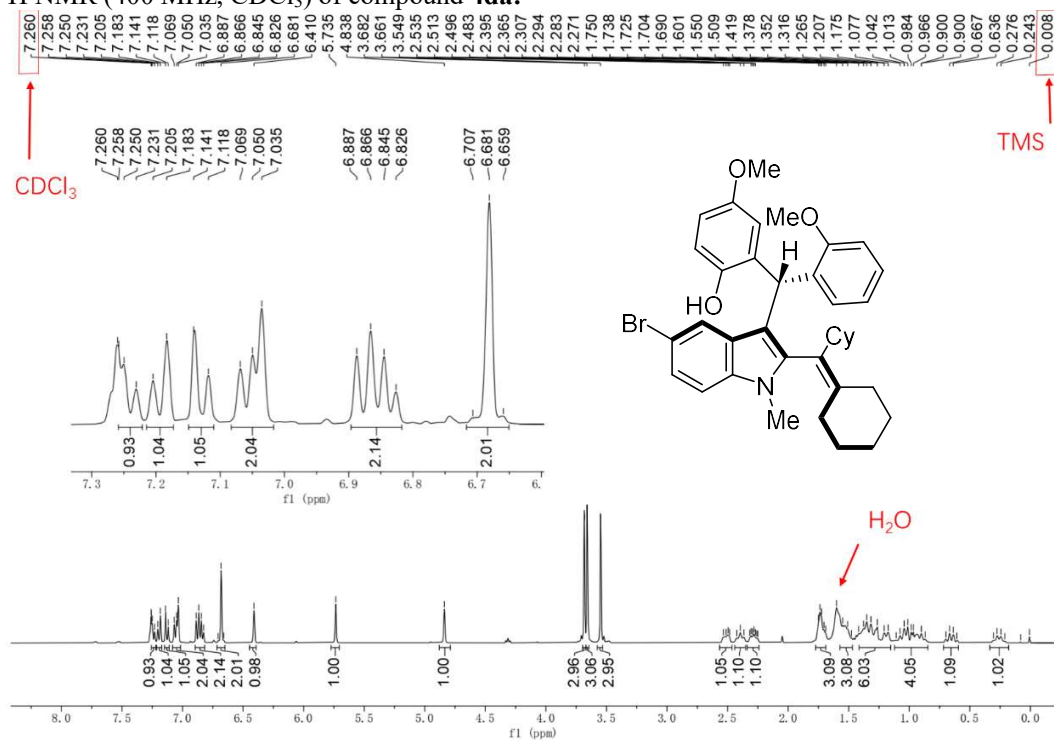

<sup>13</sup>C NMR (100 MHz, CDCl<sub>3</sub>) of compound **4da**:

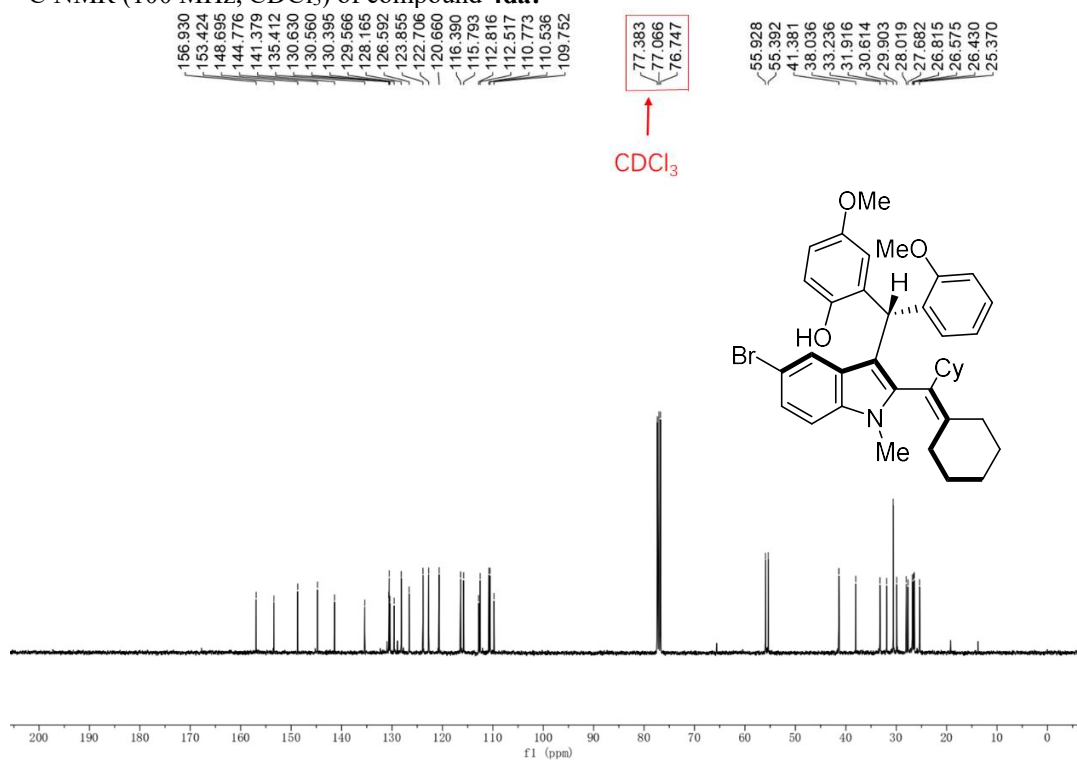

<sup>1</sup>H NMR (400 MHz, CDCl<sub>3</sub>) of compound **4di**:

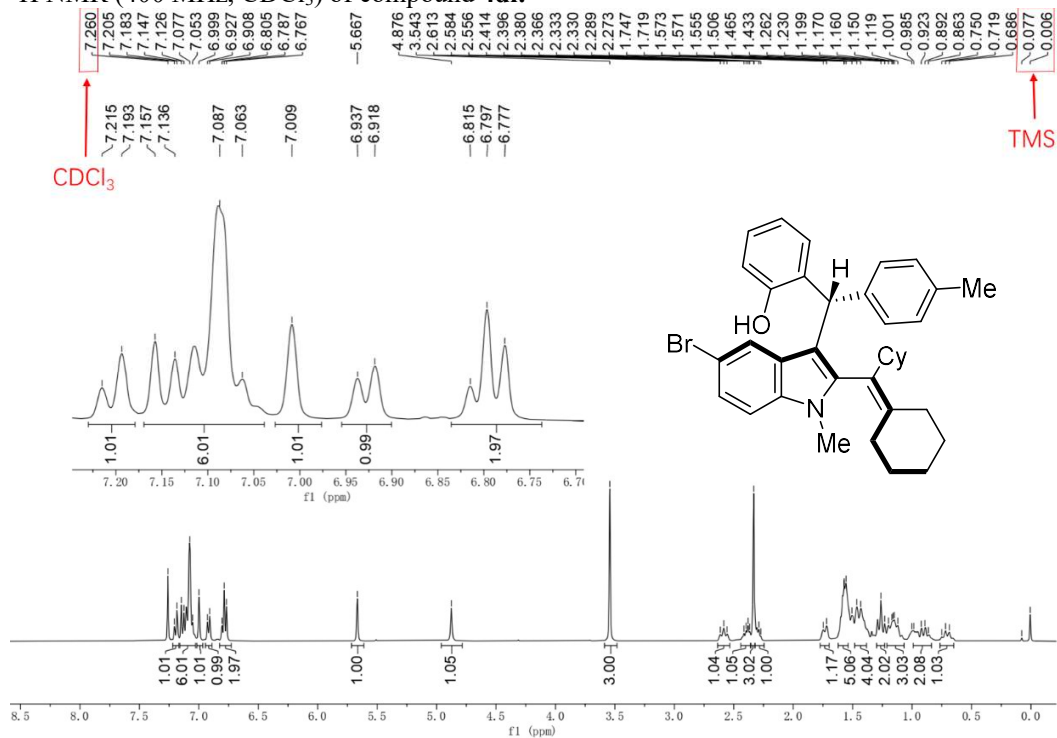

<sup>13</sup>C NMR (100 MHz, CDCl<sub>3</sub>) of compound **4di**:

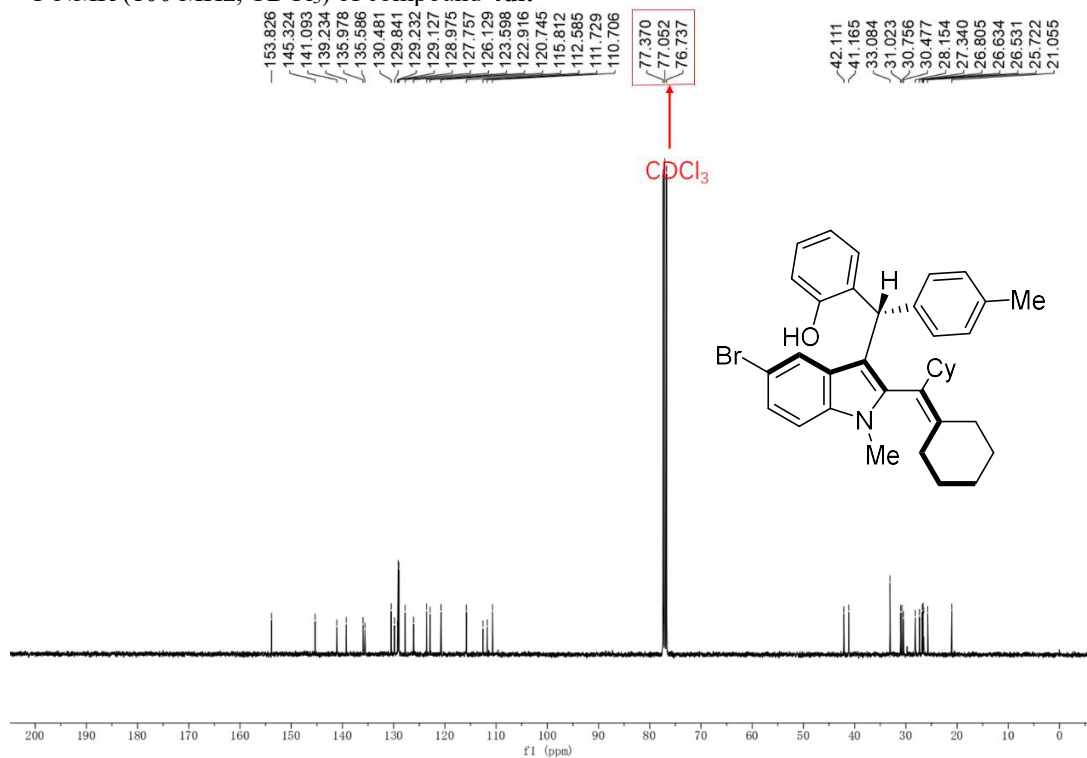

<sup>1</sup>H NMR (400 MHz, CDCl<sub>3</sub>) of compound **4ha**:

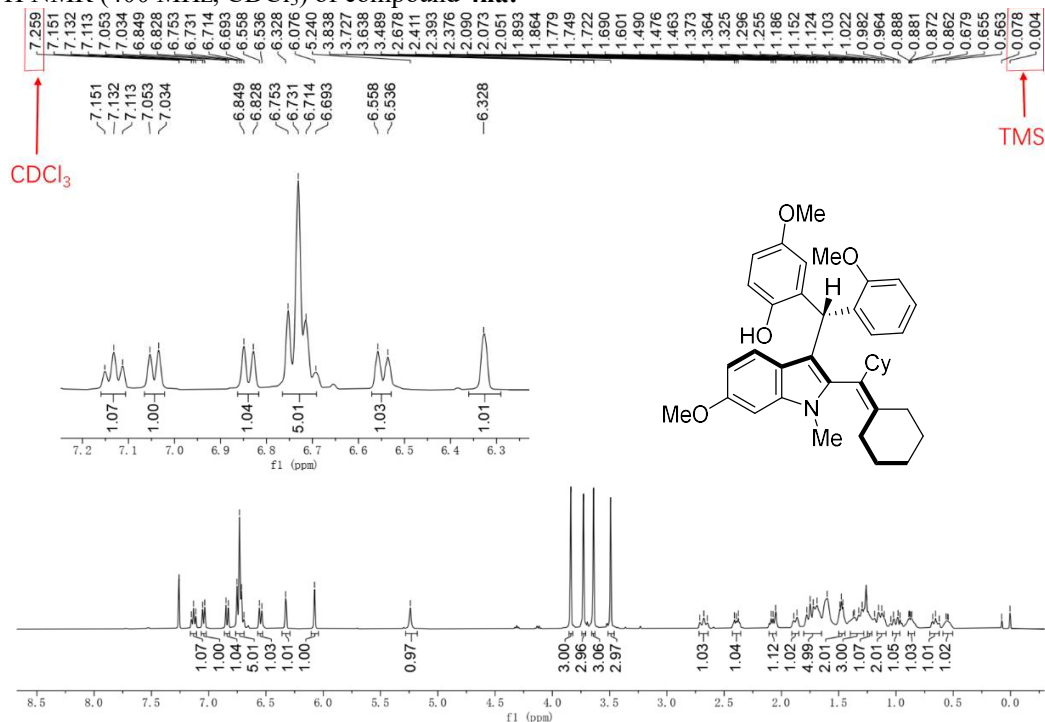

<sup>13</sup>C NMR (100 MHz, CDCl<sub>3</sub>) of compound **4ha**:

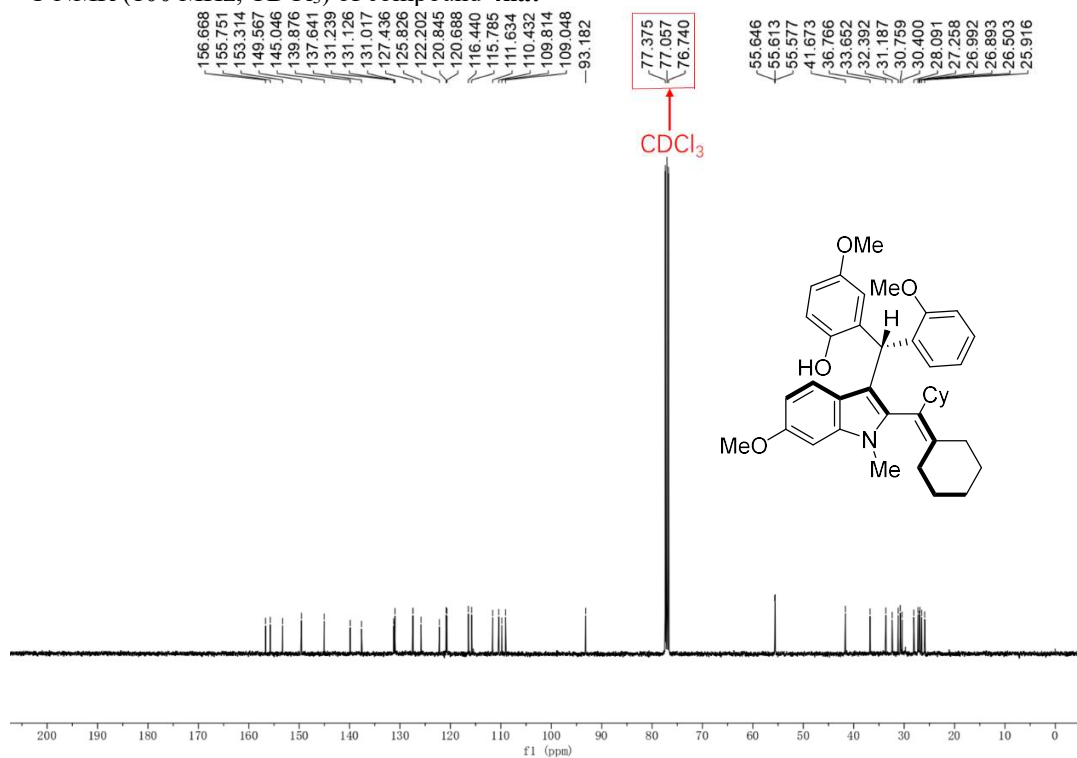

$^1\text{H}$  NMR (400 MHz,  $\text{CDCl}_3$ ) of compound **4ei**:

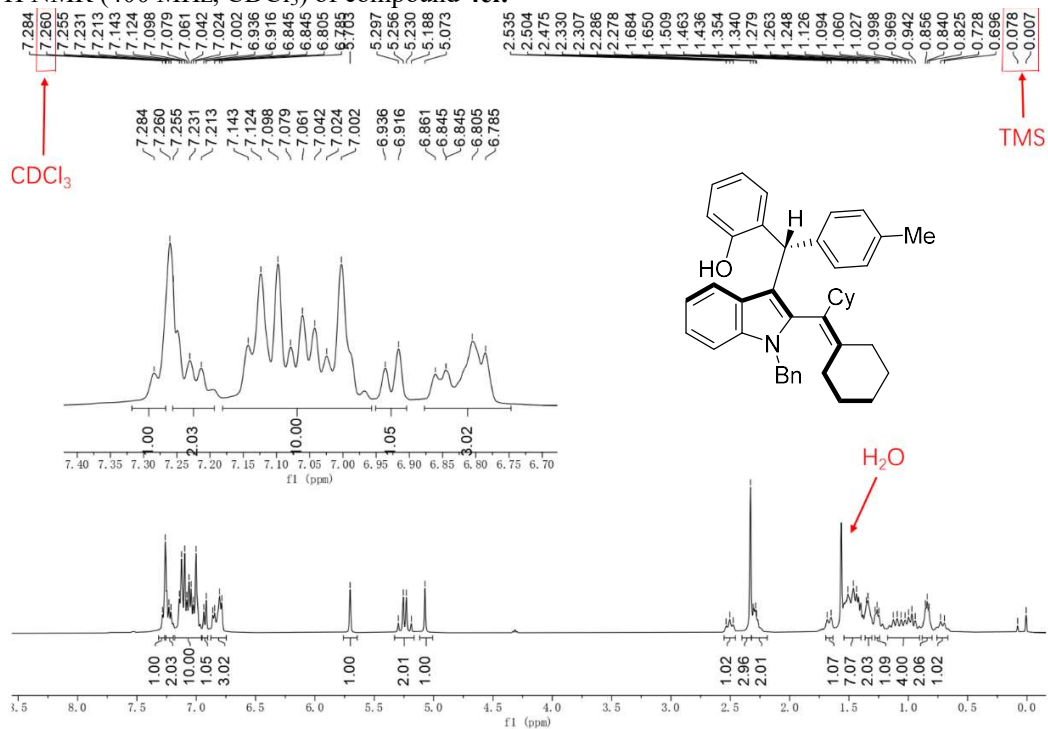

$^{13}\text{C}$  NMR (100 MHz,  $\text{CDCl}_3$ ) of compound **4ei**:

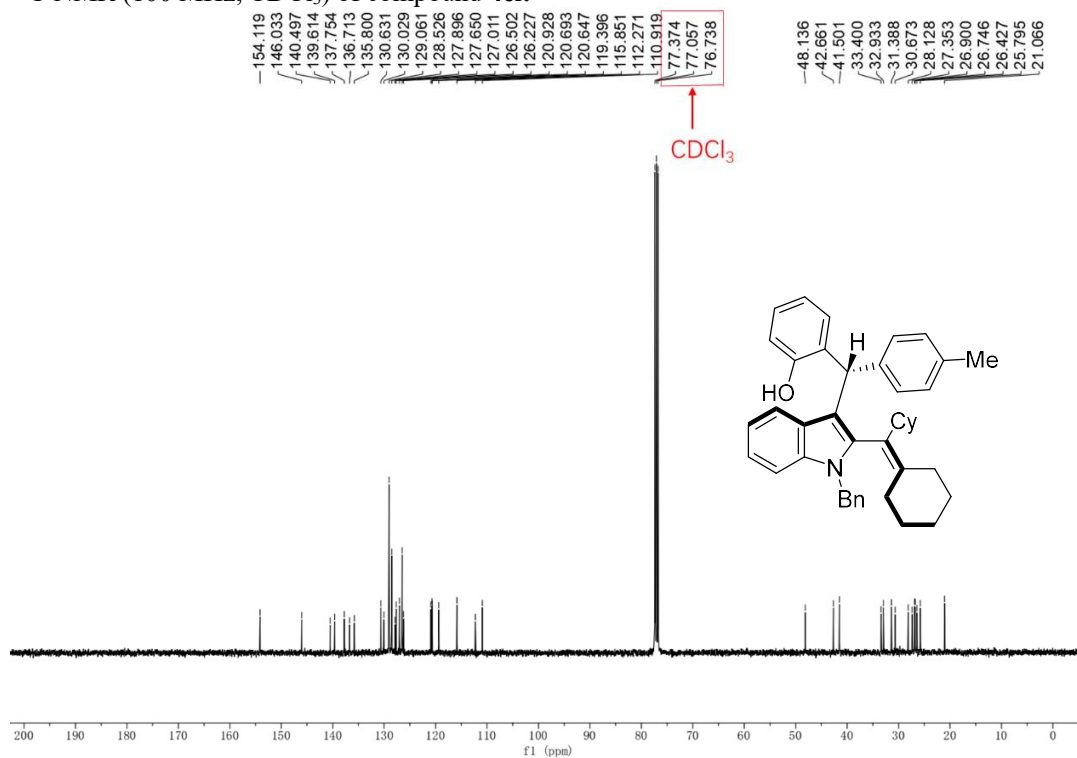

$^1\text{H}$  NMR (400 MHz,  $\text{CDCl}_3$ ) of compound **4fa** (inseparable diastereomers with 75:25 dr):

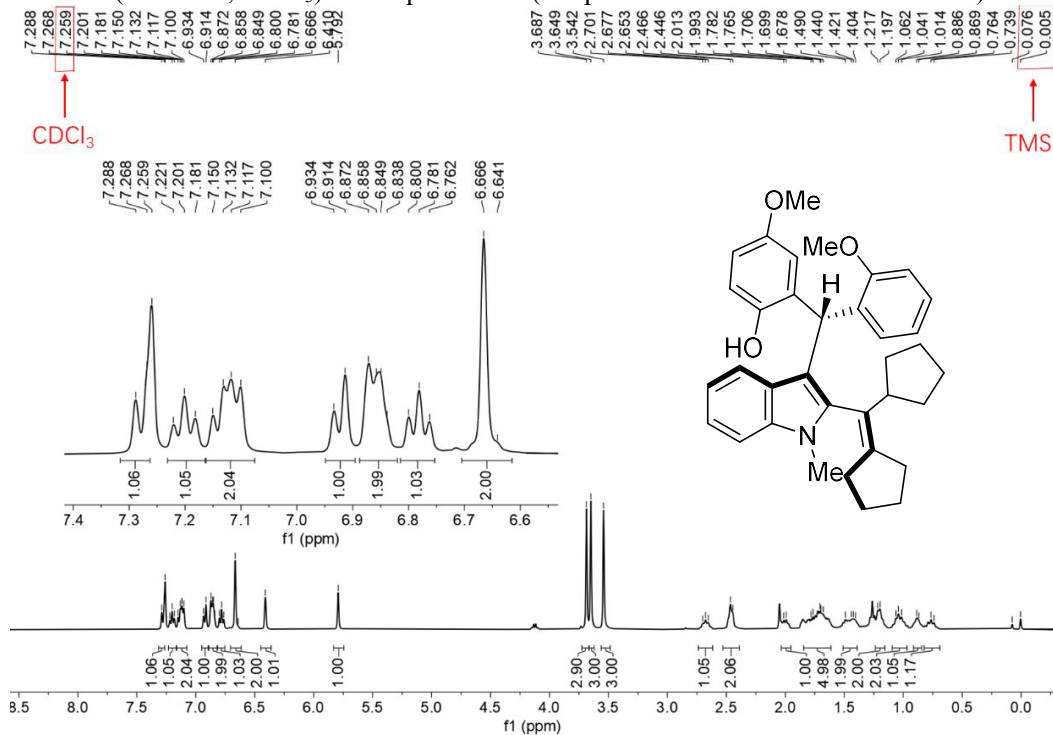

$^{13}\text{C}$  NMR (100 MHz,  $\text{CDCl}_3$ ) of compound **4fa**:

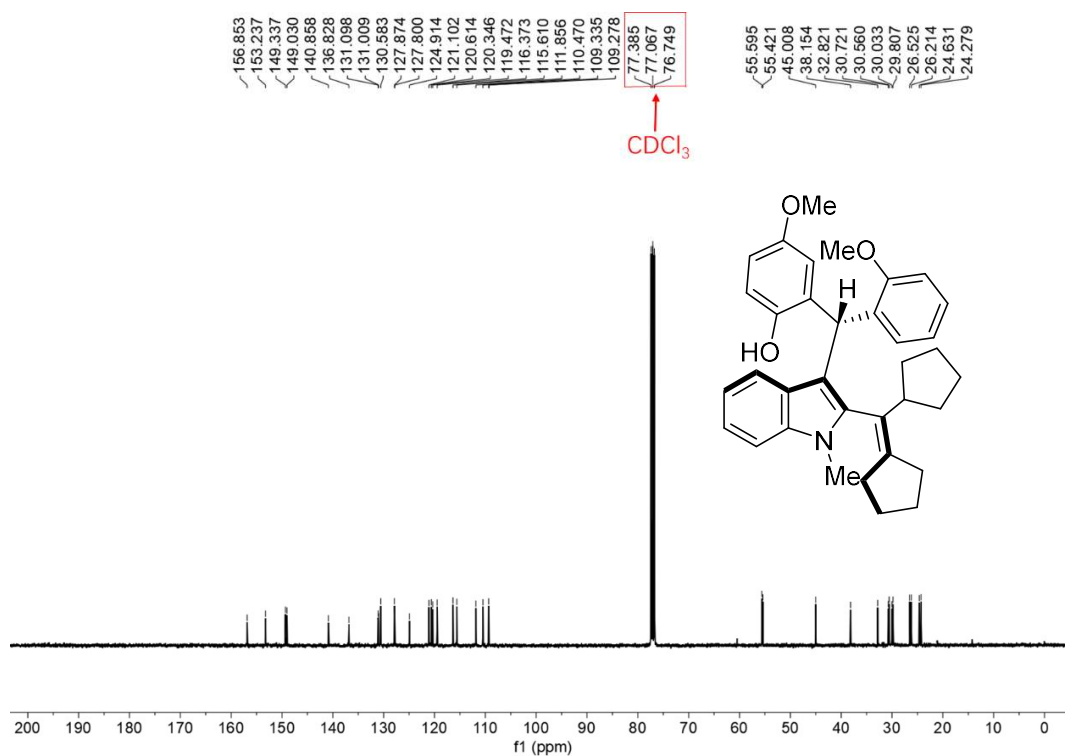



$^1\text{H}$  NMR (400 MHz,  $\text{CDCl}_3$ ) of compound **4ga**:

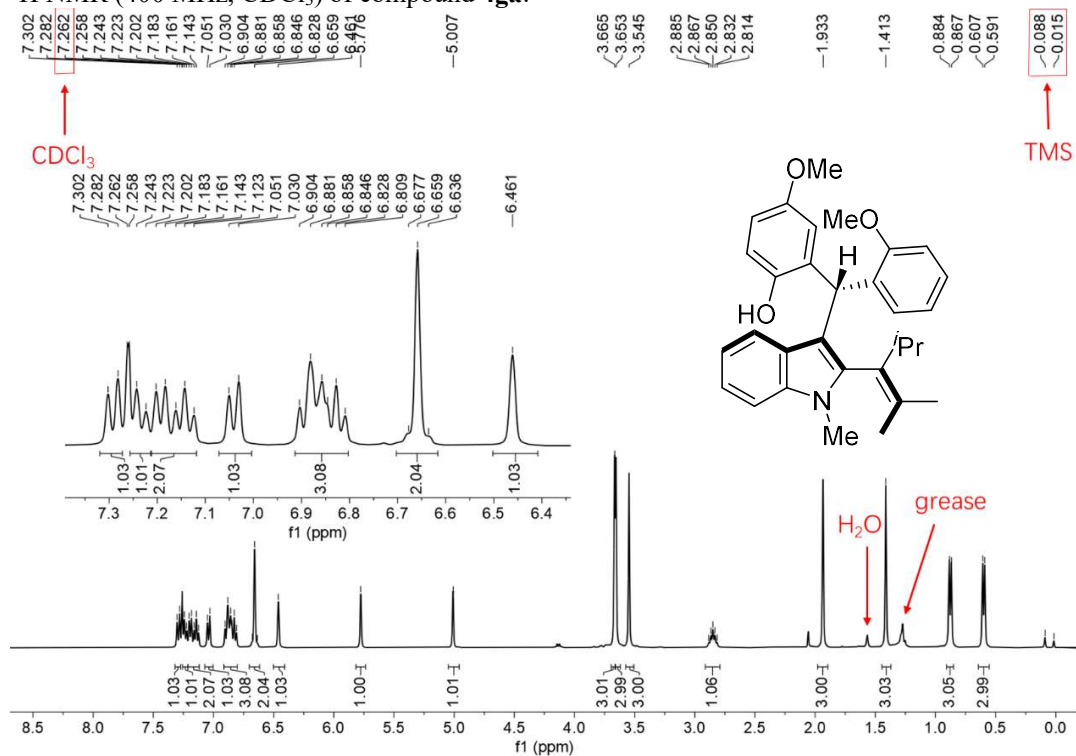

$^{13}\text{C}$  NMR (100 MHz,  $\text{CDCl}_3$ ) of compound **4ga**:

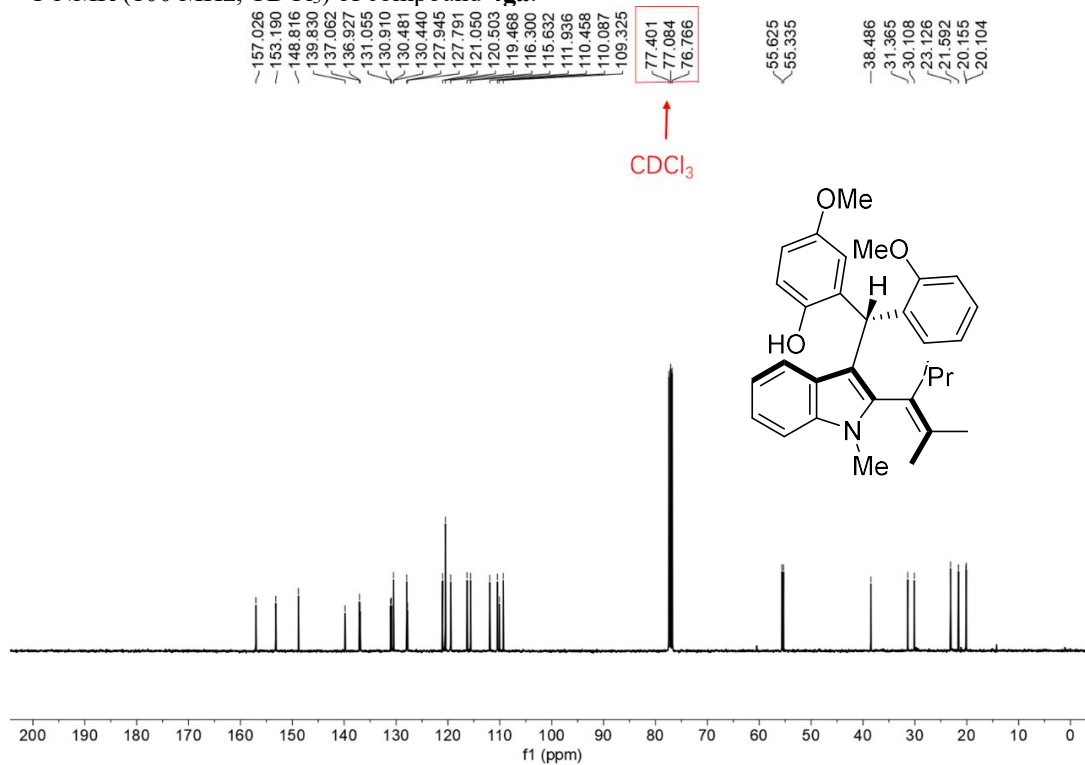

$^1\text{H}$  NMR (400 MHz,  $\text{CDCl}_3$ ) of compound **8**:

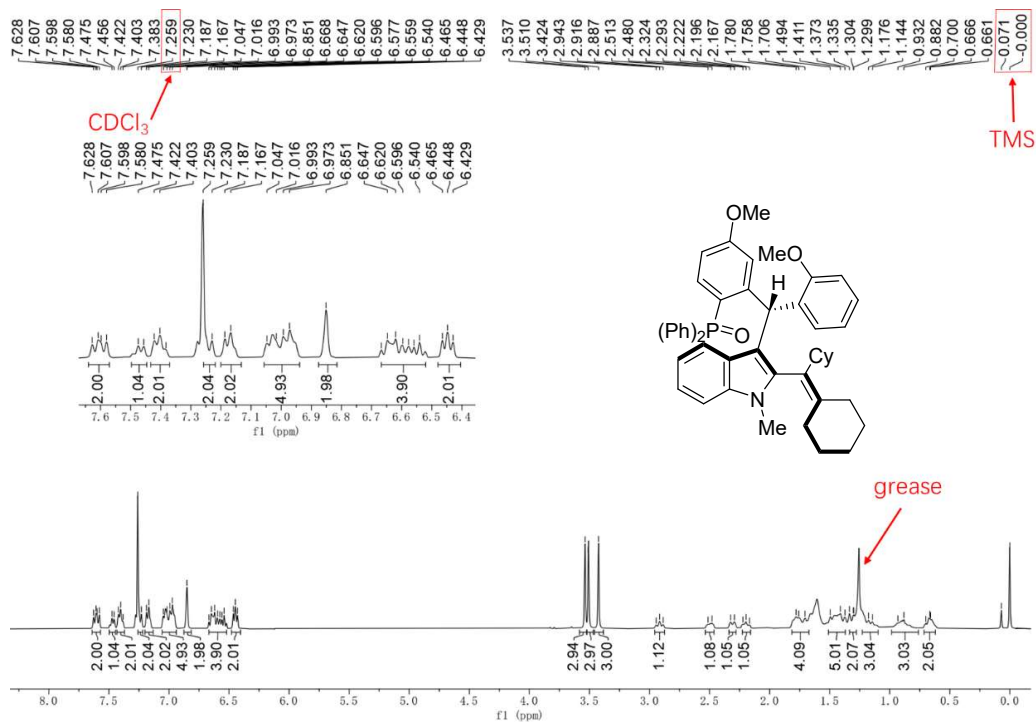

$^{13}\text{C}$  NMR (100 MHz,  $\text{CDCl}_3$ ) of compound **8**:

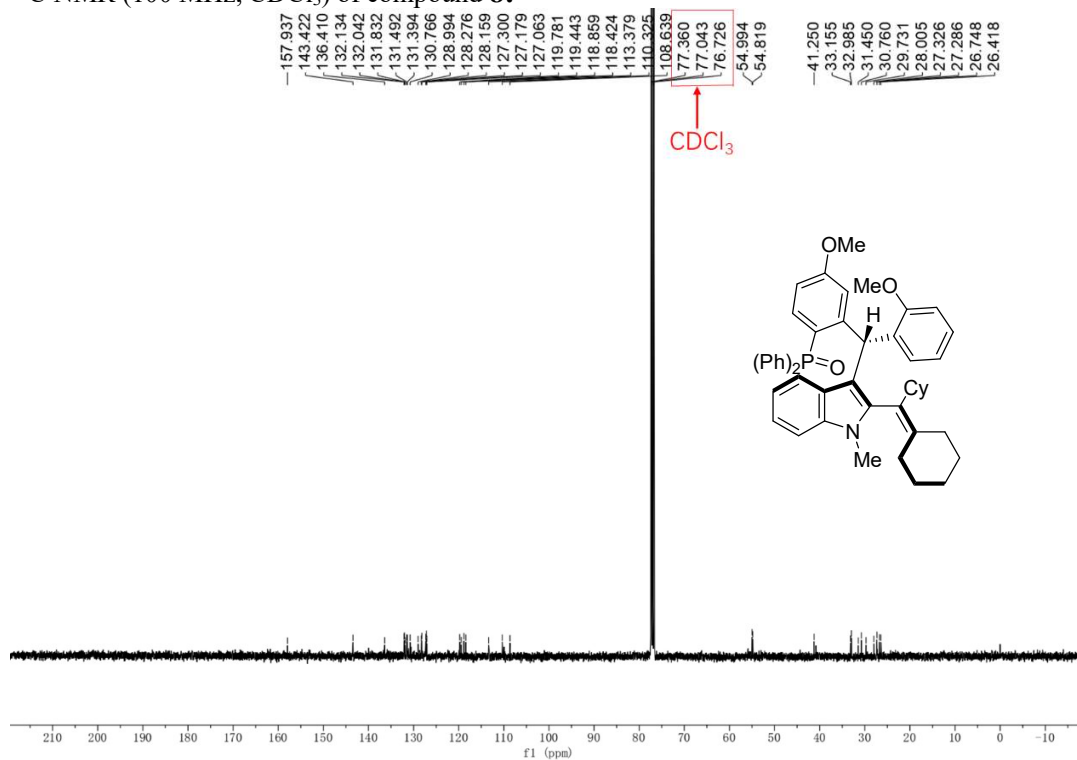

$^{31}\text{P}$  NMR (162 MHz,  $\text{CDCl}_3$ ) of compound **8**:

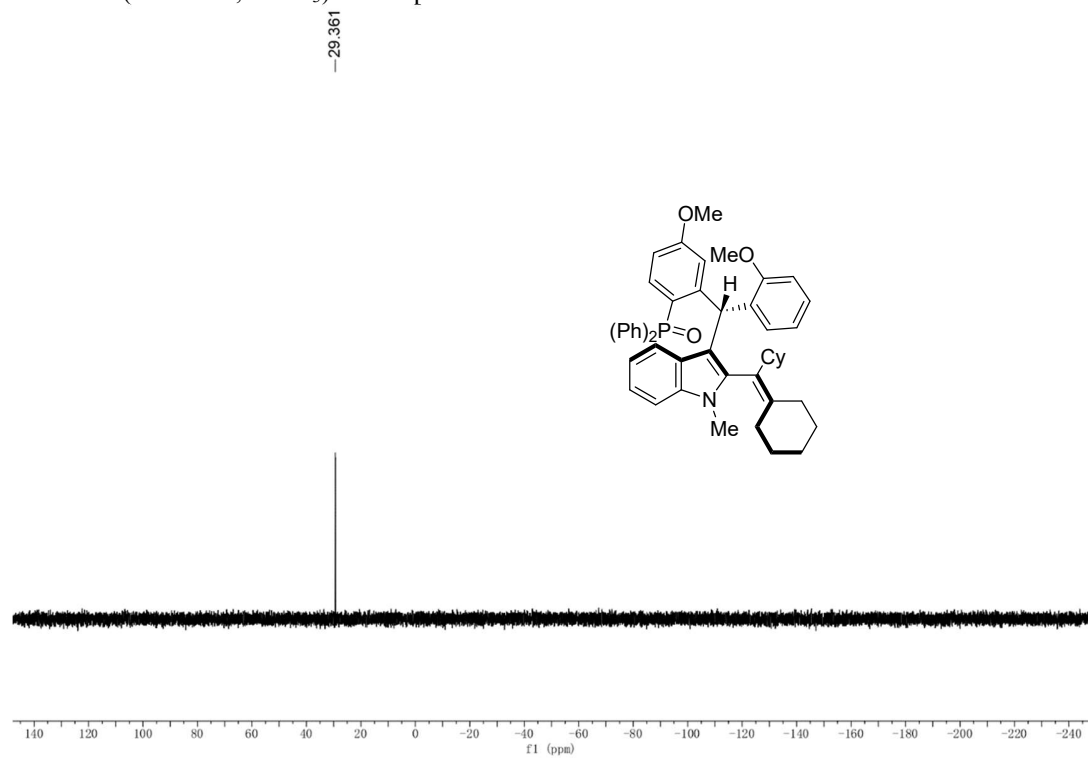

$^1\text{H}$  NMR (400 MHz,  $\text{CDCl}_3$ ) of compound **9**:

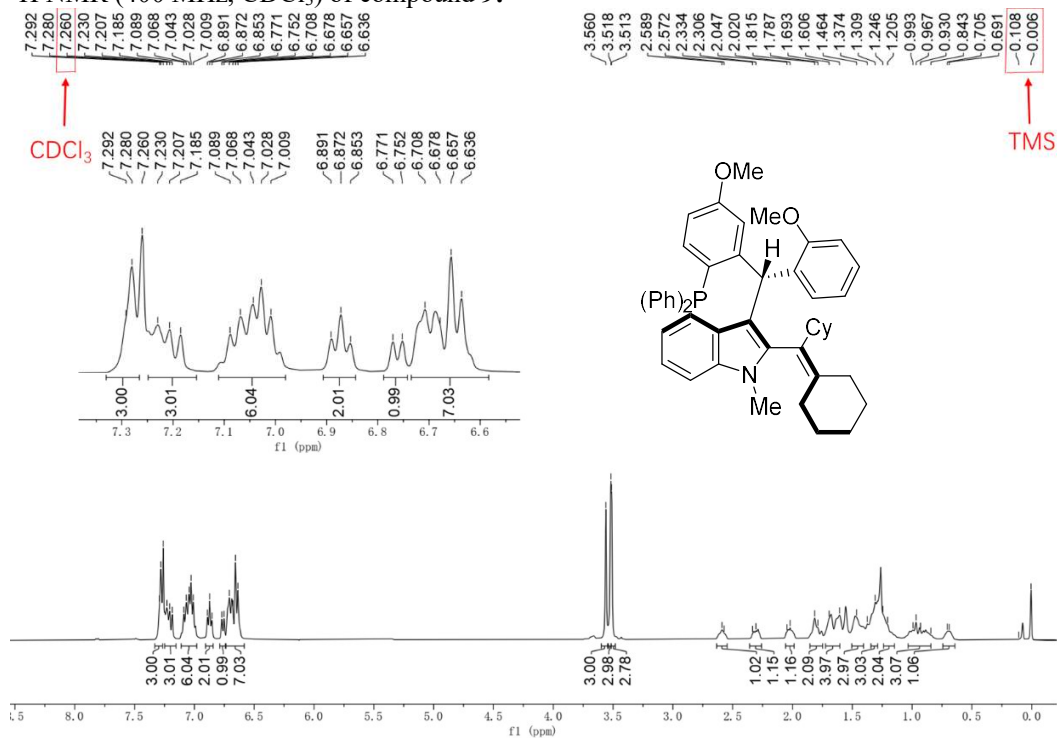

$^{13}\text{C}$  NMR (100 MHz,  $\text{CDCl}_3$ ) of compound **9**:

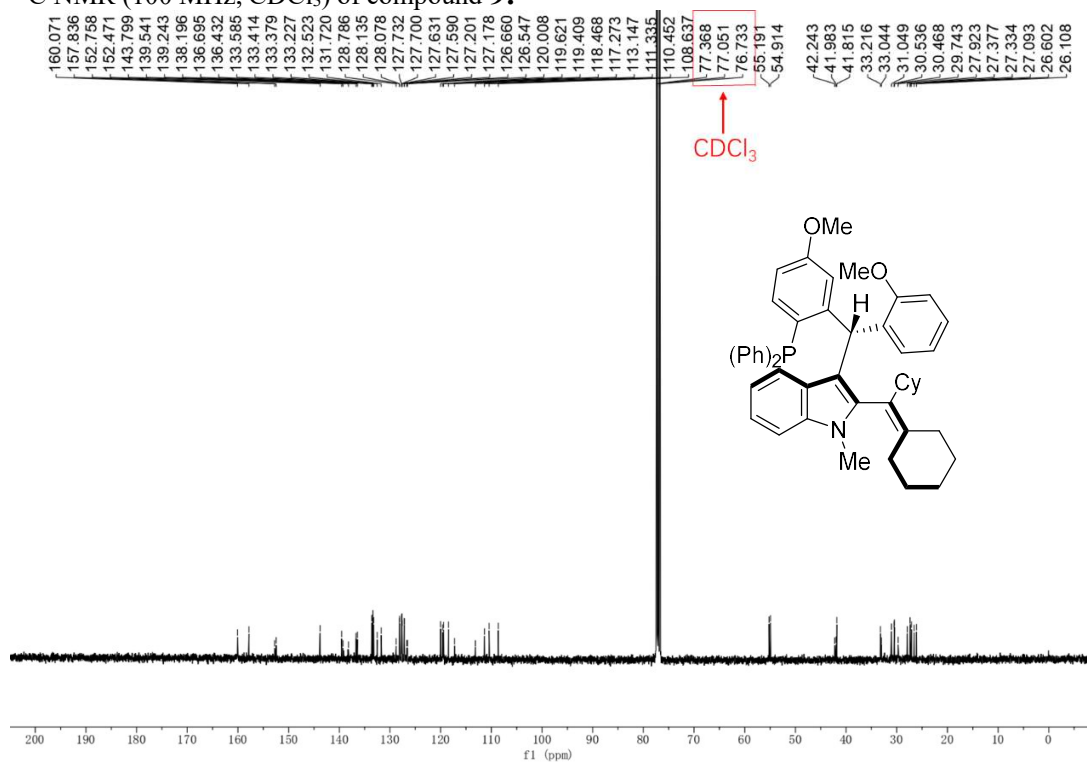

$^{31}\text{P}$  NMR (162 MHz,  $\text{CDCl}_3$ ) of compound **9**:

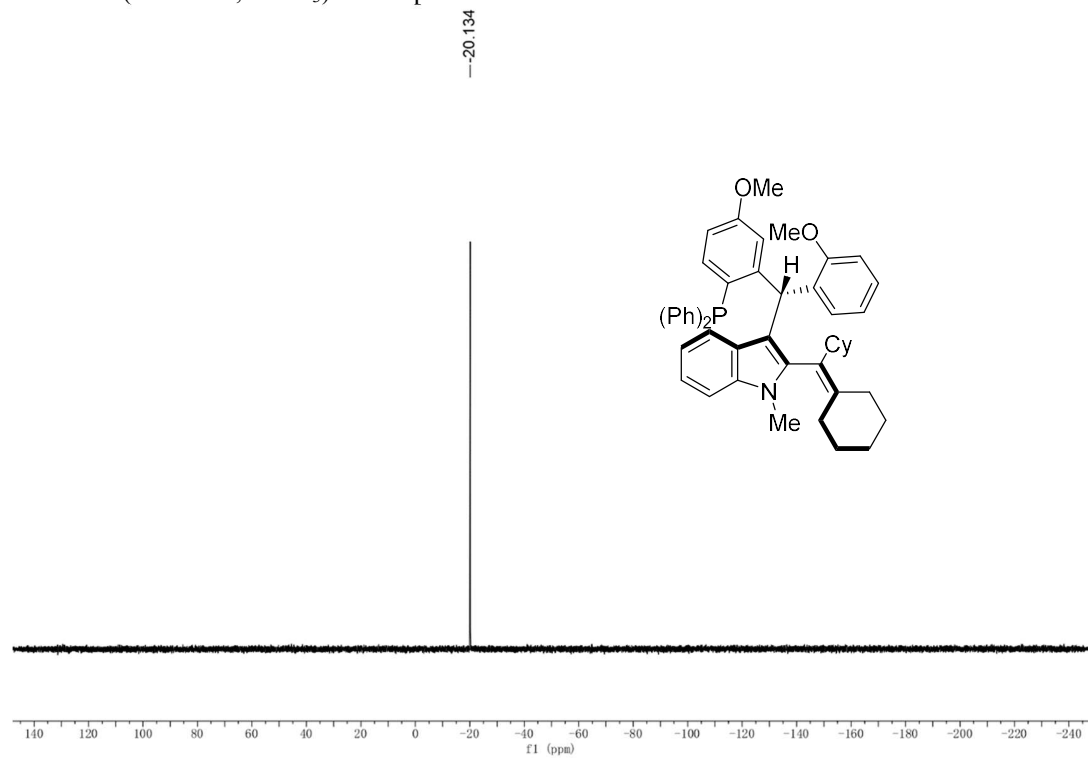

<sup>1</sup>H NMR (400 MHz, CDCl<sub>3</sub>) of compound **10**:

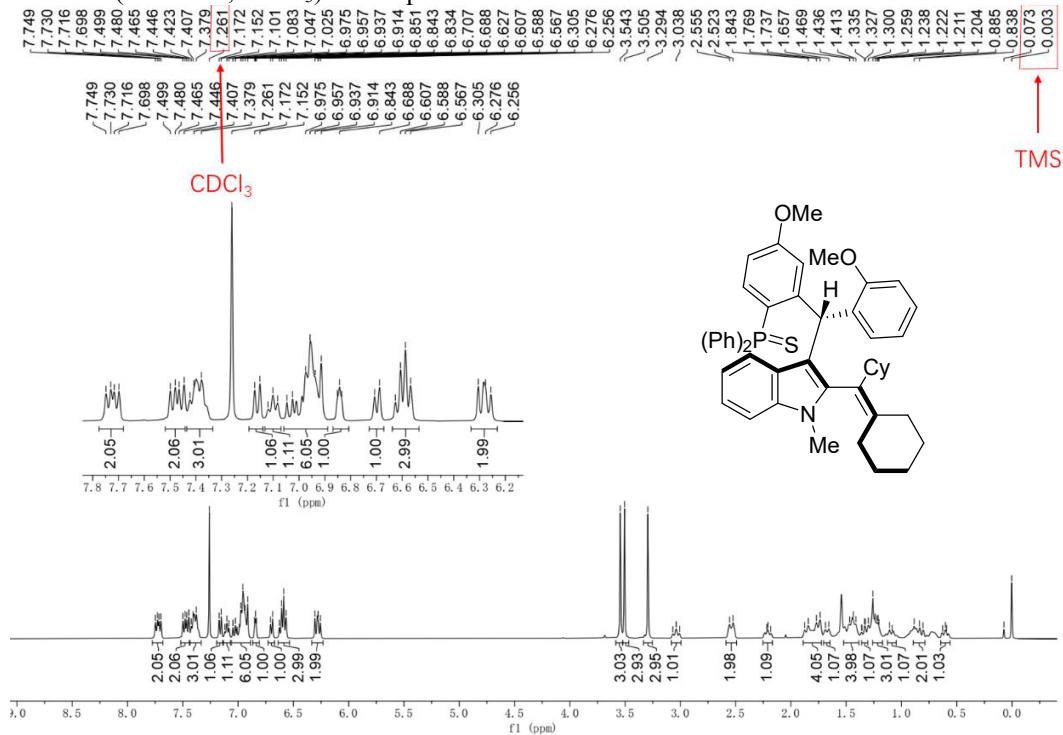

<sup>13</sup>C NMR (100 MHz, CDCl<sub>3</sub>) of compound **10**:

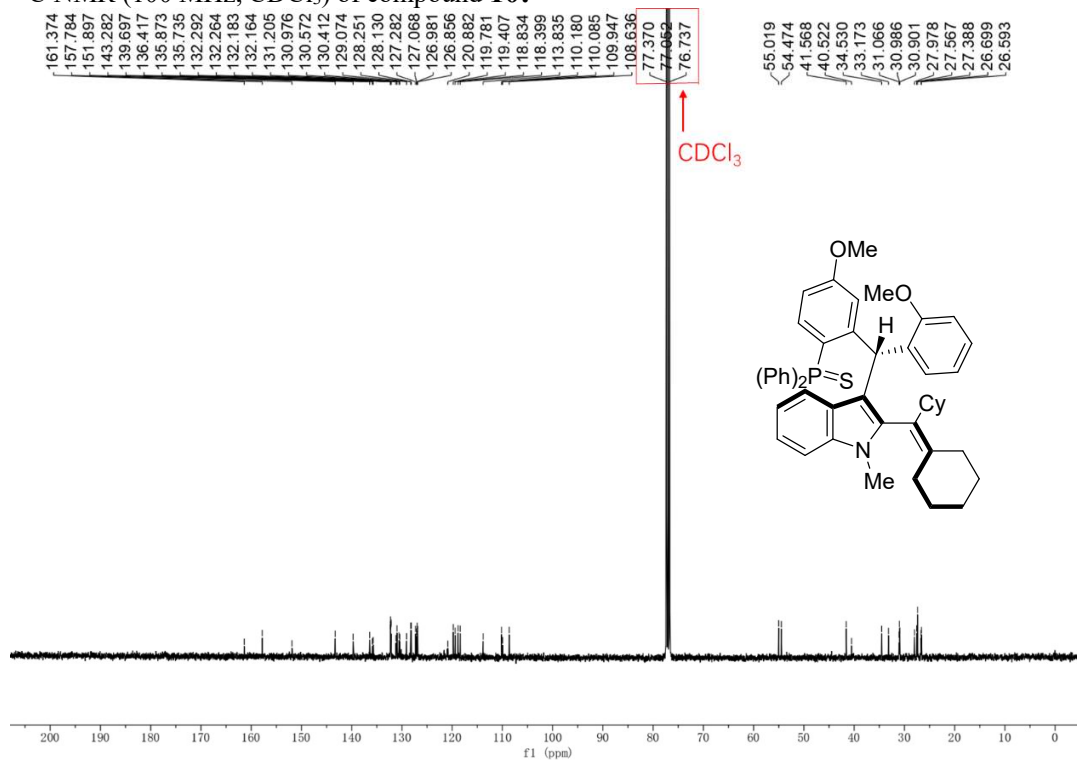

$^{31}\text{P}$  NMR (162 MHz,  $\text{CDCl}_3$ ) of compound **10**:

-41.116

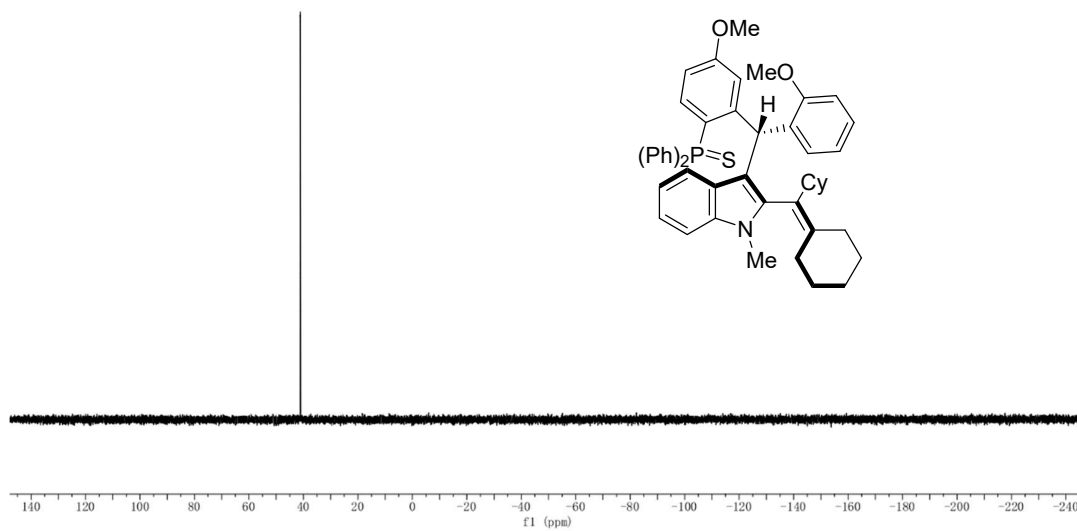

<sup>1</sup>H NMR (400 MHz, CDCl<sub>3</sub>) of compound **13**:

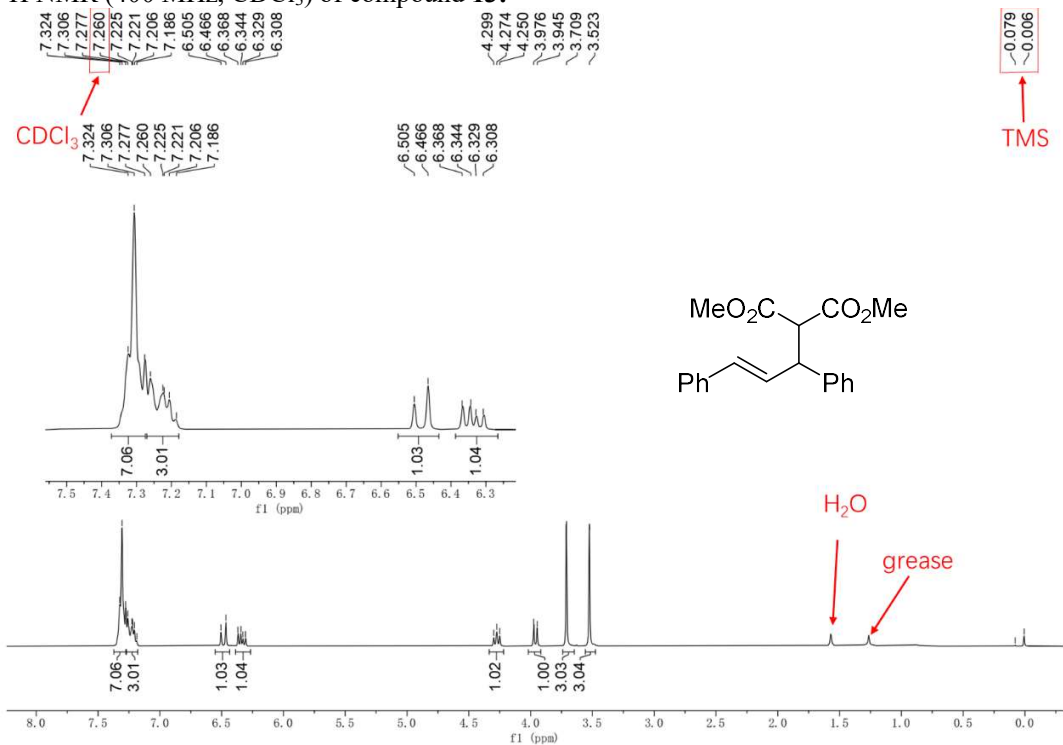

<sup>13</sup>C NMR (100 MHz, CDCl<sub>3</sub>) of compound **13**:

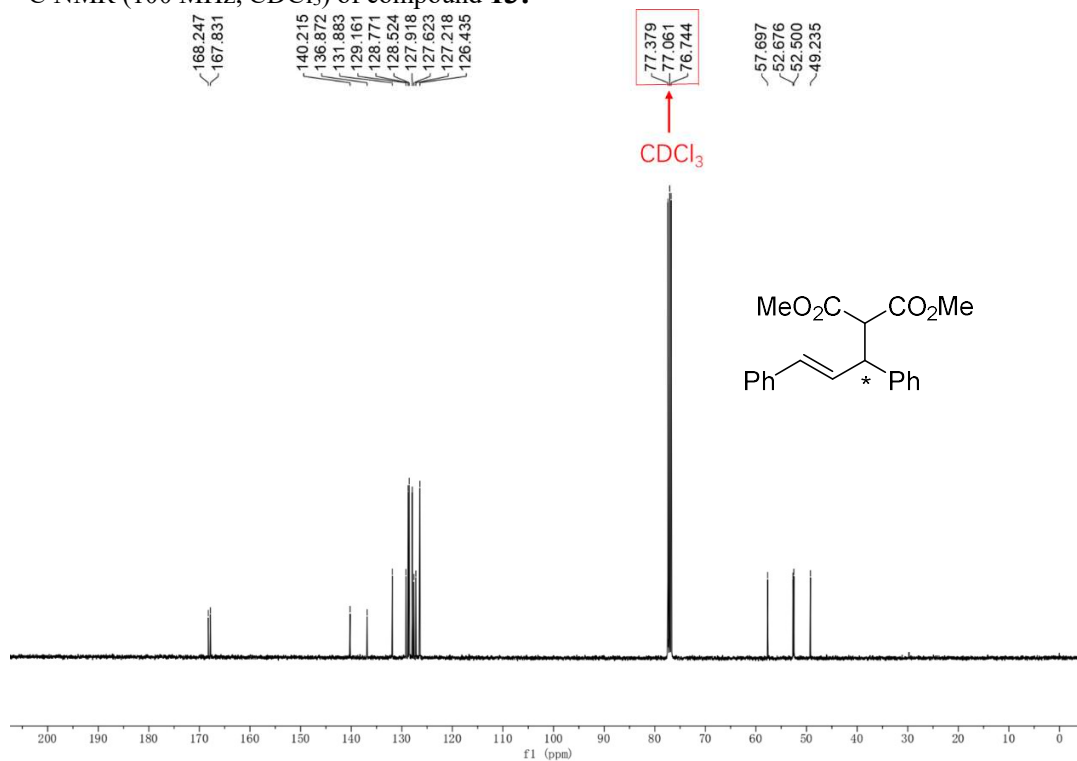



$^1\text{H}$  NMR (400 MHz,  $\text{CDCl}_3$ ) of compound **S12**:

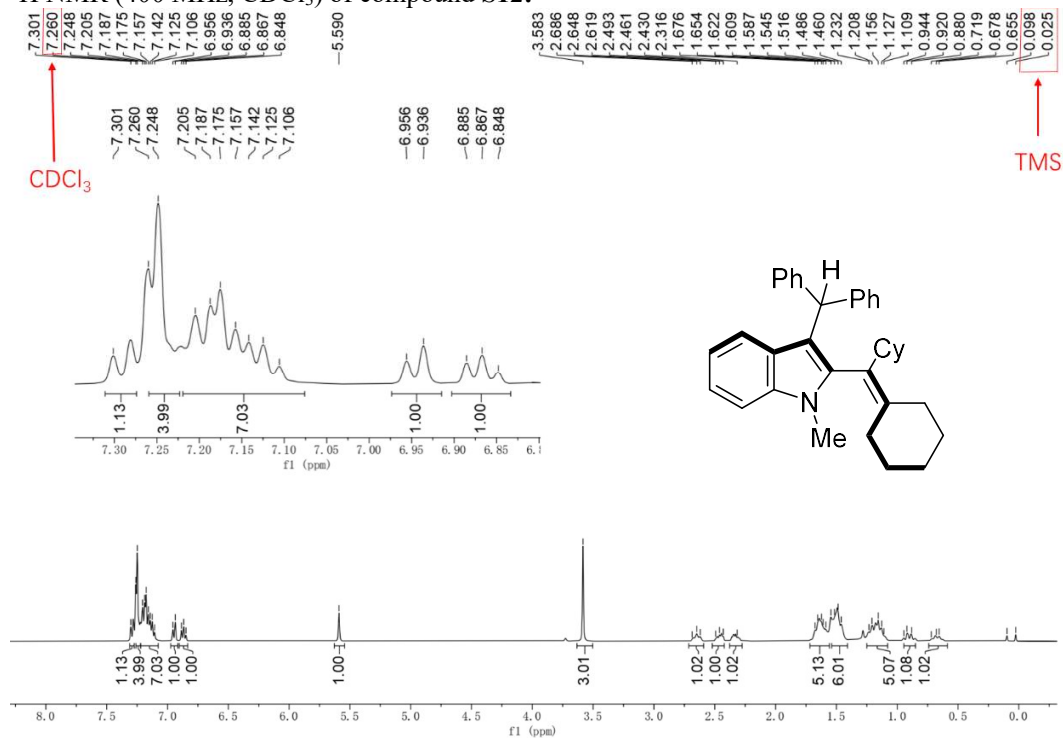

$^{13}\text{C}$  NMR (100 MHz,  $\text{CDCl}_3$ ) of compound **S12**:

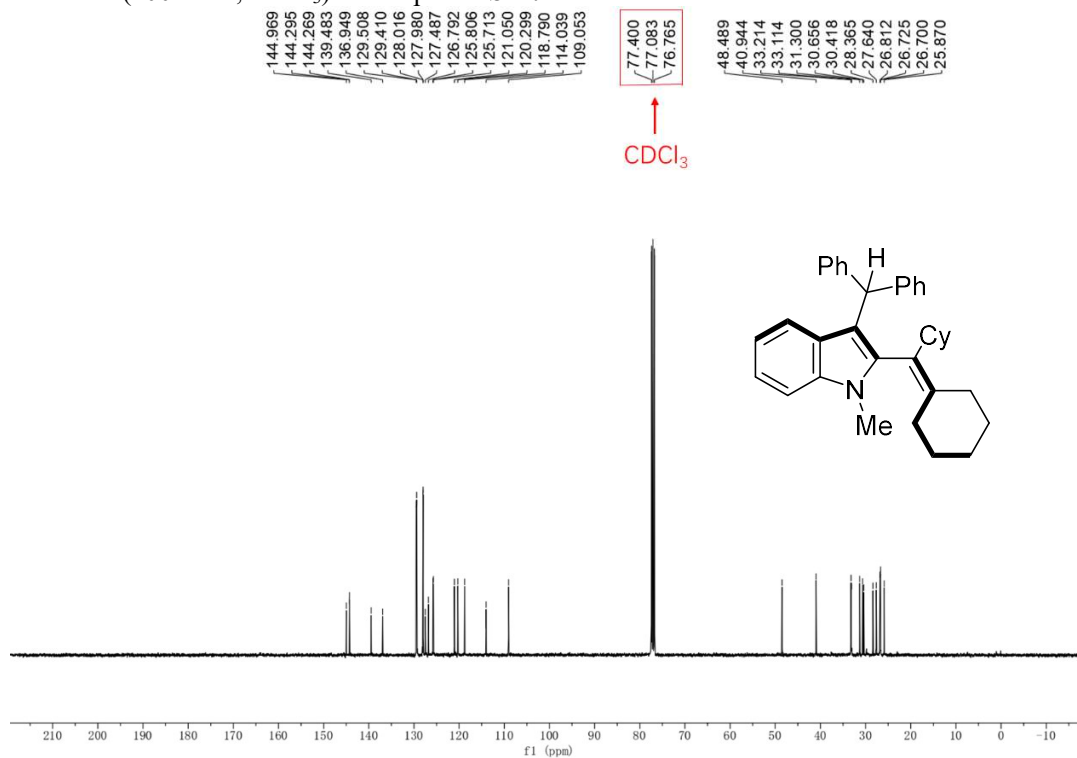

## 14. HPLC traces of compounds 3, 4, 8, 10, 13 and S12

**3aa**

Racemic:

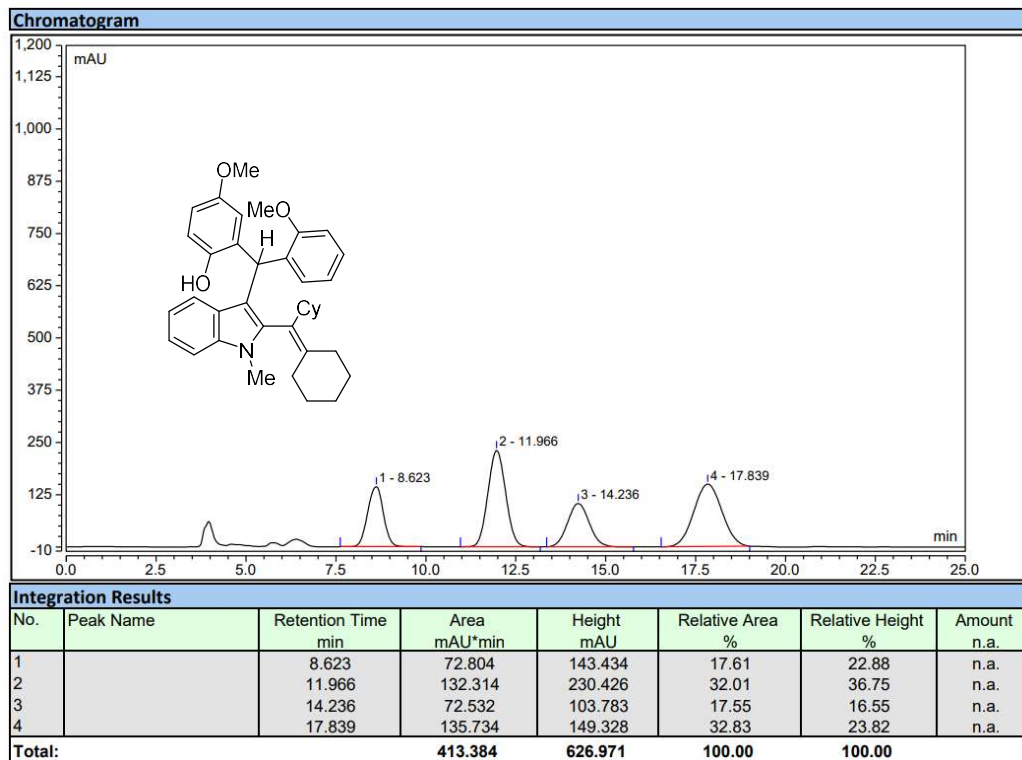

Enantioselective (inseparable diastereomers with 95:5 dr):

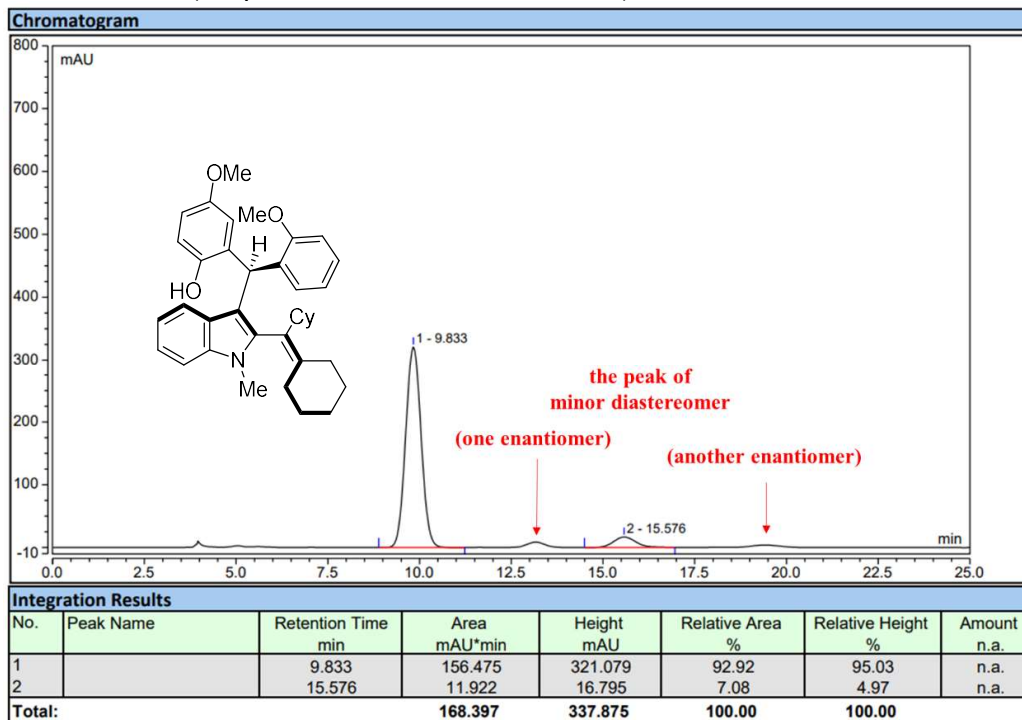

### 3ab

Racemic:

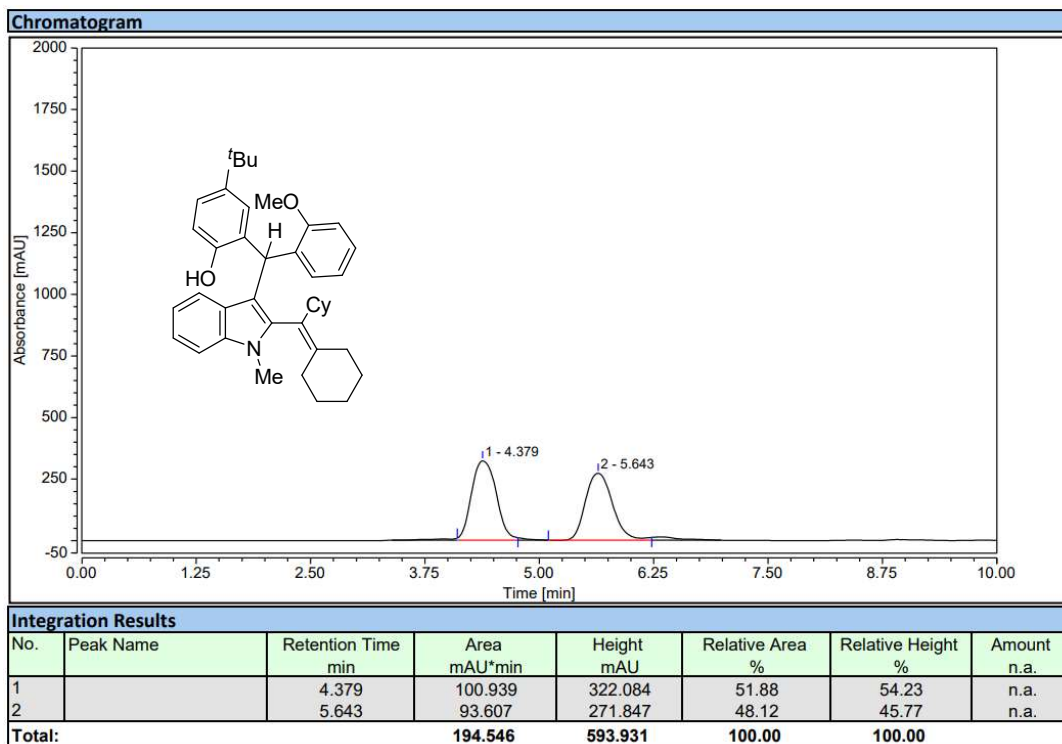

Enantioselective:

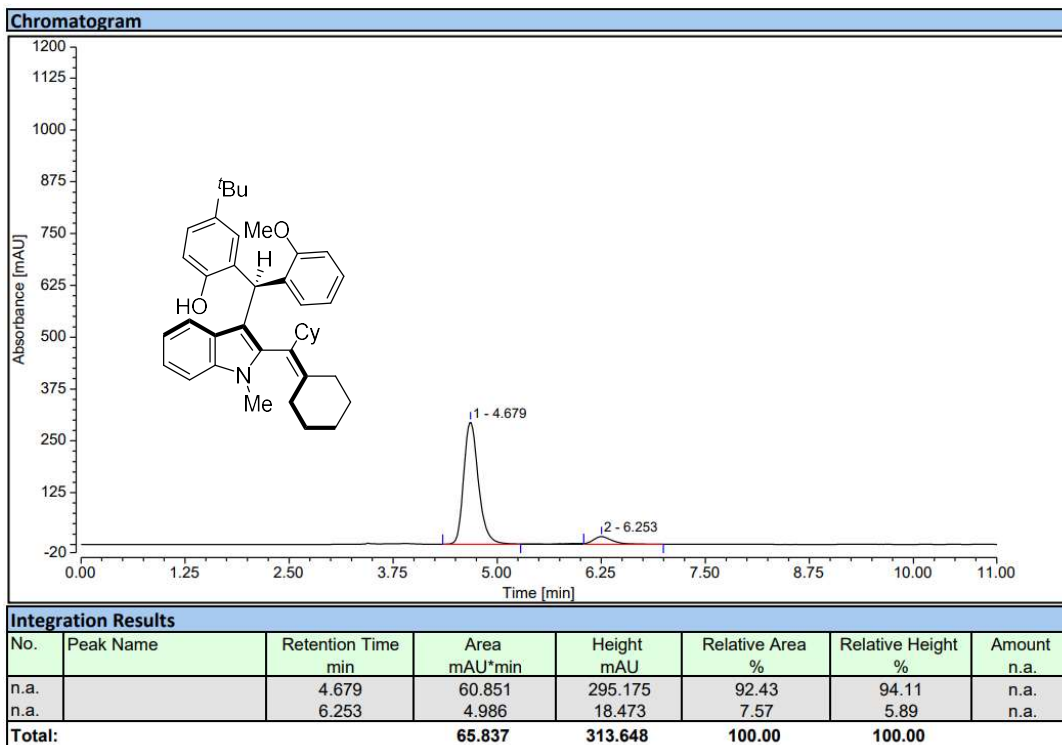

### 3ac

Racemic:

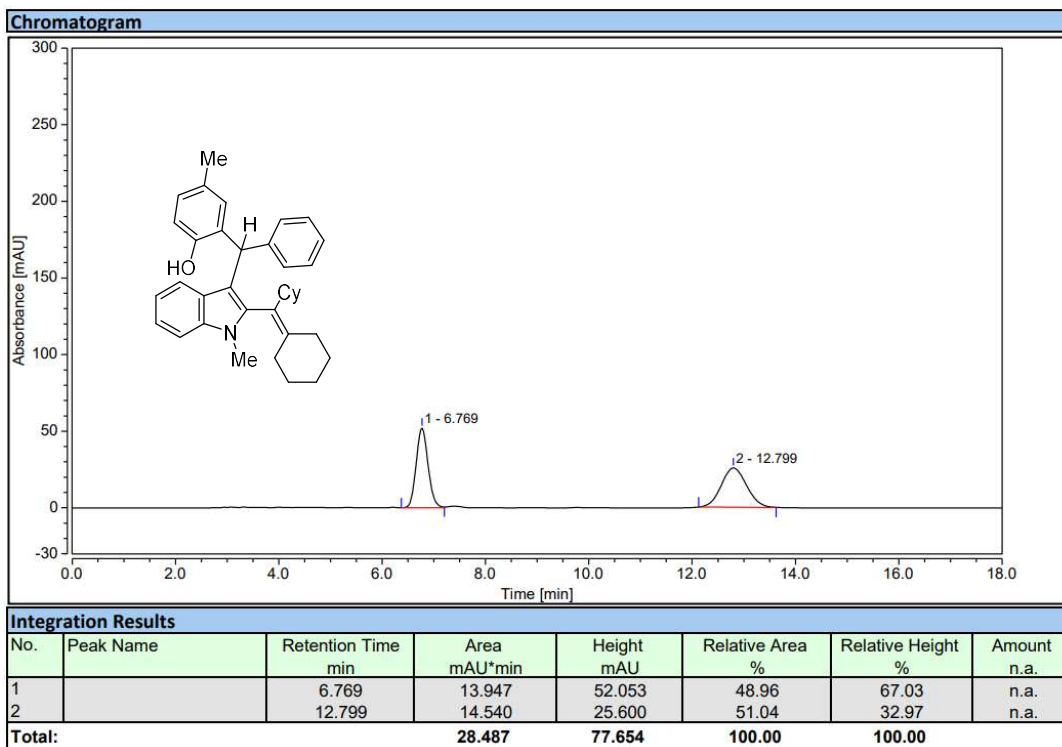

Enantioselective:

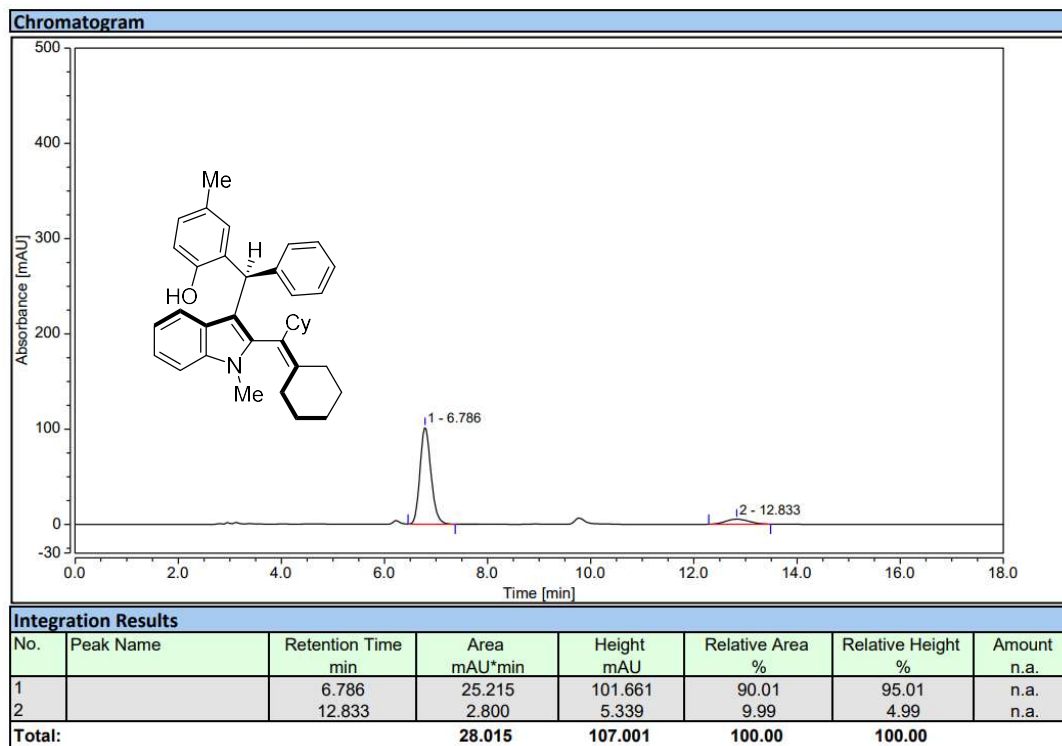

### 3ad

Racemic:

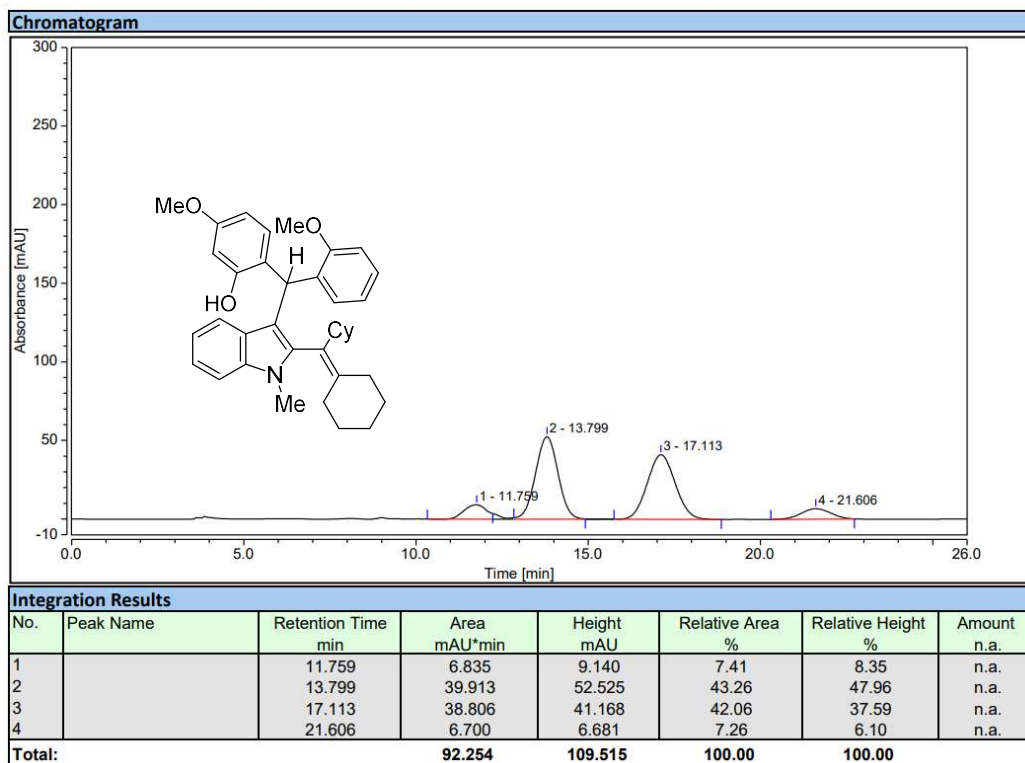

Enantioselective (inseparable diastereomers with 90:10 dr):

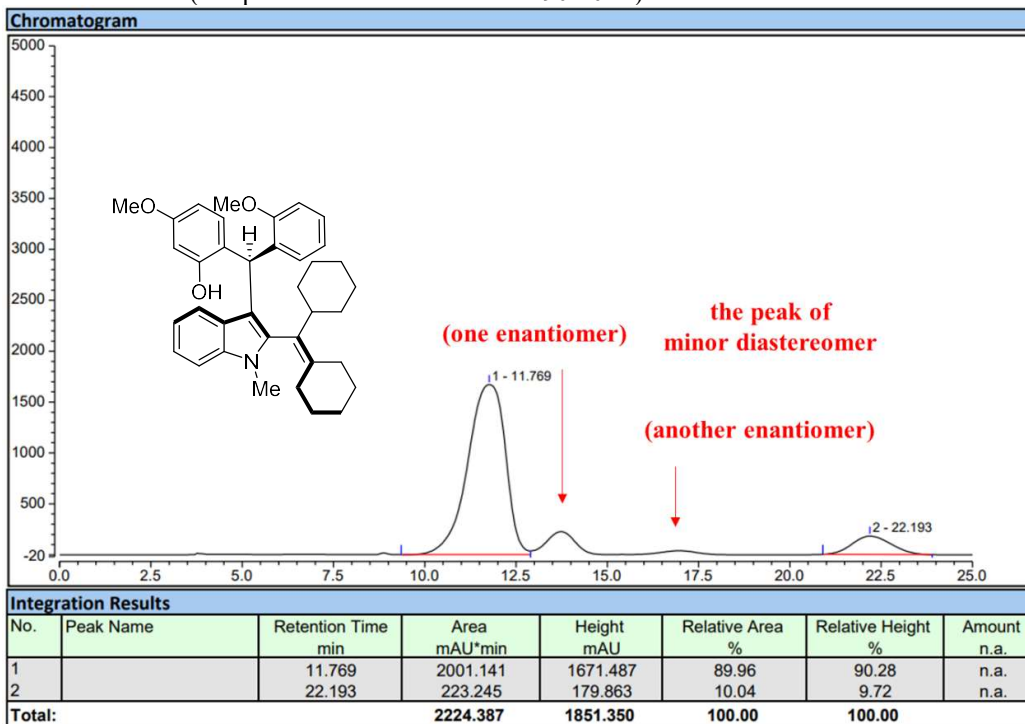

3ae

Racemic:

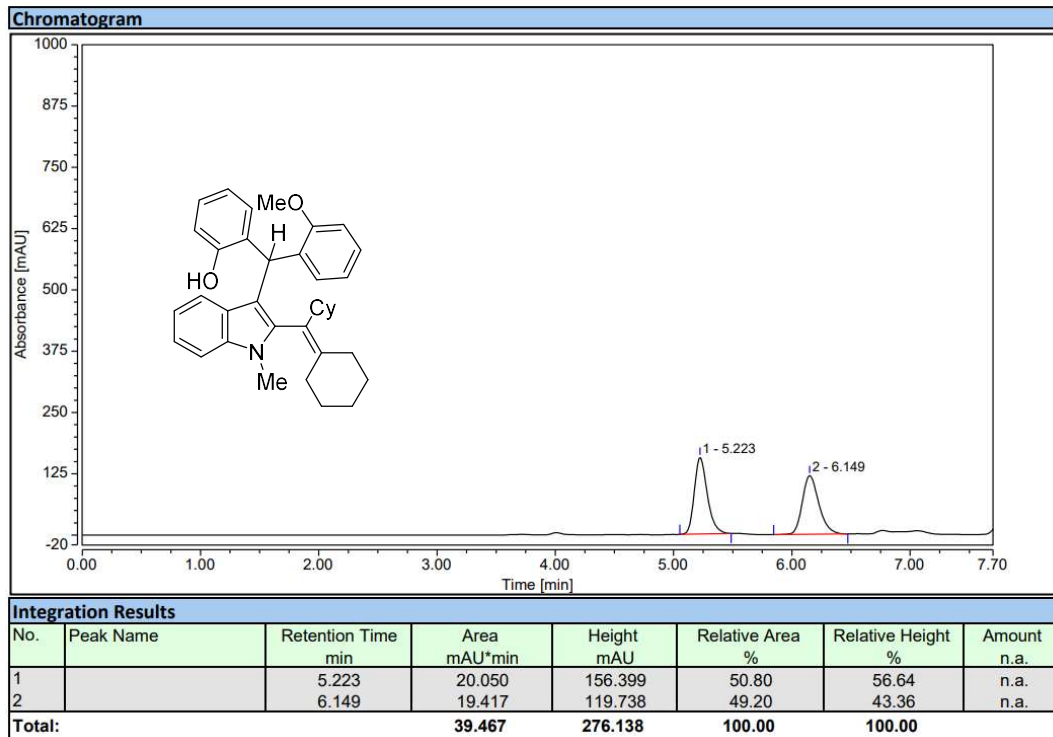

Enantioselective:

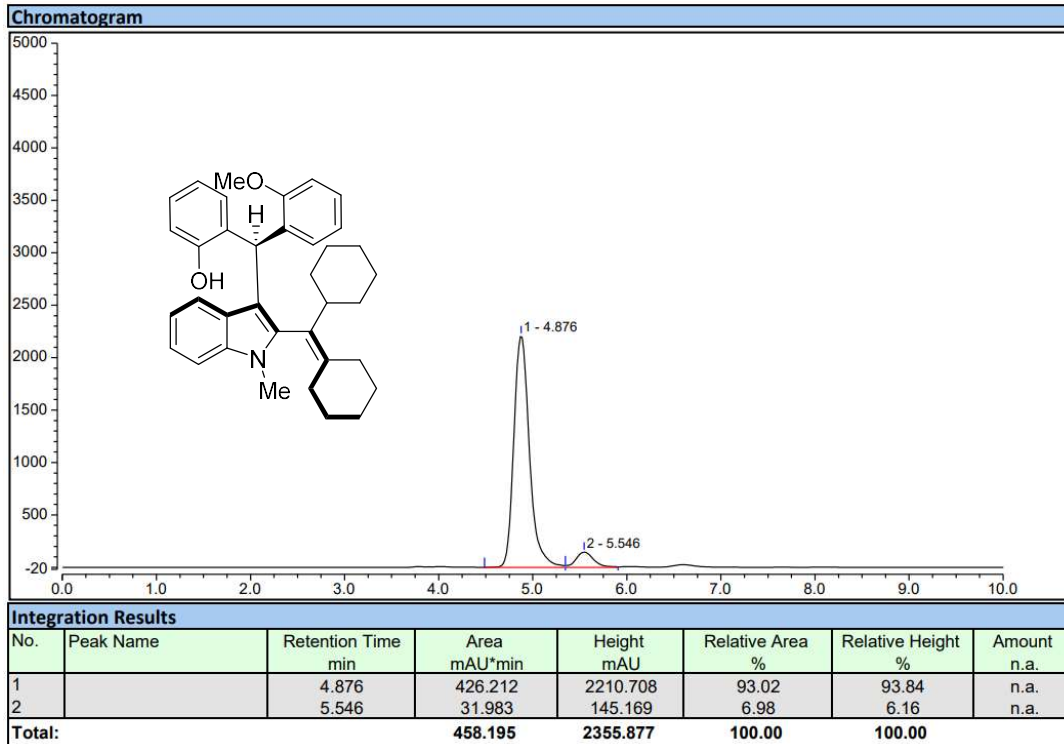

### 3af

Racemic:

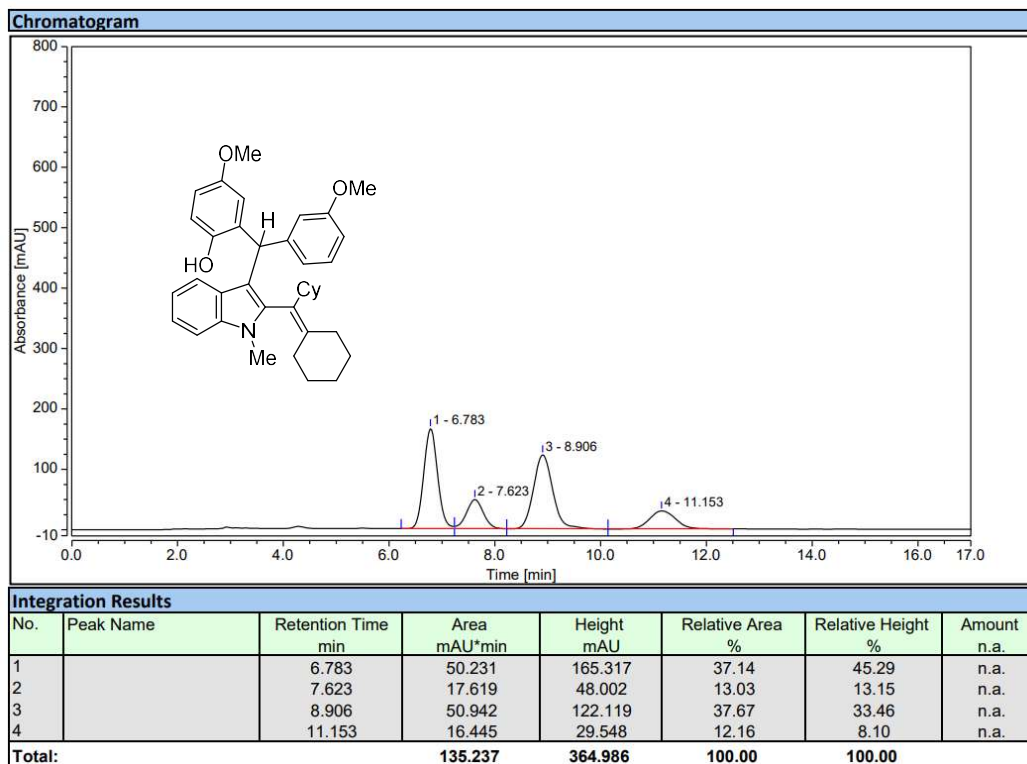

Enantioselective (inseparable diastereomers with 85:15 dr):

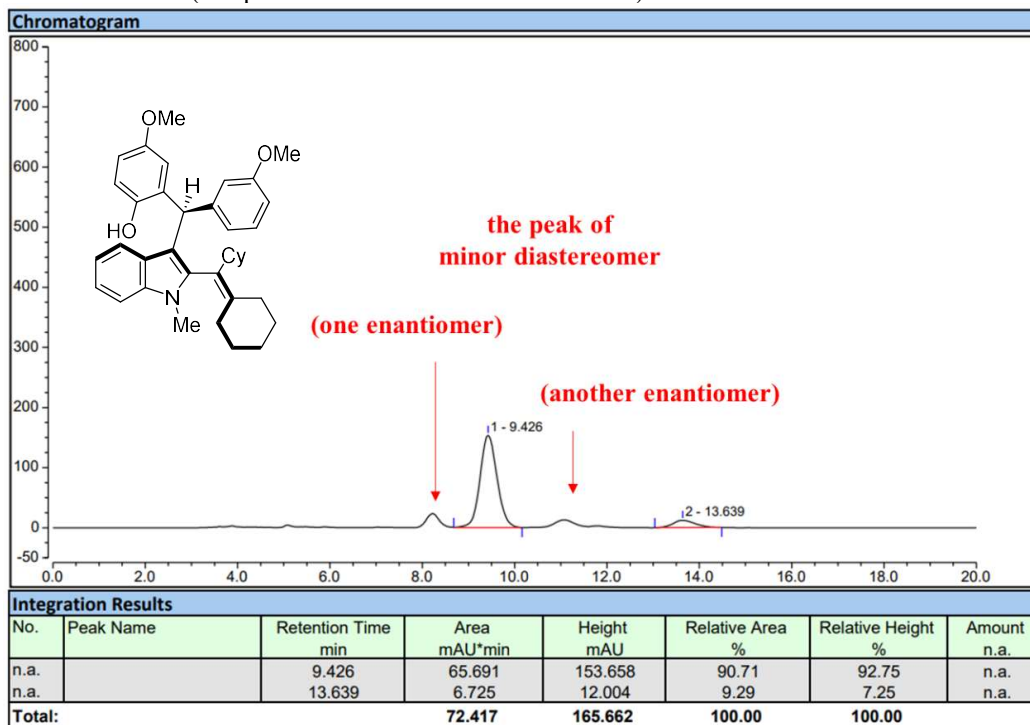

3ag

Racemic:

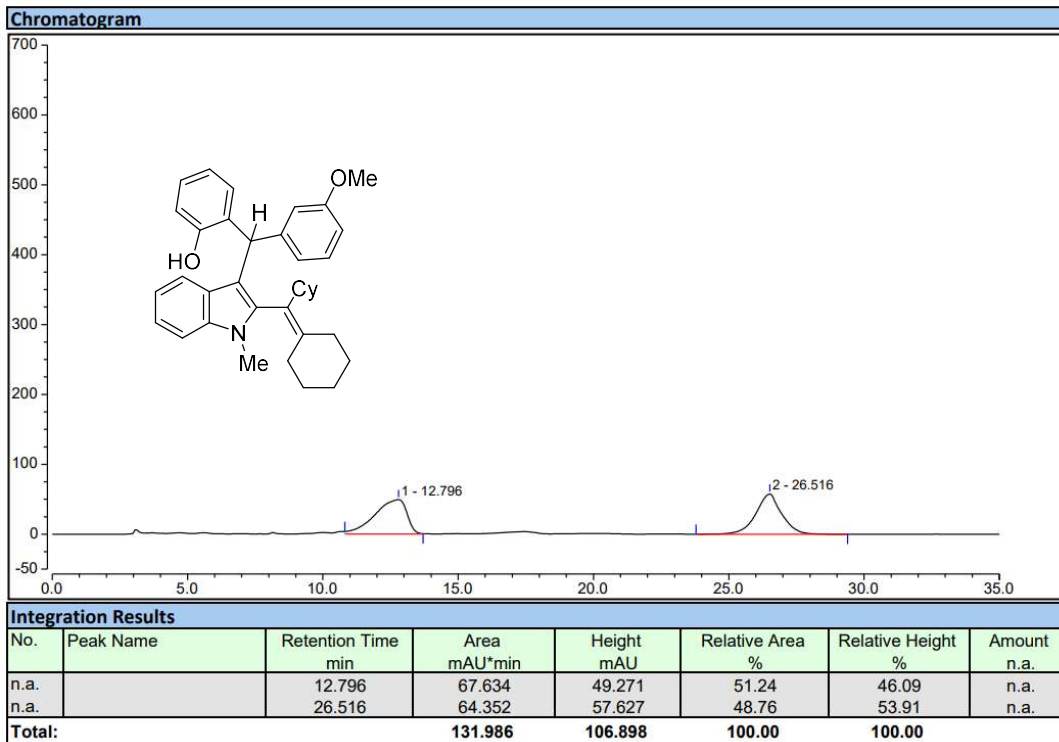

Enantioselective:

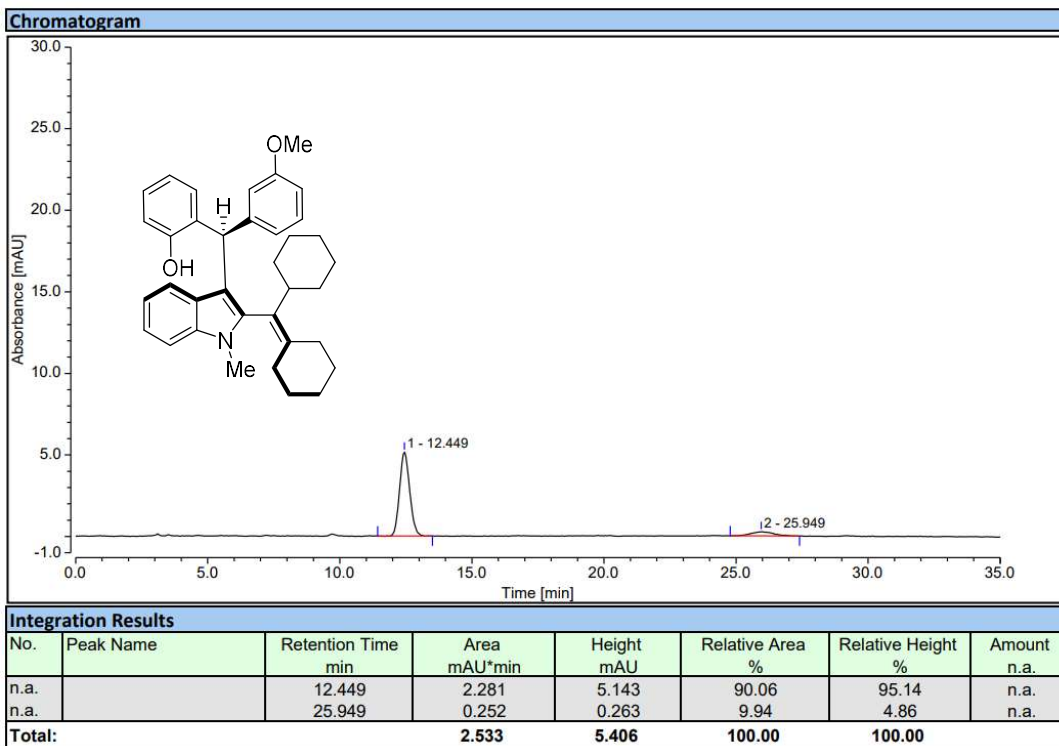



### 3ah

Racemic:

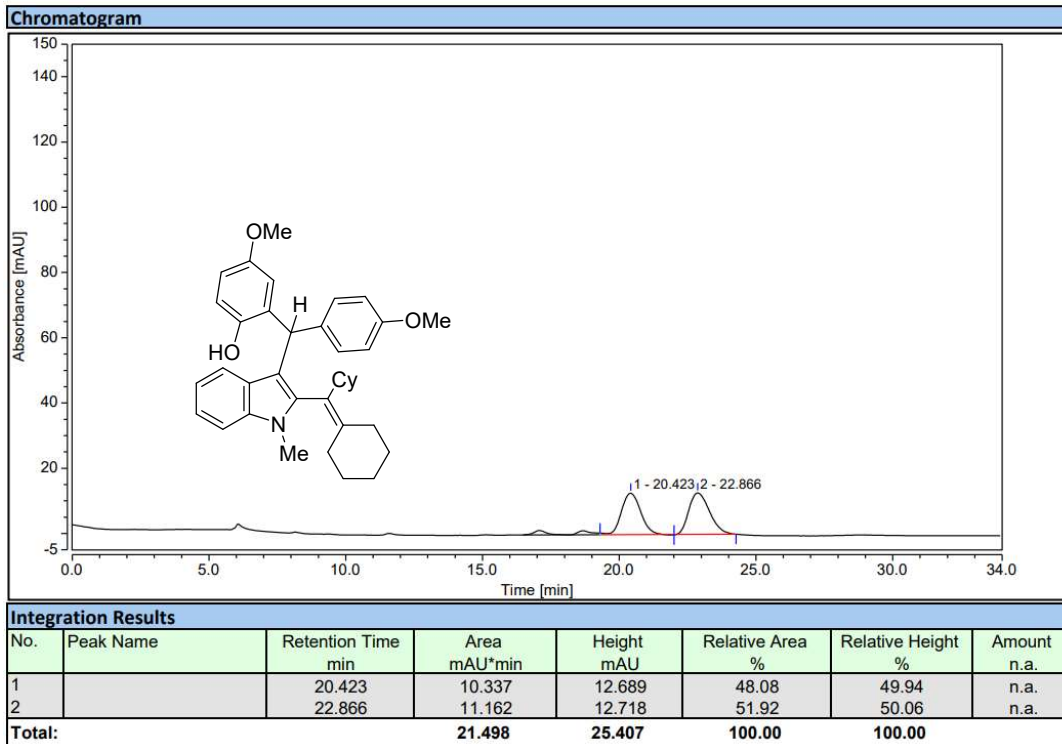

Enantioselective:

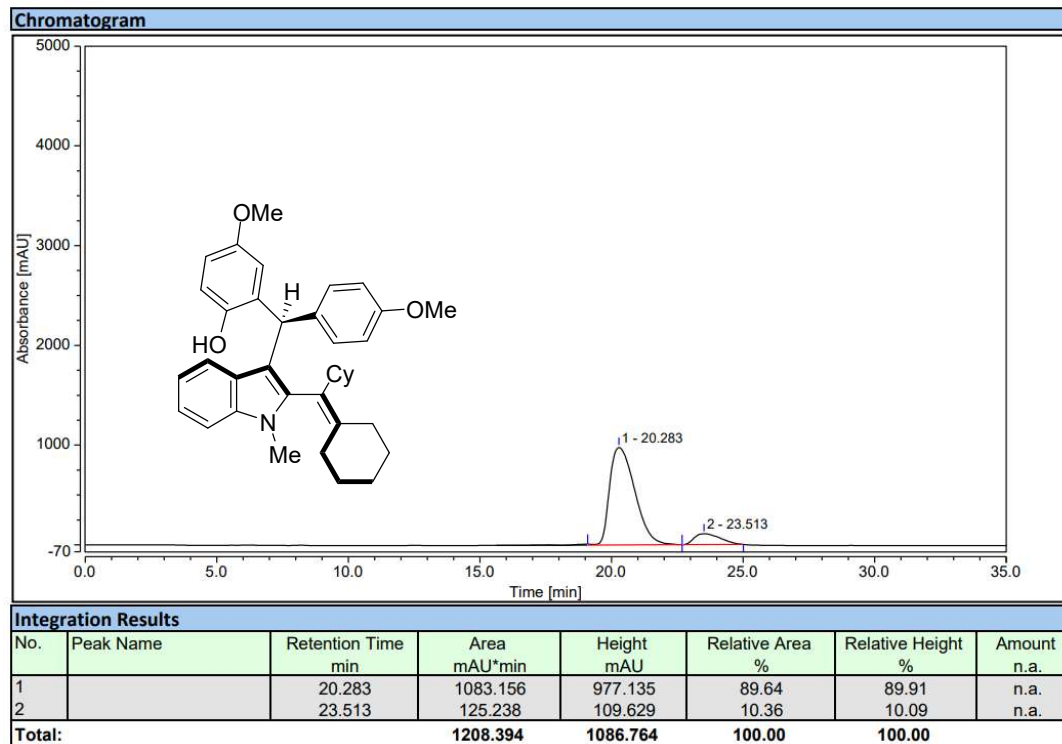

3ai

Racemic:

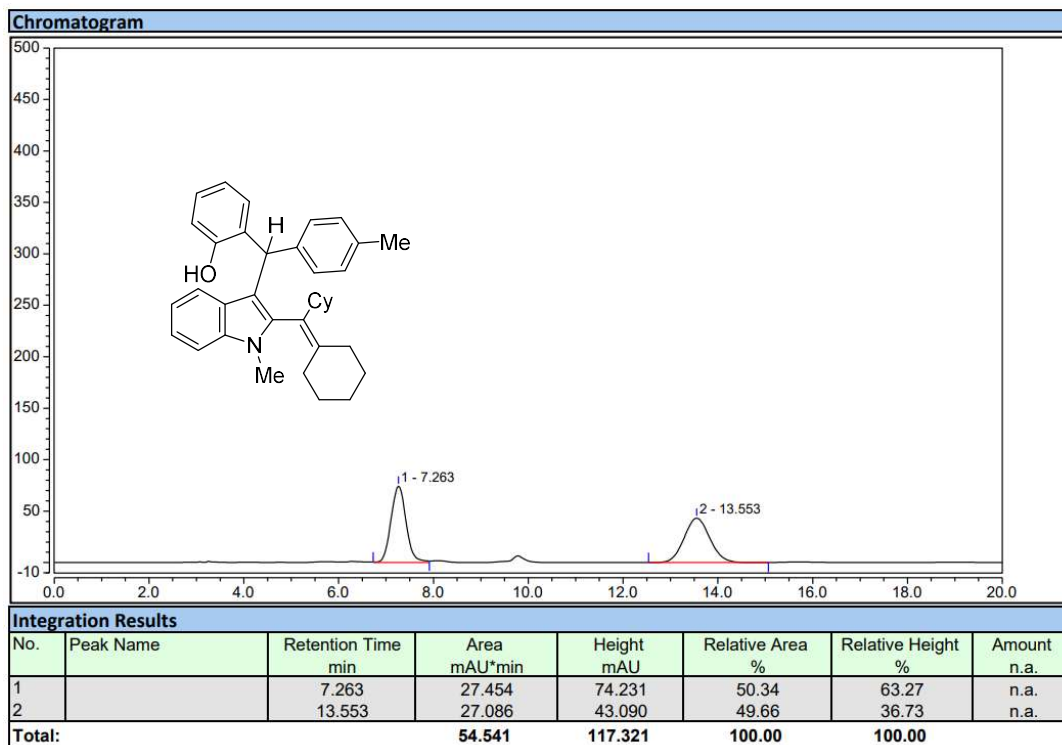

Enantioselective:

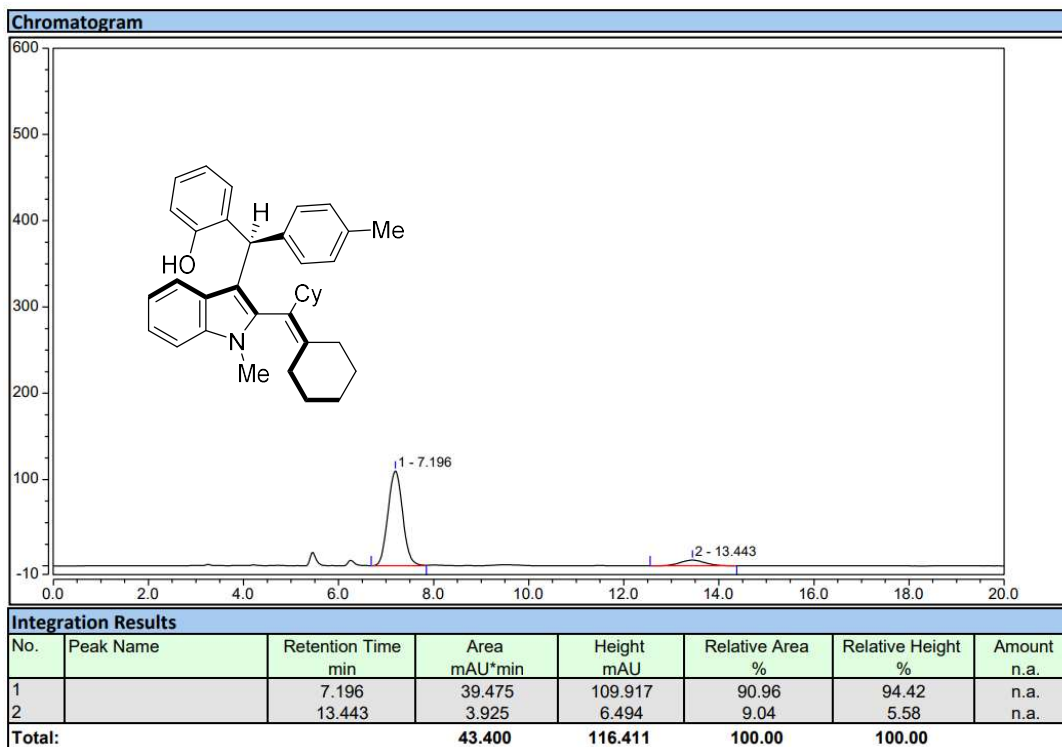

3aj

Racemic:

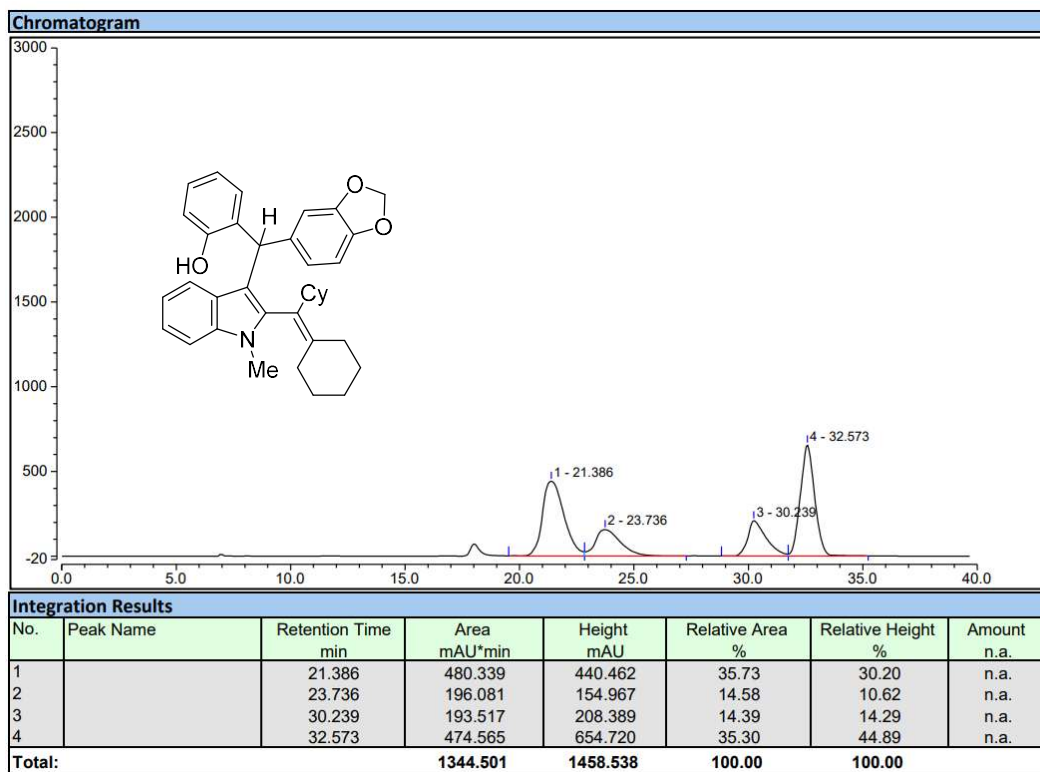

Enantioselective (inseparable diastereomers with 82:18 dr):

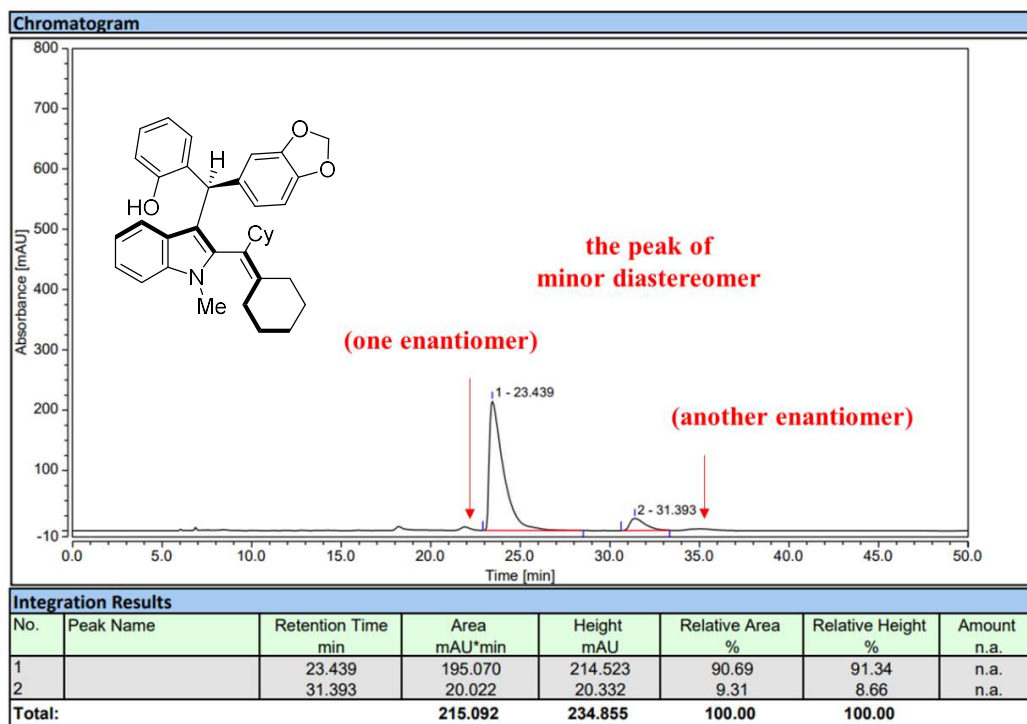

### 3ak

Racemic:

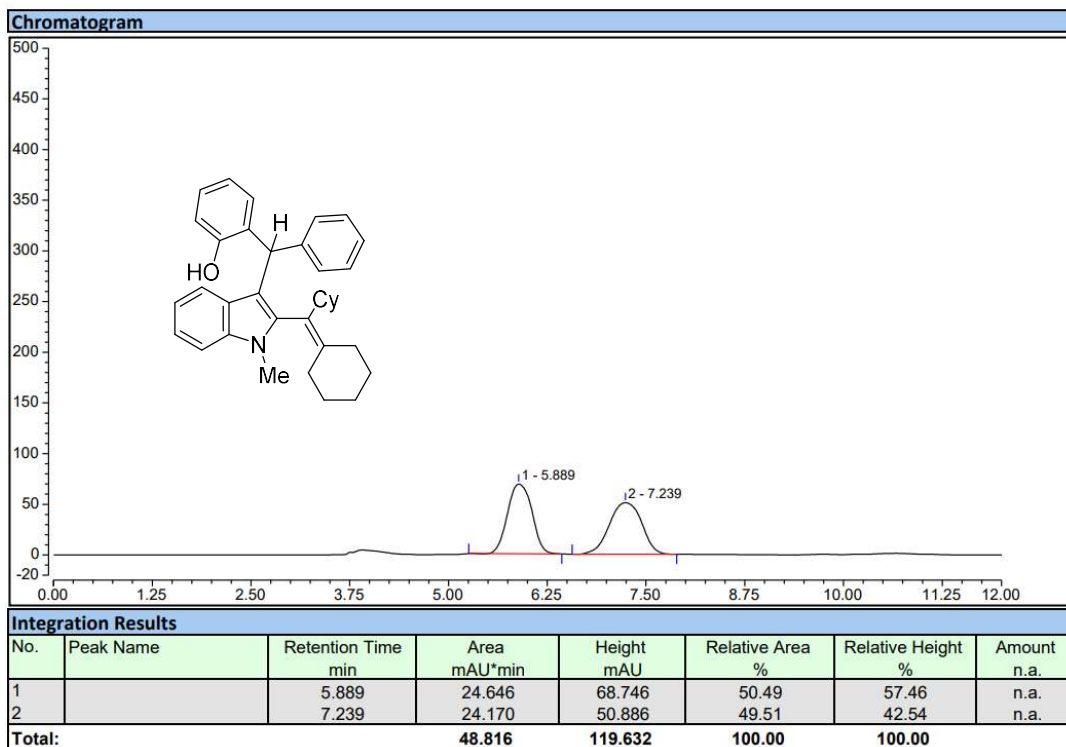

Enantioselective:

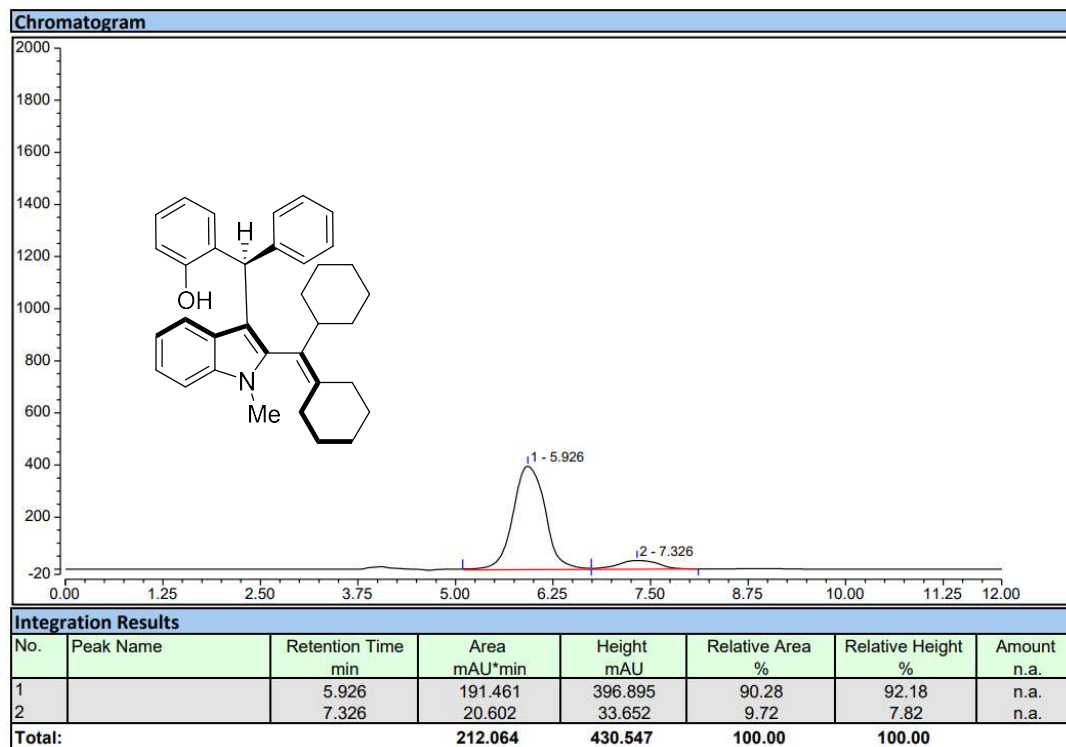

### 3ba

Racemic:

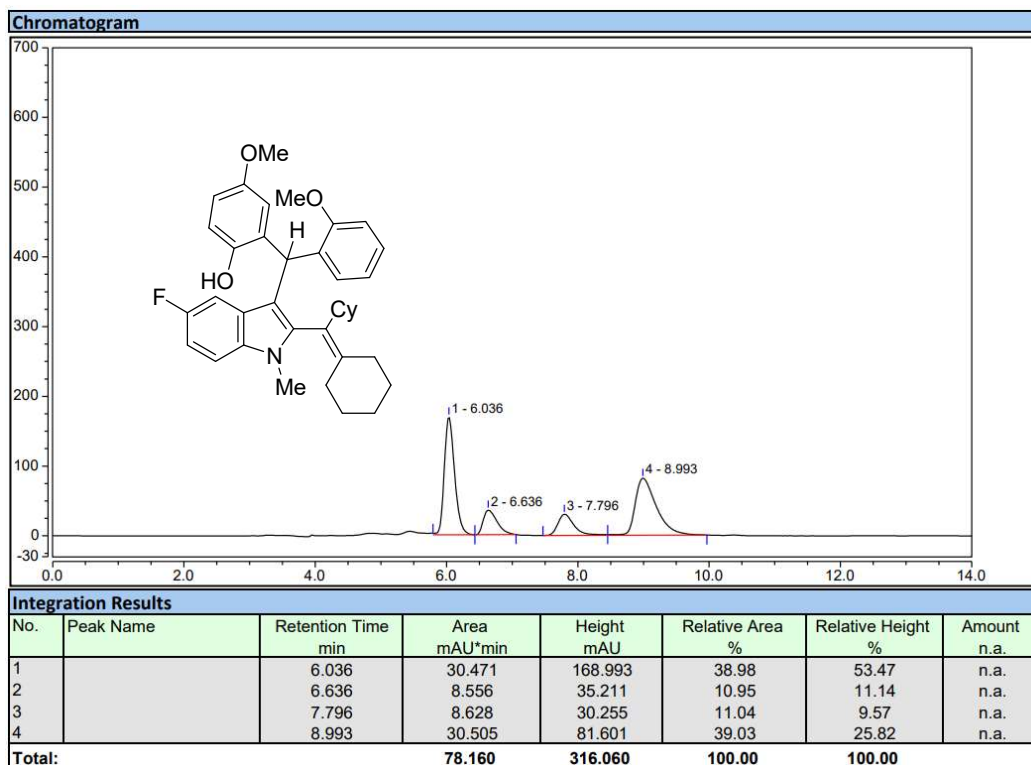

Enantioselective (inseparable diastereomers with 89:11 dr):

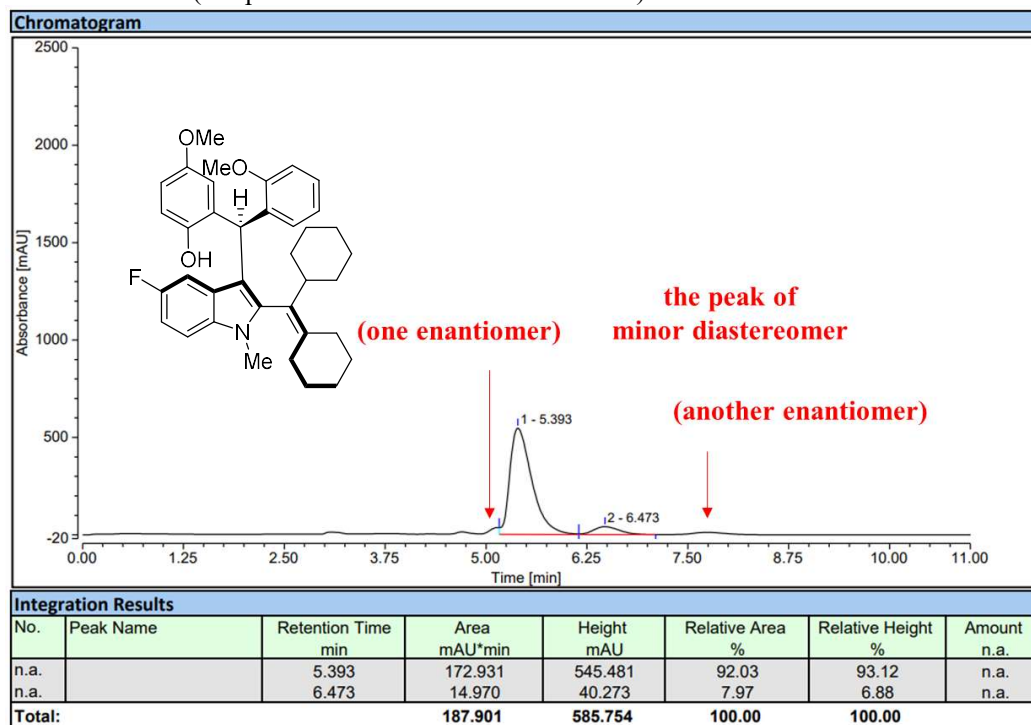

### 3bi

Racemic:

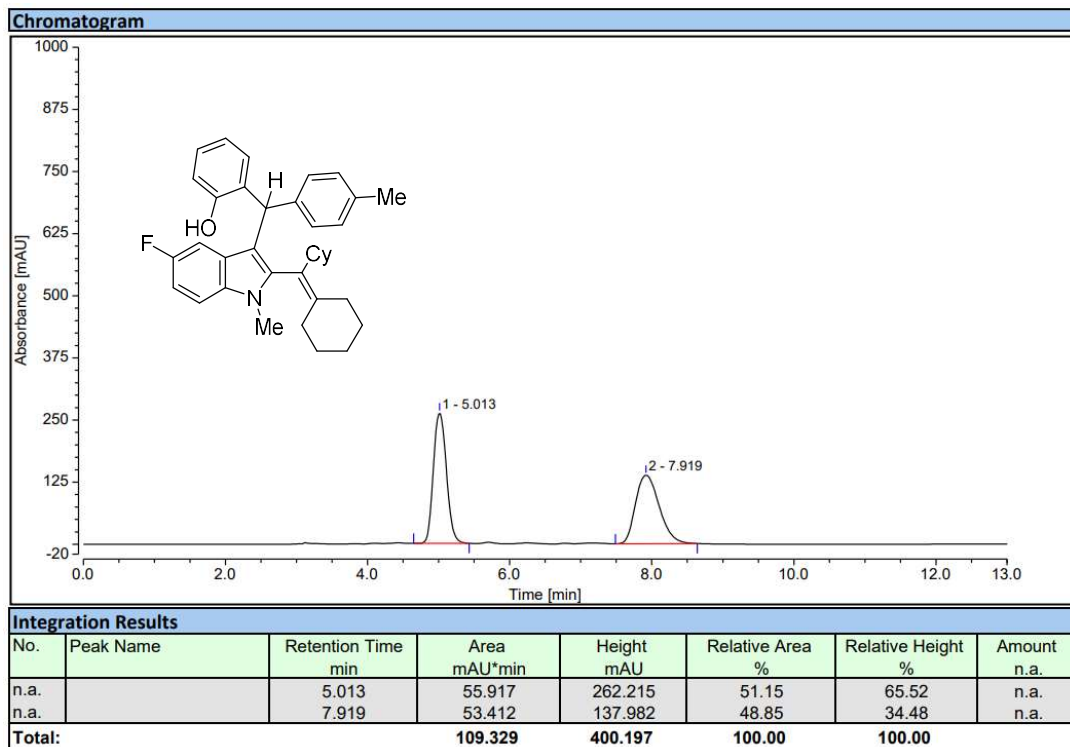

Enantioselective:

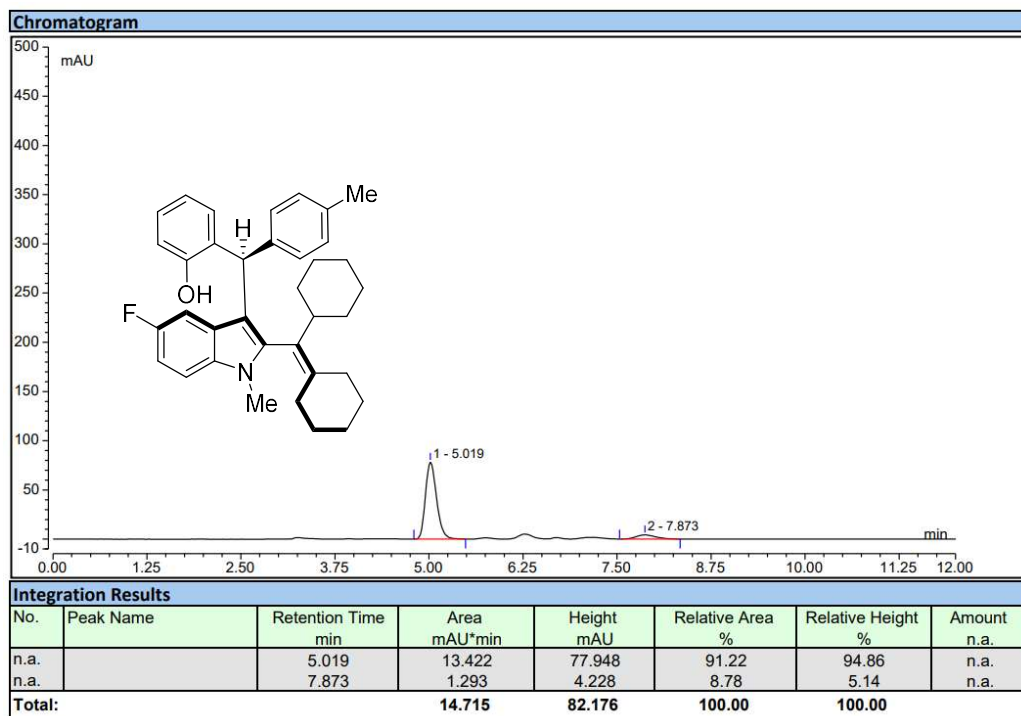

### 3ca

Racemic:

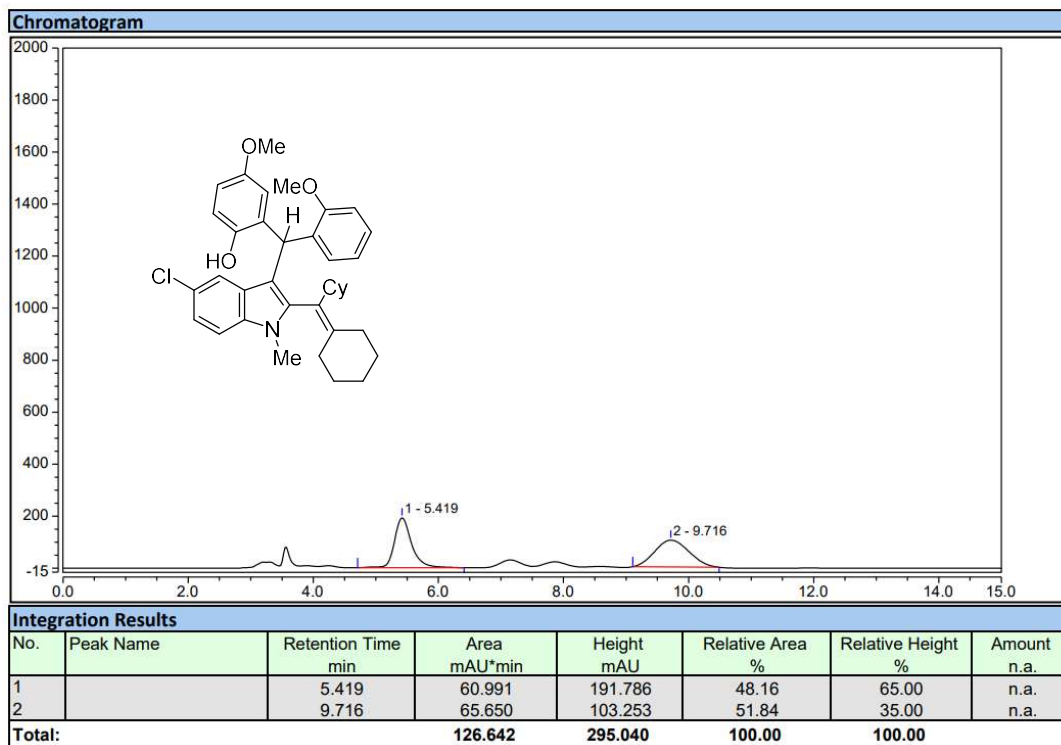

Enantioselective:

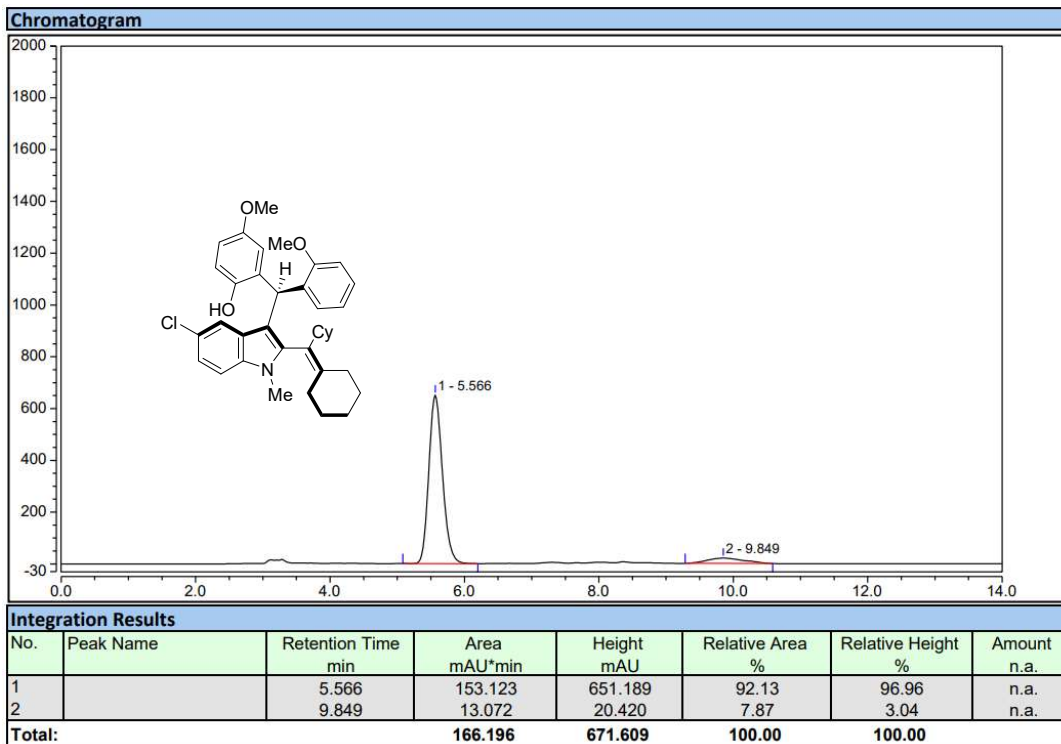

3cc

Racemic:

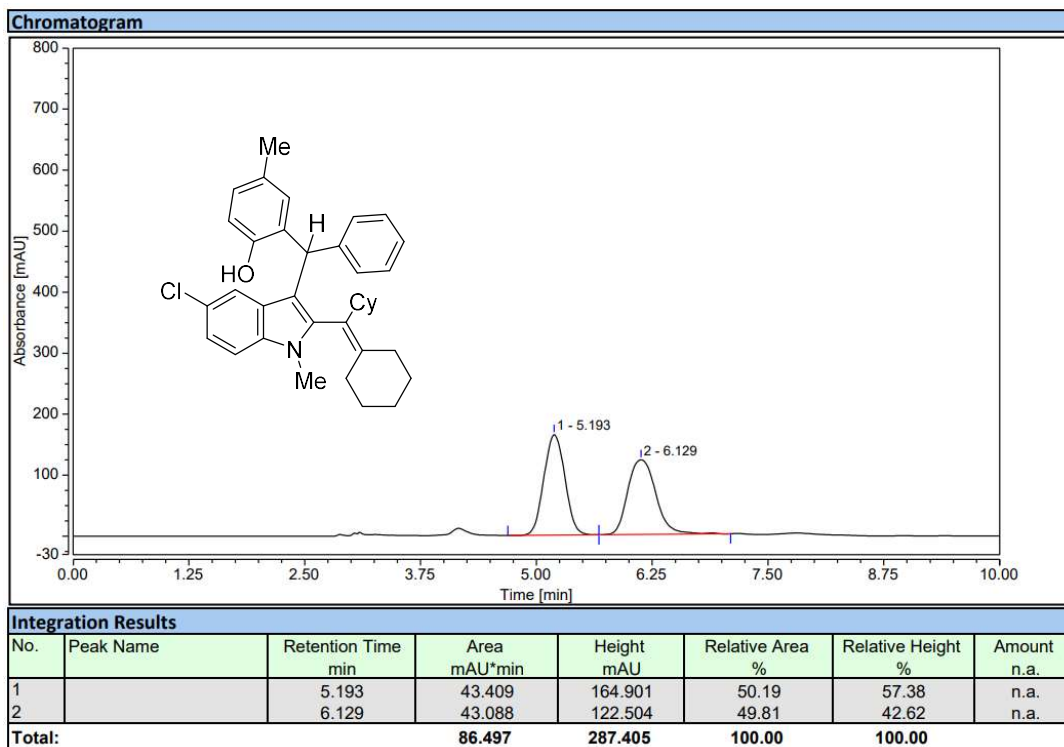

Enantioselective:

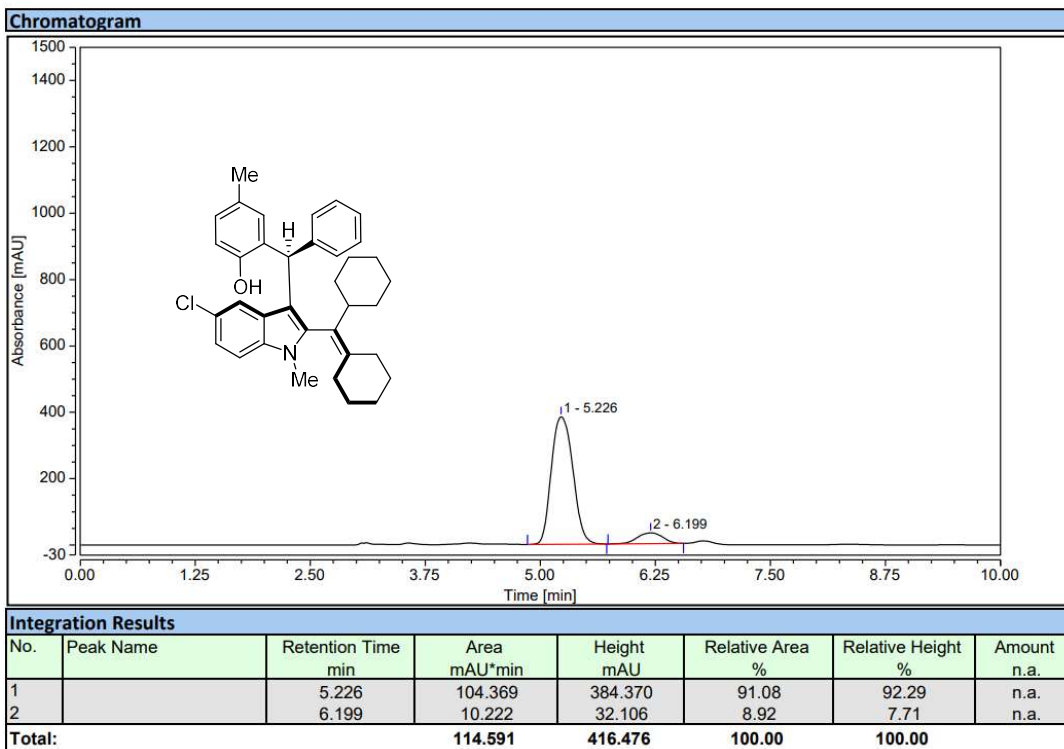



### 3da

Racemic:

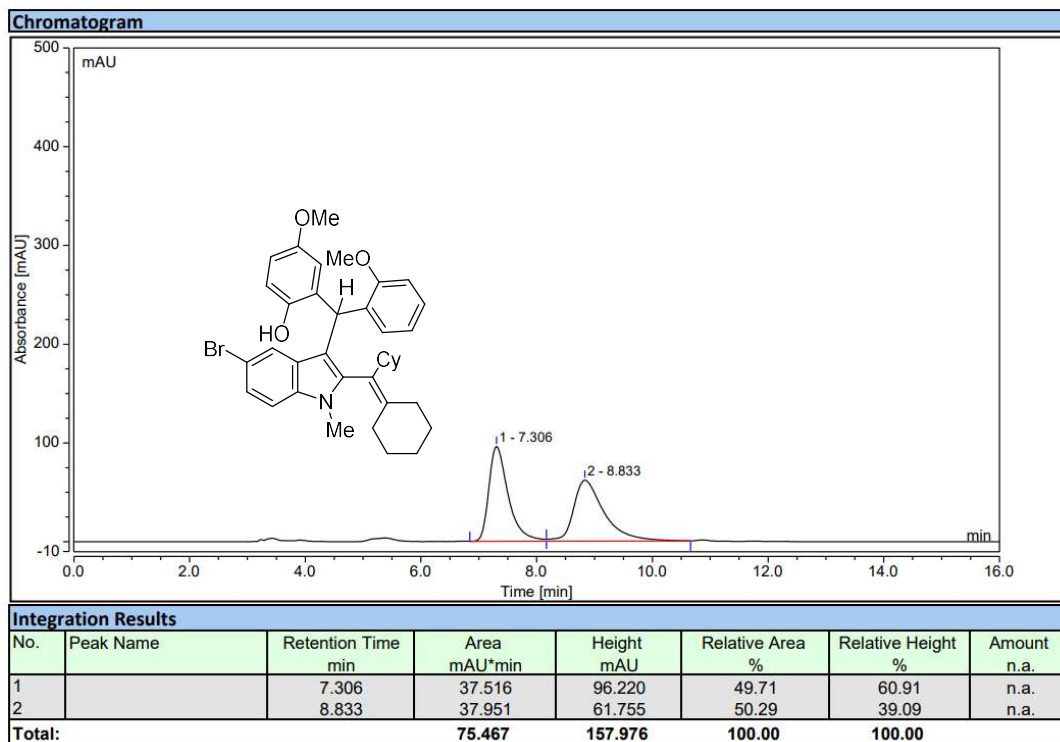

Enantioselective:

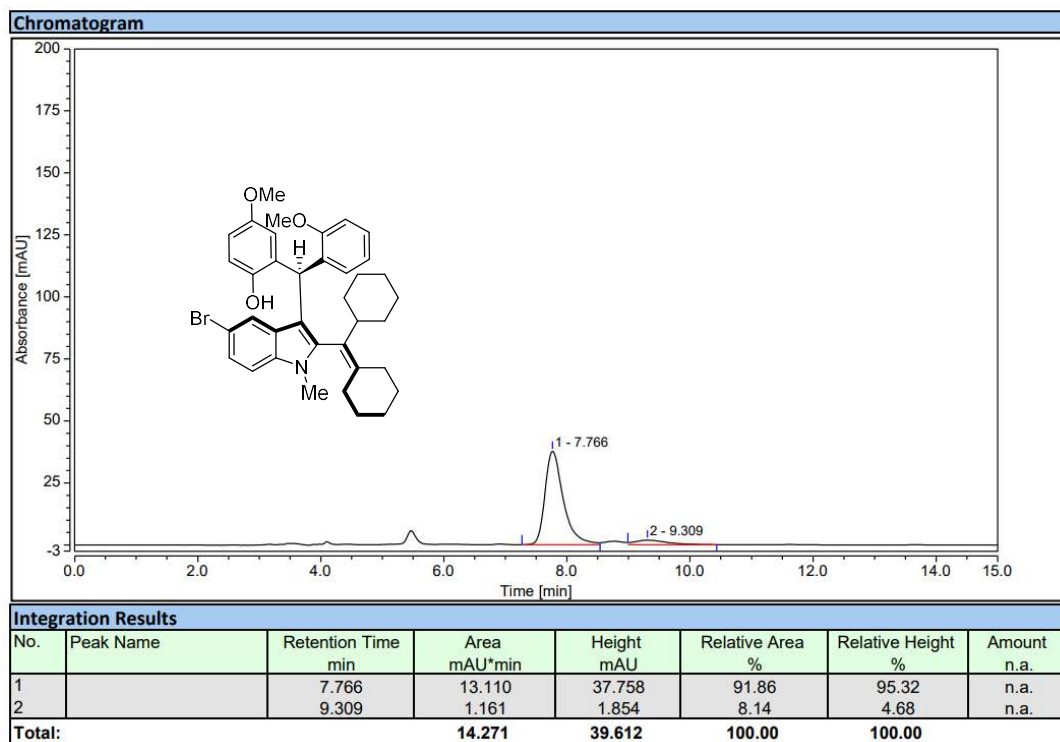

3ei

Racemic:

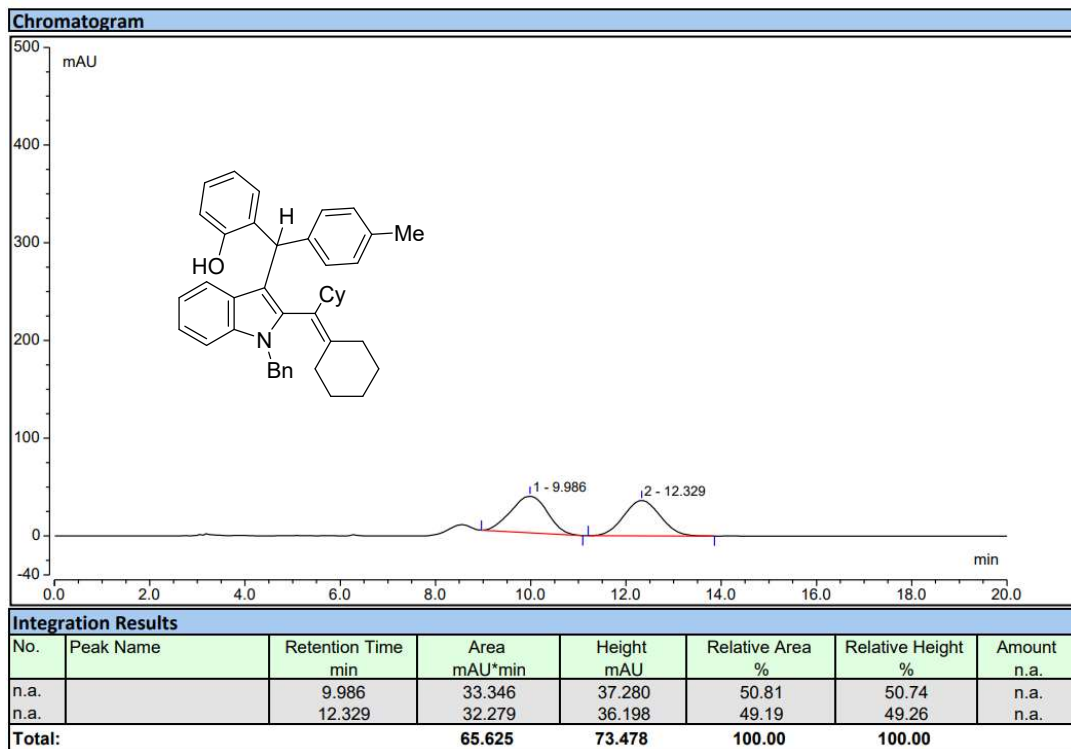

Enantioselective:

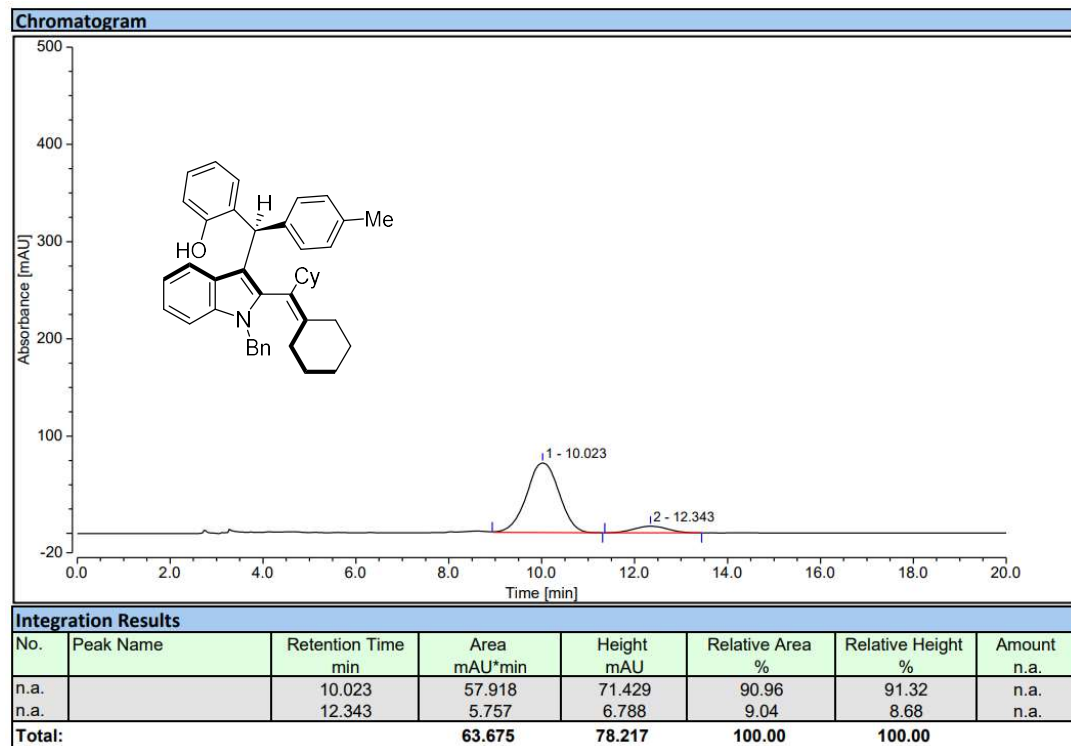

### 3fa

Racemic:

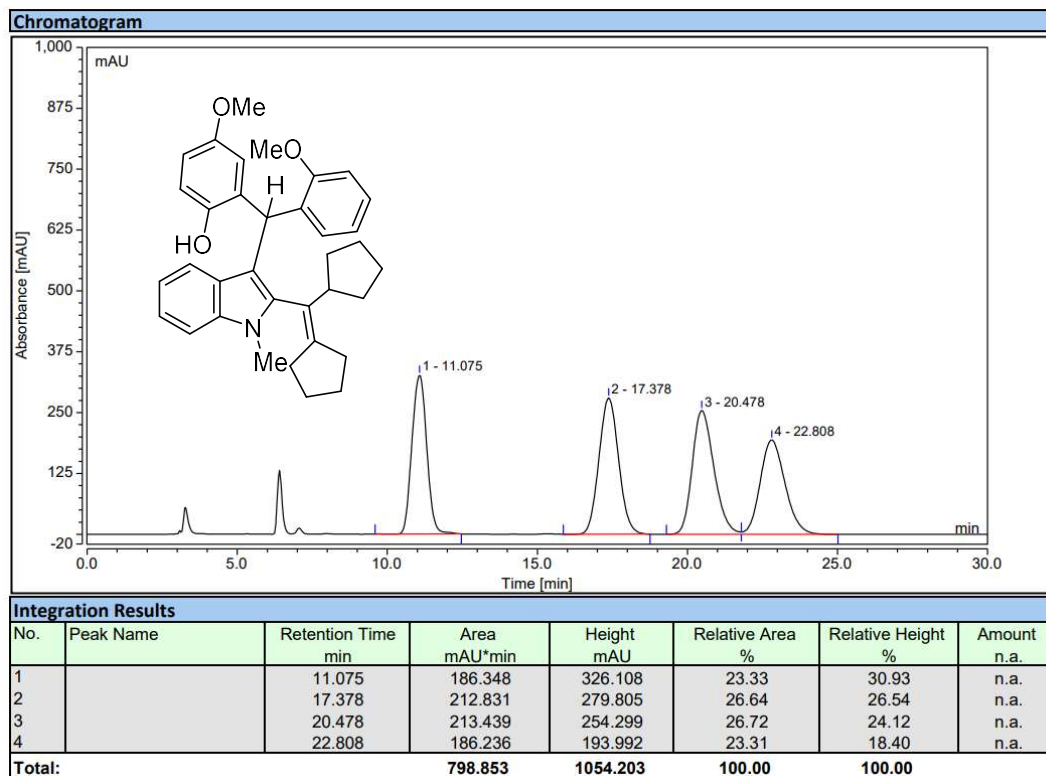

Enantioselective: (inseparable diastereomers with 85:15 dr):

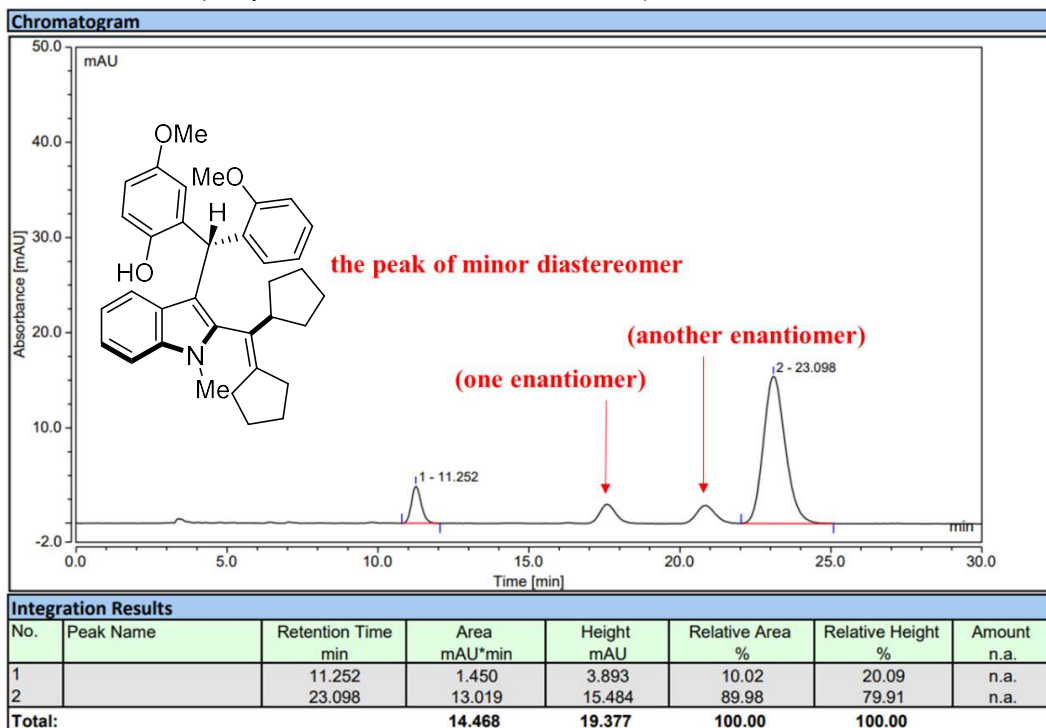

3ga

Racemic:

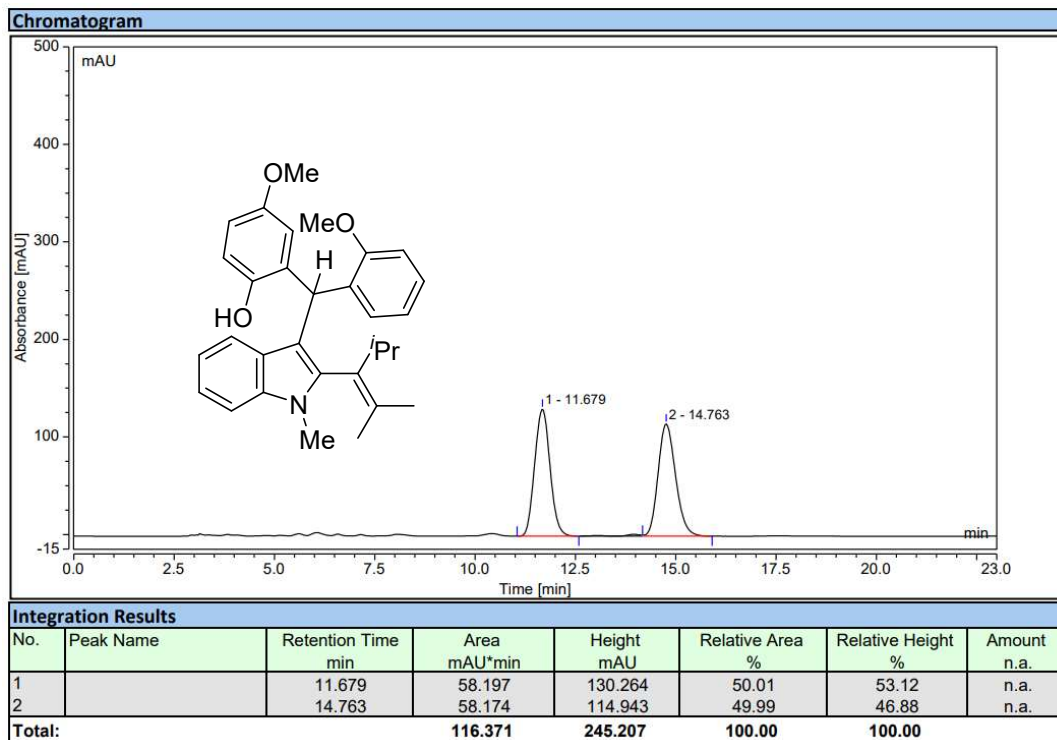

Enantioselective:

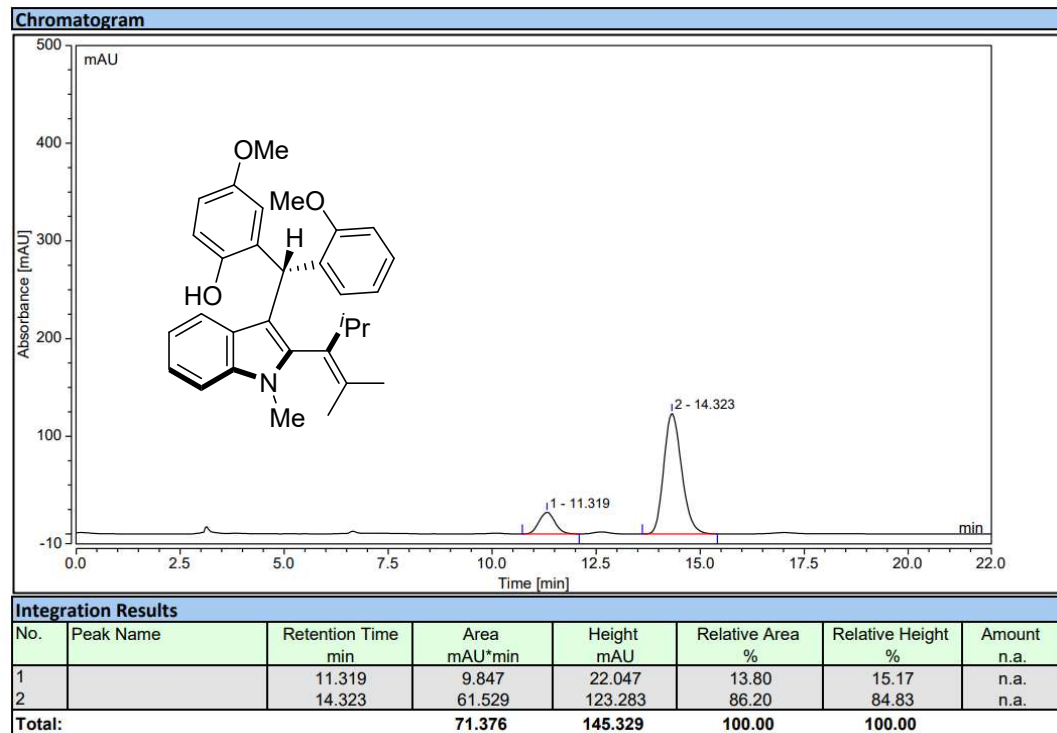

### 4aa

Racemic:

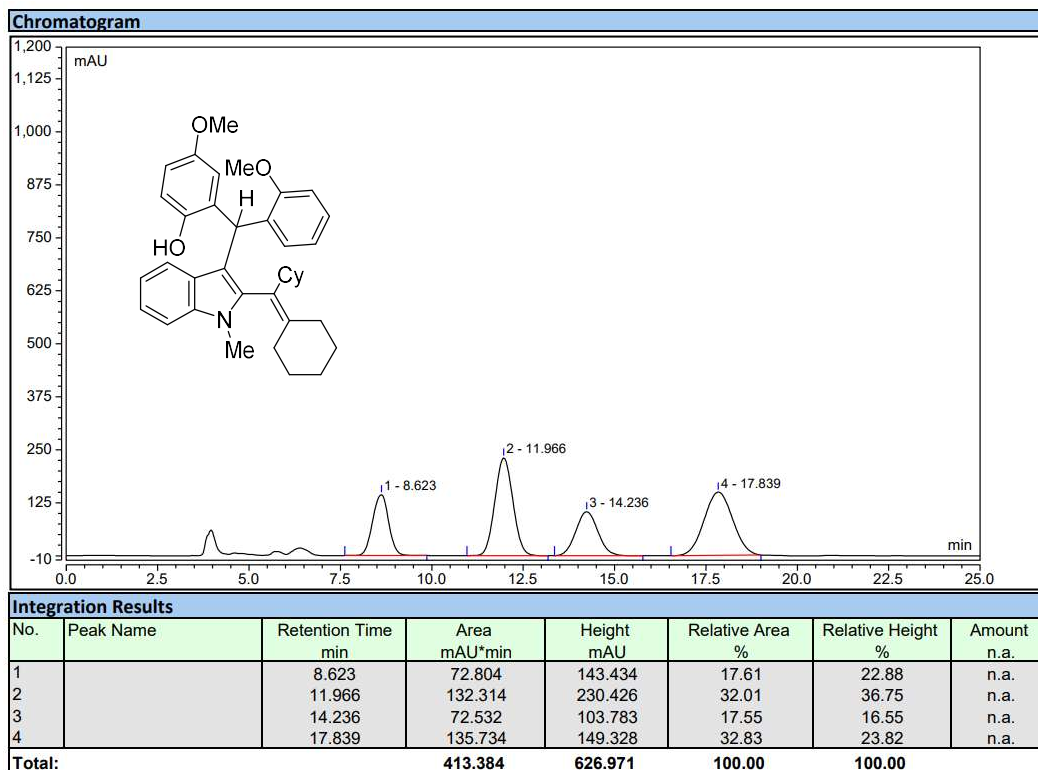

Enantioselective (inseparable diastereomers with 92:8 dr):

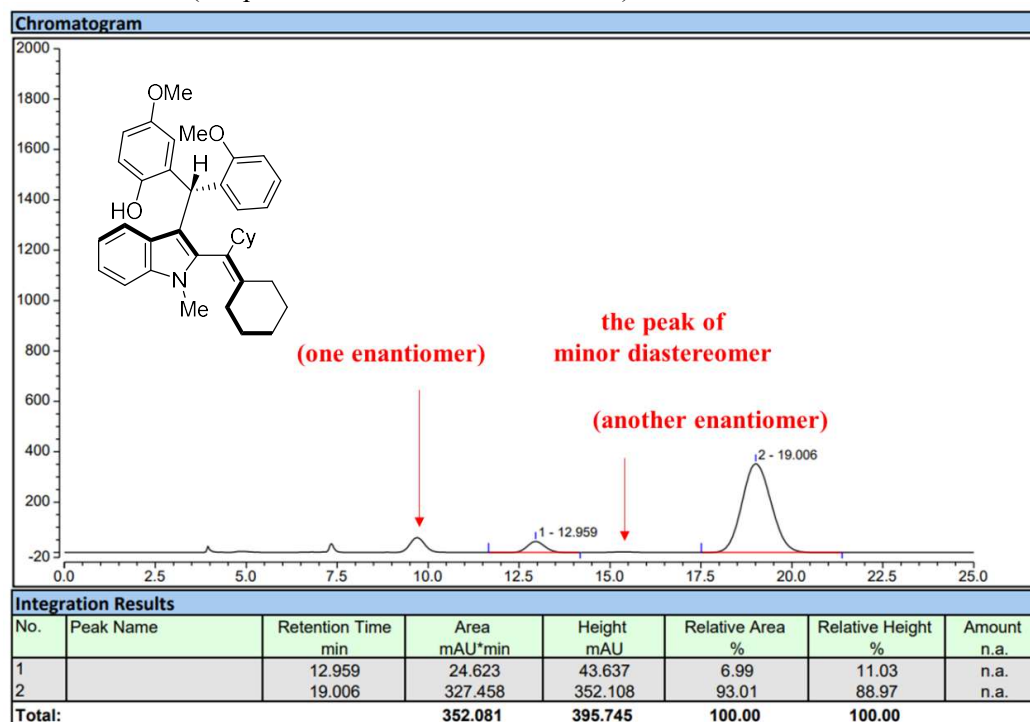

4ac

Racemic:

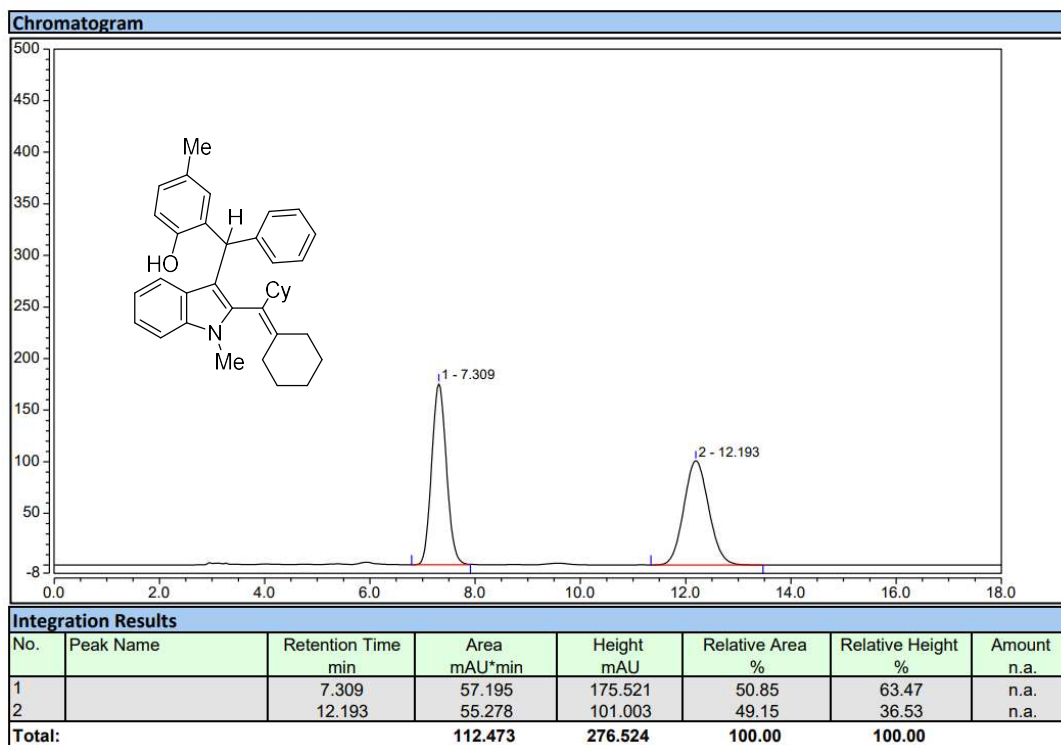

Enantioselective:

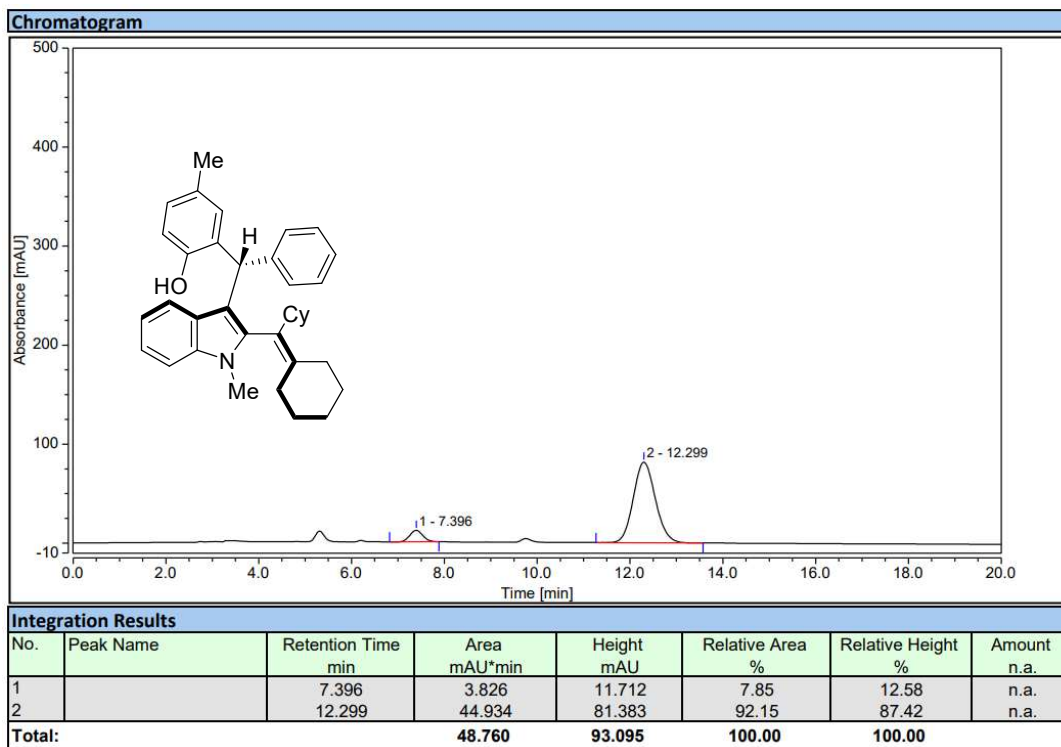

4a1

Racemic:

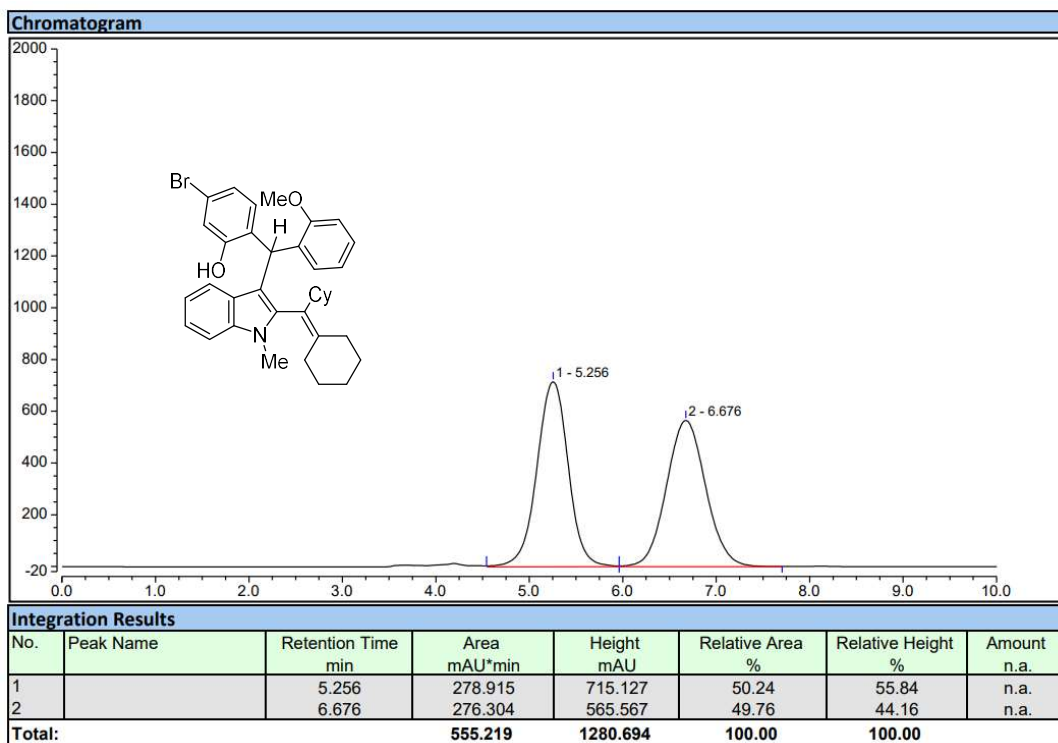

Enantioselective:

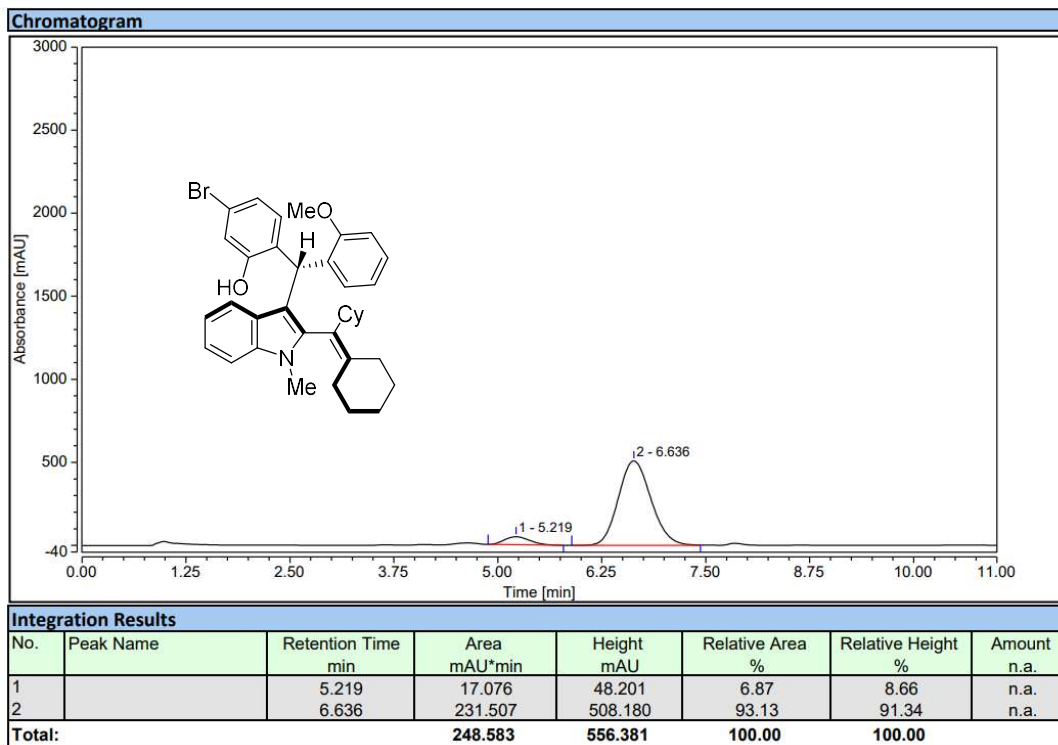

4ai

Racemic:

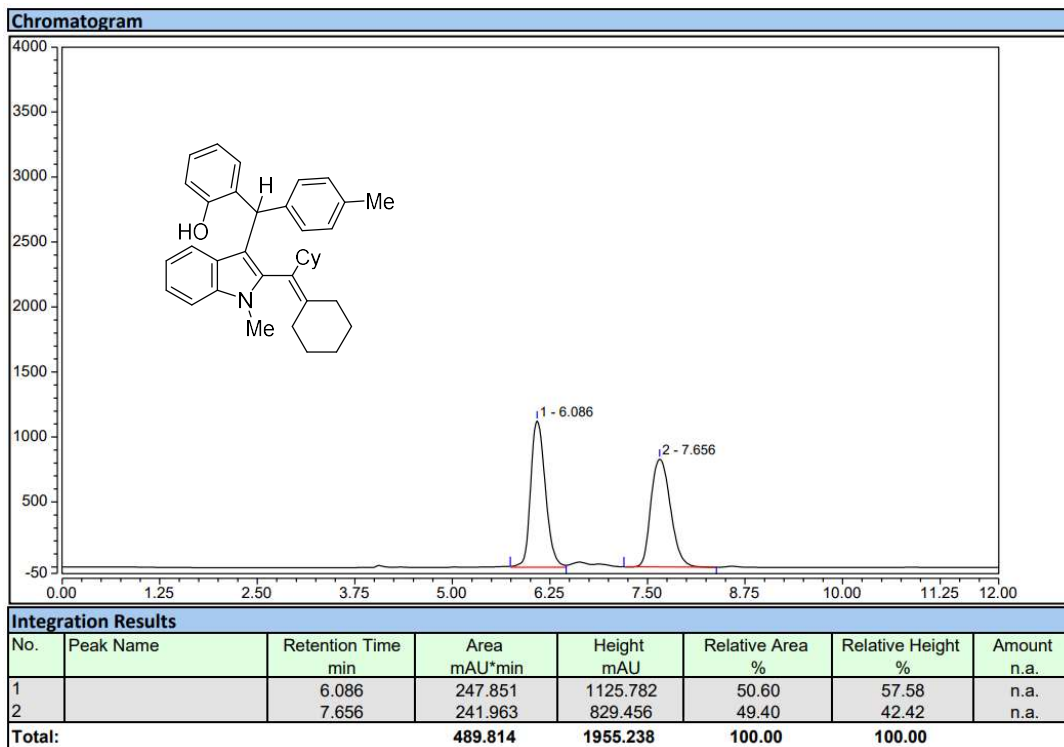

Enantioselective:

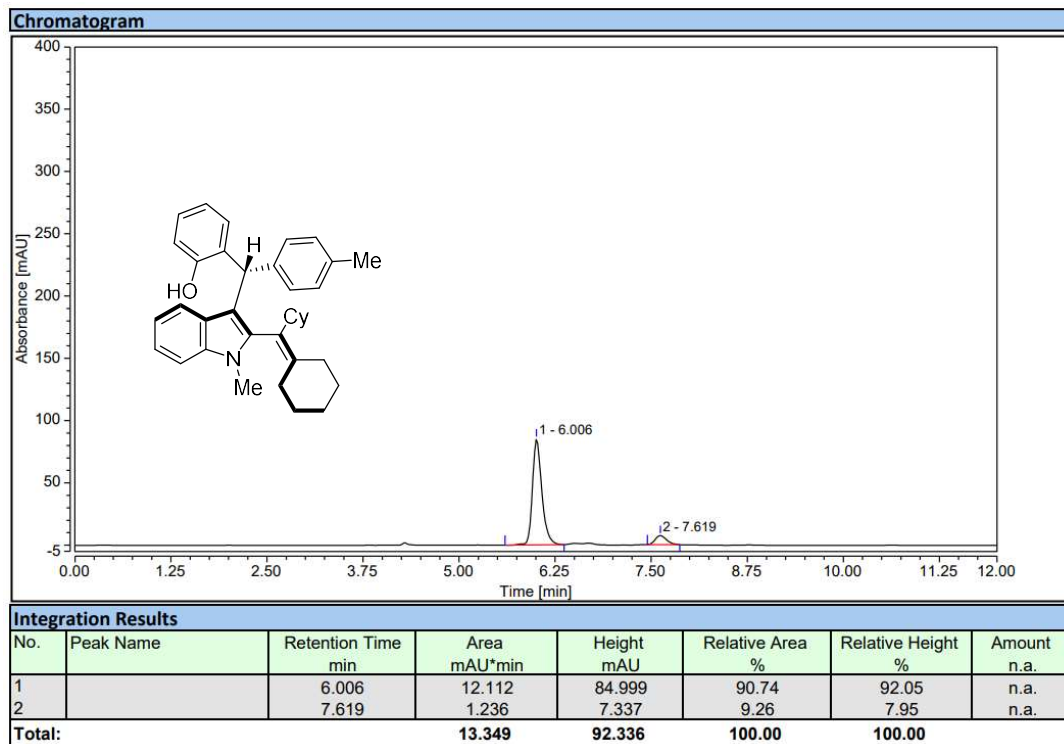



**4am**

Racemic:

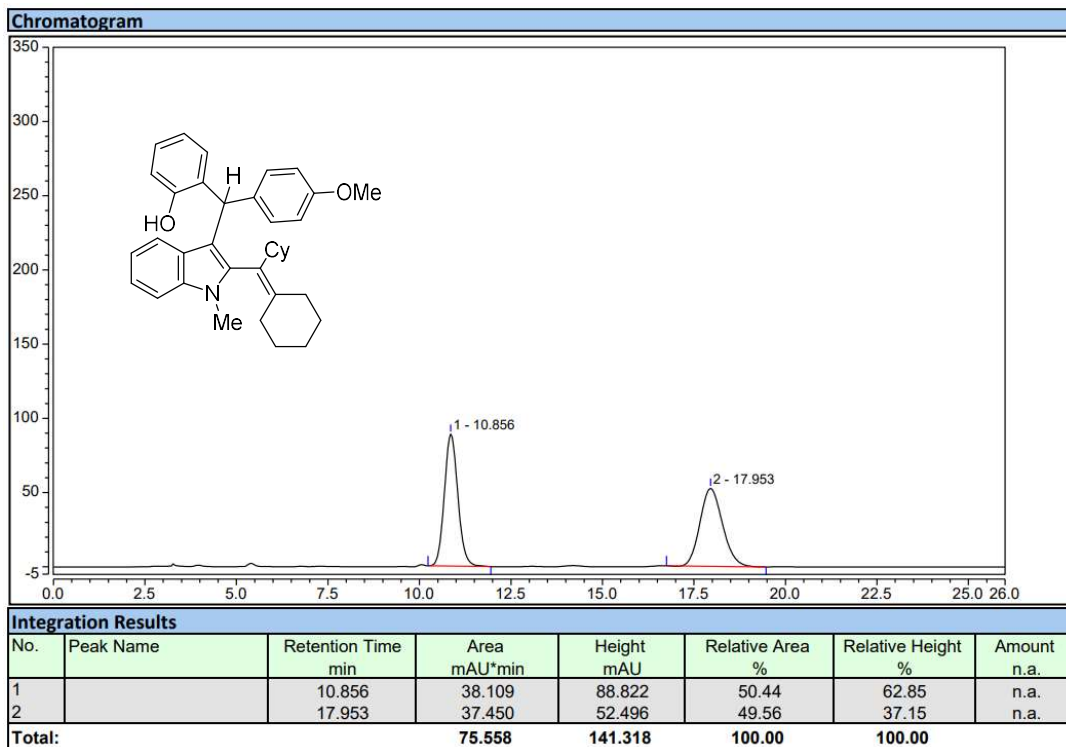

Enantioselective:

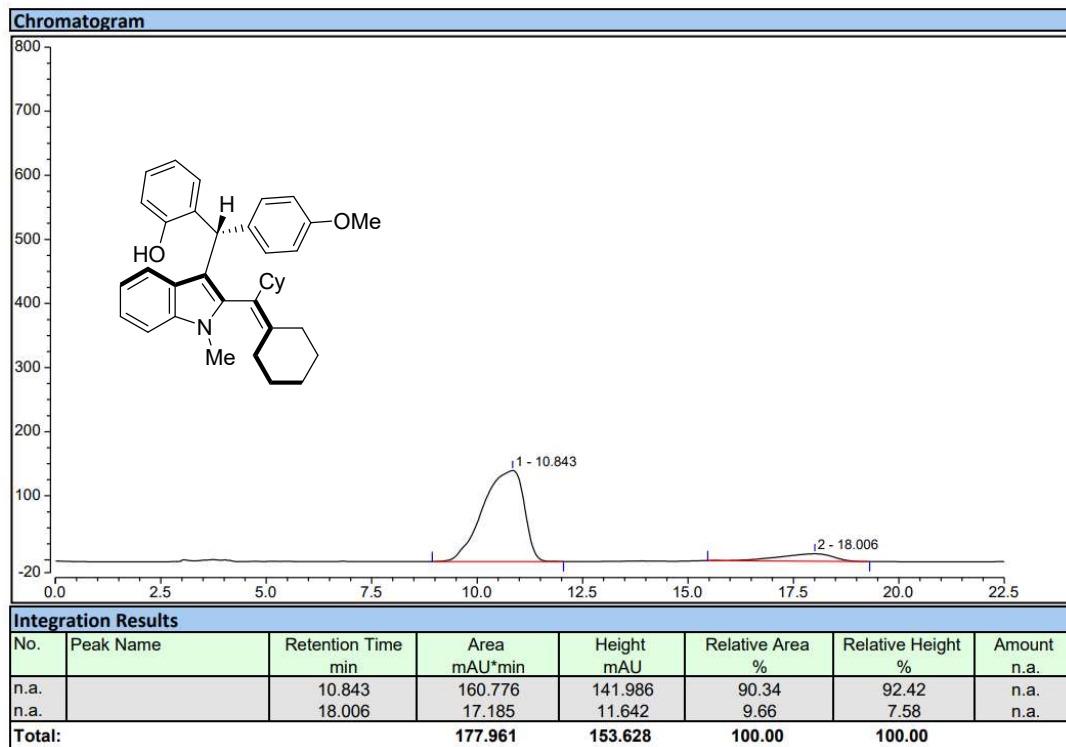

4aj

Racemic:

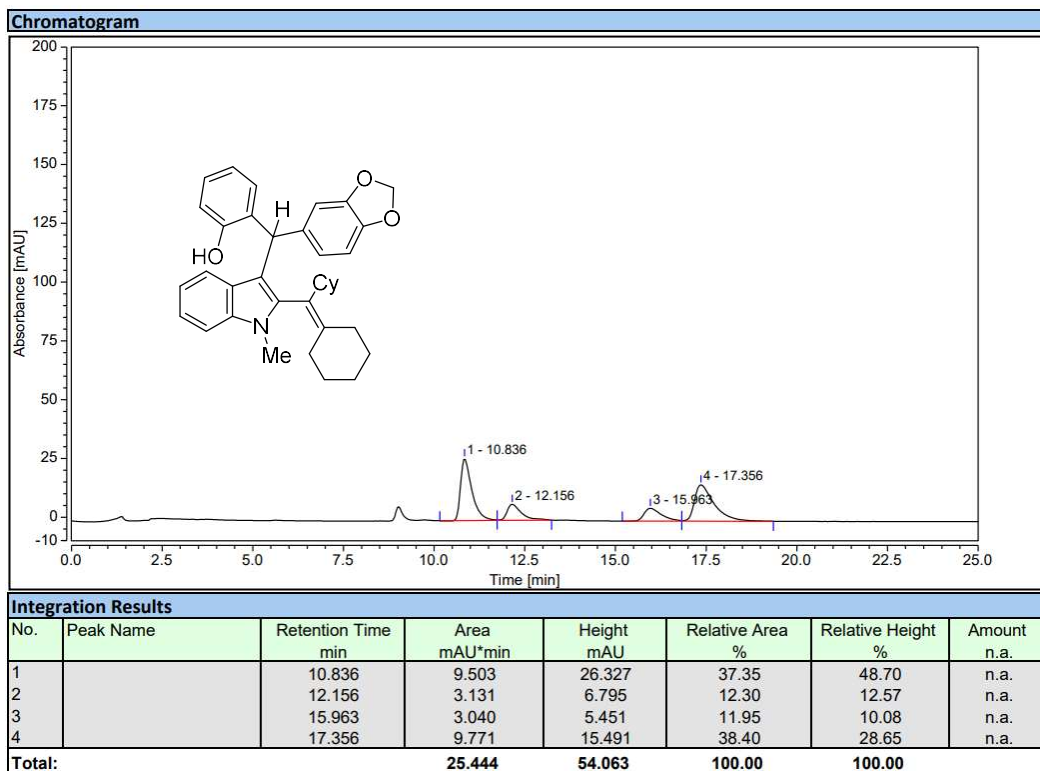

Enantioselective (inseparable diastereomers with >95:5 dr):

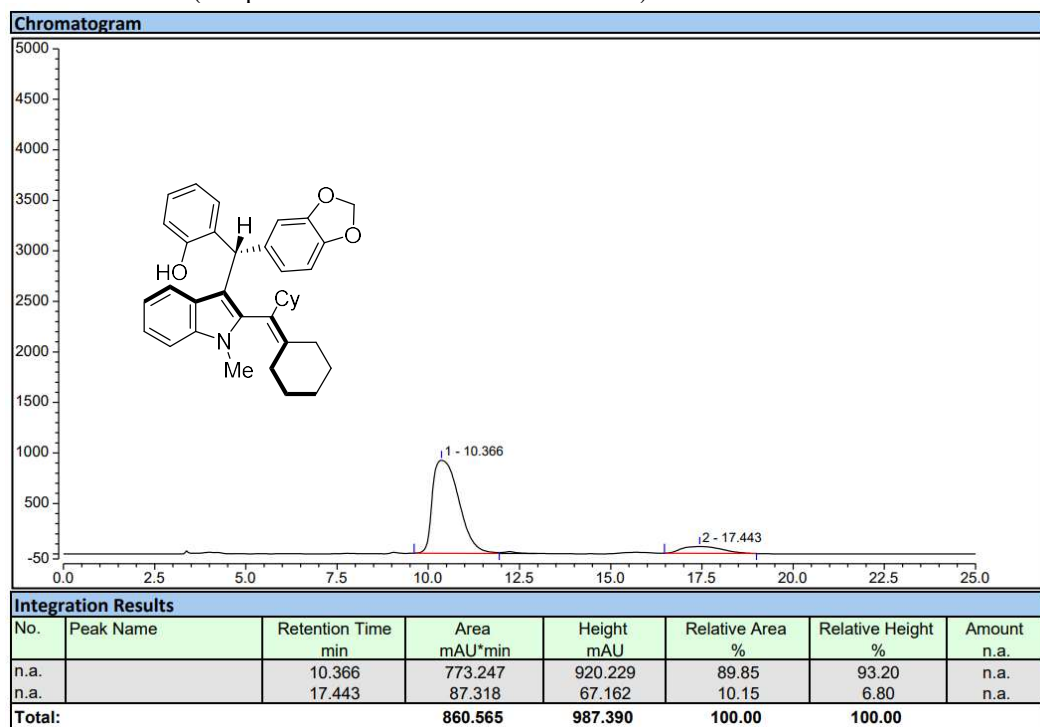

4ak

Racemic:

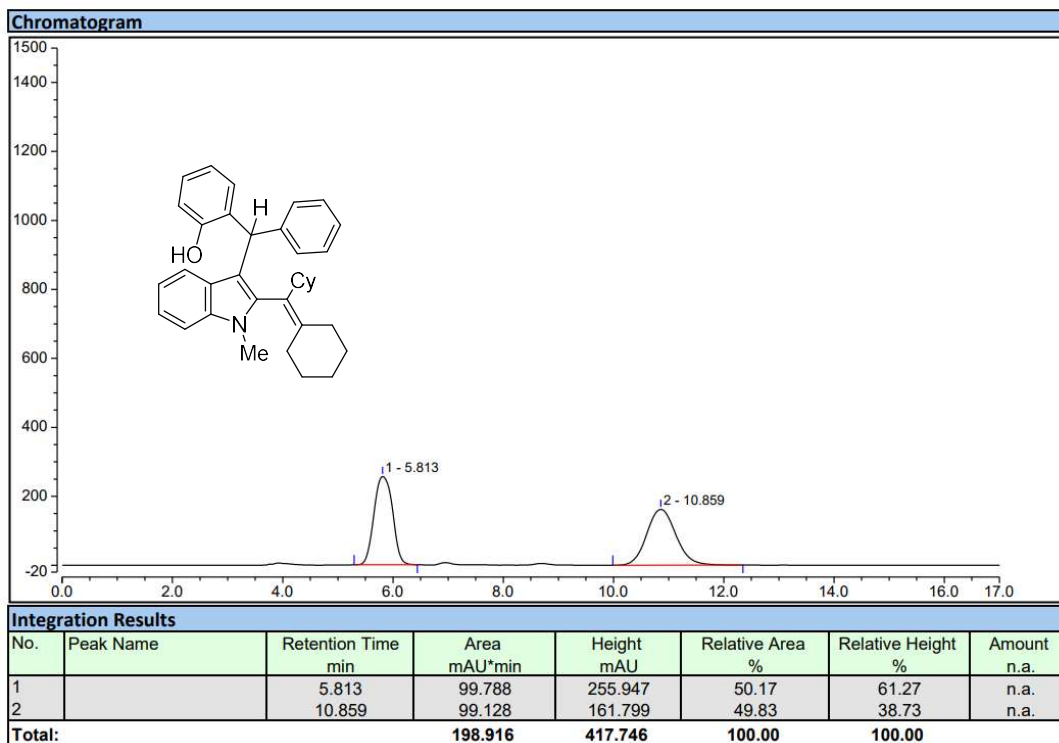

Enantioselective:

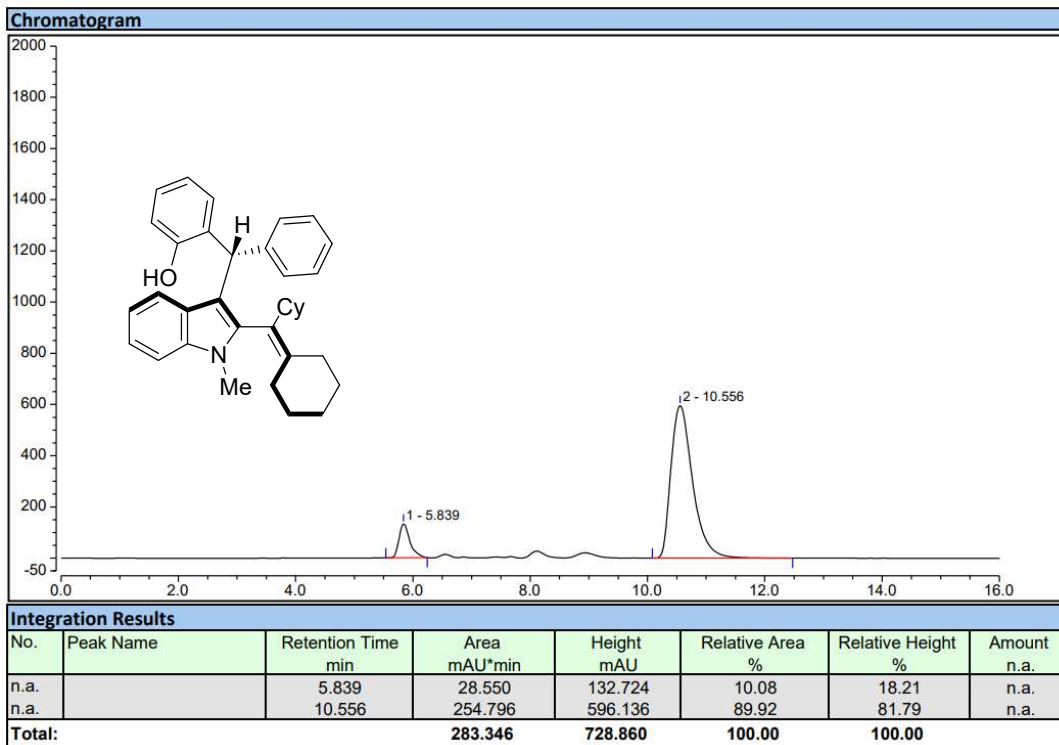

4af

Racemic:

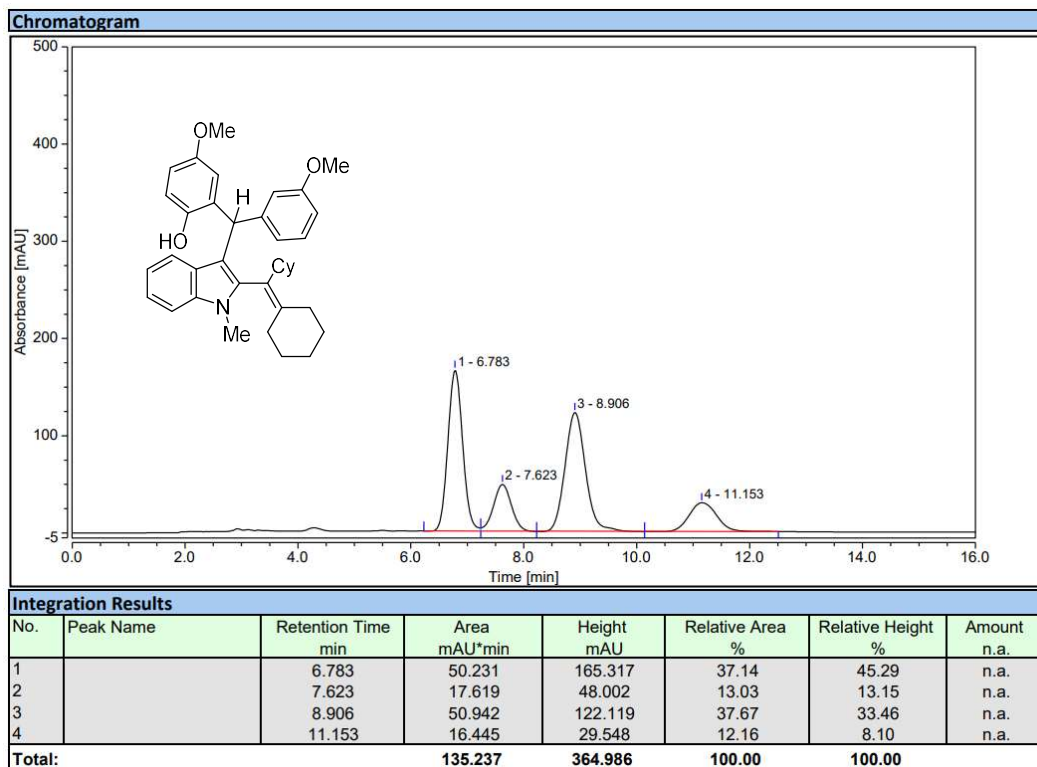

Enantioselective (inseparable diastereomers with 86:14 dr):

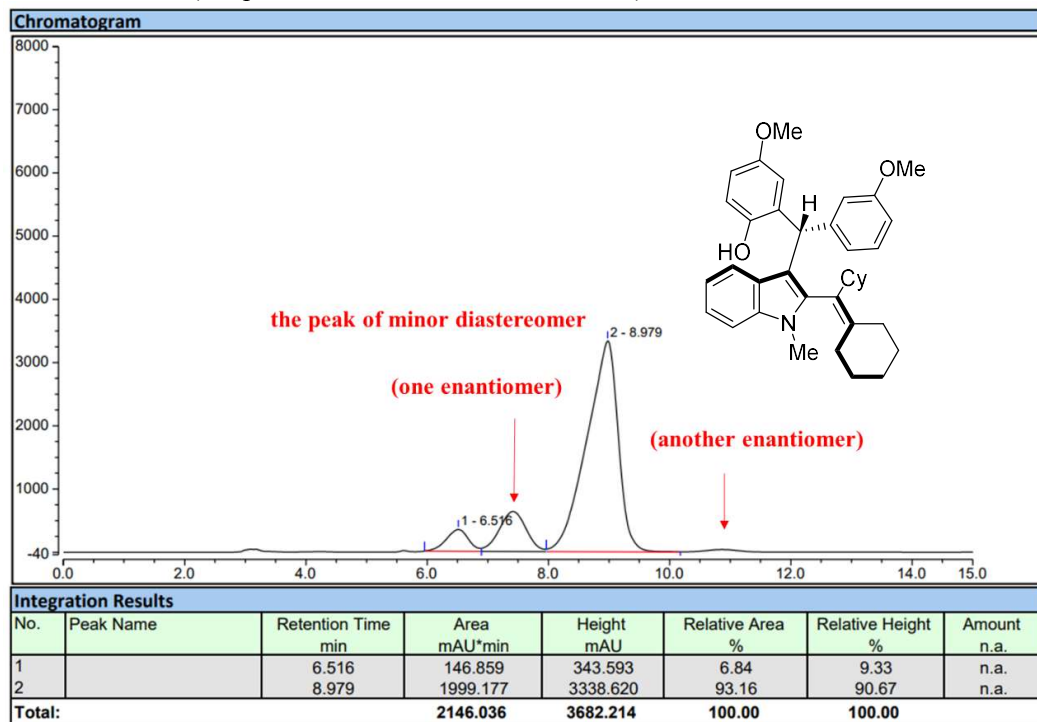

#### 4ah

Racemic:

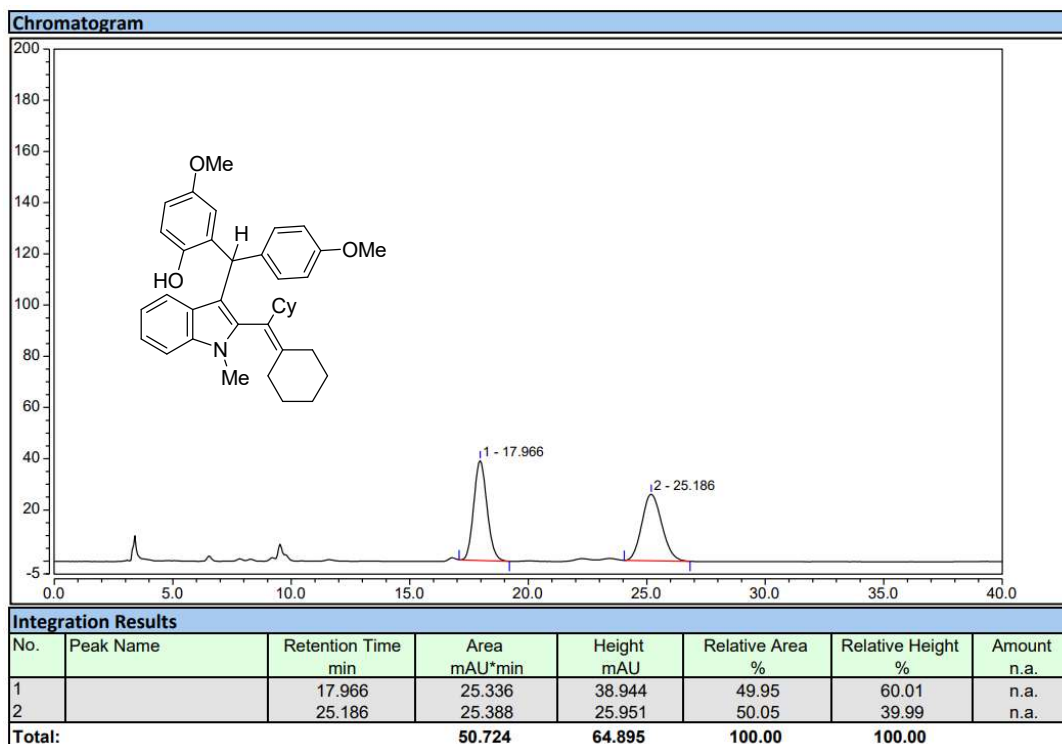

Enantioselective:

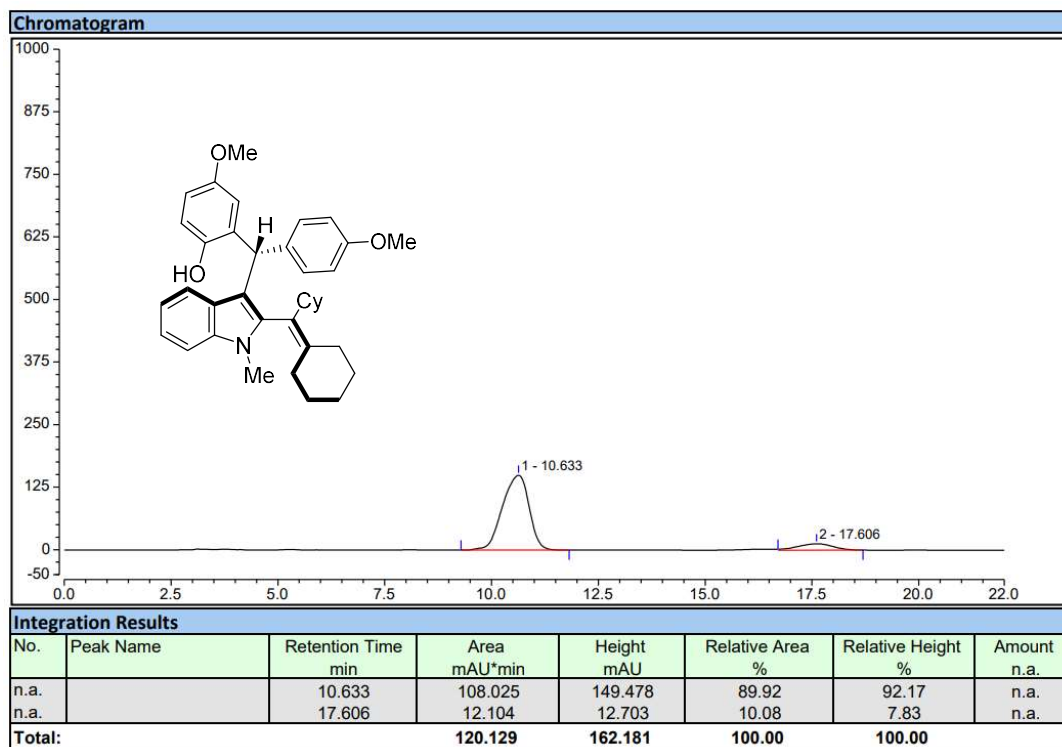

**4ba**

Racemic:

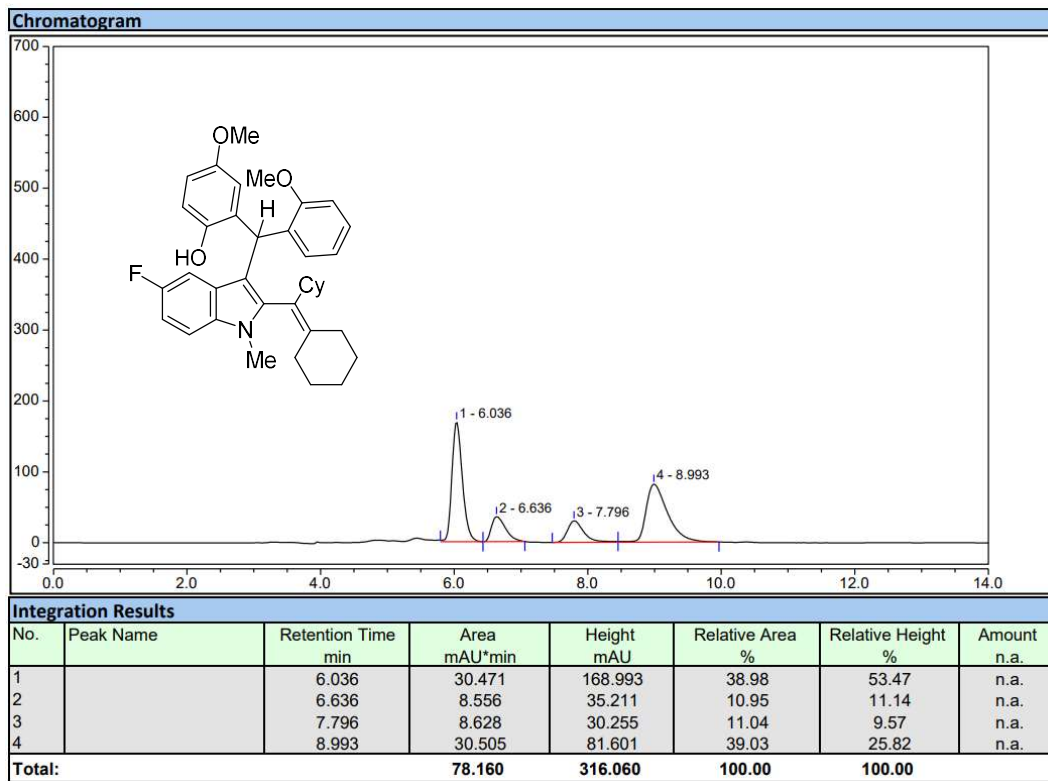

Enantioselective (inseparable diastereomers with >95:5 dr):

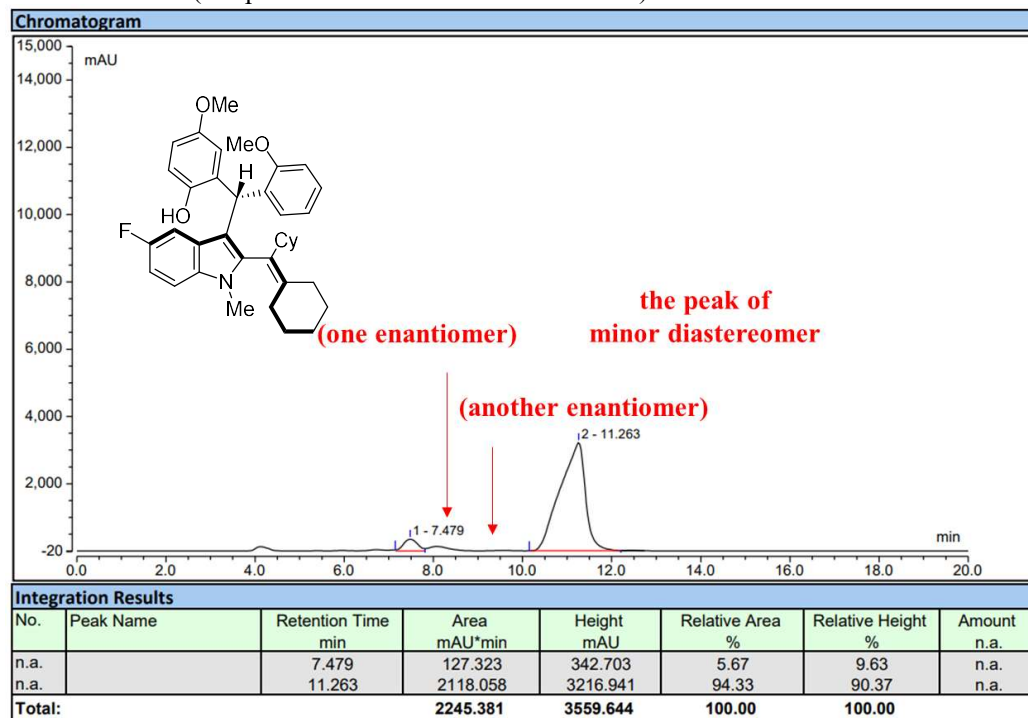

4ca

Racemic:

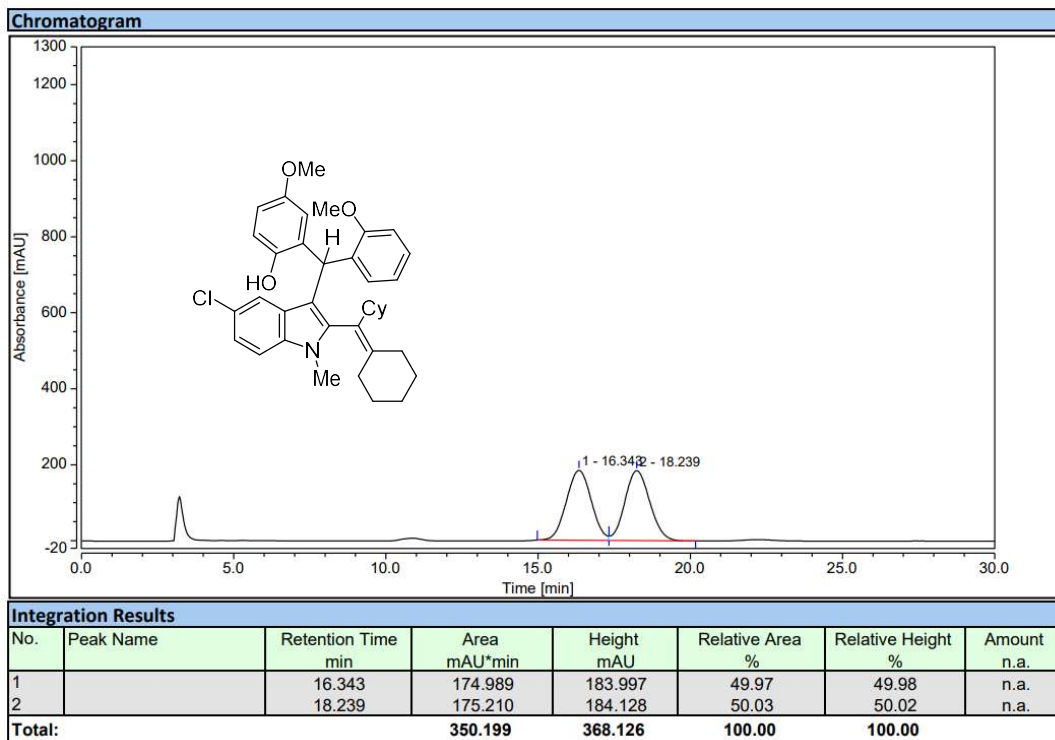

Enantioselective:

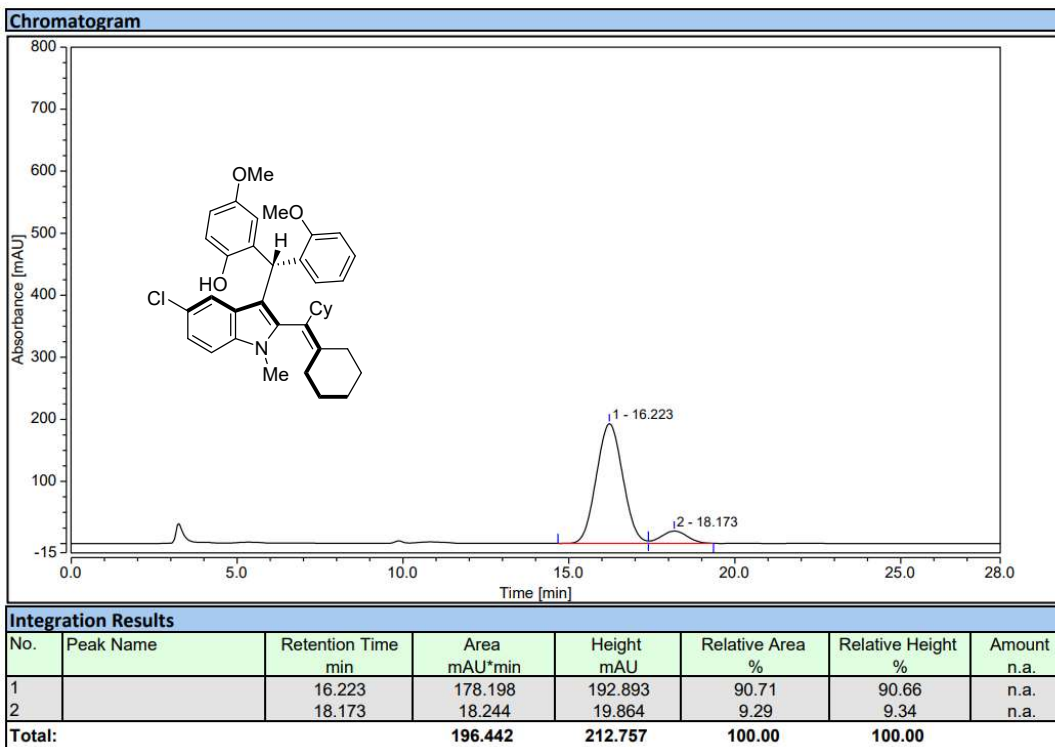

4ci

Racemic:

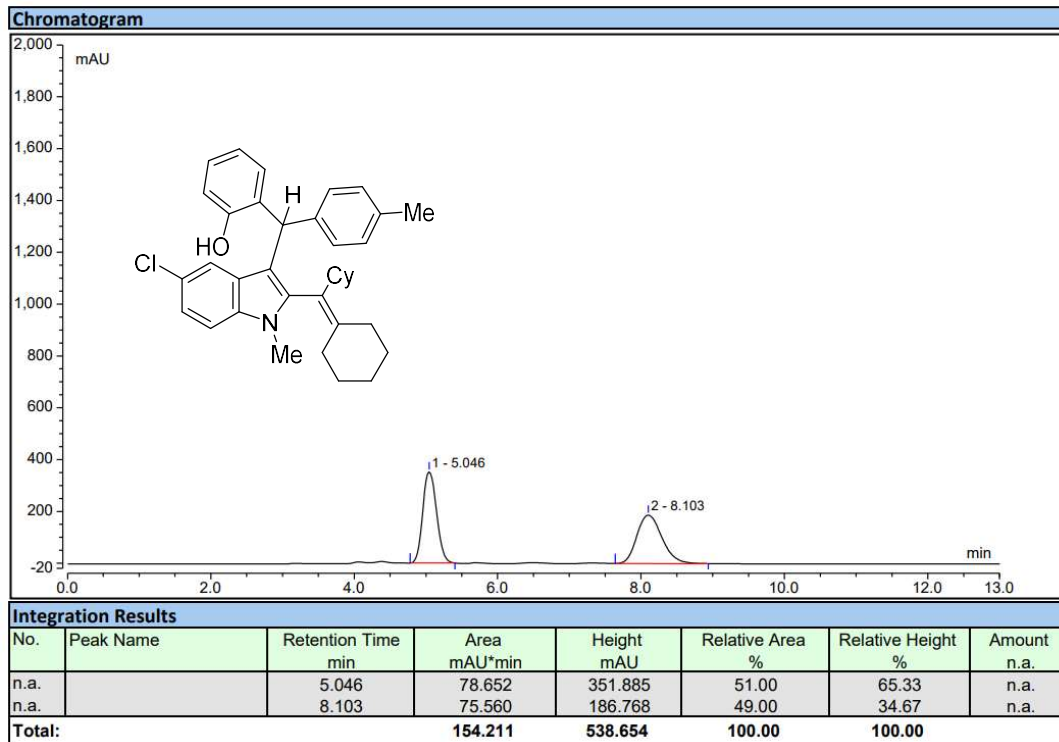

Enantioselective:

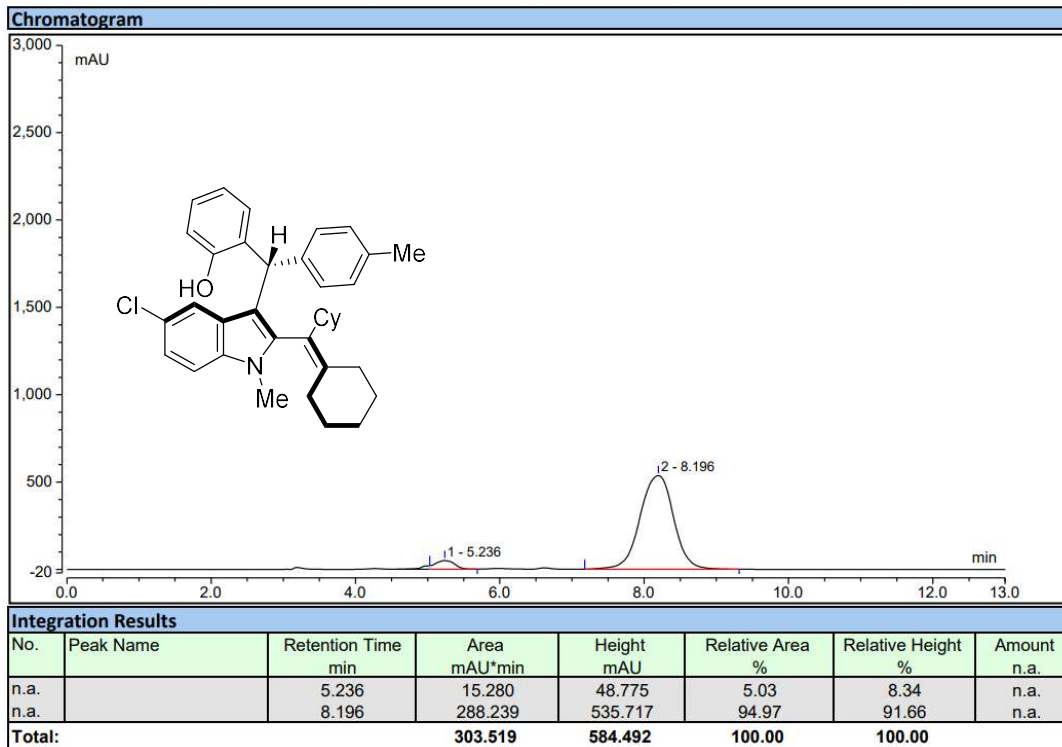



4da

Racemic:

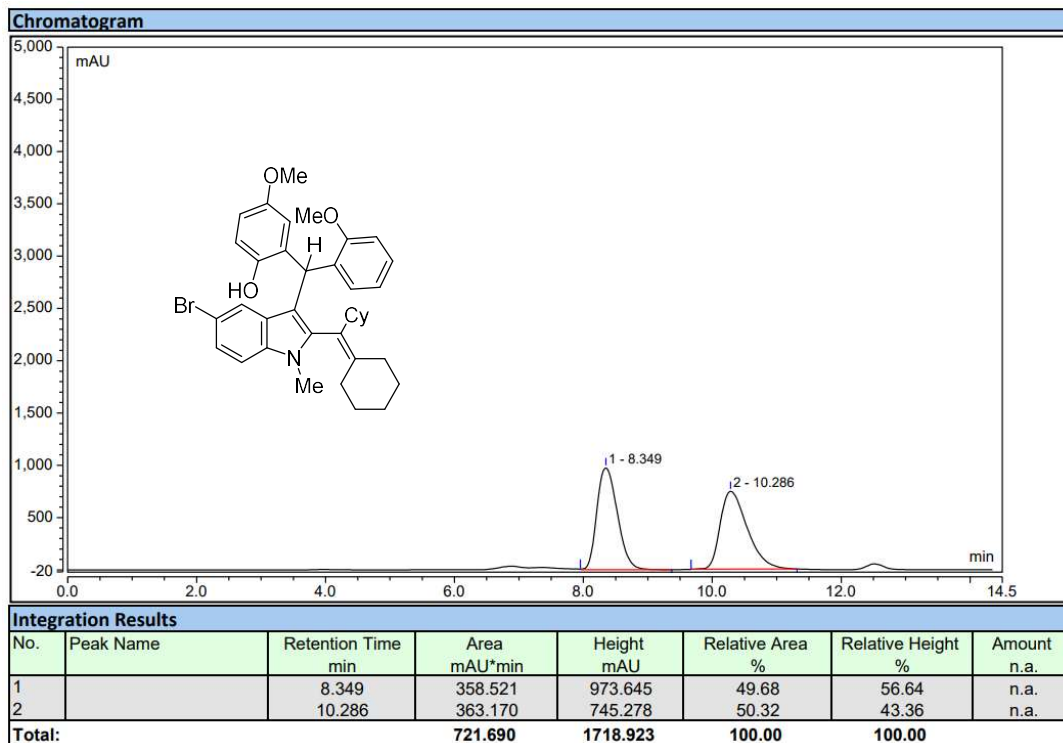

Enantioselective:

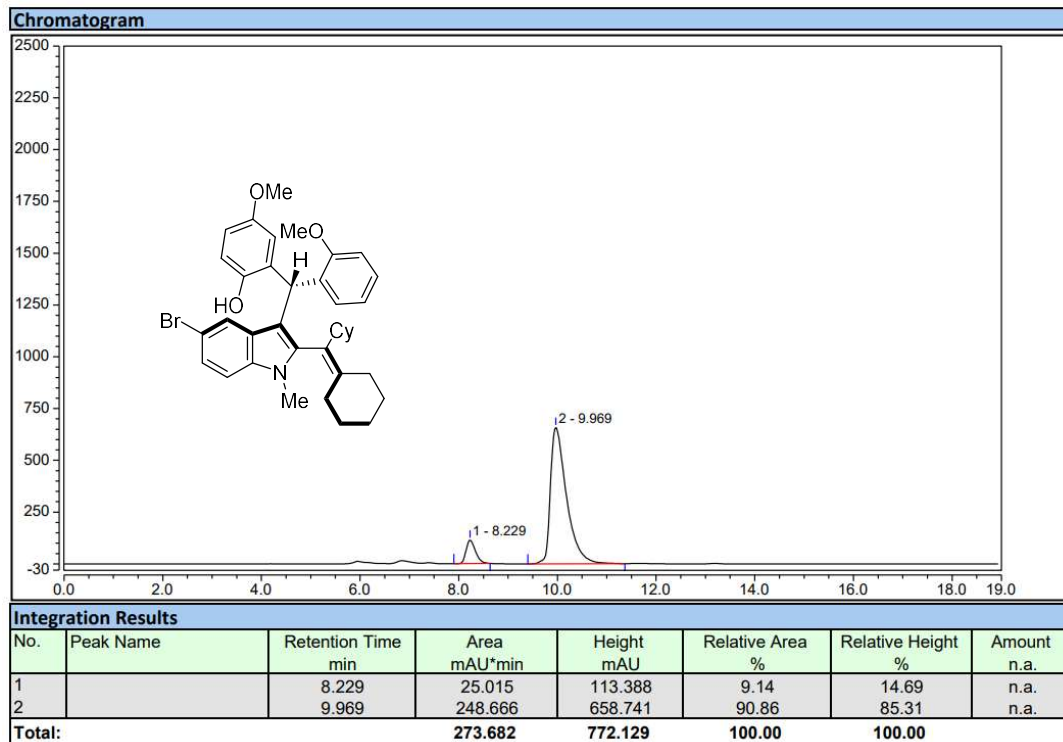

4di

Racemic:

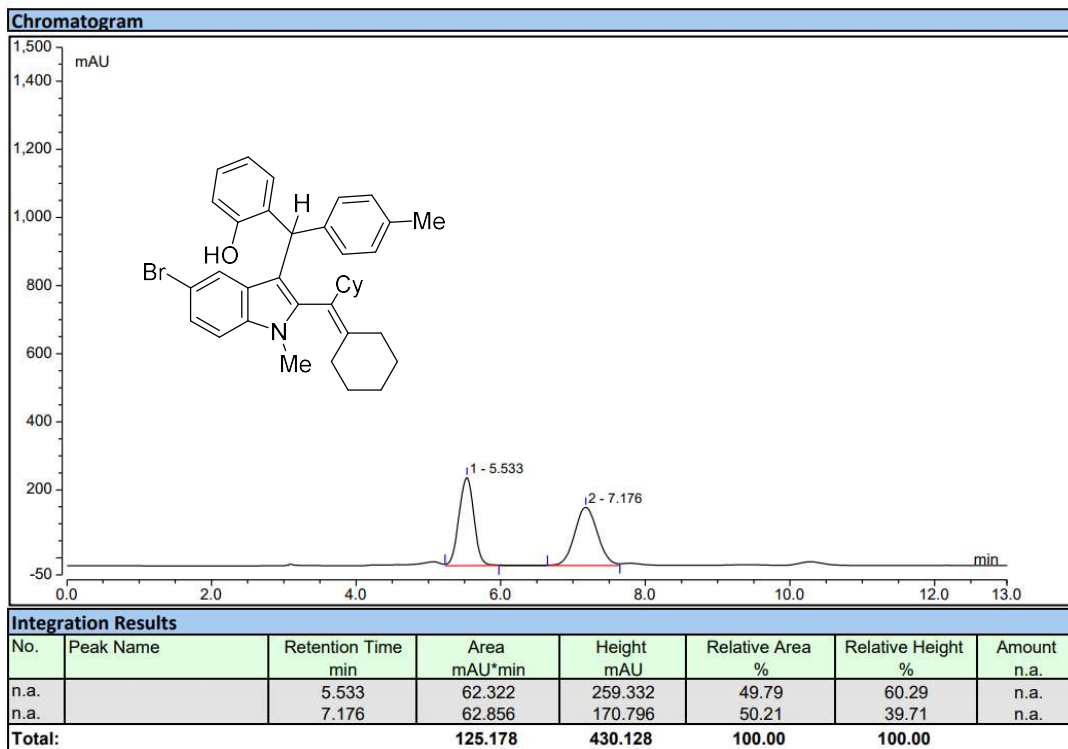

Enantioselective:

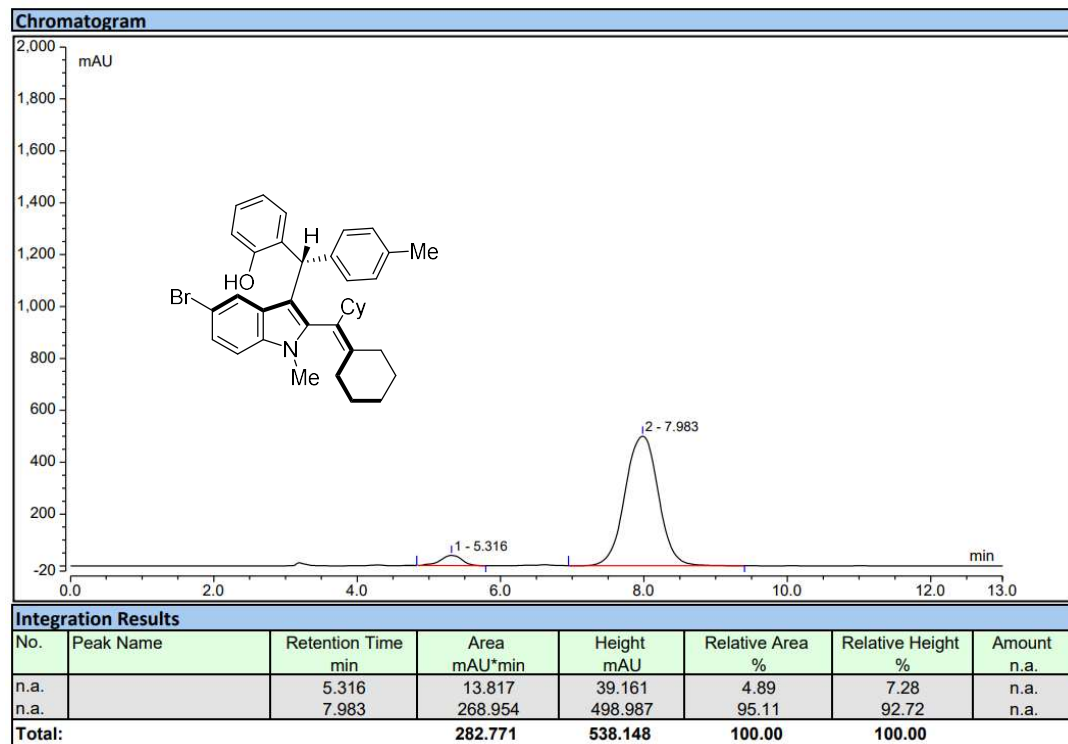

4ha

Racemic:

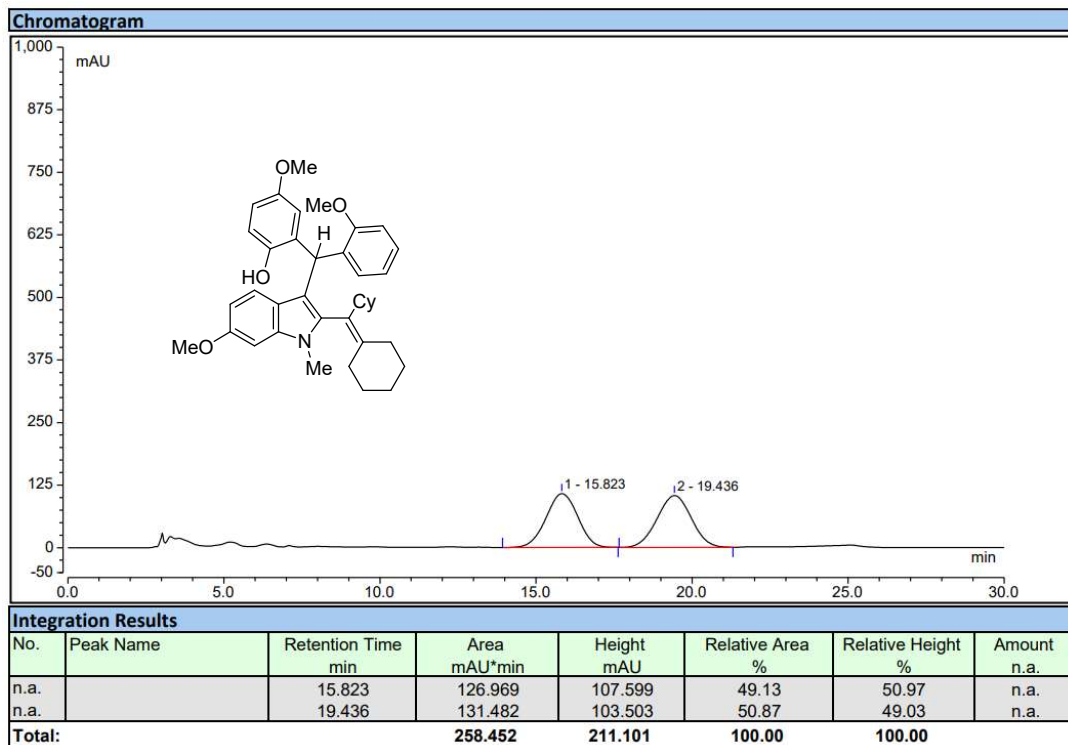

Enantioselective:

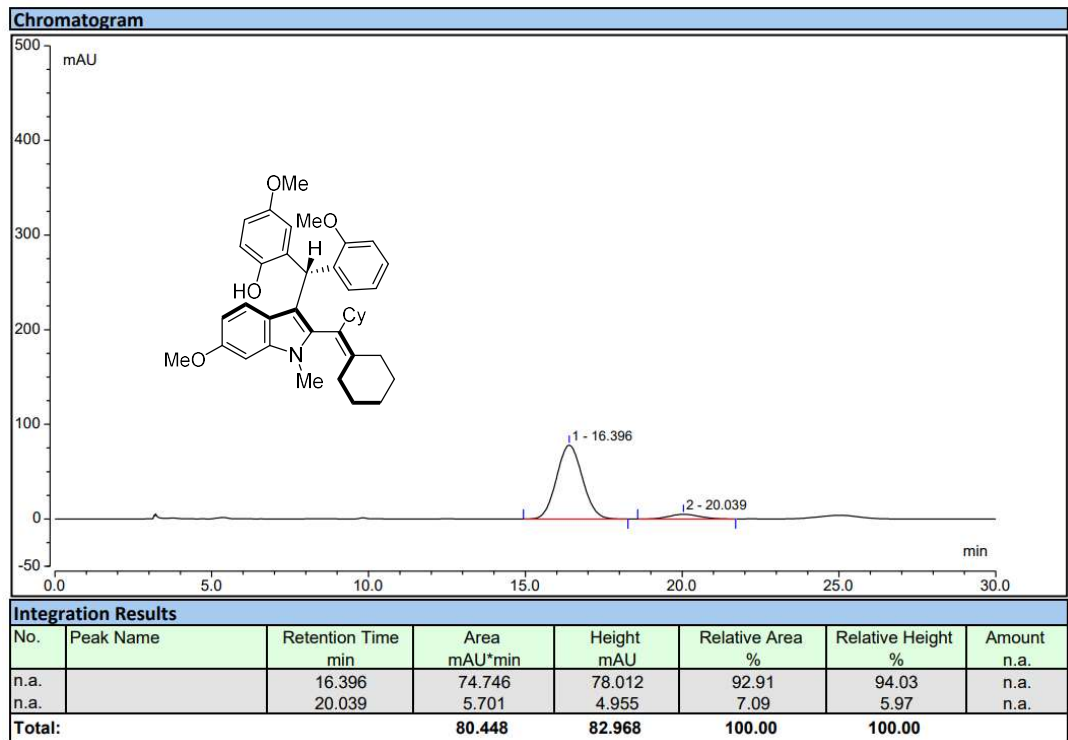

4ei

Racemic:

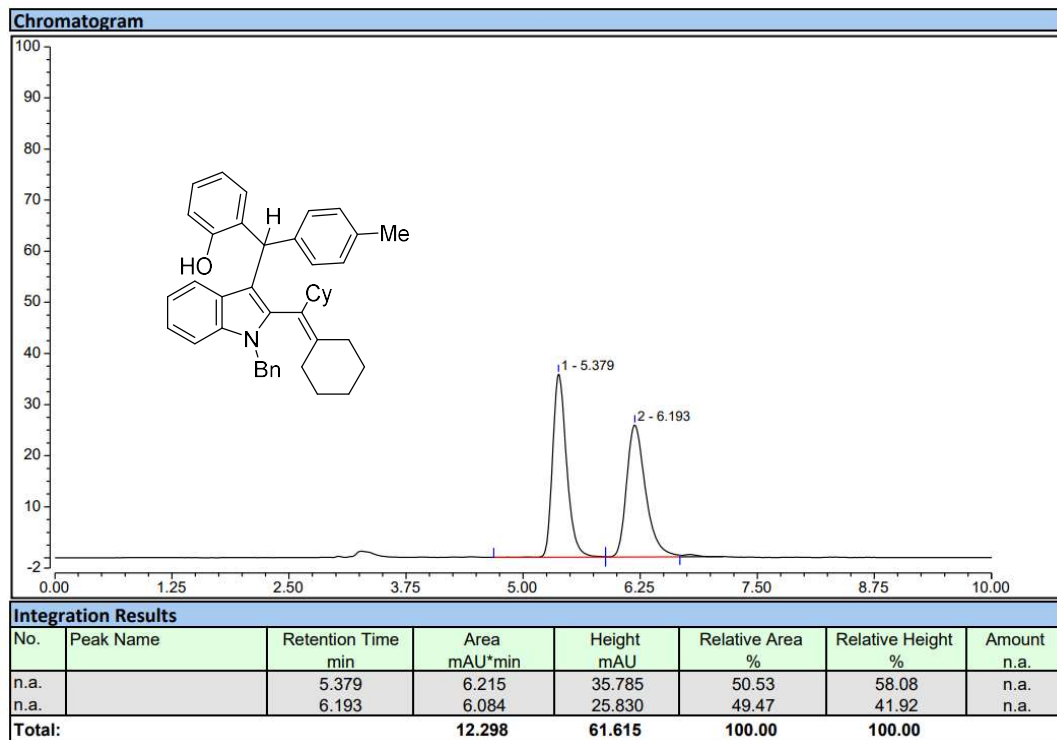

Enantioselective:

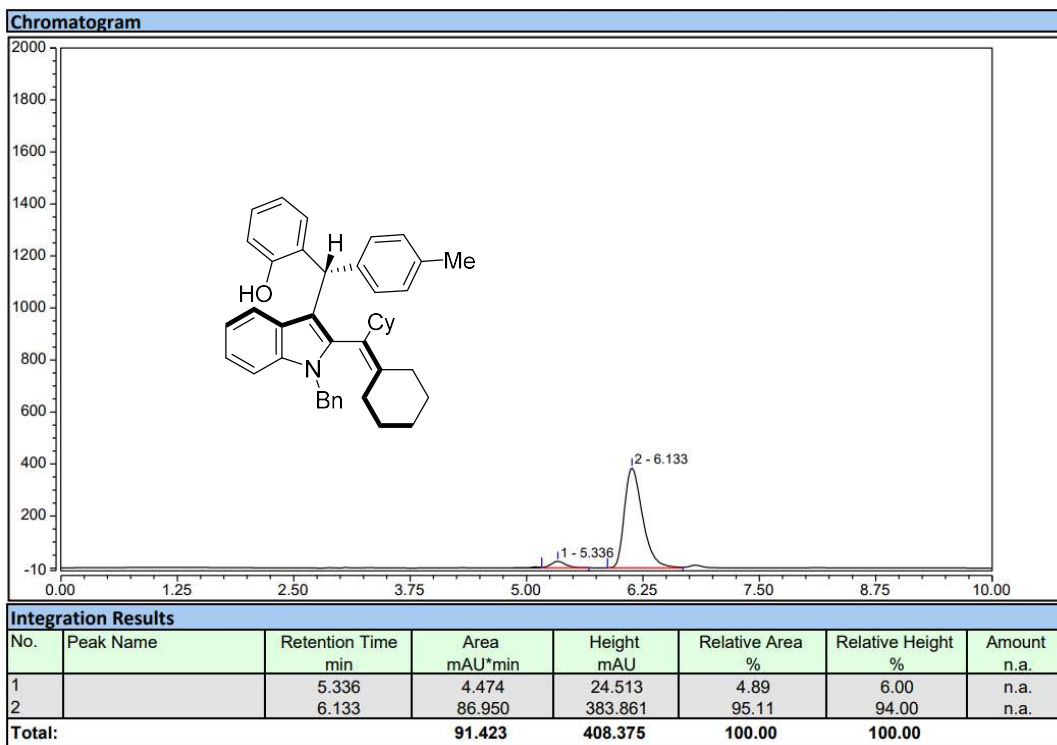

4fa

Racemic:

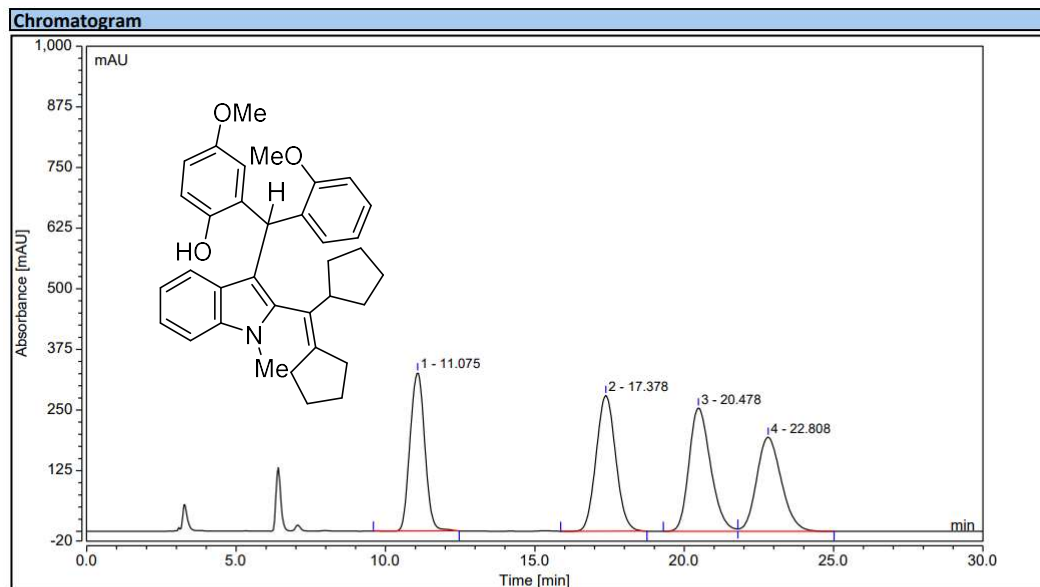

**Integration Results**

| No.           | Peak Name | Retention Time<br>min | Area<br>mAU*min | Height<br>mAU   | Relative Area<br>% | Relative Height<br>% | Amount<br>n.a. |
|---------------|-----------|-----------------------|-----------------|-----------------|--------------------|----------------------|----------------|
| 1             |           | 11.075                | 186.348         | 326.108         | 23.33              | 30.93                | n.a.           |
| 2             |           | 17.378                | 212.831         | 279.805         | 26.64              | 26.54                | n.a.           |
| 3             |           | 20.478                | 213.439         | 254.299         | 26.72              | 24.12                | n.a.           |
| 4             |           | 22.808                | 186.236         | 193.992         | 23.31              | 18.40                | n.a.           |
| <b>Total:</b> |           |                       | <b>798.853</b>  | <b>1054.203</b> | <b>100.00</b>      | <b>100.00</b>        |                |

Enantioselective:

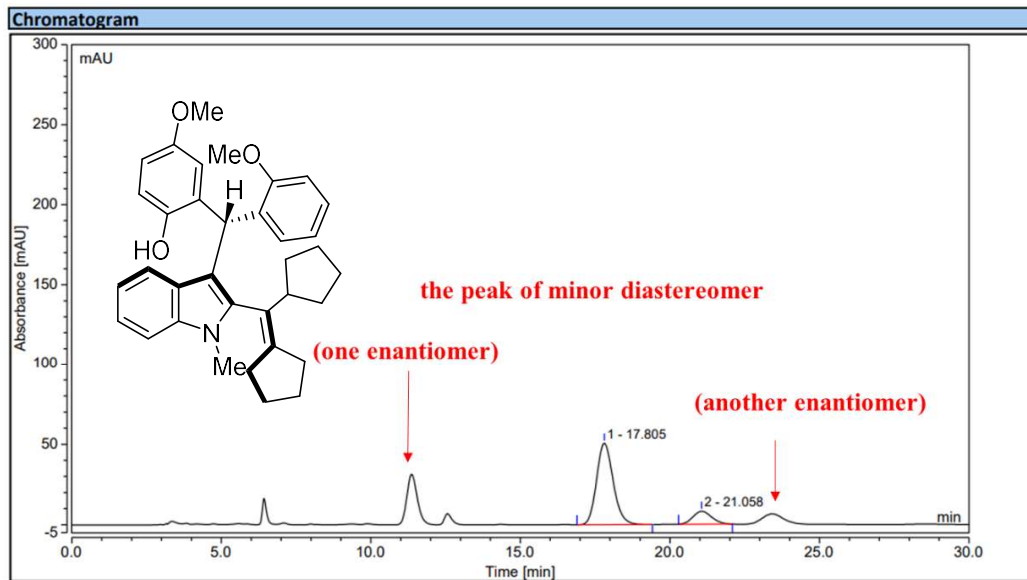

**Integration Results**

| No.           | Peak Name | Retention Time<br>min | Area<br>mAU*min | Height<br>mAU | Relative Area<br>% | Relative Height<br>% | Amount<br>n.a. |
|---------------|-----------|-----------------------|-----------------|---------------|--------------------|----------------------|----------------|
| 1             |           | 17.805                | 32.719          | 50.749        | 84.76              | 86.24                | n.a.           |
| 2             |           | 21.058                | 5.882           | 8.098         | 15.24              | 13.76                | n.a.           |
| <b>Total:</b> |           |                       | <b>38.601</b>   | <b>58.847</b> | <b>100.00</b>      | <b>100.00</b>        |                |

4ga

Racemic:

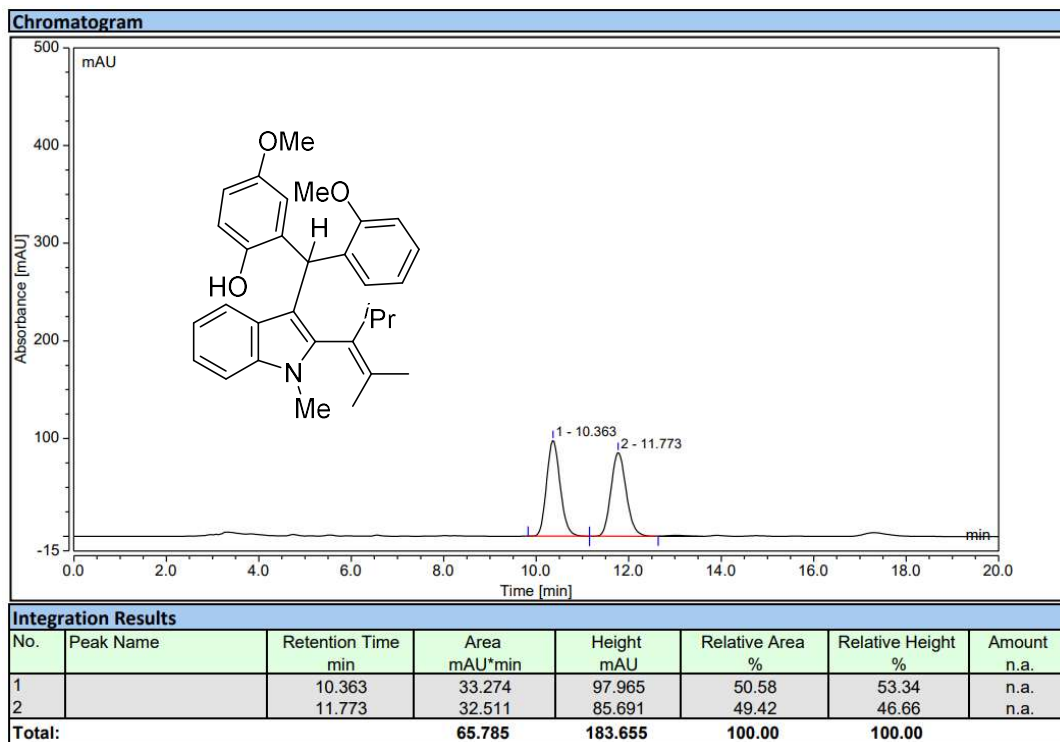

Enantioselective:

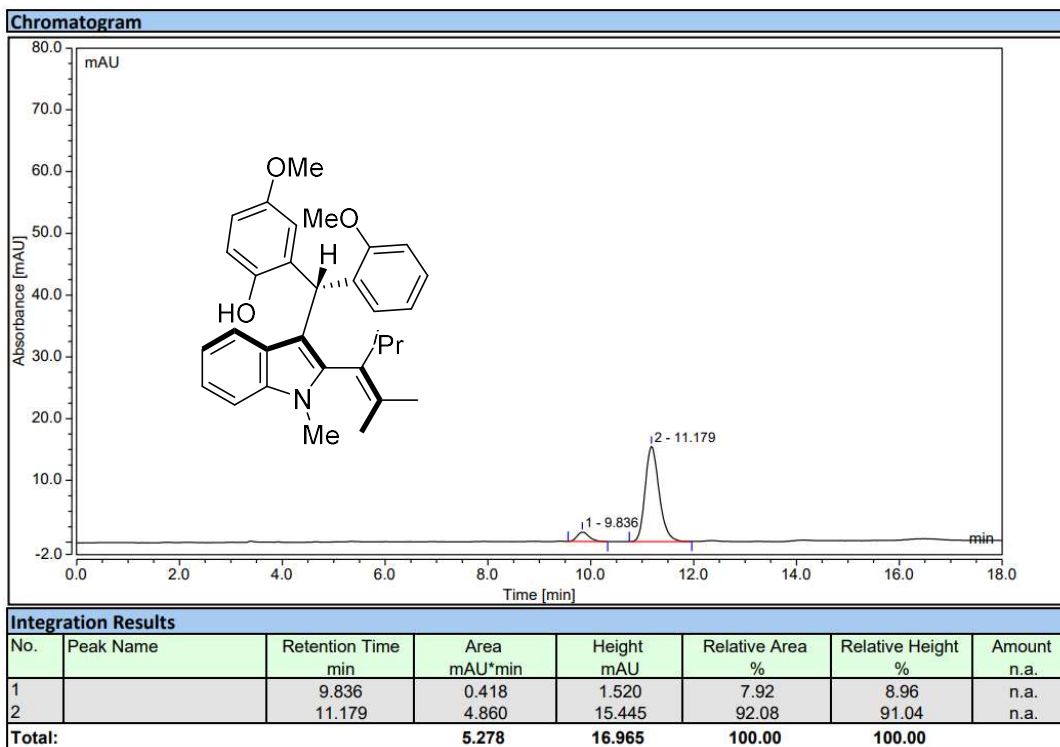

8

Racemic:

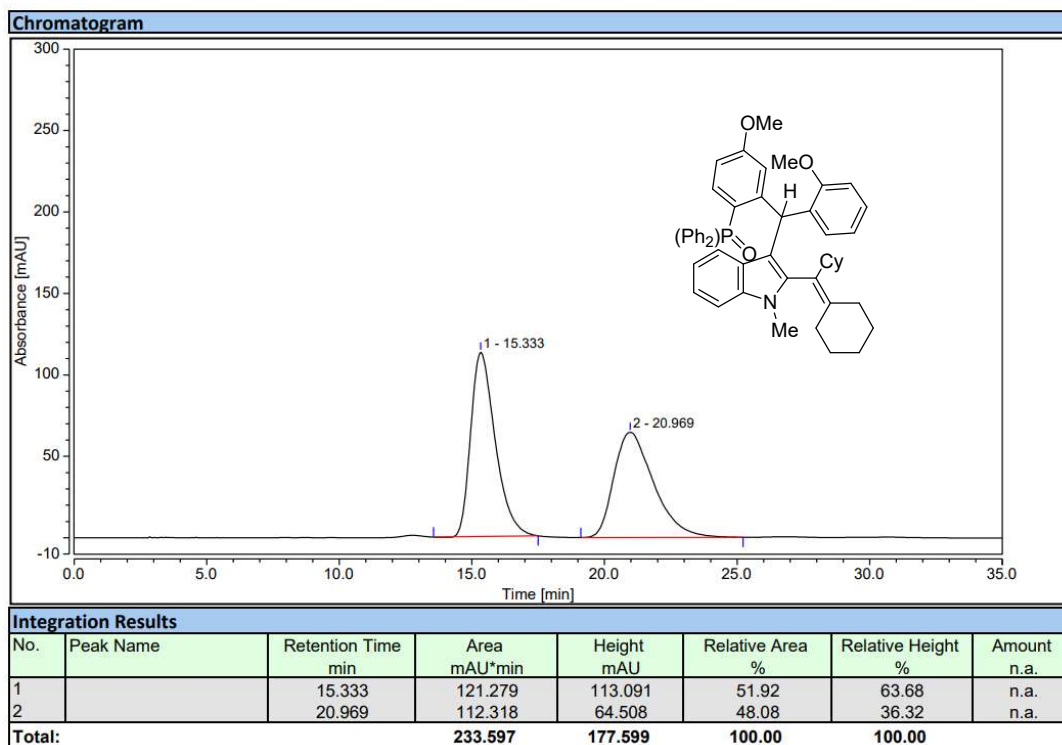

Enantioselective:

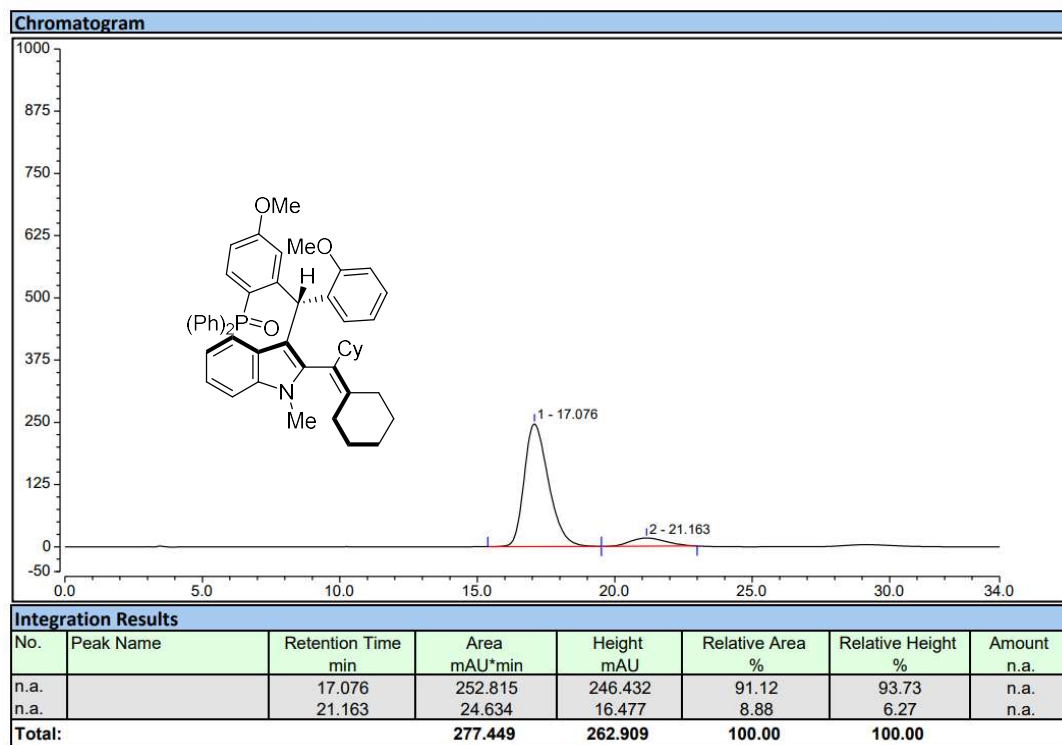

10

Racemic:

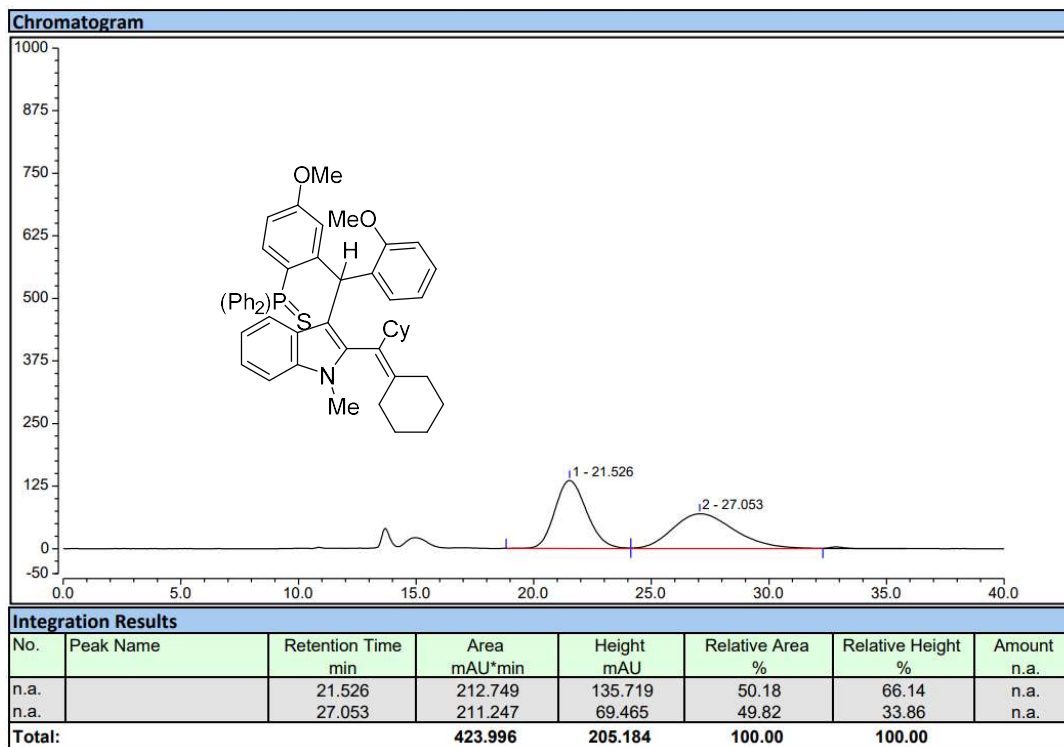

Enantioselective:

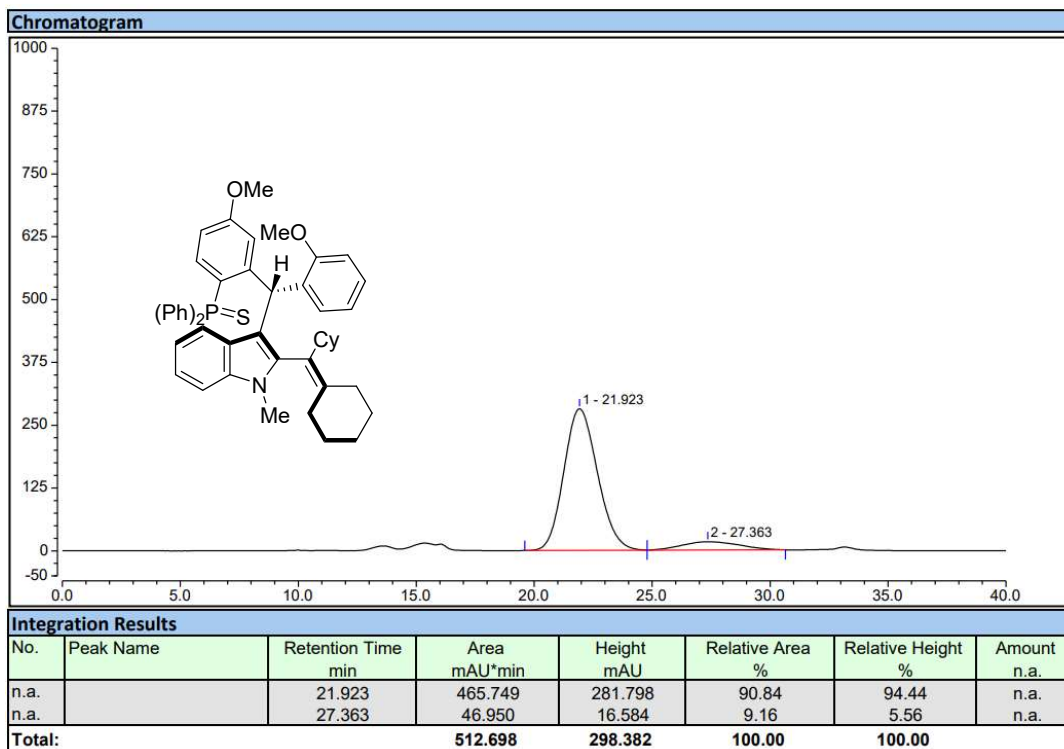



13

Racemic:

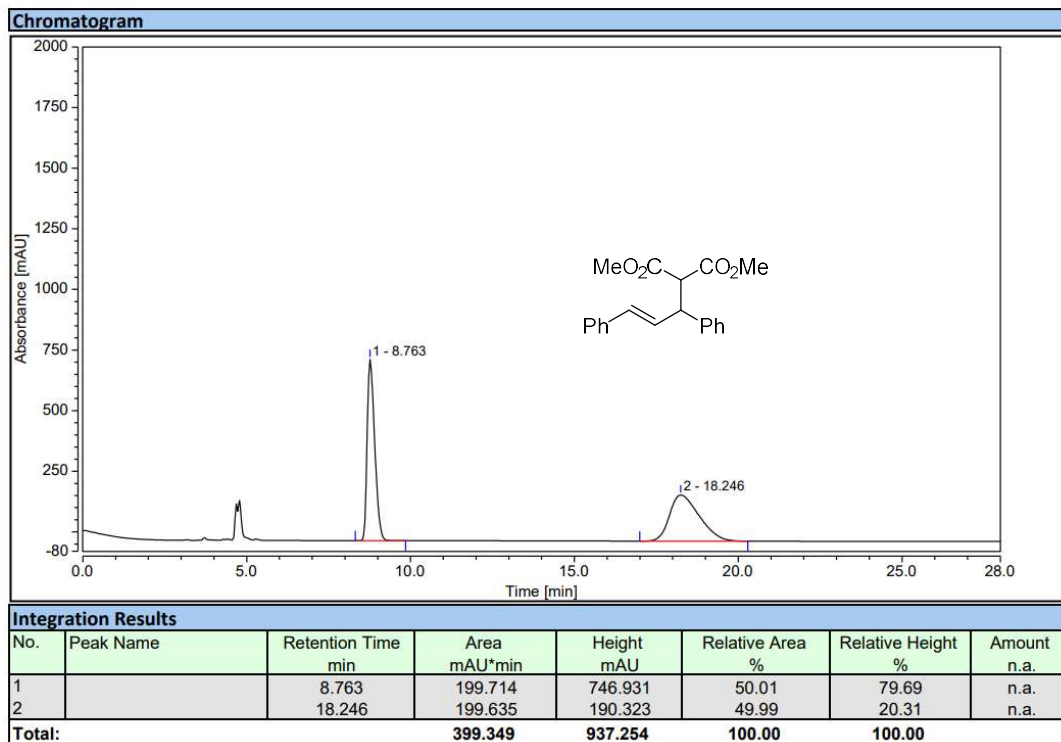

Enantioselective:

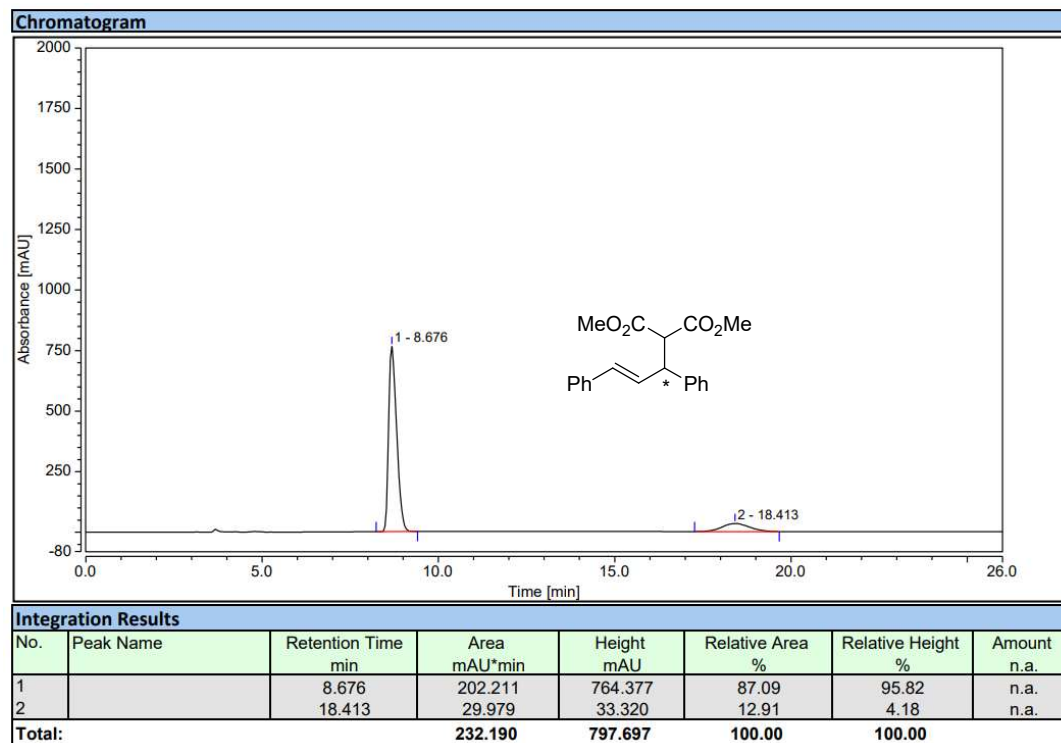

S12

Racemic:

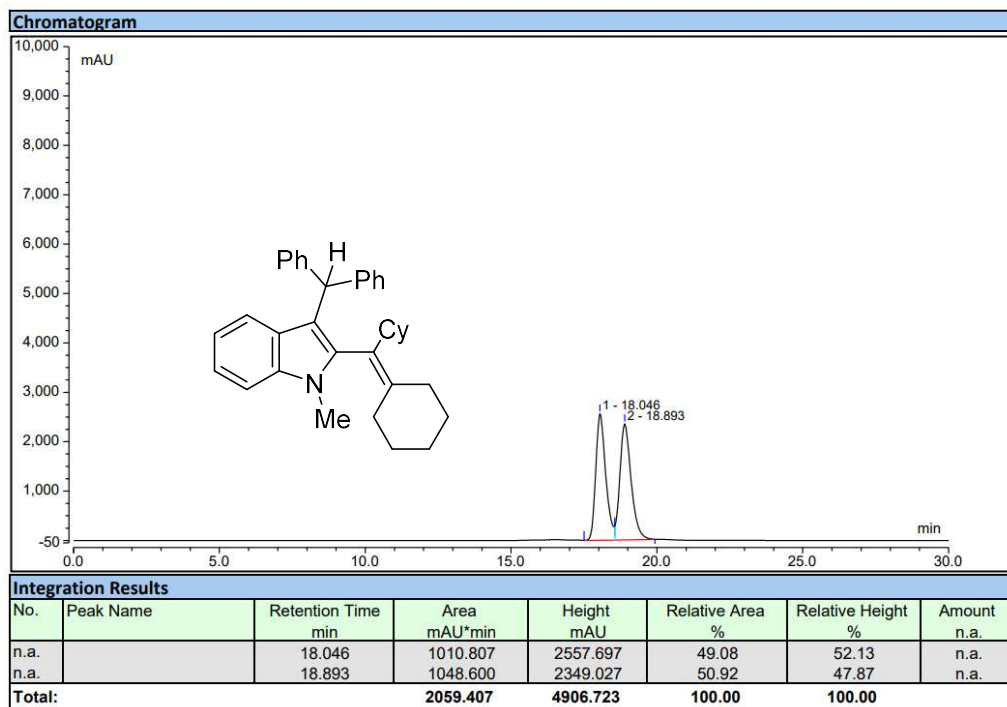

Enantioselective:

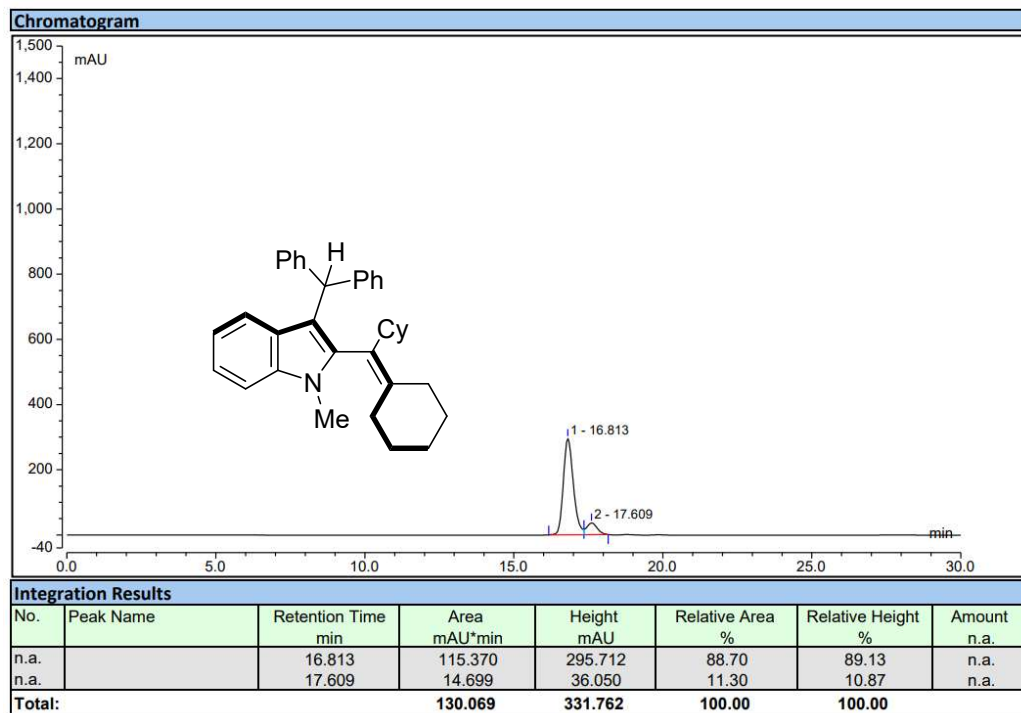

## 15. Biological evaluation of selected compounds **3** and **4**

### Procedure for determination of Hep G2 cell viability by Cell Counting Kit-8 (CCK8) assay:

Human liver cancer cell lines (HepG2) were seeded in 96-well plates at the density of 5000 cells per well with 100  $\mu$ L of complete culture medium. After adhesion for 24 hours, the medium was changed to DMEM supplemented without FBS. The selected products **3ak**, **3af**, **3ah** and **4ak** were added to the medium with final concentrations ranging from 6.25  $\mu$ g/mL to 100  $\mu$ g/mL. Besides, the selected products **4af** and **4ah** were added to the medium with final concentrations ranging from 12.5  $\mu$ g/mL to 200  $\mu$ g/mL. The cells were then cultured for another 24 h. Cells that did not exposed to products **3** or **4** were used as controls, and the wells to which only culture medium was added served as blanks. At the end of compounds stimulation, the supernatant was removed, and 100  $\mu$ L of DMEM containing 10  $\mu$ L of CCK8 was added to each well for another 1 h at 37 °C. The culture plates were then shaken for 5s and the optical density (OD) values were read at 450 nm. Then, the IC<sub>50</sub> values of tested products **3** to HepG2 cell line were calculated by GraphPad software.

**Table S7.** Cytotoxicity of selected products **3** and **4** on HepG2 cancer cell line

| Compound   | Viability rate of HepG2 cancer cell line (%) |                       |                     |                     |                      | IC <sub>50</sub><br>( $\mu$ g/mL) <sup>a</sup> |
|------------|----------------------------------------------|-----------------------|---------------------|---------------------|----------------------|------------------------------------------------|
|            | 6.25<br>( $\mu$ g/mL)                        | 12.5<br>( $\mu$ g/mL) | 25<br>( $\mu$ g/mL) | 50<br>( $\mu$ g/mL) | 100<br>( $\mu$ g/mL) |                                                |
| <b>3af</b> | 77.20 $\pm$ 0.03                             | 62.81 $\pm$ 0.04      | 33.26 $\pm$ 0.03    | 11.86 $\pm$ 0.03    | 7.00 $\pm$ 0.01      | 20.0                                           |
| <b>3ah</b> | 85.93 $\pm$ 0.07                             | 80.47 $\pm$ 0.10      | 58.23 $\pm$ 0.10    | 42.30 $\pm$ 0.06    | 31.14 $\pm$ 0.05     | 25.6                                           |
| <b>3ak</b> | 92.69 $\pm$ 0.10                             | 80.31 $\pm$ 0.07      | 52.57 $\pm$ 0.03    | 35.09 $\pm$ 0.02    | 10.38 $\pm$ 0.01     | 37.1                                           |
| <b>4ak</b> | 91.20 $\pm$ 0.13                             | 81.60 $\pm$ 0.13      | 53.71 $\pm$ 0.06    | 36.44 $\pm$ 0.07    | 15.39 $\pm$ 0.04     | 31.7                                           |

<sup>a</sup>The IC<sub>50</sub> value corresponded to the compound concentration causing 50% mortality in cancer cells.

**Table S8.** Cytotoxicity of selected products **4** on HepG2 cancer cell line

| Compound   | Viability rate of Hep G2 cancer cell line (%) |                     |                     |                      |                      | IC <sub>50</sub><br>( $\mu$ g/mL) <sup>a</sup> |
|------------|-----------------------------------------------|---------------------|---------------------|----------------------|----------------------|------------------------------------------------|
|            | 12.5<br>( $\mu$ g/mL)                         | 25<br>( $\mu$ g/mL) | 50<br>( $\mu$ g/mL) | 100<br>( $\mu$ g/mL) | 200<br>( $\mu$ g/mL) |                                                |
| <b>4af</b> | 92.58 $\pm$ 0.06                              | 79.70 $\pm$ 0.09    | 57.62 $\pm$ 0.04    | 36.20 $\pm$ 0.01     | 22.53 $\pm$ 0.01     | 50.4                                           |
| <b>4ah</b> | 80.08 $\pm$ 0.08                              | 54.74 $\pm$ 0.06    | 42.18 $\pm$ 0.06    | 11.65 $\pm$ 0.02     | 8.88 $\pm$ 0.05      | 41.6                                           |

<sup>a</sup>The IC<sub>50</sub> value corresponded to the compound concentration causing 50% mortality in cancer cells.

**Procedure for determination of PC-3 cell viability by MTT assay:**

Human prostate cancer cells (PC-3) were seeded in 96-well plates at the density of 4000 cells per well with 100  $\mu\text{L}$  of complete culture medium. After adhesion for 48 hours, selected products **3** were added to the medium with five concentrations ranging from 15.625  $\mu\text{g/mL}$  to 250  $\mu\text{g/mL}$ . The cells were then cultured for another 24 h. Cells that did not exposed to products **3** were used as controls, and the wells to which only culture medium was added served as blanks. At the end of stimulation, 20  $\mu\text{L}$  MTT (5 mg/mL) was added to the medium, and the cells were cultured for another 4 h. Then, the supernatant was removed, and 150  $\mu\text{L}$  of DMSO was added to each well for another 15 min at 37  $^{\circ}\text{C}$ . The culture plates were then shaken for 2 min and the optical density (OD) values were read at a wave-length of 490 nm in a microplate reader (BioTek ELx800, USA).

**Table S9.** Cytotoxicity of selected products **3** and **4** on PC-3 cancer cell line

| Compound   | Viability rate of PC-3 cancer cell line (%) |                               |                              |                             |                             | IC <sub>50</sub><br>( $\mu\text{g/mL}$ ) <sup>a</sup> |
|------------|---------------------------------------------|-------------------------------|------------------------------|-----------------------------|-----------------------------|-------------------------------------------------------|
|            | 15.625<br>( $\mu\text{g/mL}$ )              | 31.25<br>( $\mu\text{g/mL}$ ) | 62.5<br>( $\mu\text{g/mL}$ ) | 125<br>( $\mu\text{g/mL}$ ) | 250<br>( $\mu\text{g/mL}$ ) |                                                       |
| <b>3ac</b> | 50.47 $\pm$ 0.34                            | 34.89 $\pm$ 2.72              | 16.48 $\pm$ 1.01             | 9.09 $\pm$ 1.26             | 1.73 $\pm$ 0.11             | 16.7                                                  |
| <b>3ak</b> | 85.48 $\pm$ 2.1                             | 71.73 $\pm$ 1.7               | 61.94 $\pm$ 3.65             | 38.16 $\pm$ 4.06            | 13.79 $\pm$ 1.75            | 78.0                                                  |
| <b>4ai</b> | 71.38 $\pm$ 1.03                            | 62.62 $\pm$ 1.29              | 45.64 $\pm$ 0.96             | 34.67 $\pm$ 1.04            | 20.93 $\pm$ 3.59            | 53.1                                                  |
| <b>4ak</b> | 72.75 $\pm$ 1.33                            | 66.03 $\pm$ 1.92              | 57.32 $\pm$ 3.85             | 41.55 $\pm$ 4.36            | 21.82 $\pm$ 3.88            | 71.5                                                  |

<sup>a</sup>The IC<sub>50</sub> value corresponded to the compound concentration causing 50% mortality in cancer cells.

## 16. Theoretical calculations

### Computational details:

All calculations were performed using Gaussian 16, Revision A.03 package.<sup>1</sup> All of the reactants, intermediates, transition states, products were optimized by the DFT with the M06-2X functional.<sup>2</sup> For geometry optimizations and frequency calculations, BS-I basis set system was employed. In BS-I, we employed 6-31G(d) basis sets for H, C, O, N, and P. All the stationary structures were characterized with no imaginary frequency and the transition state structures (TSs) were characterized with a single imaginary frequency. Intrinsic reaction coordinate (IRC) calculations were performed on the TSs. The solvent effect of dichloroethane or *p*-xylene was evaluated through the SMD method,<sup>3</sup> in which a better basis system BS-II was used. In BS-II, we employed 6-311++G(d,p) basis sets for all atoms. All reported energies are free energies at a concentration of 1 M and a temperature of 298.15 K. The NCI plot was prepared by Multiwfn 3.8.<sup>4</sup>

---

<sup>1</sup> Gaussian 16, Revision A.03, Frisch, M. J.; Trucks, G. W.; Schlegel, H. B.; Scuseria, G. E.; Robb, M. A.; Cheeseman, J. R.; Scalmani, G.; Barone, V.; Petersson, G. A.; Nakatsuji, H.; Li, X.; Caricato, M.; Marenich, A. V.; Bloino, J.; Janesko, B. G.; Gomperts, R.; Mennucci, B.; Hratchian, H. P.; Ortiz, J. V.; Izmaylov, A. F.; Sonnenberg, J. L.; Williams-Young, D.; Ding, F.; Lipparini, F.; Egidi, F.; Goings, J.; Peng, B.; Petrone, A.; Henderson, T.; Ranasinghe, D.; Zakrzewski, V. G.; Gao, J.; Rega, N.; Zheng, G.; Liang, W.; Hada, M.; Ehara, M.; Toyota, K.; Fukuda, R.; Hasegawa, J.; Ishida, M.; Nakajima, T.; Honda, Y.; Kitao, O.; Nakai, H.; Vreven, T.; Throssell, K.; Montgomery, J. A., Jr., Peralta, J. E.; Ogliaro, F.; Bearpark, M. J.; Heyd, J. J.; Brothers, E. N.; Kudin, K. N.; Staroverov, V. N.; Keith, T. A.; Kobayashi, R.; Normand, J.; Raghavachari, K.; Rendell, A. P.; Burant, J. C.; Iyengar, S. S.; Tomasi, J.; Cossi, M.; Millam, J. M.; Klene, M.; Adamo, C.; Cammi, R.; Ochterski, J. W.; Martin, R. L.; Morokuma, K.; Farkas, O.; Foresman, J. B.; Fox, D. J.; Gaussian, Inc., Wallingford CT, **2016**.

<sup>2</sup> Zhao, Y.; Truhlar, D. G. The M06 suite of density functionals for main group thermochemistry, thermochemical kinetics, noncovalent interactions, excited states, and transition elements: two new functionals and systematic testing of four M06-class functionals and 12 other functionals. *Theor Chem Account.*, **2008**, *120*, 215-241.

<sup>3</sup> Marenich, A. V.; Cramer, C. J.; Truhlar, D. G. Universal Solvation Model Based on Solute Electron Density and on a Continuum Model of the Solvent Defined by the Bulk Dielectric Constant and Atomic Surface Tensions. *J. Phys. Chem. B.*, **2009**, *113*, 6378-6396.

<sup>4</sup> Lu, T.; Chen, F. W. Multiwfn: A multifunctional wavefunction analyzer. *J. Comput. Chem.* **2012**, *33*, 580-592.

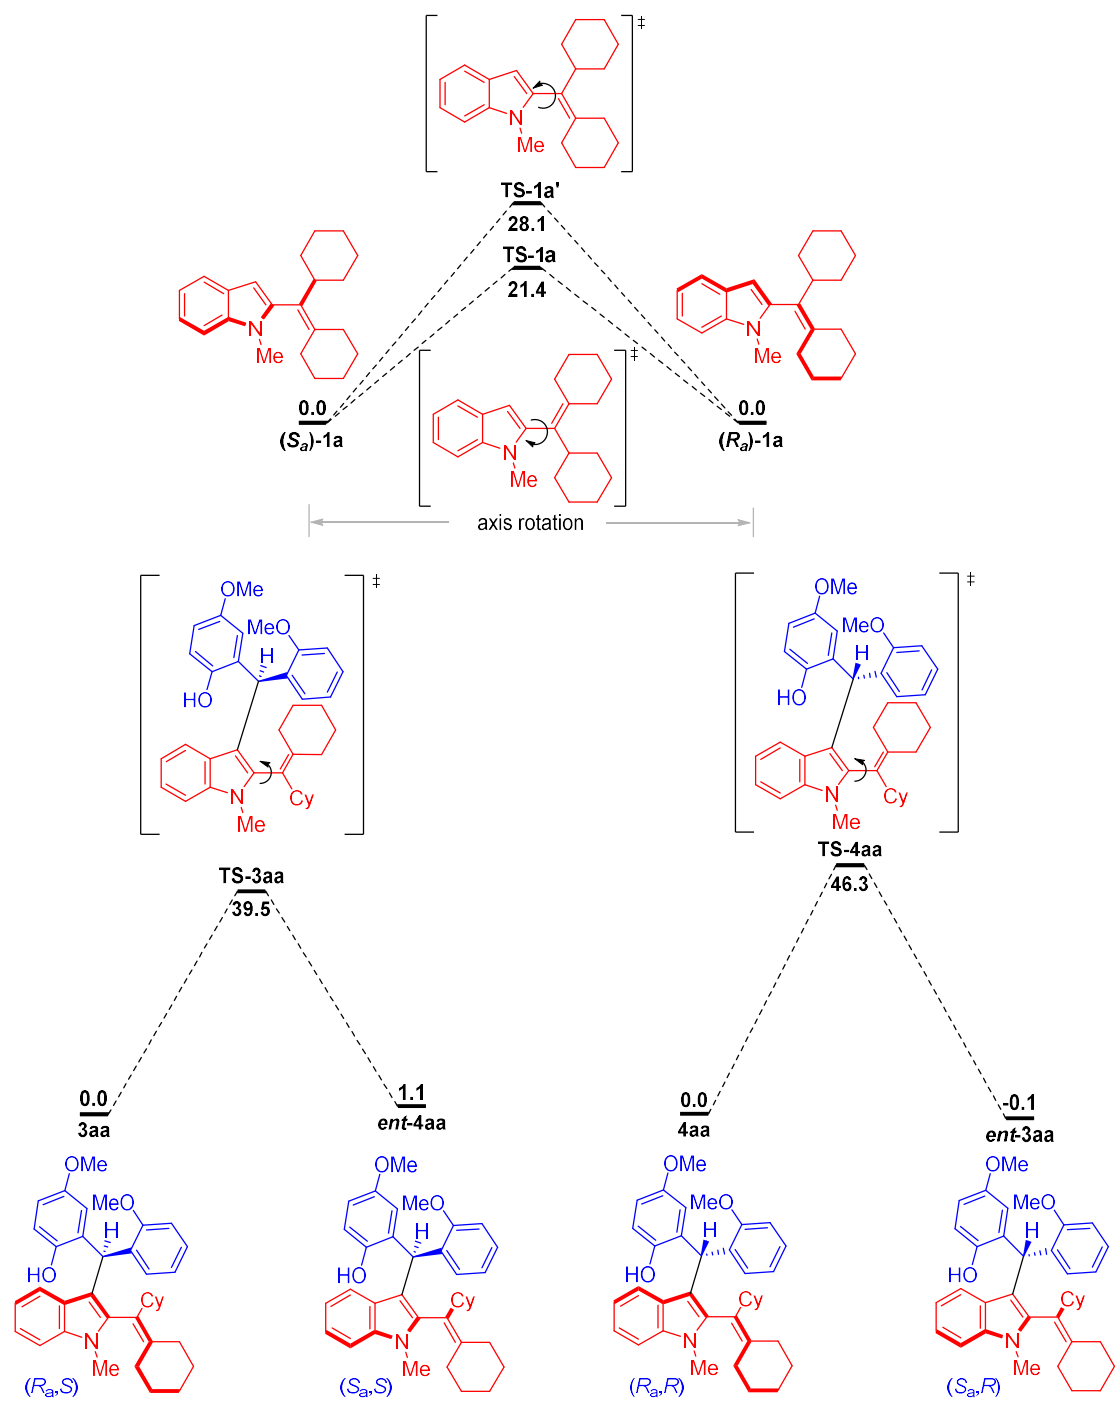

**Figure S3.** Calculated rotational barriers of the substrate **1a** and products **3aa**, **4aa** ( $\text{kcal}\cdot\text{mol}^{-1}$ )

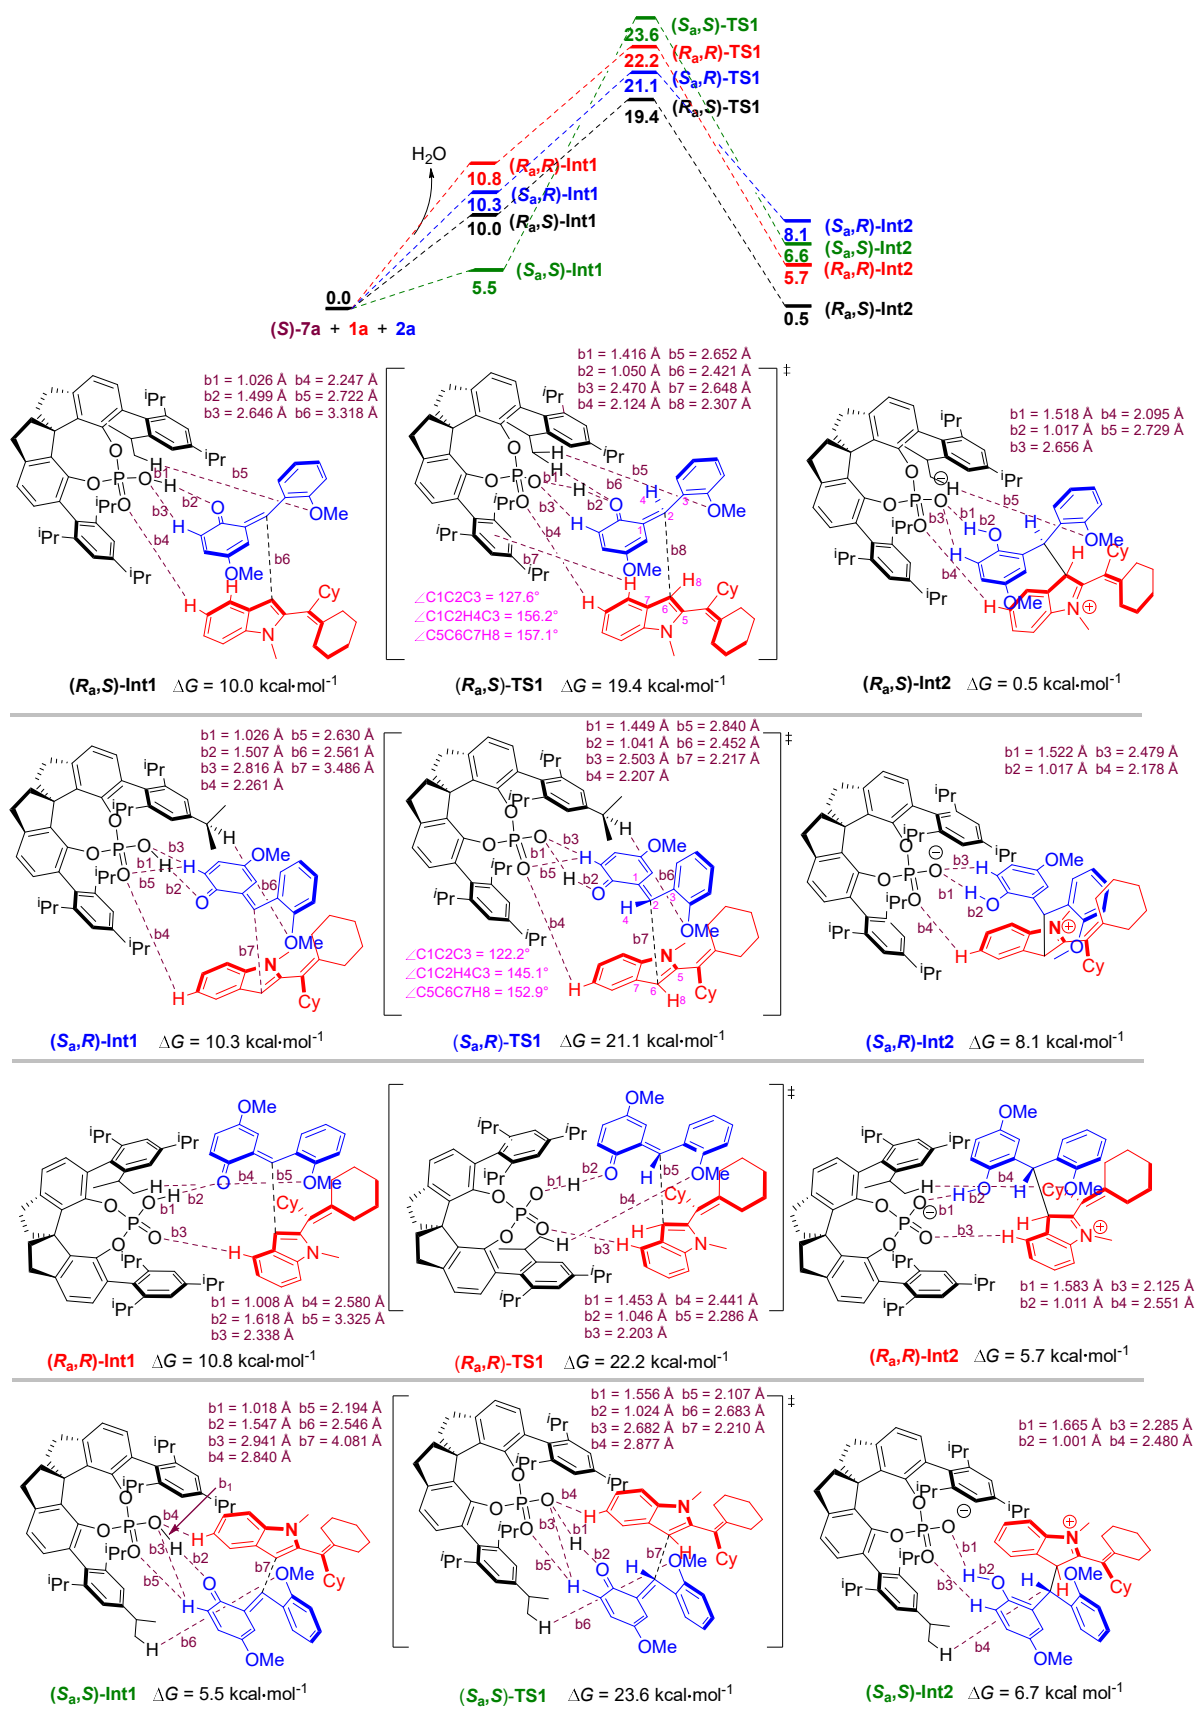

Figure S4. The calculated key reaction pathway for the synthesis of product 3aa

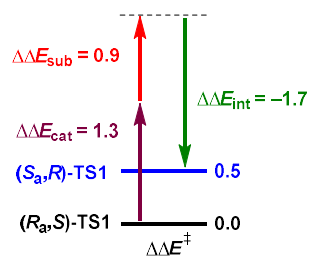

**Figure S5.** Energy decomposition analysis for  $(R_a,S)\text{-TS1}$  and  $(S_a,R)\text{-TS1}$

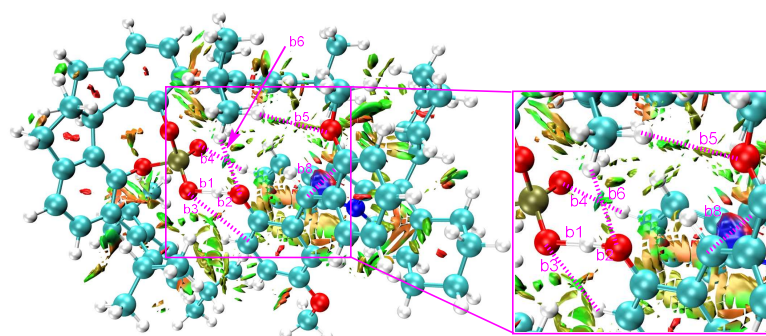

$(R_a,S)\text{-TS1}$   $\Delta G = 19.4 \text{ kcal}\cdot\text{mol}^{-1}$

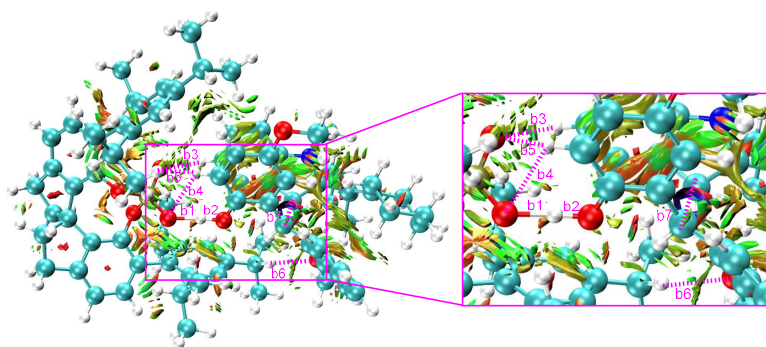

$(S_a,R)\text{-TS1}$   $\Delta G = 21.1 \text{ kcal}\cdot\text{mol}^{-1}$

**Figure S6.** Visualization of noncovalent interactions in  $(R_a,S)\text{-TS1}$  and  $(S_a,R)\text{-TS1}$



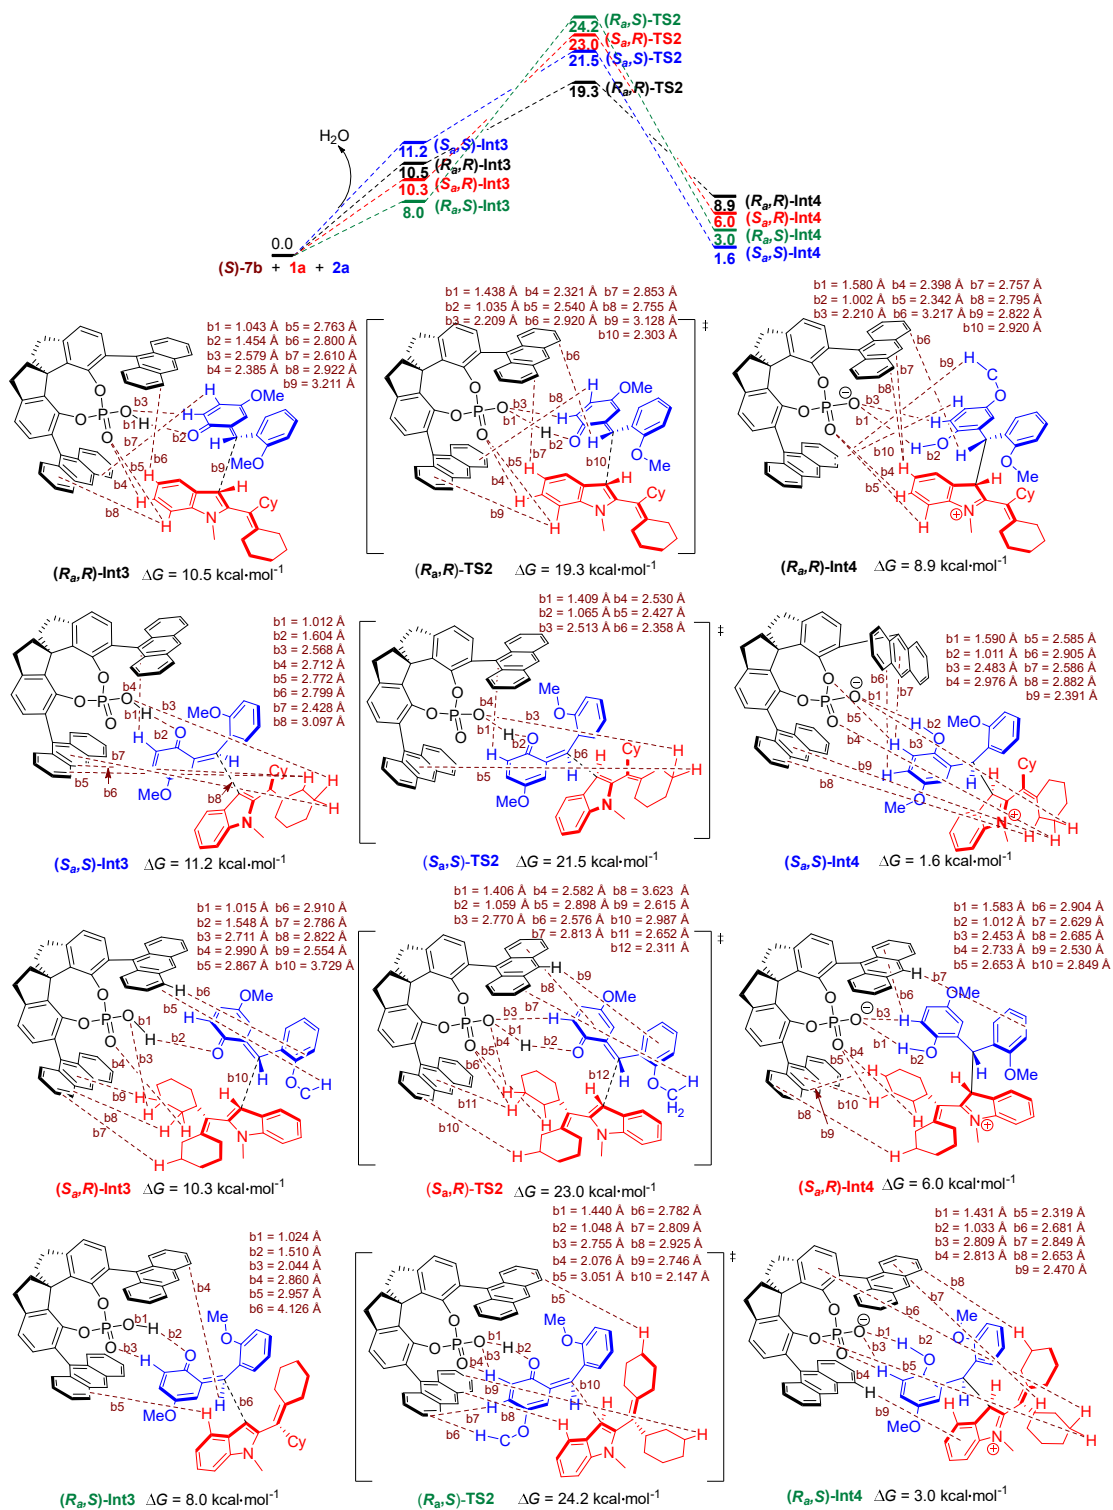

**Figure S7.** The calculated key reaction pathway for the synthesis of product **4aa**

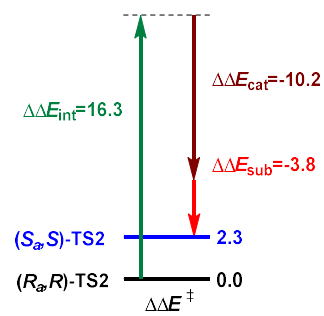

Figure S8. Energy decomposition analysis for  $(R_a,R)\text{-TS2}$  and  $(S_a,S)\text{-TS2}$

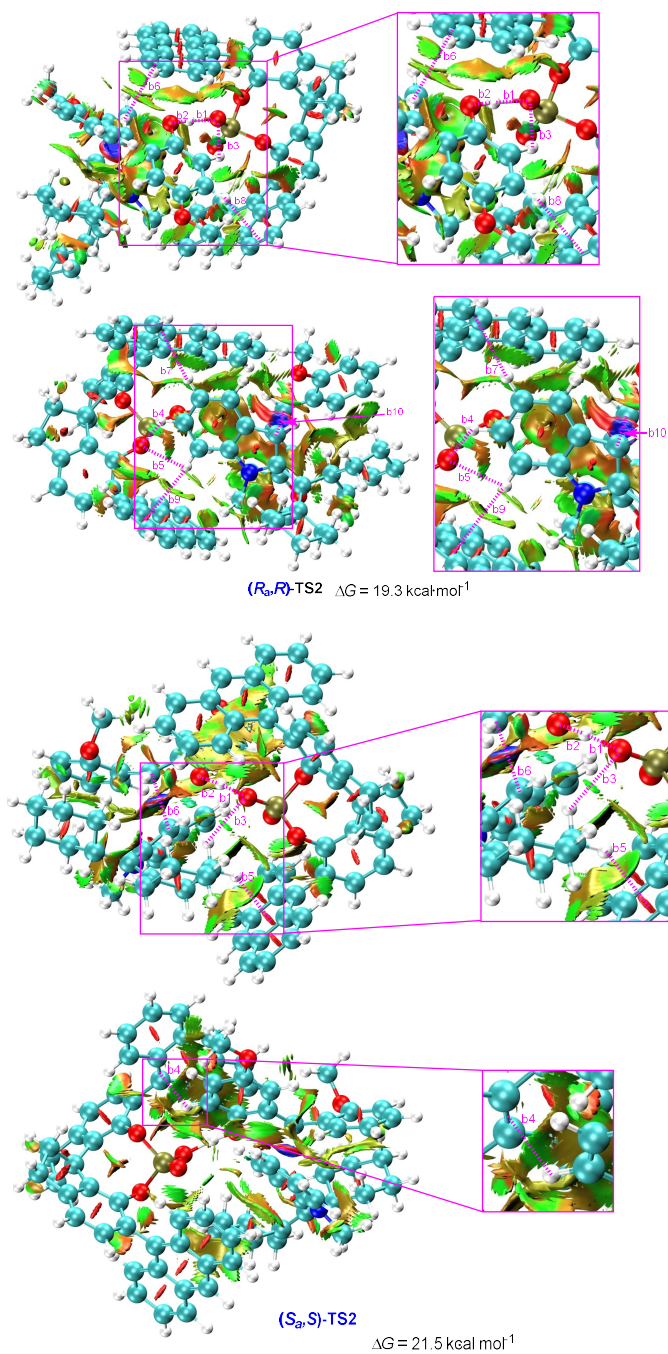

Figure S9. Visualization of noncovalent interactions in  $(R_a,R)\text{-TS2}$  and  $(S_a,S)\text{-TS2}$

**Cartesian coordinates of the optimized structures:**

**(S<sub>a</sub>)-1a**

E = -910.158267744 a.u.

0 1

|   |             |             |             |
|---|-------------|-------------|-------------|
| C | -1.41594400 | -1.73385600 | 0.37413000  |
| C | -2.62895500 | -2.36427900 | 0.74172800  |
| C | -3.68408800 | -1.57159500 | 1.21845400  |
| C | -3.50718200 | -0.20154400 | 1.31346900  |
| C | -2.29102300 | 0.40329600  | 0.94216400  |
| C | -1.22975100 | -0.35129900 | 0.46901200  |
| C | -1.16956800 | -3.94288000 | 0.03571000  |
| C | -2.44215400 | -3.76808600 | 0.51626200  |
| H | -4.62567800 | -2.02899100 | 1.50780300  |
| H | -4.31763800 | 0.42059000  | 1.67987300  |
| H | -2.18360000 | 1.48002100  | 1.02728300  |
| H | -0.29228600 | 0.11453600  | 0.18003000  |
| H | -3.15310800 | -4.56204500 | 0.69679700  |
| N | -0.54215900 | -2.70797100 | -0.05205800 |
| C | 0.81551000  | -2.45201300 | -0.47188300 |
| H | 0.83541700  | -1.85612600 | -1.39112200 |
| H | 1.35948000  | -1.91284600 | 0.31095900  |
| H | 1.31188500  | -3.40644600 | -0.65309800 |
| C | -0.50047300 | -5.19593100 | -0.40092200 |
| C | -0.82706000 | -5.65335600 | -1.81549200 |
| C | -2.13665000 | -6.46099300 | -1.84046000 |
| C | -0.91355300 | -4.48507300 | -2.81131000 |
| H | -0.02332800 | -6.31243200 | -2.16849800 |
| C | -2.47412100 | -6.94937900 | -3.25092400 |
| H | -2.94696900 | -5.81730100 | -1.46986100 |
| H | -2.05609000 | -7.30664400 | -1.14625900 |
| C | -1.23682000 | -4.98121800 | -4.22273000 |
| H | -1.69785500 | -3.78955700 | -2.48292200 |
| H | 0.02999500  | -3.92488000 | -2.81360300 |
| C | -2.54024800 | -5.78251100 | -4.23846700 |
| H | -3.42184200 | -7.49895200 | -3.24286400 |
| H | -1.70009100 | -7.65649800 | -3.58148000 |
| H | -1.30220700 | -4.13248900 | -4.91219200 |
| H | -0.41696900 | -5.61943400 | -4.58161300 |
| H | -2.75173800 | -6.14903600 | -5.24894700 |
| H | -3.37105100 | -5.12059500 | -3.95787200 |
| C | 0.27561900  | -5.87748100 | 0.46083500  |
| C | 0.88916300  | -7.22984600 | 0.18243700  |
| C | 0.54118600  | -5.40508900 | 1.87234000  |

|   |             |             |             |
|---|-------------|-------------|-------------|
| C | 0.35871300  | -8.26374400 | 1.19218900  |
| H | 1.98072500  | -7.15939500 | 0.29930500  |
| H | 0.69400700  | -7.57433100 | -0.83519700 |
| C | 0.01110100  | -6.42975000 | 2.88786500  |
| H | 1.62865500  | -5.30647700 | 2.01140100  |
| H | 0.09544500  | -4.42398000 | 2.05423100  |
| C | 0.60914200  | -7.81401500 | 2.63266100  |
| H | 0.82648800  | -9.23660600 | 1.00603300  |
| H | -0.72078500 | -8.38811200 | 1.03377000  |
| H | 0.23433800  | -6.09586000 | 3.90679300  |
| H | -1.08181200 | -6.47768800 | 2.79473300  |
| H | 0.19535500  | -8.54523500 | 3.33557700  |
| H | 1.69270700  | -7.77651800 | 2.81345400  |

### TS-1a

E = -910.124440494 a.u.

0 1

|   |             |             |             |
|---|-------------|-------------|-------------|
| C | 0.07324800  | -1.84161600 | 0.09550400  |
| C | -1.29621400 | -1.73437400 | -0.20633300 |
| C | -1.84588500 | -0.47880100 | -0.50920200 |
| C | -1.02102000 | 0.63142600  | -0.49849400 |
| C | 0.34741100  | 0.50871300  | -0.19069800 |
| C | 0.91197600  | -0.72004400 | 0.11182500  |
| C | -0.81421800 | -3.93722400 | 0.19394400  |
| C | -1.83006900 | -3.05068200 | -0.11610100 |
| H | -2.90156600 | -0.38571600 | -0.74690900 |
| H | -1.42794400 | 1.61009400  | -0.73181400 |
| H | 0.97636300  | 1.39334100  | -0.19791700 |
| H | 1.97299800  | -0.80095800 | 0.32484800  |
| H | -2.86942700 | -3.27233200 | -0.26385600 |
| N | 0.36465000  | -3.16565500 | 0.36253600  |
| C | 1.57645100  | -3.44387800 | 1.12400900  |
| H | 2.40960300  | -3.76271900 | 0.48844700  |
| H | 1.86780500  | -2.52681500 | 1.63977900  |
| H | 1.39665400  | -4.19741300 | 1.88707800  |
| C | -0.85978000 | -5.42497700 | 0.31056300  |
| C | 0.47880500  | -6.15732300 | 0.47664100  |
| C | 0.81527100  | -6.65463300 | 1.89654200  |
| C | 0.72710900  | -7.26469500 | -0.56959000 |
| H | 1.25239900  | -5.43438600 | 0.21804500  |
| C | 2.26572700  | -7.14021600 | 1.96624600  |
| H | 0.15420200  | -7.48138600 | 2.18018000  |
| H | 0.62905000  | -5.86660000 | 2.63595400  |
| C | 2.17707800  | -7.75322400 | -0.48378000 |

|   |             |             |             |
|---|-------------|-------------|-------------|
| H | 0.05694000  | -8.11886300 | -0.43239800 |
| H | 0.51866000  | -6.86031200 | -1.56612600 |
| C | 2.52190700  | -8.23573200 | 0.92772900  |
| H | 2.49691000  | -7.50539000 | 2.97290000  |
| H | 2.94175700  | -6.29432400 | 1.77159900  |
| H | 2.34834800  | -8.55366600 | -1.21185300 |
| H | 2.85295100  | -6.92959600 | -0.75523600 |
| H | 3.56497200  | -8.56725700 | 0.97343900  |
| H | 1.89988300  | -9.10896100 | 1.17060200  |
| C | -2.00654900 | -6.14554700 | 0.19092500  |
| C | -3.36349500 | -5.67175600 | -0.27532400 |
| C | -2.17352500 | -7.55702700 | 0.71845900  |
| C | -4.29082600 | -5.47883100 | 0.93517800  |
| H | -3.78668000 | -6.48165500 | -0.88687900 |
| H | -3.31711800 | -4.80842500 | -0.93132100 |
| C | -3.09256400 | -7.47269100 | 1.95911700  |
| H | -2.64842400 | -8.19481600 | -0.03996000 |
| H | -1.24446000 | -8.03818800 | 1.00892100  |
| C | -4.44649300 | -6.82544600 | 1.65136500  |
| H | -5.27008300 | -5.10057300 | 0.62119900  |
| H | -3.85135700 | -4.73506200 | 1.61222000  |
| H | -3.24243800 | -8.47637100 | 2.37321000  |
| H | -2.57060500 | -6.88130300 | 2.72315800  |
| H | -5.02296200 | -6.70699300 | 2.57533700  |
| H | -5.02222900 | -7.49978700 | 1.00240000  |

### TS-1a'

E = -910.112969074 a.u.

0 1

|   |             |             |             |
|---|-------------|-------------|-------------|
| C | -0.28640400 | -1.62527500 | -0.39439900 |
| C | 0.89879100  | -1.93275100 | 0.31348900  |
| C | 1.92214700  | -0.97569500 | 0.42902900  |
| C | 1.74499400  | 0.26857100  | -0.15636200 |
| C | 0.55885800  | 0.56683600  | -0.85704300 |
| C | -0.46525600 | -0.36559800 | -0.98502300 |
| C | -0.47784300 | -3.78545100 | 0.36630000  |
| C | 0.75116600  | -3.26428600 | 0.77541300  |
| H | 2.83404800  | -1.21382300 | 0.97013300  |
| H | 2.52369300  | 1.02182800  | -0.07883900 |
| H | 0.44041500  | 1.54514100  | -1.31411600 |
| H | -1.35712600 | -0.10532300 | -1.54528700 |
| H | 1.52679300  | -3.78745300 | 1.30631400  |
| N | -1.11652900 | -2.74178100 | -0.36451400 |
| C | -2.47076700 | -2.60469100 | -0.86666600 |

|   |             |             |             |
|---|-------------|-------------|-------------|
| H | -2.66468200 | -3.25403300 | -1.72212300 |
| H | -3.20963400 | -2.78916400 | -0.08200500 |
| H | -2.60745400 | -1.57560800 | -1.19367300 |
| C | -0.79230100 | -5.24373800 | 0.52914800  |
| C | 0.24118500  | -5.91048400 | 1.47348600  |
| C | -0.31937600 | -6.92750800 | 2.49278900  |
| C | 1.51942000  | -6.45031900 | 0.79537600  |
| H | 0.57127400  | -5.10574100 | 2.13216800  |
| C | 0.75138600  | -7.25145500 | 3.54593800  |
| H | -0.62592400 | -7.86548100 | 2.02503800  |
| H | -1.21344900 | -6.50640400 | 2.96843500  |
| C | 2.58128000  | -6.80982800 | 1.84444200  |
| H | 1.28755300  | -7.34205600 | 0.19996100  |
| H | 1.90952800  | -5.70497400 | 0.09409300  |
| C | 2.03046000  | -7.79036700 | 2.88922300  |
| H | 0.35972500  | -7.97954200 | 4.26737900  |
| H | 0.99244100  | -6.34217300 | 4.11588000  |
| H | 3.46906900  | -7.23117800 | 1.35633500  |
| H | 2.91034500  | -5.89109800 | 2.35312700  |
| H | 2.79107800  | -8.00112000 | 3.65134600  |
| H | 1.80392900  | -8.74829700 | 2.39780200  |
| C | -1.74200300 | -6.02607900 | -0.06602600 |
| C | -3.07833800 | -5.61816500 | -0.64353800 |
| C | -1.54900500 | -7.52342700 | -0.26878800 |
| C | -4.22610800 | -6.47390600 | -0.05715600 |
| H | -3.08349200 | -5.72899000 | -1.74019500 |
| H | -3.31871800 | -4.59380900 | -0.41284100 |
| C | -2.67845700 | -8.40867700 | 0.28592100  |
| H | -1.53527900 | -7.66414200 | -1.36332000 |
| H | -0.58183700 | -7.87357800 | 0.07760000  |
| C | -4.02800400 | -7.97148900 | -0.28554400 |
| H | -5.17458700 | -6.13646900 | -0.49374200 |
| H | -4.28523200 | -6.27768500 | 1.02264500  |
| H | -2.47524300 | -9.45968100 | 0.04442300  |
| H | -2.70254600 | -8.32968300 | 1.38030000  |
| H | -4.84768100 | -8.54209200 | 0.16849900  |
| H | -4.05310500 | -8.18247400 | -1.36472600 |

**(R<sub>a</sub>)-1a**

E = -910.158240461 a.u.

0 1

|   |            |             |            |
|---|------------|-------------|------------|
| C | 1.31123000 | -2.64176200 | 0.12779000 |
| C | 0.13514400 | -1.85664300 | 0.19446100 |
| C | 0.25809100 | -0.45935500 | 0.23332100 |

|   |             |             |             |
|---|-------------|-------------|-------------|
| C | 1.52167600  | 0.10635100  | 0.20623200  |
| C | 2.67740600  | -0.69530200 | 0.13943200  |
| C | 2.59016700  | -2.07735900 | 0.09847100  |
| C | -0.44729800 | -4.04260100 | 0.13850300  |
| C | -0.96659900 | -2.77465500 | 0.19940800  |
| H | -0.62735600 | 0.16748100  | 0.28420100  |
| H | 1.62756800  | 1.18614200  | 0.23718100  |
| H | 3.65389700  | -0.22175400 | 0.12072300  |
| H | 3.48088500  | -2.69666300 | 0.04935200  |
| H | -2.02010900 | -2.53481900 | 0.23143000  |
| N | 0.93781300  | -3.96590000 | 0.09500700  |
| C | 1.86544200  | -5.06711700 | -0.01382500 |
| H | 2.50367100  | -4.94042800 | -0.89479000 |
| H | 2.50037900  | -5.13313500 | 0.87664000  |
| H | 1.29870300  | -5.99333500 | -0.11889500 |
| C | -1.15833500 | -5.34708200 | 0.16855000  |
| C | -1.55415700 | -5.84538000 | 1.55133600  |
| C | -0.47851200 | -5.56693300 | 2.61393400  |
| C | -2.89520700 | -5.23138000 | 1.99032800  |
| H | -1.68507600 | -6.93451200 | 1.51026100  |
| C | -0.90795000 | -6.08775000 | 3.98768600  |
| H | -0.30426200 | -4.48405500 | 2.67455300  |
| H | 0.47152000  | -6.02741000 | 2.31465100  |
| C | -3.32518800 | -5.73698800 | 3.36917500  |
| H | -2.78258200 | -4.13823000 | 2.01719000  |
| H | -3.66192700 | -5.45627200 | 1.23860400  |
| C | -2.24182200 | -5.47278400 | 4.41677900  |
| H | -0.13167300 | -5.87123500 | 4.72963300  |
| H | -1.01202400 | -7.18126200 | 3.94678700  |
| H | -4.26876300 | -5.26607300 | 3.66611500  |
| H | -3.51419600 | -6.81841300 | 3.31259900  |
| H | -2.54885100 | -5.86732800 | 5.39156100  |
| H | -2.11423400 | -4.38811200 | 4.53651000  |
| C | -1.46599300 | -5.97120100 | -0.98259900 |
| C | -1.08692400 | -5.42111600 | -2.33890400 |
| C | -2.30156700 | -7.22593200 | -1.08408300 |
| C | -2.34621600 | -5.13726000 | -3.17323400 |
| H | -0.48115100 | -6.17359800 | -2.86665600 |
| H | -0.48088100 | -4.51644100 | -2.24592900 |
| C | -3.56827600 | -6.94760100 | -1.91339000 |
| H | -1.71700000 | -8.00517400 | -1.59525900 |
| H | -2.58096300 | -7.62089600 | -0.10517400 |
| C | -3.21787300 | -6.38821200 | -3.29323200 |
| H | -2.06209200 | -4.76927300 | -4.16488600 |

|   |             |             |             |
|---|-------------|-------------|-------------|
| H | -2.91561800 | -4.33746500 | -2.68175400 |
| H | -4.15724700 | -7.86626700 | -2.00885200 |
| H | -4.18905000 | -6.21980900 | -1.37408900 |
| H | -4.13125400 | -6.16584800 | -3.85562100 |
| H | -2.67194000 | -7.15379000 | -3.86252600 |

**3aa**

E = -1715.50808024 a.u.

0 1

|   |             |             |             |
|---|-------------|-------------|-------------|
| C | 0.35053400  | -2.30812000 | -1.69053800 |
| C | -0.89869800 | -1.84472800 | -1.20423600 |
| C | -1.23604700 | -0.49381900 | -1.40592100 |
| C | -0.34121300 | 0.33224400  | -2.06569200 |
| C | 0.89433800  | -0.15182800 | -2.53564500 |
| C | 1.25723100  | -1.47615300 | -2.35444700 |
| C | -0.68994900 | -4.04527000 | -0.72398000 |
| C | -1.54109700 | -2.97567400 | -0.59135500 |
| H | -2.18198500 | -0.10276800 | -1.04505700 |
| H | -0.59538000 | 1.37578400  | -2.22324000 |
| H | 1.57257700  | 0.52273900  | -3.04882700 |
| H | 2.20799800  | -1.85496600 | -2.71787300 |
| N | 0.45974600  | -3.64485500 | -1.39089600 |
| C | 1.60192000  | -4.45853300 | -1.73369200 |
| H | 1.44763100  | -5.46473200 | -1.34259700 |
| H | 1.72282900  | -4.51592800 | -2.82140700 |
| H | 2.51577400  | -4.03971300 | -1.29873300 |
| C | -0.88823200 | -5.43266600 | -0.23092900 |
| C | -0.83053800 | -5.55187500 | 1.29120200  |
| C | -2.03112900 | -6.24628900 | 1.96100600  |
| C | 0.49534700  | -6.14658200 | 1.79801000  |
| H | -0.85483500 | -4.51679500 | 1.65994500  |
| C | -1.93479100 | -6.09046700 | 3.48102000  |
| H | -2.05611100 | -7.31600600 | 1.72120100  |
| H | -2.96675900 | -5.81643700 | 1.58506300  |
| C | 0.58795700  | -6.04260200 | 3.32351600  |
| H | 0.57344200  | -7.19929900 | 1.49260100  |
| H | 1.33679000  | -5.61837200 | 1.33227500  |
| C | -0.62390000 | -6.68368900 | 4.00540600  |
| H | -2.79090700 | -6.57102000 | 3.96847400  |
| H | -1.98172700 | -5.02099400 | 3.73001600  |
| H | 1.51576200  | -6.50336900 | 3.68098800  |
| H | 0.63268200  | -4.98008400 | 3.60096300  |
| H | -0.55412900 | -6.56245100 | 5.09228000  |
| H | -0.61750400 | -7.76482400 | 3.80585800  |



|   |             |             |             |
|---|-------------|-------------|-------------|
| C | -1.08451400 | -6.43052700 | -1.11316900 |
| C | -1.29903100 | -6.18196400 | -2.59007800 |
| C | -1.23638900 | -7.89218900 | -0.76549200 |
| C | -2.70507500 | -6.66902600 | -2.98516600 |
| H | -0.54818700 | -6.73909000 | -3.17138500 |
| H | -1.19499200 | -5.12210900 | -2.83877400 |
| C | -2.64601600 | -8.38098200 | -1.13605500 |
| H | -0.50843700 | -8.46090200 | -1.36394500 |
| H | -1.00857800 | -8.09782500 | 0.28007400  |
| C | -2.92016800 | -8.13872100 | -2.62220700 |
| H | -2.86790900 | -6.50710100 | -4.05659900 |
| H | -3.44110800 | -6.05498300 | -2.45261700 |
| H | -2.75498300 | -9.44311800 | -0.88963400 |
| H | -3.37925900 | -7.82543400 | -0.53460600 |
| H | -3.94199900 | -8.44313300 | -2.87504200 |
| H | -2.24294200 | -8.76806100 | -3.21725000 |
| C | -2.92450400 | -3.10911100 | -0.00231800 |
| H | -2.86010800 | -3.87131100 | 0.78150400  |
| C | -3.38130300 | -1.83734000 | 0.69601200  |
| C | -4.39978000 | -1.02941600 | 0.21650200  |
| C | -2.71725000 | -1.44914200 | 1.87316600  |
| C | -4.75304600 | 0.16274600  | 0.86190200  |
| H | -4.94014200 | -1.30204900 | -0.68453400 |
| C | -3.05886100 | -0.26890500 | 2.51291700  |
| C | -4.07474700 | 0.55047400  | 2.01171000  |
| H | -2.53402200 | 0.02504000  | 3.41922700  |
| H | -4.31885100 | 1.46822500  | 2.53276600  |
| C | -3.92846100 | -3.61564300 | -1.02525700 |
| C | -4.97887300 | -4.45379400 | -0.60849700 |
| C | -3.85252600 | -3.27163100 | -2.37142800 |
| C | -5.90531900 | -4.94677400 | -1.52833100 |
| C | -4.78657700 | -3.73986100 | -3.29683600 |
| H | -3.03856900 | -2.62820800 | -2.69556000 |
| C | -5.80555600 | -4.58126300 | -2.87138100 |
| H | -6.70670300 | -5.60326100 | -1.21032600 |
| H | -4.70781400 | -3.45484300 | -4.34065700 |
| H | -6.53357300 | -4.96402700 | -3.57991400 |
| O | -5.01702100 | -4.73317000 | 0.72469800  |
| C | -5.98302400 | -5.65165900 | 1.17953800  |
| H | -5.87438400 | -6.62316200 | 0.68115200  |
| H | -5.80642100 | -5.77034100 | 2.24890000  |
| H | -6.99992900 | -5.27430300 | 1.01805400  |
| O | -1.74373700 | -2.28805000 | 2.34652400  |
| H | -1.32283400 | -1.87780900 | 3.11488100  |

|   |             |            |            |
|---|-------------|------------|------------|
| O | -5.76788900 | 0.86853100 | 0.28465700 |
| C | -6.13812600 | 2.07659300 | 0.90210100 |
| H | -5.30280300 | 2.78841400 | 0.92414000 |
| H | -6.94918400 | 2.49075000 | 0.30286200 |
| H | -6.49237600 | 1.91118600 | 1.92782200 |

**TS-3aa**

E = -1715.44894162 a.u.

0 1

|   |             |             |             |
|---|-------------|-------------|-------------|
| C | 0.03326600  | -2.03414900 | 0.13143100  |
| C | -1.19153400 | -1.90001900 | -0.53472100 |
| C | -1.47494700 | -0.68899300 | -1.19039500 |
| C | -0.55723500 | 0.34619300  | -1.11817100 |
| C | 0.64097900  | 0.20530400  | -0.39665100 |
| C | 0.95123500  | -0.98613100 | 0.23973400  |
| C | -1.04269100 | -4.04790700 | 0.24914900  |
| C | -1.90346400 | -3.15043400 | -0.38363900 |
| H | -2.39343500 | -0.56274800 | -1.75167000 |
| H | -0.76733600 | 1.28250600  | -1.62519400 |
| H | 1.34081300  | 1.03396900  | -0.35182000 |
| H | 1.88922100  | -1.11126800 | 0.77230700  |
| N | 0.11830100  | -3.31227900 | 0.63807700  |
| C | 0.75144400  | -3.46199300 | 1.94750800  |
| H | 1.74462000  | -3.91939200 | 1.89842300  |
| H | 0.84588600  | -2.47343800 | 2.40250400  |
| H | 0.11323900  | -4.06445800 | 2.59328100  |
| C | -0.98232200 | -5.53768700 | 0.49818100  |
| C | 0.45496600  | -6.09109600 | 0.72532100  |
| C | 0.87261600  | -6.63716200 | 2.11034000  |
| C | 0.84798800  | -7.10000900 | -0.37754700 |
| H | 1.12919500  | -5.25720600 | 0.52680100  |
| C | 2.38122100  | -6.90811000 | 2.14159400  |
| H | 0.36413800  | -7.57806700 | 2.34034200  |
| H | 0.59490300  | -5.94947000 | 2.91326200  |
| C | 2.35020900  | -7.39637500 | -0.33235000 |
| H | 0.29392500  | -8.03978200 | -0.27395100 |
| H | 0.57475700  | -6.67969400 | -1.35140400 |
| C | 2.78053700  | -7.90001900 | 1.04681500  |
| H | 2.67373400  | -7.28824000 | 3.12687500  |
| H | 2.92809500  | -5.96602800 | 1.98989600  |
| H | 2.61237700  | -8.12853800 | -1.10431000 |
| H | 2.90524200  | -6.47715600 | -0.56692300 |
| H | 3.86113900  | -8.07952600 | 1.06909500  |
| H | 2.29336800  | -8.86510300 | 1.24625200  |

|   |             |             |             |
|---|-------------|-------------|-------------|
| C | -1.98052200 | -6.44790900 | 0.33458900  |
| C | -3.32569800 | -6.28929100 | -0.32613800 |
| C | -1.94404100 | -7.85060600 | 0.91460900  |
| C | -4.44890500 | -6.27388400 | 0.72291800  |
| H | -3.46913700 | -7.18784300 | -0.94442400 |
| H | -3.35565300 | -5.46600000 | -1.02678300 |
| C | -3.01758000 | -7.91803400 | 2.02360200  |
| H | -2.19128800 | -8.58547400 | 0.13575500  |
| H | -0.98750500 | -8.14036900 | 1.33323000  |
| C | -4.42009400 | -7.59522500 | 1.49862800  |
| H | -5.42066800 | -6.12762700 | 0.23906900  |
| H | -4.29449300 | -5.42784400 | 1.40587700  |
| H | -3.00778200 | -8.91281000 | 2.48394800  |
| H | -2.74198500 | -7.19676500 | 2.80434000  |
| H | -5.13622800 | -7.57381700 | 2.32777500  |
| H | -4.73820000 | -8.40389000 | 0.82586400  |
| C | -3.38485800 | -3.20859600 | -0.71505100 |
| H | -3.82512900 | -4.01432000 | -0.13325400 |
| C | -4.11691300 | -1.98284700 | -0.15863000 |
| C | -4.78253600 | -1.06091400 | -0.95001700 |
| C | -4.16763300 | -1.81700700 | 1.23674300  |
| C | -5.45912500 | 0.03221800  | -0.39691200 |
| H | -4.78611900 | -1.16507300 | -2.03125200 |
| C | -4.83358400 | -0.73510000 | 1.79083400  |
| C | -5.48148400 | 0.20212500  | 0.98227500  |
| H | -4.85790200 | -0.61525900 | 2.87189100  |
| H | -5.99266500 | 1.03774100  | 1.44460600  |
| C | -3.69838200 | -3.45039200 | -2.18103100 |
| C | -4.98268200 | -3.91407100 | -2.52932400 |
| C | -2.77669900 | -3.23881600 | -3.19945200 |
| C | -5.32623600 | -4.13570400 | -3.86081700 |
| C | -3.11012800 | -3.45561700 | -4.53843800 |
| H | -1.77878100 | -2.90087400 | -2.93720000 |
| C | -4.38300100 | -3.89967100 | -4.86271700 |
| H | -6.31453200 | -4.49076800 | -4.12776300 |
| H | -2.37410700 | -3.27911600 | -5.31549000 |
| H | -4.65677800 | -4.07250800 | -5.89891500 |
| O | -5.82495300 | -4.12782400 | -1.48129900 |
| C | -7.13227000 | -4.56726000 | -1.76713800 |
| H | -7.12495500 | -5.54093900 | -2.27268700 |
| H | -7.63647300 | -4.66148100 | -0.80524800 |
| H | -7.66746200 | -3.84051200 | -2.38989500 |
| O | -3.55521600 | -2.76994300 | 2.00634100  |
| H | -3.69095100 | -2.54804300 | 2.93810900  |

|   |             |            |             |
|---|-------------|------------|-------------|
| O | -6.06187400 | 0.86830200 | -1.29234700 |
| C | -6.73351100 | 1.98680400 | -0.76801100 |
| H | -6.05023200 | 2.64001000 | -0.21005000 |
| H | -7.13574900 | 2.53139800 | -1.62253100 |
| H | -7.55802800 | 1.68752900 | -0.10782200 |

**ent-4aa**

E = -1715.50489283 a.u.

0 1

|   |             |             |             |
|---|-------------|-------------|-------------|
| C | -0.43604100 | -1.92984500 | 1.61506800  |
| C | -1.50688200 | -1.62576000 | 0.73762400  |
| C | -1.78236900 | -0.27173100 | 0.46962000  |
| C | -1.00750100 | 0.70660000  | 1.07047100  |
| C | 0.04673500  | 0.37638600  | 1.94184500  |
| C | 0.34715000  | -0.94530100 | 2.22523300  |
| C | -1.33789700 | -3.87380100 | 0.94140800  |
| C | -2.07061000 | -2.88742900 | 0.32605400  |
| H | -2.58968300 | 0.00763700  | -0.19860000 |
| H | -1.21644500 | 1.75166300  | 0.86397600  |
| H | 0.63618700  | 1.16792400  | 2.39401800  |
| H | 1.16695200  | -1.20687200 | 2.88769100  |
| N | -0.34972100 | -3.29692900 | 1.72739600  |
| C | 0.55797700  | -3.98187200 | 2.61650100  |
| H | 1.57822300  | -4.00492600 | 2.21563100  |
| H | 0.57267300  | -3.47857100 | 3.58837100  |
| H | 0.20627000  | -5.00521900 | 2.75860500  |
| C | -1.43652300 | -5.35288500 | 0.80287400  |
| C | -0.46921600 | -5.95324000 | -0.22416500 |
| C | 0.61256100  | -6.86794900 | 0.38508300  |
| C | -1.15611600 | -6.64809600 | -1.41603600 |
| H | 0.06879000  | -5.09686500 | -0.65894700 |
| C | 1.62641100  | -7.30884600 | -0.67527600 |
| H | 0.14833500  | -7.75696800 | 0.83124800  |
| H | 1.13026200  | -6.34634600 | 1.19763100  |
| C | -0.12651800 | -7.07081300 | -2.46607500 |
| H | -1.70416600 | -7.53569900 | -1.07682500 |
| H | -1.89099700 | -5.97232200 | -1.86109400 |
| C | 0.93692900  | -7.98842400 | -1.86009100 |
| H | 2.37031000  | -7.97750600 | -0.22753500 |
| H | 2.17049900  | -6.42536600 | -1.03756800 |
| H | -0.63048900 | -7.56205700 | -3.30620900 |
| H | 0.35537800  | -6.17059100 | -2.87222500 |
| H | 1.67628800  | -8.27506400 | -2.61630200 |
| H | 0.45885000  | -8.91629500 | -1.51439800 |

|   |             |             |             |
|---|-------------|-------------|-------------|
| C | -2.32061200 | -6.02735100 | 1.56248800  |
| C | -3.20574500 | -5.34336000 | 2.58215000  |
| C | -2.50107900 | -7.52795500 | 1.57554100  |
| C | -2.92933400 | -5.89273600 | 3.99109500  |
| H | -4.25636100 | -5.54745500 | 2.32580000  |
| H | -3.08230400 | -4.25882800 | 2.55149900  |
| C | -2.20741700 | -8.08494400 | 2.97896000  |
| H | -3.54689700 | -7.75600500 | 1.32132500  |
| H | -1.87767600 | -8.03065900 | 0.83753000  |
| C | -3.08551500 | -7.41345000 | 4.03582800  |
| H | -3.60019200 | -5.41717800 | 4.71514800  |
| H | -1.90439100 | -5.62469800 | 4.28320900  |
| H | -2.35696600 | -9.17022300 | 2.98749300  |
| H | -1.14924900 | -7.90290100 | 3.21422100  |
| H | -2.84206900 | -7.79590100 | 5.03330300  |
| H | -4.13625200 | -7.67163000 | 3.84295900  |
| C | -3.22615300 | -3.16206500 | -0.60824000 |
| H | -3.76102300 | -4.03200200 | -0.20204300 |
| C | -4.22647900 | -2.01467600 | -0.61829800 |
| C | -4.43224500 | -1.20408700 | -1.72294400 |
| C | -4.94045400 | -1.73248700 | 0.55906900  |
| C | -5.30993700 | -0.11374000 | -1.67886300 |
| H | -3.89816000 | -1.39140400 | -2.64919400 |
| C | -5.80450000 | -0.65035600 | 0.61151600  |
| C | -5.99444800 | 0.17171500  | -0.50290100 |
| H | -6.34345000 | -0.43549700 | 1.53164000  |
| H | -6.67533500 | 1.01117900  | -0.43120900 |
| C | -2.77119000 | -3.55018000 | -2.00544600 |
| C | -3.66479000 | -4.24880500 | -2.84053900 |
| C | -1.49529600 | -3.27822500 | -2.48415900 |
| C | -3.26426600 | -4.69100000 | -4.10078000 |
| C | -1.08557700 | -3.70799600 | -3.74847600 |
| H | -0.80787800 | -2.73368200 | -1.84303000 |
| C | -1.96853500 | -4.42213700 | -4.54588200 |
| H | -3.94465700 | -5.24416500 | -4.73728800 |
| H | -0.08222000 | -3.48857200 | -4.09869600 |
| H | -1.66155100 | -4.77360700 | -5.52613400 |
| O | -4.90188300 | -4.46425700 | -2.31825400 |
| C | -5.83962200 | -5.15093100 | -3.11316100 |
| H | -5.49786100 | -6.16688000 | -3.34703900 |
| H | -6.75521000 | -5.20270600 | -2.52431500 |
| H | -6.03778200 | -4.61338700 | -4.04833000 |
| O | -4.73966500 | -2.56519700 | 1.62533500  |
| H | -5.23429300 | -2.22639300 | 2.38447000  |

|   |             |            |             |
|---|-------------|------------|-------------|
| O | -5.41974700 | 0.60430900 | -2.83430800 |
| C | -6.27352800 | 1.72134300 | -2.81304700 |
| H | -5.94879300 | 2.46057100 | -2.06934600 |
| H | -6.22333500 | 2.16451500 | -3.80782000 |
| H | -7.30995800 | 1.43103600 | -2.59702700 |

**4aa**

E = -1715.50954315 a.u.

0 1

|   |             |             |              |
|---|-------------|-------------|--------------|
| C | -0.99307000 | 14.81870600 | -9.16806500  |
| C | 0.27693900  | 14.58836700 | -8.69693500  |
| N | -1.70379500 | 13.62775600 | -9.18798000  |
| C | -3.09318300 | 13.47146300 | -9.54334200  |
| H | -3.58289600 | 14.44537000 | -9.48024100  |
| H | -3.21365800 | 13.07574800 | -10.55939600 |
| H | -3.57895800 | 12.78934500 | -8.83939000  |
| C | -1.55940900 | 16.10404600 | -9.65207900  |
| C | -1.93156000 | 17.04404400 | -8.76044400  |
| C | -2.37310400 | 18.43986900 | -9.14433200  |
| C | -1.96761500 | 16.79497300 | -7.26750200  |
| C | -1.63644500 | 19.51402600 | -8.32688100  |
| H | -3.45265200 | 18.53631300 | -8.94819000  |
| H | -2.22852600 | 18.62882200 | -10.21100800 |
| C | -1.23806700 | 17.88525600 | -6.47057800  |
| H | -3.02485800 | 16.79737000 | -6.95525600  |
| H | -1.55293900 | 15.81185700 | -7.03345000  |
| C | -1.77369100 | 19.27132900 | -6.82497800  |
| H | -0.57223400 | 19.48636800 | -8.58989100  |
| H | -1.34589300 | 17.68969000 | -5.39687400  |
| H | -0.16490700 | 17.83987700 | -6.69288600  |
| H | -1.23900600 | 20.04602000 | -6.26440200  |
| H | -2.83291700 | 19.34074500 | -6.53803400  |
| C | -1.62744300 | 16.33077900 | -11.16676700 |
| C | -0.90615800 | 15.26034400 | -11.99902500 |
| C | -3.07565600 | 16.45565400 | -11.68085500 |
| H | -1.11770100 | 17.28551400 | -11.37685500 |
| C | -0.91727600 | 15.62558400 | -13.48460700 |
| H | -1.41012800 | 14.29211200 | -11.85857100 |
| H | 0.12125600  | 15.12910900 | -11.65303000 |
| C | -3.10808700 | 16.83003400 | -13.16494800 |
| H | -3.57916200 | 15.48780700 | -11.54676200 |
| H | -3.63835300 | 17.18501200 | -11.08899300 |
| C | -2.34352500 | 15.80658100 | -14.00778700 |
| H | -0.39017300 | 14.85722400 | -14.06200300 |

|   |             |             |              |
|---|-------------|-------------|--------------|
| H | -0.35591800 | 16.56134200 | -13.62077000 |
| H | -4.14405500 | 16.91520000 | -13.51194200 |
| H | -2.64812500 | 17.82054600 | -13.29336900 |
| H | -2.33458000 | 16.10814900 | -15.06127600 |
| H | -2.86789800 | 14.84182500 | -13.95755900 |
| C | 0.37545800  | 13.18057900 | -8.41907100  |
| C | -0.88723600 | 12.61784100 | -8.73813200  |
| C | 1.38434900  | 12.32926000 | -7.93089500  |
| C | -1.16518700 | 11.25641300 | -8.58287000  |
| C | 1.11120900  | 10.97993100 | -7.77688800  |
| H | 2.36523800  | 12.72051700 | -7.67838800  |
| C | -0.15128700 | 10.44717500 | -8.09740000  |
| H | -2.13577600 | 10.84501500 | -8.84375500  |
| H | 1.88647000  | 10.31832700 | -7.40333700  |
| H | -0.33170700 | 9.38450100  | -7.96859500  |
| C | 1.90002300  | 15.94481100 | -9.96495600  |
| C | 2.50163700  | 14.92695800 | -10.69771800 |
| C | 2.91180800  | 15.11352200 | -12.01995800 |
| C | 2.69886300  | 16.34639700 | -12.63447000 |
| C | 2.09608600  | 17.37345200 | -11.90836600 |
| C | 1.70790000  | 17.18767200 | -10.58635700 |
| H | 2.62505700  | 13.94156600 | -10.25482500 |
| H | 2.98626900  | 16.52441000 | -13.66365000 |
| H | 1.92426500  | 18.33474400 | -12.38854300 |
| O | 3.49018700  | 14.03804700 | -12.62432800 |
| O | 1.10287200  | 18.18657700 | -9.86821200  |
| C | 3.83101200  | 14.17301200 | -13.98265200 |
| H | 4.58547600  | 14.95600200 | -14.13255200 |
| H | 4.24341200  | 13.21235600 | -14.29106100 |
| H | 2.94926600  | 14.40428300 | -14.59442700 |
| C | 2.37650000  | 15.37067400 | -7.51633700  |
| C | 1.93944600  | 15.18843900 | -6.18786500  |
| C | 3.73772600  | 15.25579000 | -7.77310500  |
| C | 2.83645200  | 14.84907200 | -5.17806700  |
| C | 4.64877600  | 14.92687300 | -6.76596400  |
| H | 4.09830800  | 15.41594500 | -8.78321400  |
| C | 4.19343000  | 14.71346400 | -5.47462400  |
| H | 2.49174600  | 14.69279600 | -4.16290900  |
| H | 5.70411100  | 14.83648200 | -7.00063000  |
| H | 4.88660600  | 14.44736900 | -4.68270000  |
| O | 0.60754000  | 15.36795200 | -5.97776000  |
| C | 0.08747600  | 15.04634800 | -4.70959900  |
| H | 0.48924600  | 15.70696700 | -3.93117300  |
| H | -0.99186600 | 15.18934900 | -4.78123000  |

|   |             |             |              |
|---|-------------|-------------|--------------|
| H | 0.30135400  | 14.00274900 | -4.44979400  |
| C | 1.33120200  | 15.67269000 | -8.58250300  |
| H | 0.80641000  | 16.58051100 | -8.26673200  |
| H | 1.03638300  | 18.97381900 | -10.42683700 |
| H | -2.02009100 | 20.50426800 | -8.59736800  |

**TS-4aa**

E = -1715.43497145 a.u.

0 1

|   |             |             |              |
|---|-------------|-------------|--------------|
| C | -0.69605300 | 14.98671700 | -9.69351800  |
| C | 0.39699600  | 14.70050500 | -8.87231300  |
| N | -1.08796900 | 13.77001200 | -10.33103700 |
| C | -1.23701100 | 13.71306800 | -11.78769200 |
| H | -1.02073200 | 14.69085500 | -12.21499800 |
| H | -0.50787800 | 13.00496700 | -12.19117400 |
| H | -2.23641700 | 13.39632600 | -12.09955200 |
| C | -1.56503200 | 16.17443100 | -9.98433000  |
| C | -1.41640000 | 17.43573200 | -9.48392600  |
| C | -2.09188500 | 18.64959900 | -10.10653300 |
| C | -0.66649400 | 17.90002400 | -8.26395500  |
| C | -1.00032200 | 19.66546200 | -10.50640000 |
| H | -2.76956700 | 19.12413400 | -9.38067400  |
| H | -2.67753500 | 18.42183700 | -10.99680300 |
| C | 0.46945700  | 18.87370800 | -8.61781700  |
| H | -1.40418600 | 18.47438400 | -7.67977300  |
| H | -0.38429200 | 17.07694200 | -7.61613600  |
| C | -0.12732100 | 20.09186900 | -9.32519100  |
| H | -0.36756700 | 19.20012600 | -11.27378400 |
| H | 1.01951700  | 19.16882700 | -7.71809600  |
| H | 1.18780500  | 18.37728600 | -9.28323800  |
| H | 0.66385400  | 20.76817400 | -9.66778100  |
| H | -0.74187800 | 20.65601600 | -8.60971600  |
| C | -2.94602600 | 15.98616600 | -10.69810400 |
| C | -3.11457500 | 16.18618300 | -12.22173900 |
| C | -3.79240800 | 14.79652200 | -10.19400600 |
| H | -3.51793200 | 16.82324200 | -10.28826600 |
| C | -4.59215300 | 16.45301700 | -12.53125300 |
| H | -2.81474500 | 15.31081300 | -12.79950000 |
| H | -2.48816000 | 17.01825100 | -12.56528600 |
| C | -5.26706500 | 15.04367300 | -10.53709400 |
| H | -3.48370000 | 13.84324700 | -10.62674400 |
| H | -3.66429000 | 14.69873200 | -9.10975900  |
| C | -5.46085500 | 15.29257600 | -12.03595700 |



|   |             |             |              |
|---|-------------|-------------|--------------|
| H | -4.73289400 | 16.60032000 | -13.60785700 |
| H | -4.91062300 | 17.38286700 | -12.03793300 |
| H | -5.87394900 | 14.18986700 | -10.21521000 |
| H | -5.63003800 | 15.91814700 | -9.97898300  |
| H | -6.51682600 | 15.48443700 | -12.25657400 |
| H | -5.18228200 | 14.38286800 | -12.58750100 |
| C | 0.56161700  | 13.25539000 | -8.86382200  |
| C | -0.36124200 | 12.73261000 | -9.78192500  |
| C | 1.42777100  | 12.35700600 | -8.21113700  |
| C | -0.42894000 | 11.37719000 | -10.10808600 |
| C | 1.34474500  | 11.00380200 | -8.50275200  |
| H | 2.15558400  | 12.69905600 | -7.48752300  |
| C | 0.42957600  | 10.51320500 | -9.44699900  |
| H | -1.14608600 | 11.01411800 | -10.83826300 |
| H | 2.00721500  | 10.31130900 | -7.99309300  |
| H | 0.39004700  | 9.44909300  | -9.65790700  |
| C | 2.64211400  | 15.75684900 | -9.27287000  |
| C | 2.83490300  | 14.96837600 | -10.39684900 |
| C | 3.88883400  | 15.20522600 | -11.28869000 |
| C | 4.77202300  | 16.25233500 | -11.05510600 |
| C | 4.58948900  | 17.05364900 | -9.92490000  |
| C | 3.54500300  | 16.81535200 | -9.04603800  |
| H | 2.16521300  | 14.14388000 | -10.61522800 |
| H | 5.59545300  | 16.46303800 | -11.72661300 |
| H | 5.27604400  | 17.87571200 | -9.73458200  |
| O | 3.95803100  | 14.35673900 | -12.35470300 |
| O | 3.34334900  | 17.57462600 | -7.92538000  |
| C | 5.01390100  | 14.55456400 | -13.26210800 |
| H | 5.98994800  | 14.44652700 | -12.77163200 |
| H | 4.90807500  | 13.78559200 | -14.02754300 |
| H | 4.95931500  | 15.54489700 | -13.73266900 |
| C | 1.97222100  | 15.09122300 | -6.90917700  |
| C | 1.02990300  | 14.95811300 | -5.87275800  |
| C | 3.29348900  | 14.76016400 | -6.63108100  |
| C | 1.40093200  | 14.46773600 | -4.62203800  |
| C | 3.68135500  | 14.27895700 | -5.37979400  |
| H | 4.03369700  | 14.85037000 | -7.42006600  |
| C | 2.73113700  | 14.12638700 | -4.38068400  |
| H | 0.66568900  | 14.35268900 | -3.83444500  |
| H | 4.71898900  | 14.01971200 | -5.19738200  |
| H | 3.01421900  | 13.74567000 | -3.40429600  |
| O | -0.24104700 | 15.33397500 | -6.18248600  |
| C | -1.25976400 | 15.08870100 | -5.24212000  |
| H | -1.10933600 | 15.67224400 | -4.32542400  |

|   |             |             |              |
|---|-------------|-------------|--------------|
| H | -2.18952300 | 15.39769800 | -5.72058700  |
| H | -1.31494700 | 14.02345900 | -4.98883800  |
| C | 1.49239700  | 15.57341000 | -8.28150900  |
| H | 1.13738700  | 16.58234500 | -8.11627400  |
| H | 4.00506700  | 18.27982300 | -7.89897500  |
| H | -1.47342800 | 20.54036200 | -10.96651900 |

**ent-3aa**

E = -1715.50576803 a.u.

0 1

|   |             |             |              |
|---|-------------|-------------|--------------|
| C | -0.51951300 | 14.95753700 | -10.26463900 |
| C | 0.52086000  | 14.49304700 | -9.48756900  |
| N | -0.87233400 | 13.98988800 | -11.19516400 |
| C | -1.76866100 | 14.17067400 | -12.31212000 |
| H | -1.32401500 | 13.73124900 | -13.20982100 |
| H | -2.74668000 | 13.70493700 | -12.13830900 |
| H | -1.90903200 | 15.24029000 | -12.48108800 |
| C | -1.29742300 | 16.20914500 | -10.10387700 |
| C | -0.70951900 | 17.40562800 | -10.30412400 |
| C | -1.36135700 | 18.73502900 | -9.99561400  |
| C | 0.67275700  | 17.57334700 | -10.89154500 |
| C | -1.42360800 | 19.62683900 | -11.24595700 |
| H | -0.73745300 | 19.24284700 | -9.24427300  |
| H | -2.35438100 | 18.62310100 | -9.55546900  |
| C | 0.61835100  | 18.46021100 | -12.14669600 |
| H | 1.32574700  | 18.05358100 | -10.14606700 |
| H | 1.12340300  | 16.60741000 | -11.12897200 |
| C | -0.03130900 | 19.81237600 | -11.85163100 |
| H | -2.08165700 | 19.15630400 | -11.98939600 |
| H | 1.62963800  | 18.59733900 | -12.54410300 |
| H | 0.03624100  | 17.94071500 | -12.92031200 |
| H | -0.08963300 | 20.41757800 | -12.76309500 |
| H | 0.59762200  | 20.36587100 | -11.14035200 |
| C | -2.73676300 | 16.08223800 | -9.58388400  |
| C | -3.79168000 | 16.54156300 | -10.61020400 |
| C | -3.10856800 | 14.68135500 | -9.07155300  |
| H | -2.81860700 | 16.75742800 | -8.71704900  |
| C | -5.19629200 | 16.54461200 | -10.00239500 |
| H | -3.78033000 | 15.85376100 | -11.46583400 |
| H | -3.54054500 | 17.53233900 | -11.00390200 |
| C | -4.51326100 | 14.67318800 | -8.46141700  |
| H | -3.08615400 | 13.96511900 | -9.90362000  |
| H | -2.36020600 | 14.34149900 | -8.34916900  |
| C | -5.56111800 | 15.15938300 | -9.46489700  |

|   |             |             |              |
|---|-------------|-------------|--------------|
| H | -5.93005400 | 16.87292000 | -10.74695000 |
| H | -5.23113200 | 17.27308400 | -9.17944400  |
| H | -4.76123700 | 13.66626000 | -8.10742600  |
| H | -4.53638600 | 15.33132600 | -7.58108900  |
| H | -6.55583900 | 15.17479700 | -9.00588200  |
| H | -5.60849700 | 14.45166600 | -10.30473900 |
| C | 0.80712600  | 13.15378100 | -9.93915000  |
| C | -0.07752400 | 12.88367800 | -11.01042400 |
| C | 1.72902700  | 12.16047300 | -9.56698400  |
| C | -0.06408800 | 11.67492800 | -11.71305000 |
| C | 1.74414400  | 10.95915400 | -10.25544100 |
| H | 2.41894200  | 12.33109500 | -8.74781000  |
| C | 0.85688100  | 10.71782200 | -11.32058600 |
| H | -0.75715700 | 11.48719800 | -12.52762500 |
| H | 2.45214800  | 10.18790200 | -9.96932400  |
| H | 0.89116500  | 9.76515200  | -11.83970000 |
| C | 2.60018000  | 15.78288200 | -8.78746400  |
| C | 3.35463000  | 15.25541700 | -9.82340400  |
| C | 4.63187000  | 15.74932800 | -10.12374800 |
| C | 5.16363000  | 16.79203500 | -9.37482400  |
| C | 4.40721700  | 17.33508000 | -8.33146200  |
| C | 3.14612000  | 16.84272400 | -8.03793000  |
| H | 2.96551100  | 14.44728000 | -10.43399500 |
| H | 6.14694700  | 17.19657500 | -9.58187300  |
| H | 4.81444400  | 18.15789400 | -7.74781800  |
| O | 5.26742100  | 15.14192700 | -11.16684000 |
| O | 2.36691100  | 17.35800500 | -7.03866700  |
| C | 6.55311300  | 15.60899700 | -11.49189300 |
| H | 7.24954900  | 15.48497000 | -10.65244400 |
| H | 6.89359400  | 15.00727800 | -12.33474300 |
| H | 6.53412500  | 16.66677400 | -11.78506200 |
| C | 1.23496100  | 14.56365400 | -7.06715400  |
| C | 0.09094000  | 14.60729200 | -6.25083800  |
| C | 2.34355300  | 13.86584600 | -6.60390500  |
| C | 0.05772000  | 13.93476900 | -5.03073100  |
| C | 2.32463400  | 13.18750800 | -5.38403300  |
| H | 3.24717300  | 13.86457300 | -7.20821300  |
| C | 1.17785900  | 13.21974800 | -4.60507400  |
| H | -0.82783900 | 13.96094100 | -4.40687800  |
| H | 3.20284700  | 12.64490100 | -5.05014900  |
| H | 1.14346800  | 12.69637700 | -3.65458900  |
| O | -0.94690400 | 15.35271400 | -6.72914300  |
| C | -2.06789900 | 15.52190400 | -5.89497200  |
| H | -1.78133800 | 15.94775500 | -4.92568700  |

|   |             |             |              |
|---|-------------|-------------|--------------|
| H | -2.72998000 | 16.21625200 | -6.41404800  |
| H | -2.59613200 | 14.57327400 | -5.73295400  |
| C | 1.20993300  | 15.29177600 | -8.40811100  |
| H | 0.60089100  | 16.18964800 | -8.25306500  |
| H | 2.86590500  | 18.04416800 | -6.57427500  |
| H | -1.86610100 | 20.59618000 | -10.99134500 |

**1a**

E = -910.158267744 a.u.

0 1

|   |             |             |             |
|---|-------------|-------------|-------------|
| C | -1.41594400 | -1.73385600 | 0.37413000  |
| C | -2.62895500 | -2.36427900 | 0.74172800  |
| C | -3.68408800 | -1.57159500 | 1.21845400  |
| C | -3.50718200 | -0.20154400 | 1.31346900  |
| C | -2.29102300 | 0.40329600  | 0.94216400  |
| C | -1.22975100 | -0.35129900 | 0.46901200  |
| C | -1.16956800 | -3.94288000 | 0.03571000  |
| C | -2.44215400 | -3.76808600 | 0.51626200  |
| H | -4.62567800 | -2.02899100 | 1.50780300  |
| H | -4.31763800 | 0.42059000  | 1.67987300  |
| H | -2.18360000 | 1.48002100  | 1.02728300  |
| H | -0.29228600 | 0.11453600  | 0.18003000  |
| H | -3.15310800 | -4.56204500 | 0.69679700  |
| N | -0.54215900 | -2.70797100 | -0.05205800 |
| C | 0.81551000  | -2.45201300 | -0.47188300 |
| H | 0.83541700  | -1.85612600 | -1.39112200 |
| H | 1.35948000  | -1.91284600 | 0.31095900  |
| H | 1.31188500  | -3.40644600 | -0.65309800 |
| C | -0.50047300 | -5.19593100 | -0.40092200 |
| C | -0.82706000 | -5.65335600 | -1.81549200 |
| C | -2.13665000 | -6.46099300 | -1.84046000 |
| C | -0.91355300 | -4.48507300 | -2.81131000 |
| H | -0.02332800 | -6.31243200 | -2.16849800 |
| C | -2.47412100 | -6.94937900 | -3.25092400 |
| H | -2.94696900 | -5.81730100 | -1.46986100 |
| H | -2.05609000 | -7.30664400 | -1.14625900 |
| C | -1.23682000 | -4.98121800 | -4.22273000 |
| H | -1.69785500 | -3.78955700 | -2.48292200 |
| H | 0.02999500  | -3.92488000 | -2.81360300 |
| C | -2.54024800 | -5.78251100 | -4.23846700 |
| H | -3.42184200 | -7.49895200 | -3.24286400 |
| H | -1.70009100 | -7.65649800 | -3.58148000 |
| H | -1.30220700 | -4.13248900 | -4.91219200 |
| H | -0.41696900 | -5.61943400 | -4.58161300 |

|   |             |             |             |
|---|-------------|-------------|-------------|
| H | -2.75173800 | -6.14903600 | -5.24894700 |
| H | -3.37105100 | -5.12059500 | -3.95787200 |
| C | 0.27561900  | -5.87748100 | 0.46083500  |
| C | 0.88916300  | -7.22984600 | 0.18243700  |
| C | 0.54118600  | -5.40508900 | 1.87234000  |
| C | 0.35871300  | -8.26374400 | 1.19218900  |
| H | 1.98072500  | -7.15939500 | 0.29930500  |
| H | 0.69400700  | -7.57433100 | -0.83519700 |
| C | 0.01110100  | -6.42975000 | 2.88786500  |
| H | 1.62865500  | -5.30647700 | 2.01140100  |
| H | 0.09544500  | -4.42398000 | 2.05423100  |
| C | 0.60914200  | -7.81401500 | 2.63266100  |
| H | 0.82648800  | -9.23660600 | 1.00603300  |
| H | -0.72078500 | -8.38811200 | 1.03377000  |
| H | 0.23433800  | -6.09586000 | 3.90679300  |
| H | -1.08181200 | -6.47768800 | 2.79473300  |
| H | 0.19535500  | -8.54523500 | 3.33557700  |
| H | 1.69270700  | -7.77651800 | 2.81345400  |

## 2a

E = -881.702855497 a.u.

0 1

|   |             |             |             |
|---|-------------|-------------|-------------|
| C | -0.07949600 | -0.24517500 | 0.52573100  |
| C | 1.18647400  | -0.19781000 | -0.09006400 |
| C | 1.63399400  | 1.01662900  | -0.59137700 |
| C | 0.85074900  | 2.16918800  | -0.51177900 |
| C | -0.40089600 | 2.10253000  | 0.08119500  |
| C | -0.87194600 | 0.89902000  | 0.60641100  |
| H | 2.61500800  | 1.06639700  | -1.05104300 |
| H | 1.22100200  | 3.10668600  | -0.91277800 |
| H | -1.02408400 | 2.98912900  | 0.14806000  |
| H | -1.84748800 | 0.86648200  | 1.07634200  |
| O | -0.44124300 | -1.44984600 | 1.04136800  |
| C | -1.70282700 | -1.54716800 | 1.65777600  |
| H | -2.50947800 | -1.31472000 | 0.95215500  |
| H | -1.79938000 | -2.58131000 | 1.98842900  |
| H | -1.77961700 | -0.87886200 | 2.52465500  |
| C | 1.98341500  | -1.48665000 | -0.15588500 |
| H | 1.94597100  | -1.92880500 | 0.85179300  |
| C | 3.45120000  | -1.31443600 | -0.50330600 |
| C | 4.40739300  | -1.49194400 | 0.48603900  |
| C | 3.88576500  | -1.01985500 | -1.81020500 |
| C | 5.77678500  | -1.37796100 | 0.22504300  |
| H | 4.10159300  | -1.72770500 | 1.50153500  |

|   |            |             |             |
|---|------------|-------------|-------------|
| C | 5.24535200 | -0.91364700 | -2.07412500 |
| C | 6.19838700 | -1.09047800 | -1.06835600 |
| H | 5.57620100 | -0.68575900 | -3.08514200 |
| H | 7.24946900 | -1.00108900 | -1.31528400 |
| O | 1.31815300 | -2.34468200 | -1.06796200 |
| H | 1.78957500 | -3.19037000 | -1.06098300 |
| O | 2.94229600 | -0.82600400 | -2.77412100 |
| H | 3.38585600 | -0.59256800 | -3.60191700 |
| O | 6.60496500 | -1.57376600 | 1.28997700  |
| C | 7.98770500 | -1.46487200 | 1.05249800  |
| H | 8.25448600 | -0.46334900 | 0.69156500  |
| H | 8.47772300 | -1.64602500 | 2.00911700  |
| H | 8.32880200 | -2.21030800 | 0.32259600  |

### H<sub>2</sub>O

E = -76.3722218542 a.u.

|     |             |             |            |
|-----|-------------|-------------|------------|
| 0 1 |             |             |            |
| O   | -0.51818400 | -0.87003500 | 0.00000000 |
| H   | 0.44639500  | -0.82736300 | 0.00000000 |
| H   | -0.79994300 | 0.05346200  | 0.00000000 |

### (S)-7a

E = -2467.97465468 a.u.

|     |             |             |             |
|-----|-------------|-------------|-------------|
| 0 1 |             |             |             |
| P   | -0.64869900 | -0.65695400 | 0.83873500  |
| O   | 0.15376700  | -0.24908800 | 1.99298000  |
| O   | -0.69917600 | -2.20270000 | 0.40390600  |
| O   | -2.20644200 | -0.28625200 | 1.06660000  |
| O   | -0.24329800 | -0.07233500 | -0.58837300 |
| H   | -0.13530600 | 0.89702100  | -0.55248500 |
| C   | -3.10959000 | -4.26283400 | 2.26160800  |
| C   | -2.58586200 | -3.37649300 | 1.31190700  |
| C   | -1.22201000 | -3.12085500 | 1.31577400  |
| C   | -0.35082300 | -3.77559600 | 2.20215500  |
| C   | -0.89713900 | -4.75481200 | 3.03735700  |
| C   | -2.26996300 | -4.98358200 | 3.09731900  |
| C   | -4.62012900 | -4.25800700 | 2.21062800  |
| C   | -4.90953200 | -2.99024100 | 1.38750300  |
| H   | -0.22664300 | -5.31678100 | 3.67989900  |
| H   | -2.67502700 | -5.70386700 | 3.80220400  |
| H   | -5.00617500 | -5.15558500 | 1.71144600  |
| H   | -5.87034200 | -3.01458700 | 0.86516700  |
| H   | -4.89919900 | -2.11240700 | 2.04304400  |
| C   | -3.70611200 | -2.88970900 | 0.40718200  |

|   |             |             |             |
|---|-------------|-------------|-------------|
| C | -3.69030700 | -1.55872100 | -0.32170300 |
| C | -3.94400500 | -3.85112600 | -0.79239900 |
| C | -4.48327500 | -1.64195900 | -1.47249900 |
| C | -3.06747200 | -0.35890700 | -0.02104100 |
| C | -4.90204100 | -3.07419600 | -1.71520400 |
| H | -2.98873400 | -4.01521800 | -1.30305000 |
| H | -4.33247100 | -4.82316100 | -0.47518600 |
| C | -4.74758600 | -0.51233000 | -2.23256400 |
| C | -3.26564100 | 0.79134600  | -0.80133800 |
| H | -4.80453800 | -3.36059400 | -2.76635900 |
| C | -4.15562500 | 0.69825100  | -1.87508500 |
| H | -5.38451900 | -0.57053800 | -3.11032300 |
| H | -4.34567600 | 1.58731500  | -2.46801100 |
| H | -5.94939400 | -3.23701500 | -1.43202000 |
| H | -5.06711800 | -4.22715200 | 3.20847900  |
| C | -2.47907400 | 2.03594400  | -0.53677400 |
| C | -1.58313200 | 2.52699900  | -1.52332000 |
| C | -2.58241800 | 2.70111700  | 0.70164500  |
| C | -0.82076100 | 3.66002200  | -1.23602100 |
| C | -1.79737500 | 3.83449200  | 0.93166700  |
| C | -0.90906600 | 4.32927000  | -0.01477500 |
| H | -0.13716600 | 4.03642600  | -1.99374500 |
| H | -1.88171000 | 4.34733700  | 1.88739200  |
| C | -1.42209600 | 1.88918300  | -2.90152100 |
| H | -1.89212300 | 0.90257600  | -2.88309900 |
| C | -3.54899700 | 2.27332200  | 1.79583700  |
| H | -4.02779800 | 1.33890300  | 1.49418200  |
| C | -0.05868500 | 5.55183400  | 0.26830300  |
| H | -0.30933600 | 5.89614800  | 1.27958000  |
| C | 1.08518200  | -3.37504200 | 2.29164200  |
| C | 1.57868600  | -2.80843600 | 3.49200200  |
| C | 1.92556700  | -3.50557300 | 1.16987000  |
| C | 2.89443300  | -2.34601700 | 3.50623800  |
| C | 3.23735400  | -3.03711500 | 1.24676800  |
| C | 3.73437300  | -2.43794800 | 2.39841600  |
| H | 3.29157500  | -1.89156700 | 4.40814000  |
| H | 3.88634300  | -3.14659300 | 0.38000900  |
| C | 0.72375200  | -2.68303600 | 4.75631900  |
| H | 0.21359200  | -3.63845700 | 4.90914900  |
| C | 1.48851700  | -4.20747300 | -0.10818300 |
| H | 0.41628800  | -4.41214800 | -0.04835600 |
| C | 5.15332400  | -1.90605400 | 2.45230300  |
| H | 5.31079200  | -1.49394000 | 3.45730400  |
| C | -2.12615500 | 2.74915800  | -3.96183300 |

|   |             |             |             |
|---|-------------|-------------|-------------|
| H | -1.63836900 | 3.72747900  | -4.04039100 |
| H | -2.07815900 | 2.26695200  | -4.94365600 |
| H | -3.17665800 | 2.92703200  | -3.71558700 |
| C | 0.04157300  | 1.68106500  | -3.31472400 |
| H | 0.07629000  | 1.18204100  | -4.28830900 |
| H | 0.57717200  | 2.63015800  | -3.41793300 |
| H | 0.58615300  | 1.05165700  | -2.60607800 |
| C | 1.43459800  | 5.20611700  | 0.24290700  |
| H | 1.73863000  | 4.87067100  | -0.75492700 |
| H | 2.03766000  | 6.08326700  | 0.49860000  |
| H | 1.66694200  | 4.40696600  | 0.95255000  |
| C | -0.37151900 | 6.68934300  | -0.71033200 |
| H | -1.43329300 | 6.95083400  | -0.68606800 |
| H | 0.21145800  | 7.58201700  | -0.46185700 |
| H | -0.11901700 | 6.40058400  | -1.73662200 |
| C | -4.65915800 | 3.32017200  | 1.95979900  |
| H | -5.19882300 | 3.47413500  | 1.02021400  |
| H | -5.37674500 | 2.99842500  | 2.72169600  |
| H | -4.24584600 | 4.28499400  | 2.27363000  |
| C | -2.83030100 | 2.02309100  | 3.12748300  |
| H | -2.00365800 | 1.31747700  | 3.00744800  |
| H | -2.43096100 | 2.95519700  | 3.54243600  |
| H | -3.53348400 | 1.61355100  | 3.86019400  |
| C | -0.36114600 | -1.60291400 | 4.64128100  |
| H | 0.08994600  | -0.62670600 | 4.44781900  |
| H | -1.06001400 | -1.80326600 | 3.82488400  |
| H | -0.93073200 | -1.55619100 | 5.57642300  |
| C | 1.54584400  | -2.43264500 | 6.02430200  |
| H | 0.89428300  | -2.51203000 | 6.89979200  |
| H | 2.35889500  | -3.15668900 | 6.13637200  |
| H | 1.97779700  | -1.42617200 | 6.03100700  |
| C | 6.18107000  | -3.02190500 | 2.23339900  |
| H | 7.20059800  | -2.63243100 | 2.32334000  |
| H | 6.05143200  | -3.82627000 | 2.96330000  |
| H | 6.07593800  | -3.45590200 | 1.23290600  |
| C | 5.35683400  | -0.77307500 | 1.44006300  |
| H | 6.36649900  | -0.35681700 | 1.52206200  |
| H | 5.22715200  | -1.14166300 | 0.41645500  |
| H | 4.63295000  | 0.03078200  | 1.60072100  |
| C | 1.72664300  | -3.35055900 | -1.35604600 |
| H | 1.24100100  | -2.37574000 | -1.26304700 |
| H | 2.79602200  | -3.18867700 | -1.53012900 |
| H | 1.32369500  | -3.85480800 | -2.24088600 |
| C | 2.20277300  | -5.56031300 | -0.23172000 |



|   |            |             |             |
|---|------------|-------------|-------------|
| H | 3.28760000 | -5.42256000 | -0.30065300 |
| H | 1.99948100 | -6.19215200 | 0.63849500  |
| H | 1.87126100 | -6.09133500 | -1.13053200 |

**(R<sub>a</sub>,S)-Int1**

E = -4183.49104263 a.u.

0 1

|   |             |             |             |
|---|-------------|-------------|-------------|
| H | 0.53284800  | -1.12133700 | -0.93028700 |
| C | -0.52747000 | 1.87020700  | 1.84933900  |
| C | -1.30041000 | 1.69769200  | 0.74077200  |
| C | -2.54607900 | 2.38588400  | 0.49190100  |
| C | -0.88505600 | 0.61699600  | -0.18378900 |
| C | -3.32360600 | 2.04915300  | -0.56169000 |
| H | -2.91508500 | 3.10601000  | 1.21102500  |
| C | -1.75265000 | 0.32846800  | -1.31715300 |
| C | -2.90193100 | 1.01765100  | -1.49144600 |
| H | -1.44636200 | -0.45707100 | -2.00414300 |
| H | -3.53478100 | 0.78310300  | -2.34228600 |
| C | -0.66351200 | 2.89840400  | 2.87297300  |
| C | -0.35291800 | 2.57362800  | 4.21348900  |
| C | -0.99905800 | 4.22380600  | 2.57092000  |
| C | -0.38402500 | 3.55260300  | 5.20527500  |
| C | -1.04478500 | 5.20147700  | 3.55891500  |
| H | -1.18460600 | 4.48904000  | 1.53454000  |
| C | -0.73668400 | 4.85944600  | 4.87233600  |
| H | -0.16008900 | 3.30361800  | 6.23595700  |
| H | -1.30177300 | 6.22374700  | 3.30165600  |
| H | -0.76497300 | 5.61355100  | 5.65274900  |
| O | -0.07448400 | 1.26640000  | 4.45022100  |
| C | 0.33069600  | 0.89956400  | 5.75588600  |
| H | 0.56403600  | -0.16451900 | 5.71201100  |
| H | -0.47640000 | 1.06586500  | 6.47959400  |
| H | 1.22215000  | 1.45844900  | 6.06171500  |
| O | -4.50231100 | 2.71254700  | -0.73587900 |
| C | -5.54515000 | 2.02668400  | -1.40437500 |
| H | -5.40620600 | 2.04138000  | -2.49213500 |
| H | -6.46328300 | 2.56445600  | -1.16097600 |
| H | -5.62047400 | 0.98835700  | -1.05992400 |
| O | 0.18159800  | 0.00083100  | -0.00032100 |
| C | -4.73905800 | -0.48170900 | 1.44013200  |
| C | -3.40078800 | -0.56468600 | 1.89316800  |
| C | -2.53328000 | -1.48996400 | 1.28809200  |
| C | -3.01674000 | -2.31176600 | 0.27953100  |
| C | -4.35399200 | -2.21325100 | -0.14987500 |

|   |             |             |             |
|---|-------------|-------------|-------------|
| C | -5.23263600 | -1.29900500 | 0.41662600  |
| C | -4.49390200 | 0.99631500  | 3.12317100  |
| H | -1.49900700 | -1.57806900 | 1.61292100  |
| H | -2.34582000 | -3.03010000 | -0.18209500 |
| H | -4.70849400 | -2.87271500 | -0.93665500 |
| H | -6.26840900 | -1.23755100 | 0.09249900  |
| N | -5.38909700 | 0.47011300  | 2.19362800  |
| C | -6.80841200 | 0.72251400  | 2.10899600  |
| H | -7.35888500 | -0.22328400 | 2.14414900  |
| H | -7.06405800 | 1.24753000  | 1.18068200  |
| H | -7.10946700 | 1.34248100  | 2.95401900  |
| C | -4.89429600 | 2.01040100  | 4.12958700  |
| C | -5.36748700 | 3.21919100  | 3.76121500  |
| C | -5.51488000 | 3.65394700  | 2.32005900  |
| C | -5.75743800 | 4.31381400  | 4.73170900  |
| H | -5.18467100 | 2.87901700  | 1.62467900  |
| H | -5.61673300 | 4.01848400  | 5.77285700  |
| C | -4.68257500 | 1.62782000  | 5.59272100  |
| C | -3.31534600 | 2.11999800  | 6.09416100  |
| C | -4.83466100 | 0.12856800  | 5.88668400  |
| H | -5.45223800 | 2.13437200  | 6.18965700  |
| C | -3.12195700 | 1.82889800  | 7.58309100  |
| H | -2.53235800 | 1.60708100  | 5.51611100  |
| H | -3.20512400 | 3.19094800  | 5.88295200  |
| C | -4.66283700 | -0.15687700 | 7.38051100  |
| H | -4.07379400 | -0.42929100 | 5.32801600  |
| H | -5.81004700 | -0.22789300 | 5.53079500  |
| C | -3.30161100 | 0.33781700  | 7.87759800  |
| H | -2.13261800 | 2.17181100  | 7.91337800  |
| H | -3.85959200 | 2.40329600  | 8.16130800  |
| H | -4.76916100 | -1.23133400 | 7.57036500  |
| H | -5.45866200 | 0.34478400  | 7.94915000  |
| H | -3.18823200 | 0.14065000  | 8.94923700  |
| H | -2.51028100 | -0.22724400 | 7.36257500  |
| H | 0.27025600  | 1.14380100  | 1.99660400  |
| C | -3.27674700 | 0.38178300  | 2.96081400  |
| H | -2.37815300 | 0.59804700  | 3.52471400  |
| H | -6.58144600 | 3.84243700  | 2.11438300  |
| H | -6.82908400 | 4.53032700  | 4.60114800  |
| C | -4.74046500 | 4.95348500  | 2.04855200  |
| H | -4.87909900 | 5.24899200  | 1.00296800  |
| H | -3.66876200 | 4.76285500  | 2.19385300  |
| C | -4.97221000 | 5.60683100  | 4.45494200  |
| H | -5.29138600 | 6.38739000  | 5.15431500  |

|   |             |             |             |
|---|-------------|-------------|-------------|
| H | -3.90484700 | 5.41942100  | 4.63860300  |
| C | -5.15768800 | 6.06569400  | 3.00863800  |
| H | -4.57511600 | 6.97435100  | 2.81868600  |
| H | -6.21333200 | 6.32170000  | 2.84038900  |
| P | 0.84237600  | -3.31040400 | -1.17066600 |
| O | 0.79044000  | -1.82084700 | -1.63545900 |
| O | 1.40221300  | -4.10652300 | -2.45553600 |
| O | 2.10804700  | -3.29216800 | -0.15273200 |
| O | -0.36295200 | -3.97491800 | -0.65374500 |
| C | 4.84341500  | -3.31562600 | -3.43224700 |
| C | 3.76220300  | -3.89746700 | -2.76093100 |
| C | 2.47348700  | -3.58994400 | -3.16649300 |
| C | 2.22373000  | -2.77001200 | -4.27987600 |
| C | 3.33160500  | -2.30935900 | -4.99833700 |
| C | 4.63701000  | -2.55132000 | -4.57148600 |
| C | 6.13575300  | -3.62900700 | -2.71186600 |
| C | 5.63148600  | -4.15081100 | -1.35227400 |
| H | 3.15763600  | -1.69999900 | -5.88033500 |
| H | 5.47631900  | -2.12388300 | -5.11255400 |
| H | 6.71487800  | -4.39436100 | -3.24357800 |
| H | 6.33189000  | -4.82950200 | -0.85647200 |
| H | 5.43799000  | -3.30807300 | -0.67959600 |
| C | 4.27727100  | -4.83865400 | -1.68499300 |
| C | 3.50070600  | -5.21921000 | -0.43188400 |
| C | 4.55480800  | -6.25333400 | -2.27098400 |
| C | 3.89422500  | -6.49465500 | -0.00967200 |
| C | 2.54331200  | -4.53054400 | 0.30434200  |
| C | 4.79990100  | -7.13559700 | -1.03527900 |
| H | 3.65521900  | -6.59370000 | -2.79572500 |
| H | 5.38487800  | -6.25201400 | -2.98354100 |
| C | 3.42587300  | -7.02360600 | 1.18377800  |
| C | 2.00132100  | -5.06500500 | 1.48283200  |
| H | 4.55268300  | -8.18723800 | -1.20732400 |
| C | 2.50211100  | -6.29367600 | 1.92693800  |
| H | 3.75141100  | -8.00309000 | 1.52222700  |
| H | 2.11610900  | -6.69559700 | 2.85836200  |
| H | 5.85030100  | -7.09766600 | -0.71978200 |
| H | 6.77865700  | -2.74904400 | -2.61578000 |
| C | 0.87776500  | -4.41538100 | 2.22767900  |
| C | -0.37785000 | -5.05776200 | 2.27475500  |
| C | 1.06616300  | -3.19595000 | 2.90685200  |
| C | -1.39728400 | -4.49307300 | 3.04314700  |
| C | 0.00701500  | -2.66242000 | 3.64212700  |
| C | -1.22940500 | -3.29960000 | 3.73720900  |

|   |             |             |             |
|---|-------------|-------------|-------------|
| H | -2.35969600 | -4.99418600 | 3.07498800  |
| H | 0.13917500  | -1.70623500 | 4.14792900  |
| C | -0.68184500 | -6.34955400 | 1.52535000  |
| H | 0.12256400  | -6.52420900 | 0.80519100  |
| C | 2.40666900  | -2.47814000 | 2.92891200  |
| H | 3.06508900  | -2.95101200 | 2.19525800  |
| C | -2.32882400 | -2.68808600 | 4.58758500  |
| H | -2.28916400 | -1.60103500 | 4.42727800  |
| C | 0.82973100  | -2.32968100 | -4.59375200 |
| C | 0.50261100  | -0.95637100 | -4.53628000 |
| C | -0.18558000 | -3.27798600 | -4.84312200 |
| C | -0.83084100 | -0.57471900 | -4.69857800 |
| C | -1.50339000 | -2.84409900 | -4.98403800 |
| C | -1.85225100 | -1.49890500 | -4.89224900 |
| H | -1.08946500 | 0.48130900  | -4.64430800 |
| H | -2.28122200 | -3.58405900 | -5.16147400 |
| C | 1.52977900  | 0.14614200  | -4.30764000 |
| H | 2.46576500  | -0.31228500 | -3.98197700 |
| C | 0.09774000  | -4.76272000 | -5.02058400 |
| H | 1.14060300  | -4.95366600 | -4.75627100 |
| C | -3.29978200 | -1.05530400 | -4.97253000 |
| H | -3.31136100 | 0.03772600  | -4.85520900 |
| C | -0.74440700 | -7.53982900 | 2.49342400  |
| H | -0.94412900 | -8.46810700 | 1.94731700  |
| H | 0.18514400  | -7.66765900 | 3.05515800  |
| H | -1.55292200 | -7.39600100 | 3.21963000  |
| C | -1.98951700 | -6.27135400 | 0.72722500  |
| H | -2.10852900 | -7.18322300 | 0.13161500  |
| H | -2.86258900 | -6.19581000 | 1.38478600  |
| H | -1.97473200 | -5.41360500 | 0.05456800  |
| C | -2.05438500 | -2.95239000 | 6.07466500  |
| H | -2.83107300 | -2.49592800 | 6.70008000  |
| H | -2.04647300 | -4.03003700 | 6.27299200  |
| H | -1.08253400 | -2.54964300 | 6.38037100  |
| C | -3.73342900 | -3.16450000 | 4.21618700  |
| H | -3.92264400 | -3.05752800 | 3.14359800  |
| H | -3.87620200 | -4.21605900 | 4.49152300  |
| H | -4.48443600 | -2.57998000 | 4.75847400  |
| C | 3.06257100  | -2.63738300 | 4.30663100  |
| H | 2.44177700  | -2.17670200 | 5.08466500  |
| H | 3.18813600  | -3.69437800 | 4.56184100  |
| H | 4.04634100  | -2.15607500 | 4.32758900  |
| C | 2.28586900  | -1.00032500 | 2.54630600  |
| H | 1.80809200  | -0.88386700 | 1.56968300  |

|   |             |             |             |
|---|-------------|-------------|-------------|
| H | 1.69507200  | -0.43965500 | 3.28172600  |
| H | 3.27893500  | -0.53978700 | 2.50377900  |
| C | 1.12519300  | 1.13425300  | -3.20878300 |
| H | 0.20046000  | 1.66950500  | -3.45020200 |
| H | 0.99071100  | 0.62297900  | -2.25398700 |
| H | 1.91285400  | 1.88467300  | -3.08109200 |
| C | 1.79001200  | 0.90063400  | -5.61941800 |
| H | 2.57293000  | 1.65457800  | -5.48429600 |
| H | 2.09594200  | 0.22482600  | -6.42416700 |
| H | 0.87998700  | 1.41370000  | -5.95141100 |
| C | -4.12319100 | -1.66687500 | -3.83142100 |
| H | -4.19142700 | -2.75465000 | -3.94540900 |
| H | -3.66917700 | -1.47136100 | -2.85398900 |
| H | -5.14398700 | -1.26626800 | -3.82766700 |
| C | -3.92325700 | -1.38885700 | -6.33196800 |
| H | -4.95670300 | -1.03011800 | -6.38479300 |
| H | -3.35528100 | -0.93328000 | -7.14811900 |
| H | -3.93592600 | -2.47206100 | -6.49471500 |
| C | -0.78082900 | -5.63675300 | -4.11789000 |
| H | -0.45844600 | -6.68150400 | -4.18115800 |
| H | -0.72120400 | -5.31647000 | -3.07435800 |
| H | -1.83032200 | -5.60130300 | -4.43140500 |
| C | -0.07645500 | -5.15306400 | -6.49481100 |
| H | -1.10827500 | -4.98348000 | -6.82270700 |
| H | 0.58242800  | -4.56294100 | -7.13948800 |
| H | 0.15469700  | -6.21359300 | -6.64149200 |

**(R<sub>a</sub>,S)-TS1**

E = -4183.47111085 a.u.

0 1

|   |             |             |             |
|---|-------------|-------------|-------------|
| H | 0.03467500  | -0.90018600 | -0.51893100 |
| C | -1.34479300 | 1.53691600  | 1.91839100  |
| C | -1.83704200 | 1.53481300  | 0.58041600  |
| C | -2.93094900 | 2.30992800  | 0.13492600  |
| C | -1.30336100 | 0.52325000  | -0.27199800 |
| C | -3.53516100 | 2.04965600  | -1.07473600 |
| H | -3.35286500 | 3.07624700  | 0.77206800  |
| C | -1.93414800 | 0.26873000  | -1.50543100 |
| C | -3.02782600 | 1.01593700  | -1.89384200 |
| H | -1.54497700 | -0.52631300 | -2.13695500 |
| H | -3.49209900 | 0.78993000  | -2.84782800 |
| C | -1.13805100 | 2.68754700  | 2.78684100  |
| C | -0.55245900 | 2.48981400  | 4.06368700  |
| C | -1.32242900 | 4.00669700  | 2.34933000  |

|   |             |             |             |
|---|-------------|-------------|-------------|
| C | -0.25228600 | 3.57812200  | 4.88271800  |
| C | -1.01860600 | 5.09319800  | 3.15931400  |
| H | -1.65814500 | 4.17304200  | 1.33233900  |
| C | -0.49858800 | 4.87242900  | 4.43149900  |
| H | 0.17894100  | 3.42702700  | 5.86453500  |
| H | -1.16691300 | 6.10326900  | 2.79194600  |
| H | -0.25584500 | 5.71185000  | 5.07548800  |
| O | -0.31021000 | 1.20487600  | 4.41918900  |
| C | 0.39365900  | 0.96718000  | 5.62643100  |
| H | 0.52928200  | -0.11220100 | 5.68934800  |
| H | -0.18475700 | 1.31288400  | 6.49159800  |
| H | 1.37115100  | 1.46033300  | 5.60873800  |
| O | -4.63728500 | 2.80081900  | -1.38389900 |
| C | -5.30573000 | 2.49163000  | -2.58626100 |
| H | -4.66104600 | 2.65158100  | -3.45931000 |
| H | -6.15939500 | 3.16739400  | -2.64247100 |
| H | -5.66081000 | 1.45248600  | -2.59147800 |
| O | -0.22485000 | -0.11412000 | 0.12694800  |
| C | -4.39052400 | -0.48457700 | 1.35847900  |
| C | -3.13823200 | -0.75113600 | 1.93917200  |
| C | -2.35249800 | -1.77551900 | 1.39706600  |
| C | -2.84820600 | -2.50003900 | 0.31694700  |
| C | -4.10496200 | -2.21068900 | -0.23553200 |
| C | -4.89932000 | -1.18835500 | 0.26995800  |
| C | -4.14922100 | 0.99493800  | 3.04680500  |
| H | -1.36174100 | -1.99528800 | 1.78388200  |
| H | -2.22331800 | -3.27638400 | -0.11504200 |
| H | -4.45792300 | -2.79088300 | -1.08240700 |
| H | -5.86392400 | -0.94898500 | -0.16730800 |
| N | -4.98598100 | 0.56038400  | 2.06674800  |
| C | -6.38113900 | 0.90086000  | 1.86705300  |
| H | -6.95762400 | -0.02593000 | 1.80469000  |
| H | -6.51111100 | 1.46919300  | 0.94028800  |
| H | -6.73294200 | 1.49130700  | 2.71203800  |
| C | -4.55408600 | 1.97773600  | 4.08256700  |
| C | -5.03810300 | 3.20897200  | 3.79443200  |
| C | -5.33984900 | 3.73201500  | 2.40713900  |
| C | -5.37507500 | 4.23371900  | 4.85892900  |
| H | -5.05718000 | 3.02111400  | 1.63207400  |
| H | -5.11307600 | 3.89650300  | 5.86199500  |
| C | -4.43591600 | 1.49025000  | 5.53064200  |
| C | -3.09603000 | 1.86213300  | 6.18060000  |
| C | -4.71730500 | -0.01107600 | 5.69748900  |
| H | -5.22429900 | 1.99790700  | 6.09975700  |

|   |             |             |             |
|---|-------------|-------------|-------------|
| C | -3.05722100 | 1.45270600  | 7.65424300  |
| H | -2.29497100 | 1.34083200  | 5.64187500  |
| H | -2.90987100 | 2.93706800  | 6.06097400  |
| C | -4.67074700 | -0.41977500 | 7.17196500  |
| H | -3.97198200 | -0.59395800 | 5.14716800  |
| H | -5.69299300 | -0.25839700 | 5.25878100  |
| C | -3.32849600 | -0.04509300 | 7.80503800  |
| H | -2.08880900 | 1.71616000  | 8.09670500  |
| H | -3.81937900 | 2.01847500  | 8.20881000  |
| H | -4.84735400 | -1.49763700 | 7.26524300  |
| H | -5.48053500 | 0.08171500  | 7.72044700  |
| H | -3.30802900 | -0.33698800 | 8.86050100  |
| H | -2.52587900 | -0.60595400 | 7.30306500  |
| H | -0.68343800 | 0.70037100  | 2.13575200  |
| C | -2.94476800 | 0.24930600  | 2.96953400  |
| H | -2.23078900 | 0.19082700  | 3.78040400  |
| H | -6.43394800 | 3.84831600  | 2.33928900  |
| H | -6.46244400 | 4.40573400  | 4.84866700  |
| C | -4.70840400 | 5.10098900  | 2.11852900  |
| H | -5.03566600 | 5.44473700  | 1.13147300  |
| H | -3.62017100 | 4.98834800  | 2.07837300  |
| C | -4.67029400 | 5.57090600  | 4.57731300  |
| H | -4.92505300 | 6.28749700  | 5.36523500  |
| H | -3.58375300 | 5.41220500  | 4.61773500  |
| C | -5.05224400 | 6.11875500  | 3.20356700  |
| H | -4.53797500 | 7.06674300  | 3.01192000  |
| H | -6.13051400 | 6.33018700  | 3.18407000  |
| P | 0.66767700  | -3.32905700 | -1.08410100 |
| O | 0.40121200  | -1.88957500 | -1.46254100 |
| O | 1.33216700  | -4.09277100 | -2.37262800 |
| O | 1.96358300  | -3.23939400 | -0.06418300 |
| O | -0.37925900 | -4.23492100 | -0.55493800 |
| C | 4.73764000  | -3.13897600 | -3.31228000 |
| C | 3.67337300  | -3.76157200 | -2.65294700 |
| C | 2.36961000  | -3.50522800 | -3.05597300 |
| C | 2.10746400  | -2.67909200 | -4.16284800 |
| C | 3.20202100  | -2.17712000 | -4.87580400 |
| C | 4.51353700  | -2.37648300 | -4.44968900 |
| C | 6.03650200  | -3.41377100 | -2.58791000 |
| C | 5.54189600  | -3.96107500 | -1.23535800 |
| H | 3.00730500  | -1.56632900 | -5.75314300 |
| H | 5.34020100  | -1.91946600 | -4.98626300 |
| H | 6.64363900  | -4.15656300 | -3.12086900 |
| H | 6.26198900  | -4.61796900 | -0.73791500 |

|   |             |             |             |
|---|-------------|-------------|-------------|
| H | 5.31407400  | -3.12926900 | -0.55969100 |
| C | 4.21321000  | -4.69126100 | -1.58132400 |
| C | 3.44601800  | -5.10020100 | -0.33257400 |
| C | 4.54206900  | -6.09300500 | -2.16981500 |
| C | 3.89288100  | -6.35687500 | 0.09272300  |
| C | 2.45900200  | -4.44098700 | 0.39524200  |
| C | 4.81813600  | -6.96696100 | -0.93471100 |
| H | 3.65457300  | -6.46341600 | -2.69464300 |
| H | 5.37193900  | -6.06145000 | -2.88225800 |
| C | 3.45623500  | -6.89941700 | 1.29157900  |
| C | 1.96087400  | -4.99449100 | 1.58641900  |
| H | 4.60535800  | -8.02651200 | -1.10582100 |
| C | 2.51352900  | -6.19787800 | 2.03740700  |
| H | 3.82313000  | -7.86303800 | 1.63354300  |
| H | 2.15754900  | -6.60332600 | 2.97944500  |
| H | 5.86757900  | -6.89481800 | -0.62124800 |
| H | 6.65002300  | -2.51374800 | -2.48291000 |
| C | 0.84209300  | -4.38559100 | 2.37199900  |
| C | -0.37847800 | -5.08709100 | 2.49234200  |
| C | 1.01778400  | -3.17124900 | 3.06228300  |
| C | -1.36246800 | -4.59136200 | 3.34896400  |
| C | -0.00797800 | -2.70792600 | 3.89048500  |
| C | -1.19765400 | -3.40976500 | 4.06622100  |
| H | -2.29072500 | -5.14704000 | 3.44287800  |
| H | 0.12173500  | -1.76065600 | 4.41318600  |
| C | -0.67071500 | -6.38162200 | 1.74304000  |
| H | 0.10214400  | -6.51365800 | 0.98180200  |
| C | 2.30626100  | -2.36740800 | 2.98616500  |
| H | 2.97448800  | -2.85439300 | 2.27156100  |
| C | -2.24752100 | -2.90169400 | 5.03796700  |
| H | -2.17403100 | -1.80234500 | 5.04458500  |
| C | 0.71284300  | -2.26195300 | -4.49925700 |
| C | 0.37310600  | -0.89163400 | -4.45629900 |
| C | -0.27977900 | -3.21707500 | -4.80338700 |
| C | -0.94800000 | -0.51553100 | -4.71081200 |
| C | -1.58772400 | -2.78983200 | -5.03146900 |
| C | -1.94746300 | -1.44522200 | -4.97905500 |
| H | -1.21297500 | 0.54070000  | -4.67200300 |
| H | -2.34734200 | -3.53518000 | -5.26033600 |
| C | 1.37418500  | 0.21610100  | -4.14738500 |
| H | 2.31620300  | -0.24132600 | -3.84190100 |
| C | 0.02090100  | -4.70116200 | -4.95411300 |
| H | 1.05934800  | -4.87655500 | -4.66473800 |
| C | -3.38368600 | -1.01074200 | -5.20118700 |



|   |             |             |             |
|---|-------------|-------------|-------------|
| H | -3.41509500 | 0.08334400  | -5.09044800 |
| C | -0.64675400 | -7.58376200 | 2.69815300  |
| H | -0.83302300 | -8.51189000 | 2.14719400  |
| H | 0.31000900  | -7.68337600 | 3.21803700  |
| H | -1.42929800 | -7.48324300 | 3.45976300  |
| C | -2.01614300 | -6.33910700 | 1.00884900  |
| H | -2.14768600 | -7.26397900 | 0.43645000  |
| H | -2.85936000 | -6.26317000 | 1.70501900  |
| H | -2.03871000 | -5.49797400 | 0.31655500  |
| C | -1.93488100 | -3.39652300 | 6.45706100  |
| H | -2.67434800 | -3.02405400 | 7.17639000  |
| H | -1.95324600 | -4.49162400 | 6.48414700  |
| H | -0.94042900 | -3.07098900 | 6.77942800  |
| C | -3.67596800 | -3.28162400 | 4.64447000  |
| H | -3.90414500 | -2.97045900 | 3.61977400  |
| H | -3.82684100 | -4.36385100 | 4.71596700  |
| H | -4.39668200 | -2.81249000 | 5.32280300  |
| C | 3.01514500  | -2.35638500 | 4.34623200  |
| H | 2.40024800  | -1.85722000 | 5.10531000  |
| H | 3.21420100  | -3.37447000 | 4.69503700  |
| H | 3.96807900  | -1.82037100 | 4.28042700  |
| C | 2.05613600  | -0.94372200 | 2.48117600  |
| H | 1.58682600  | -0.95626600 | 1.49476200  |
| H | 1.40071500  | -0.38578000 | 3.16325400  |
| H | 3.00160100  | -0.39499700 | 2.40674500  |
| C | 0.93427400  | 1.10928800  | -2.98394400 |
| H | -0.00822600 | 1.62765100  | -3.19340300 |
| H | 0.81334700  | 0.51754100  | -2.07437600 |
| H | 1.69700000  | 1.87373700  | -2.79746700 |
| C | 1.63661800  | 1.06256500  | -5.40039300 |
| H | 2.39983700  | 1.82240000  | -5.20013700 |
| H | 1.97380900  | 0.44831300  | -6.24156500 |
| H | 0.72261900  | 1.57885800  | -5.71636000 |
| C | -4.31984700 | -1.62602900 | -4.15292600 |
| H | -4.35192800 | -2.71598700 | -4.25973000 |
| H | -3.98094300 | -1.40670800 | -3.13465800 |
| H | -5.34213500 | -1.24791500 | -4.27321900 |
| C | -3.86286700 | -1.34880600 | -6.61736300 |
| H | -4.88748900 | -0.99632800 | -6.77854400 |
| H | -3.21479500 | -0.89116200 | -7.37015000 |
| H | -3.85075900 | -2.43222700 | -6.77835400 |
| C | -0.86664100 | -5.56555700 | -4.05123000 |
| H | -0.55784700 | -6.61444400 | -4.11823900 |
| H | -0.79689600 | -5.25046000 | -3.00671400 |

|   |             |             |             |
|---|-------------|-------------|-------------|
| H | -1.91643100 | -5.51418200 | -4.36348200 |
| C | -0.12106100 | -5.11963100 | -6.42400400 |
| H | -1.14939800 | -4.97579500 | -6.77490200 |
| H | 0.53906900  | -4.52961300 | -7.06769800 |
| H | 0.13141600  | -6.17836200 | -6.54739800 |

**(R<sub>a</sub>,S)-Int2**

E = -4183.49613519 a.u.

0 1

|   |             |             |             |
|---|-------------|-------------|-------------|
| H | 0.08065200  | -0.70728900 | -0.45231700 |
| C | -1.73918300 | 1.22391200  | 2.17506400  |
| C | -2.10713100 | 1.35128800  | 0.71644800  |
| C | -3.24552000 | 2.02642300  | 0.29558800  |
| C | -1.36900200 | 0.59765700  | -0.21496800 |
| C | -3.68904900 | 1.96331200  | -1.02314800 |
| H | -3.80964000 | 2.62275400  | 1.00084000  |
| C | -1.83889500 | 0.49573900  | -1.52739800 |
| C | -2.98087600 | 1.18147600  | -1.93604900 |
| H | -1.30336100 | -0.14128400 | -2.22643100 |
| H | -3.30217700 | 1.08596100  | -2.96758800 |
| C | -1.29684400 | 2.47515800  | 2.90548500  |
| C | -0.48528700 | 2.32747800  | 4.04825100  |
| C | -1.57017900 | 3.76655300  | 2.46653500  |
| C | 0.00039200  | 3.43794400  | 4.73571900  |
| C | -1.10224400 | 4.88815900  | 3.15330000  |
| H | -2.12029100 | 3.89702000  | 1.54159000  |
| C | -0.32085600 | 4.71920100  | 4.28789100  |
| H | 0.62770300  | 3.31872800  | 5.61082500  |
| H | -1.32795900 | 5.88285300  | 2.78233600  |
| H | 0.06185600  | 5.58087500  | 4.82560200  |
| O | -0.24741600 | 1.03958300  | 4.43915700  |
| C | 0.55656300  | 0.83717500  | 5.58390600  |
| H | 0.60376000  | -0.24119500 | 5.73752100  |
| H | 0.10845600  | 1.31090400  | 6.46715100  |
| H | 1.56829300  | 1.22781400  | 5.42891400  |
| O | -4.82968100 | 2.67209500  | -1.30802400 |
| C | -5.29114100 | 2.60465600  | -2.63716300 |
| H | -4.54750900 | 3.00165800  | -3.33955500 |
| H | -6.19295000 | 3.21638400  | -2.68215500 |
| H | -5.53412200 | 1.57355000  | -2.92595500 |
| O | -0.26126000 | -0.02075400 | 0.21583400  |
| C | -4.50933200 | -0.94184100 | 1.93007900  |
| C | -3.13841800 | -0.87558300 | 2.14980300  |
| C | -2.31435100 | -1.82482800 | 1.56281900  |

|   |             |             |            |
|---|-------------|-------------|------------|
| C | -2.90735400 | -2.83120700 | 0.79645600 |
| C | -4.29309600 | -2.89008400 | 0.62312400 |
| C | -5.13361600 | -1.93073600 | 1.18685900 |
| C | -4.22746100 | 0.94814400  | 3.15657100 |
| H | -1.23379000 | -1.78730700 | 1.65807700 |
| H | -2.24947400 | -3.54428600 | 0.30904200 |
| H | -4.72072400 | -3.68426600 | 0.01998000 |
| H | -6.20700100 | -1.95215700 | 1.03005300 |
| N | -5.11362400 | 0.16643700  | 2.58821200 |
| C | -6.56365500 | 0.28488500  | 2.65258300 |
| H | -6.96788400 | -0.68008000 | 2.96552500 |
| H | -6.94525100 | 0.53816700  | 1.66020100 |
| H | -6.83114600 | 1.06055000  | 3.36736300 |
| C | -4.61115900 | 2.03520800  | 4.08517400 |
| C | -5.25976700 | 3.14920600  | 3.68258600 |
| C | -5.79315700 | 3.40316400  | 2.29031000 |
| C | -5.53789100 | 4.31101300  | 4.61112400 |
| H | -5.60861000 | 2.57342200  | 1.60530700 |
| H | -5.11596500 | 4.15676800  | 5.60523900 |
| C | -4.33641300 | 1.71510800  | 5.56026400 |
| C | -2.95746900 | 2.14871100  | 6.06686700 |
| C | -4.59126800 | 0.23232200  | 5.89434500 |
| H | -5.08699000 | 2.27615200  | 6.13047600 |
| C | -2.82670700 | 1.90604400  | 7.57164600 |
| H | -2.19205800 | 1.55444300  | 5.55720600 |
| H | -2.77182100 | 3.19777800  | 5.80596500 |
| C | -4.42993400 | -0.02975900 | 7.39417000 |
| H | -3.88243600 | -0.41013900 | 5.35405600 |
| H | -5.59726200 | -0.06118000 | 5.56471800 |
| C | -3.05745800 | 0.42792900  | 7.89352100 |
| H | -1.83702100 | 2.22653800  | 7.91652200 |
| H | -3.56282200 | 2.51820500  | 8.11172400 |
| H | -4.57742900 | -1.09615900 | 7.59903300 |
| H | -5.21302300 | 0.51107400  | 7.94335900 |
| H | -2.96578100 | 0.24583900  | 8.96925000 |
| H | -2.27767200 | -0.17149900 | 7.39980600 |
| H | -0.88344100 | 0.54172400  | 2.21056100 |
| C | -2.83908900 | 0.37867600  | 2.92865900 |
| H | -2.41357200 | 0.16812300  | 3.91981700 |
| H | -6.88764500 | 3.48936000  | 2.38745100 |
| H | -6.62648100 | 4.42062200  | 4.72691400 |
| C | -5.27071800 | 4.71877700  | 1.69162900 |
| H | -5.72109300 | 4.86919400  | 0.70603900 |
| H | -4.18837500 | 4.64055200  | 1.53681000 |

|   |             |             |             |
|---|-------------|-------------|-------------|
| C | -4.97237500 | 5.61340200  | 4.01602500  |
| H | -5.18446600 | 6.44188200  | 4.69948800  |
| H | -3.88059800 | 5.51799700  | 3.94547200  |
| C | -5.55180100 | 5.89119800  | 2.62944900  |
| H | -5.12876000 | 6.81371800  | 2.21891500  |
| H | -6.63670800 | 6.04597500  | 2.71201400  |
| P | 0.74282600  | -3.20512700 | -1.06878600 |
| O | 0.65072800  | -1.74141900 | -1.40569500 |
| O | 1.32665500  | -4.01770100 | -2.37380300 |
| O | 2.04553800  | -3.30333100 | -0.05126000 |
| O | -0.39642500 | -4.00604700 | -0.55202700 |
| C | 4.78631700  | -3.26849200 | -3.31065000 |
| C | 3.68612100  | -3.84546100 | -2.66865300 |
| C | 2.39913900  | -3.48954800 | -3.05182100 |
| C | 2.18939600  | -2.61374400 | -4.13093600 |
| C | 3.31173100  | -2.15457900 | -4.82920900 |
| C | 4.60897000  | -2.44926300 | -4.41598000 |
| C | 6.06762900  | -3.65190600 | -2.60474600 |
| C | 5.54388700  | -4.21682100 | -1.27077900 |
| H | 3.15322000  | -1.50367900 | -5.68441000 |
| H | 5.46167400  | -2.02382400 | -4.93762100 |
| H | 6.62502300  | -4.41130800 | -3.16798900 |
| H | 6.22261500  | -4.93585400 | -0.80165000 |
| H | 5.37054700  | -3.39796600 | -0.56385800 |
| C | 4.17063200  | -4.84754600 | -1.63687500 |
| C | 3.38366000  | -5.25300300 | -0.40088700 |
| C | 4.40782200  | -6.24427100 | -2.27902100 |
| C | 3.74936900  | -6.54992700 | -0.02435900 |
| C | 2.44540000  | -4.55376300 | 0.35434600  |
| C | 4.62973000  | -7.18020800 | -1.07873300 |
| H | 3.49736500  | -6.53699600 | -2.81360200 |
| H | 5.23659200  | -6.23925900 | -2.99344000 |
| C | 3.28349700  | -7.10596400 | 1.15781600  |
| C | 1.91826800  | -5.11738800 | 1.52872900  |
| H | 4.34801000  | -8.21671900 | -1.28783600 |
| C | 2.39137500  | -6.37143600 | 1.93236300  |
| H | 3.58781000  | -8.10307000 | 1.46326200  |
| H | 2.00380200  | -6.79130200 | 2.85633300  |
| H | 5.68249200  | -7.18841400 | -0.76825000 |
| H | 6.73718500  | -2.79688900 | -2.46986900 |
| C | 0.83776300  | -4.46966100 | 2.33373400  |
| C | -0.39783000 | -5.13734600 | 2.48967400  |
| C | 1.05346200  | -3.24429200 | 2.99586100  |
| C | -1.35853600 | -4.59933500 | 3.34926400  |

|   |             |             |             |
|---|-------------|-------------|-------------|
| C | 0.04901600  | -2.73674300 | 3.82223400  |
| C | -1.15479100 | -3.40435300 | 4.03137400  |
| H | -2.30150900 | -5.12753600 | 3.46442400  |
| H | 0.20304900  | -1.77342500 | 4.30791700  |
| C | -0.74190600 | -6.44108100 | 1.77661300  |
| H | 0.07122900  | -6.68329300 | 1.08939100  |
| C | 2.35405500  | -2.46330000 | 2.88806500  |
| H | 3.02504600  | -2.99958200 | 2.21314500  |
| C | -2.18123200 | -2.81788600 | 4.98423300  |
| H | -2.13903800 | -1.72420900 | 4.85798400  |
| C | 0.82449600  | -2.11310100 | -4.47528600 |
| C | 0.55724900  | -0.72726100 | -4.40878900 |
| C | -0.20378900 | -3.00453500 | -4.84494700 |
| C | -0.72557700 | -0.27216500 | -4.72398400 |
| C | -1.47181600 | -2.49931300 | -5.13247400 |
| C | -1.75791100 | -1.13805400 | -5.07220700 |
| H | -0.93406600 | 0.79622100  | -4.67284800 |
| H | -2.25815400 | -3.19637900 | -5.41681500 |
| C | 1.60334000  | 0.31270700  | -4.02130900 |
| H | 2.49848000  | -0.20881100 | -3.67859100 |
| C | 0.01376000  | -4.50302900 | -4.99695700 |
| H | 1.03390200  | -4.74027800 | -4.68779600 |
| C | -3.14819300 | -0.61795100 | -5.38457600 |
| H | -3.14088900 | 0.46652700  | -5.20195300 |
| C | -0.88249500 | -7.58920700 | 2.78603300  |
| H | -1.05706000 | -8.53679100 | 2.26552900  |
| H | 0.01160700  | -7.69932900 | 3.40754100  |
| H | -1.73165700 | -7.41556700 | 3.45744800  |
| C | -2.01256300 | -6.32513000 | 0.92522000  |
| H | -2.26290000 | -7.30456200 | 0.50204100  |
| H | -2.87250200 | -5.99053700 | 1.51840400  |
| H | -1.84330000 | -5.62492200 | 0.10562800  |
| C | -1.79856600 | -3.12099900 | 6.43920400  |
| H | -2.51667500 | -2.67265500 | 7.13720500  |
| H | -1.78802600 | -4.20335300 | 6.60743200  |
| H | -0.80019500 | -2.73742700 | 6.67317300  |
| C | -3.61271900 | -3.27895100 | 4.70539400  |
| H | -3.87772000 | -3.16053500 | 3.64926100  |
| H | -3.73770500 | -4.33518600 | 4.96835700  |
| H | -4.32466500 | -2.70937400 | 5.31487700  |
| C | 3.04927300  | -2.37772800 | 4.25295500  |
| H | 2.44051200  | -1.81602600 | 4.97187100  |
| H | 3.22625300  | -3.37371900 | 4.67084800  |
| H | 4.01276400  | -1.86530200 | 4.16004300  |

|   |             |             |             |
|---|-------------|-------------|-------------|
| C | 2.12174500  | -1.06883000 | 2.29813200  |
| H | 1.68080800  | -1.13464100 | 1.30101400  |
| H | 1.45032300  | -0.47253500 | 2.93039300  |
| H | 3.07141800  | -0.52826600 | 2.21731500  |
| C | 1.15956400  | 1.21370200  | -2.86426000 |
| H | 0.25456000  | 1.78263500  | -3.10588300 |
| H | 0.97247400  | 0.62403200  | -1.96485500 |
| H | 1.95199400  | 1.93672300  | -2.64010400 |
| C | 1.97823400  | 1.16845100  | -5.23967400 |
| H | 2.77921000  | 1.87116900  | -4.98557300 |
| H | 2.31224700  | 0.55536400  | -6.08280900 |
| H | 1.11500300  | 1.75214800  | -5.58036500 |
| C | -4.20577400 | -1.25048600 | -4.47168000 |
| H | -4.29002400 | -2.32516100 | -4.66603400 |
| H | -3.94815300 | -1.12496200 | -3.41517200 |
| H | -5.19042500 | -0.80259500 | -4.65133600 |
| C | -3.50644500 | -0.83930900 | -6.85879500 |
| H | -4.49714100 | -0.43097900 | -7.08732200 |
| H | -2.77347000 | -0.36316100 | -7.51631900 |
| H | -3.52041800 | -1.90965600 | -7.09209500 |
| C | -0.94066700 | -5.31011100 | -4.10896300 |
| H | -0.70142000 | -6.37725100 | -4.17469100 |
| H | -0.86193900 | -5.00061900 | -3.06339800 |
| H | -1.98042000 | -5.18612800 | -4.43446800 |
| C | -0.12468800 | -4.91539600 | -6.46862800 |
| H | -1.13619800 | -4.71557100 | -6.84027200 |
| H | 0.57975500  | -4.36471900 | -7.10004300 |
| H | 0.07042300  | -5.98689200 | -6.58637100 |

**(S<sub>a</sub>,R)-Int1**

E = -4183.49323565 a.u.

0 1

|   |            |             |            |
|---|------------|-------------|------------|
| P | 2.28755000 | 0.10546200  | 4.67137400 |
| O | 2.77559900 | 1.55459000  | 4.99331400 |
| O | 3.47805100 | -0.67666100 | 3.90870200 |
| O | 2.36470200 | -0.51628200 | 6.16297700 |
| O | 1.02121200 | -0.06714900 | 3.94124000 |
| H | 2.28699900 | 2.28212600  | 4.46042900 |
| C | 6.59959700 | -0.81558700 | 5.82420000 |
| C | 5.32818100 | -1.15477800 | 5.34902200 |
| C | 4.78098600 | -0.42043500 | 4.30934200 |
| C | 5.50158400 | 0.59092900  | 3.65464600 |
| C | 6.81573000 | 0.81512000  | 4.07784900 |
| C | 7.35984500 | 0.14563800  | 5.17392700 |

|   |             |             |            |
|---|-------------|-------------|------------|
| C | 6.91381200  | -1.60046000 | 7.07867200 |
| C | 5.53243300  | -2.16690300 | 7.46482900 |
| H | 7.40246800  | 1.57068800  | 3.56430100 |
| H | 8.35871900  | 0.39218700  | 5.52233700 |
| H | 7.63334200  | -2.40432400 | 6.87898000 |
| H | 5.58636600  | -3.09124400 | 8.04783700 |
| H | 4.97695700  | -1.42533500 | 8.04918900 |
| C | 4.81022100  | -2.36738900 | 6.10353200 |
| C | 3.33455100  | -2.70205600 | 6.25864400 |
| C | 5.31623400  | -3.68548400 | 5.44685100 |
| C | 3.17238900  | -4.08773100 | 6.36443400 |
| C | 2.20952900  | -1.88779300 | 6.29767100 |
| C | 4.48728800  | -4.79119000 | 6.12224500 |
| H | 5.08283000  | -3.65167900 | 4.37680800 |
| H | 6.39691300  | -3.81545600 | 5.55578700 |
| C | 1.92307100  | -4.64020600 | 6.60886600 |
| C | 0.92335900  | -2.41927300 | 6.46655200 |
| H | 4.37378600  | -5.68126600 | 5.49660500 |
| C | 0.81537900  | -3.79945700 | 6.67235500 |
| H | 1.80278400  | -5.71450700 | 6.71466800 |
| H | -0.17398200 | -4.21655000 | 6.83480300 |
| H | 4.94649500  | -5.11413900 | 7.06522400 |
| H | 7.34583200  | -0.97035200 | 7.86171300 |
| C | -0.31480500 | -1.58880300 | 6.34158900 |
| C | -1.21340100 | -1.85967800 | 5.28483100 |
| C | -0.61064000 | -0.56985900 | 7.26623500 |
| C | -2.41426600 | -1.15190700 | 5.21916000 |
| C | -1.82409200 | 0.11435300  | 7.15196300 |
| C | -2.75282700 | -0.17647500 | 6.15441400 |
| H | -3.10971000 | -1.38278400 | 4.41564300 |
| H | -2.06885100 | 0.88348600  | 7.88427000 |
| C | -0.94424800 | -2.90466700 | 4.20766100 |
| H | 0.07777900  | -3.27219800 | 4.32855000 |
| C | 0.30969600  | -0.21592600 | 8.42502700 |
| H | 1.19999200  | -0.84761800 | 8.36669300 |
| C | -4.11856900 | 0.49019500  | 6.16790100 |
| H | -4.01050900 | 1.45661200  | 6.68106900 |
| C | 4.84749800  | 1.42932500  | 2.60161200 |
| C | 4.72521100  | 2.82965700  | 2.78169800 |
| C | 4.30689200  | 0.82842600  | 1.44599800 |
| C | 4.06511900  | 3.57662700  | 1.80625300 |
| C | 3.65369100  | 1.62488400  | 0.50251300 |
| C | 3.51559600  | 2.99886900  | 0.66250600 |
| H | 3.96293800  | 4.65322300  | 1.94131700 |

|   |             |             |             |
|---|-------------|-------------|-------------|
| H | 3.24263900  | 1.14695900  | -0.38230800 |
| C | 5.33339400  | 3.57504500  | 3.96610300  |
| H | 5.64520800  | 2.84247600  | 4.71392700  |
| C | 4.44764800  | -0.65412000 | 1.12980500  |
| H | 4.90786800  | -1.15542400 | 1.98406500  |
| C | 2.86040600  | 3.87746500  | -0.38905900 |
| H | 2.32539500  | 4.67773700  | 0.14508800  |
| C | 0.56194300  | 5.83049600  | 2.96703200  |
| C | -0.26978600 | 4.89741500  | 3.49621100  |
| C | -1.71464500 | 5.02107200  | 3.55382800  |
| C | 0.37547000  | 3.66995200  | 4.03574600  |
| C | -2.43536700 | 4.08731400  | 4.21731700  |
| H | -2.17793600 | 5.82026300  | 2.98349700  |
| C | -0.45023700 | 2.79435000  | 4.85829000  |
| C | -1.77683800 | 3.01094000  | 4.93698400  |
| H | 0.00365700  | 1.92520700  | 5.32420100  |
| H | -2.41013300 | 2.33713200  | 5.50404100  |
| C | 0.22106600  | 7.21517500  | 2.64572100  |
| C | 0.82593300  | 7.84831900  | 1.53887200  |
| C | -0.56632700 | 7.98873000  | 3.50711500  |
| C | 0.60952500  | 9.20396800  | 1.29408300  |
| C | -0.76415700 | 9.34788600  | 3.28257300  |
| H | -0.99066100 | 7.51125000  | 4.38521100  |
| C | -0.18338600 | 9.94655900  | 2.16985200  |
| H | 1.06210600  | 9.68898400  | 0.43697800  |
| H | -1.36515700 | 9.93230300  | 3.97107400  |
| H | -0.33556100 | 11.00411400 | 1.97587500  |
| O | 1.61545200  | 7.05908200  | 0.76636900  |
| C | 2.50034800  | 7.70155000  | -0.13328200 |
| H | 3.13496000  | 6.91578600  | -0.54153900 |
| H | 1.95733700  | 8.18742000  | -0.95092600 |
| H | 3.11439900  | 8.44255300  | 0.39126400  |
| O | -3.78596100 | 4.01261700  | 4.28207500  |
| C | -4.49990800 | 4.83583300  | 3.38646000  |
| H | -4.17556100 | 4.64016800  | 2.35574700  |
| H | -5.55244700 | 4.57822900  | 3.50522000  |
| H | -4.35479600 | 5.89941700  | 3.61666700  |
| O | 1.57592800  | 3.44353300  | 3.81539000  |
| C | -2.64926200 | 3.16607700  | 0.47371800  |
| C | -1.27135500 | 3.39616400  | 0.69229300  |
| C | -0.53409700 | 2.45790000  | 1.43329700  |
| C | -1.18519400 | 1.35391300  | 1.96059800  |
| C | -2.56402400 | 1.16213000  | 1.75216400  |
| C | -3.31626200 | 2.05679900  | 1.00295300  |



|   |             |             |             |
|---|-------------|-------------|-------------|
| C | -2.11033400 | 5.11253500  | -0.52465700 |
| H | 0.53239400  | 2.59663000  | 1.59933400  |
| H | -0.62821200 | 0.65093500  | 2.57178800  |
| H | -3.04711000 | 0.29097800  | 2.18519700  |
| H | -4.37881000 | 1.90030800  | 0.83776200  |
| N | -3.14066400 | 4.20830800  | -0.28462500 |
| C | -4.49094300 | 4.26097200  | -0.79280700 |
| H | -4.72876000 | 3.33564000  | -1.32744300 |
| H | -5.21512900 | 4.39163000  | 0.02131400  |
| H | -4.57968200 | 5.10452900  | -1.47813700 |
| C | -2.30536900 | 6.34340600  | -1.33138800 |
| C | -3.13225300 | 7.31887000  | -0.90634400 |
| C | -3.87420500 | 7.24986200  | 0.40861700  |
| C | -3.30275900 | 8.66541600  | -1.57211600 |
| H | -3.76129400 | 6.27117300  | 0.87974500  |
| H | -2.79460600 | 8.72715900  | -2.53612600 |
| C | -1.47564400 | 6.44303700  | -2.60307800 |
| C | -0.06778100 | 6.99647400  | -2.32157800 |
| C | -1.37743200 | 5.11624200  | -3.37077200 |
| H | -1.96879900 | 7.15368100  | -3.27844900 |
| C | 0.72900900  | 7.17490200  | -3.61611800 |
| H | 0.46611100  | 6.30126900  | -1.65700100 |
| H | -0.15845000 | 7.94759800  | -1.77810700 |
| C | -0.59114600 | 5.29706000  | -4.67194300 |
| H | -0.88091500 | 4.36783600  | -2.74028700 |
| H | -2.38465800 | 4.73459500  | -3.58099300 |
| C | 0.80561200  | 5.86348600  | -4.40226800 |
| H | 1.73850700  | 7.54398700  | -3.39529900 |
| H | 0.24139900  | 7.93981200  | -4.23694400 |
| H | -0.51572800 | 4.34140200  | -5.20171600 |
| H | -1.13583200 | 5.98491300  | -5.33426200 |
| H | 1.34345800  | 6.01675200  | -5.34429100 |
| H | 1.38407200  | 5.13055500  | -3.82291400 |
| H | 1.60039000  | 5.53470000  | 2.82370600  |
| C | -0.95983700 | 4.64463800  | 0.06415400  |
| H | -0.00636000 | 5.15683000  | 0.08419000  |
| C | -1.90210600 | -4.09533200 | 4.35238400  |
| H | -1.67467300 | -4.86317800 | 3.60539600  |
| H | -1.84098100 | -4.55292700 | 5.34454800  |
| H | -2.93946000 | -3.77592900 | 4.19998000  |
| C | -1.03915000 | -2.32084700 | 2.79351900  |
| H | -0.80361800 | -3.09639100 | 2.05634900  |
| H | -2.04876200 | -1.95624300 | 2.57209200  |
| H | -0.33303000 | -1.49772900 | 2.67354400  |

|   |             |             |             |
|---|-------------|-------------|-------------|
| C | -5.09301300 | -0.36104200 | 6.99496300  |
| H | -6.07488500 | 0.12020800  | 7.05837200  |
| H | -5.22178600 | -1.34376800 | 6.52779000  |
| H | -4.71539300 | -0.51837400 | 8.00962900  |
| C | -4.69562400 | 0.75994300  | 4.77646400  |
| H | -4.00303700 | 1.32537800  | 4.14602000  |
| H | -4.93994300 | -0.17722800 | 4.26324500  |
| H | -5.62193700 | 1.33733400  | 4.86249100  |
| C | -0.36907100 | -0.50685000 | 9.76987000  |
| H | -1.25297600 | 0.12435700  | 9.91269000  |
| H | -0.68869000 | -1.55172100 | 9.83033000  |
| H | 0.32060500  | -0.30823600 | 10.59698500 |
| C | 0.77126500  | 1.24393800  | 8.34856700  |
| H | 1.32327700  | 1.43306600  | 7.42349500  |
| H | -0.08171400 | 1.93117300  | 8.39158600  |
| H | 1.43120500  | 1.47850400  | 9.19070100  |
| C | 4.36522700  | 4.53154900  | 4.67077100  |
| H | 3.96386300  | 5.28870600  | 3.98862500  |
| H | 3.52526900  | 3.99509300  | 5.11288300  |
| H | 4.89566500  | 5.05788600  | 5.47194700  |
| C | 6.57417700  | 4.35266600  | 3.50030700  |
| H | 7.08096000  | 4.82063200  | 4.35112800  |
| H | 7.29080000  | 3.70831800  | 2.98168000  |
| H | 6.28454000  | 5.14597600  | 2.80120500  |
| C | 1.85697400  | 3.14183300  | -1.27842700 |
| H | 2.36767000  | 2.45118100  | -1.95939600 |
| H | 1.12645400  | 2.57389500  | -0.69571300 |
| H | 1.30591200  | 3.86202400  | -1.89294700 |
| C | 3.94493900  | 4.52406700  | -1.26459400 |
| H | 3.49799500  | 5.18011100  | -2.02278900 |
| H | 4.65233800  | 5.10732600  | -0.66526900 |
| H | 4.51518200  | 3.74717700  | -1.78593800 |
| C | 3.08802200  | -1.31622500 | 0.87387300  |
| H | 3.21120200  | -2.39973800 | 0.77063400  |
| H | 2.39293600  | -1.12021200 | 1.69448100  |
| H | 2.63665700  | -0.94775900 | -0.05404800 |
| C | 5.38661900  | -0.85355600 | -0.06784900 |
| H | 4.97946100  | -0.38034200 | -0.96824300 |
| H | 6.37119700  | -0.41652400 | 0.12626800  |
| H | 5.51736900  | -1.92046300 | -0.27845800 |
| H | -4.94836000 | 7.41522900  | 0.23362100  |
| H | -4.37278200 | 8.84021900  | -1.75816800 |
| C | -3.33158000 | 8.33731100  | 1.34526000  |
| H | -3.83598600 | 8.29508100  | 2.31890000  |

|   |             |             |             |
|---|-------------|-------------|-------------|
| H | -2.27073100 | 8.12261100  | 1.51751900  |
| C | -2.78318700 | 9.77742100  | -0.64106400 |
| H | -2.93197800 | 10.75528200 | -1.11241900 |
| H | -1.70222500 | 9.64094200  | -0.50025700 |
| C | -3.46847500 | 9.72664600  | 0.72492100  |
| H | -3.03835900 | 10.48238600 | 1.39244600  |
| H | -4.53377100 | 9.97109300  | 0.60724300  |

**(S<sub>a</sub>,R)-TS1**

E = -4183.47039278 a.u.

0 1

|   |             |             |            |
|---|-------------|-------------|------------|
| P | 2.09043600  | -0.01196100 | 4.41603100 |
| O | 2.30453300  | 1.47184000  | 4.59966400 |
| O | 3.44616400  | -0.69867200 | 3.79016900 |
| O | 2.15639800  | -0.57098100 | 5.95959300 |
| O | 0.94843900  | -0.56654400 | 3.65073100 |
| H | 1.73646100  | 2.46437700  | 3.71020700 |
| C | 6.37654000  | -0.66425800 | 5.98346700 |
| C | 5.17383900  | -1.06546000 | 5.39384800 |
| C | 4.65851800  | -0.33766700 | 4.32743300 |
| C | 5.36001100  | 0.75459000  | 3.79113300 |
| C | 6.61403100  | 1.05510400  | 4.33520500 |
| C | 7.12000300  | 0.37347900  | 5.43939300 |
| C | 6.64753600  | -1.47561700 | 7.23009500 |
| C | 5.27398700  | -2.11732500 | 7.49958900 |
| H | 7.17683300  | 1.87903800  | 3.90577700 |
| H | 8.06805300  | 0.66936900  | 5.87960300 |
| H | 7.41603100  | -2.23867100 | 7.05171100 |
| H | 5.32912600  | -3.05153900 | 8.06678300 |
| H | 4.64087100  | -1.41666500 | 8.05498700 |
| C | 4.66003700  | -2.31851400 | 6.08476400 |
| C | 3.19297700  | -2.70926300 | 6.15693600 |
| C | 5.25174600  | -3.61020900 | 5.45170800 |
| C | 3.08113500  | -4.09801700 | 6.27437000 |
| C | 2.04299900  | -1.92899000 | 6.14072900 |
| C | 4.43044400  | -4.75178800 | 6.07940100 |
| H | 5.07455100  | -3.57820700 | 4.37099400 |
| H | 6.32948100  | -3.70072200 | 5.61873800 |
| C | 1.84663700  | -4.69163400 | 6.49708900 |
| C | 0.77386700  | -2.50753000 | 6.30137500 |
| H | 4.37382800  | -5.63677600 | 5.43840200 |
| C | 0.71042600  | -3.88645800 | 6.53129500 |
| H | 1.75990200  | -5.76797300 | 6.61595800 |
| H | -0.26518600 | -4.33601500 | 6.69058800 |

|   |             |             |             |
|---|-------------|-------------|-------------|
| H | 4.86171300  | -5.07358200 | 7.03602000  |
| H | 6.99740600  | -0.85498200 | 8.06060000  |
| C | -0.48497500 | -1.71361400 | 6.14989900  |
| C | -1.39014800 | -2.05051000 | 5.11567600  |
| C | -0.79021900 | -0.64949500 | 7.01855800  |
| C | -2.59393000 | -1.35529200 | 5.01447200  |
| C | -2.00668900 | 0.02515400  | 6.86580600  |
| C | -2.92860400 | -0.31641200 | 5.88164600  |
| H | -3.29438900 | -1.63910400 | 4.23103200  |
| H | -2.25086700 | 0.83382700  | 7.55407900  |
| C | -1.11279200 | -3.14032100 | 4.08701400  |
| H | -0.07362500 | -3.45841300 | 4.19604600  |
| C | 0.12452200  | -0.21526700 | 8.15406900  |
| H | 1.02518800  | -0.83307600 | 8.13029600  |
| C | -4.27583900 | 0.37827500  | 5.79825800  |
| H | -4.22570600 | 1.27619900  | 6.43029800  |
| C | 4.77822700  | 1.62834100  | 2.72454100  |
| C | 4.57656000  | 3.00572700  | 2.98935800  |
| C | 4.44879800  | 1.11211500  | 1.45643800  |
| C | 4.10703300  | 3.82480600  | 1.96488400  |
| C | 3.97602300  | 1.97893500  | 0.46388100  |
| C | 3.81371900  | 3.34087700  | 0.69070800  |
| H | 3.95929200  | 4.88623200  | 2.16532200  |
| H | 3.74563800  | 1.56584800  | -0.51529600 |
| C | 4.87771200  | 3.65687500  | 4.33595600  |
| H | 5.13490300  | 2.87157000  | 5.04946500  |
| C | 4.62877800  | -0.35124700 | 1.07938100  |
| H | 5.00641100  | -0.89208900 | 1.94937600  |
| C | 3.43091400  | 4.32217700  | -0.40445900 |
| H | 2.78514000  | 5.08582200  | 0.05407800  |
| C | 0.19721200  | 5.48202900  | 2.14662700  |
| C | -0.52575700 | 4.71857800  | 3.11907800  |
| C | -1.83645300 | 5.05363400  | 3.55953200  |
| C | 0.09845400  | 3.53268700  | 3.59945800  |
| C | -2.50764700 | 4.22775200  | 4.43079600  |
| H | -2.28890800 | 5.96808600  | 3.19713600  |
| C | -0.61984400 | 2.69172600  | 4.48394800  |
| C | -1.88463700 | 3.04236800  | 4.88551600  |
| H | -0.17078000 | 1.76435700  | 4.82528600  |
| H | -2.43158700 | 2.40467800  | 5.57275300  |
| C | 0.21648700  | 6.96256900  | 2.16102200  |
| C | 0.85465500  | 7.70565900  | 1.14039700  |
| C | -0.13757800 | 7.64976900  | 3.33319500  |
| C | 1.07878500  | 9.07565400  | 1.28720100  |

|   |             |             |             |
|---|-------------|-------------|-------------|
| C | 0.10661400  | 9.00988800  | 3.49365600  |
| H | -0.54871200 | 7.08427200  | 4.16080100  |
| C | 0.70833200  | 9.72238700  | 2.46469400  |
| H | 1.56904700  | 9.63772300  | 0.50200700  |
| H | -0.15698800 | 9.49937600  | 4.42468400  |
| H | 0.90932800  | 10.78343600 | 2.57315800  |
| O | 1.26367600  | 7.00912100  | 0.05110900  |
| C | 2.17084100  | 7.63748200  | -0.83577000 |
| H | 2.44590600  | 6.88002000  | -1.57072500 |
| H | 1.70480100  | 8.48493600  | -1.35051300 |
| H | 3.06608200  | 7.97339000  | -0.30030500 |
| O | -3.76539300 | 4.45217800  | 4.91571100  |
| C | -4.34040300 | 5.70021800  | 4.62471100  |
| H | -4.52016800 | 5.82715800  | 3.54699400  |
| H | -5.29402500 | 5.73323000  | 5.15163200  |
| H | -3.70033100 | 6.52405100  | 4.96845200  |
| O | 1.32866200  | 3.28191500  | 3.21120600  |
| C | -2.06977500 | 3.15722400  | 0.89598700  |
| C | -0.69338300 | 3.23940500  | 0.63569900  |
| C | 0.11430900  | 2.13368900  | 0.90977100  |
| C | -0.47744400 | 0.99898100  | 1.45284400  |
| C | -1.84978900 | 0.96208900  | 1.74447100  |
| C | -2.67880300 | 2.04188700  | 1.46222900  |
| C | -1.71135000 | 5.20249700  | 0.01206100  |
| H | 1.19048900  | 2.17355500  | 0.76372200  |
| H | 0.14456800  | 0.15456800  | 1.72564200  |
| H | -2.26221900 | 0.07906500  | 2.22412500  |
| H | -3.73953200 | 2.01875000  | 1.69191500  |
| N | -2.65640500 | 4.36499800  | 0.49446400  |
| C | -4.08908800 | 4.56673000  | 0.51581100  |
| H | -4.57858200 | 3.67504000  | 0.11570800  |
| H | -4.42916800 | 4.72814200  | 1.54491200  |
| H | -4.34181700 | 5.42977300  | -0.09913800 |
| C | -2.04478200 | 6.34523300  | -0.87817700 |
| C | -2.68486700 | 7.45651000  | -0.46716500 |
| C | -3.15939700 | 7.66114000  | 0.95165000  |
| C | -3.03642100 | 8.61102200  | -1.38073900 |
| H | -2.80060800 | 6.84979000  | 1.59000200  |
| H | -2.60678300 | 8.49220300  | -2.37650100 |
| C | -1.71273800 | 6.06110300  | -2.34663200 |
| C | -0.28530200 | 6.46647300  | -2.73807400 |
| C | -1.98604600 | 4.59832200  | -2.74354900 |
| H | -2.39756700 | 6.66459600  | -2.95467600 |
| C | -0.01923700 | 6.22803000  | -4.22650700 |

|   |             |             |             |
|---|-------------|-------------|-------------|
| H | 0.42624100  | 5.87763800  | -2.14590000 |
| H | -0.12492500 | 7.51946800  | -2.47412800 |
| C | -1.73730200 | 4.38416200  | -4.23807600 |
| H | -1.33038100 | 3.92425100  | -2.17569700 |
| H | -3.01868600 | 4.33069900  | -2.48469800 |
| C | -0.30661700 | 4.77540100  | -4.61317000 |
| H | 1.01741800  | 6.49104200  | -4.46729000 |
| H | -0.66114300 | 6.89365000  | -4.82064100 |
| H | -1.92872700 | 3.33869900  | -4.50073900 |
| H | -2.44401700 | 4.99355300  | -4.81877900 |
| H | -0.13734500 | 4.62690800  | -5.68481100 |
| H | 0.39497600  | 4.11520700  | -4.08419100 |
| H | 1.15592500  | 5.04266700  | 1.87291000  |
| C | -0.43849500 | 4.60395400  | 0.21257300  |
| H | 0.44491500  | 4.94619500  | -0.30365700 |
| C | -2.02529000 | -4.35407700 | 4.30927600  |
| H | -1.79559400 | -5.14477300 | 3.58681100  |
| H | -1.92109200 | -4.76955400 | 5.31595100  |
| H | -3.07677400 | -4.07313100 | 4.17646200  |
| C | -1.26540900 | -2.62656500 | 2.65113400  |
| H | -0.96435800 | -3.40615000 | 1.94268000  |
| H | -2.30549200 | -2.36381900 | 2.42239600  |
| H | -0.62703800 | -1.75340800 | 2.50686600  |
| C | -5.37765500 | -0.52831600 | 6.36181600  |
| H | -6.34936700 | -0.02271100 | 6.34368400  |
| H | -5.45761100 | -1.44328300 | 5.76411700  |
| H | -5.15557000 | -0.82008200 | 7.39235600  |
| C | -4.62474400 | 0.82888100  | 4.37631000  |
| H | -3.82822400 | 1.44918300  | 3.95482400  |
| H | -4.77009700 | -0.03311900 | 3.71451200  |
| H | -5.55366000 | 1.40940000  | 4.37661100  |
| C | -0.54928800 | -0.44116700 | 9.51392000  |
| H | -1.44716800 | 0.17778700  | 9.62019800  |
| H | -0.84570900 | -1.48753500 | 9.63712200  |
| H | 0.13541800  | -0.17836400 | 10.32738600 |
| C | 0.55880600  | 1.24647800  | 7.99120400  |
| H | 1.07838900  | 1.39816300  | 7.04082800  |
| H | -0.30528200 | 1.92098600  | 8.02951900  |
| H | 1.23789600  | 1.53165100  | 8.80226500  |
| C | 3.67799500  | 4.40722000  | 4.92774000  |
| H | 3.28605800  | 5.16580300  | 4.24045500  |
| H | 2.87380300  | 3.71170900  | 5.16855000  |
| H | 3.98680800  | 4.91645900  | 5.84780500  |
| C | 6.07774100  | 4.60703000  | 4.20792600  |

|   |             |             |             |
|---|-------------|-------------|-------------|
| H | 6.35321600  | 5.01256200  | 5.18730400  |
| H | 6.95387100  | 4.10633800  | 3.78410200  |
| H | 5.83323100  | 5.45147400  | 3.55255700  |
| C | 2.67252400  | 3.70206000  | -1.57962700 |
| H | 3.31218000  | 3.01517000  | -2.14437000 |
| H | 1.78438200  | 3.14739900  | -1.25727000 |
| H | 2.35123600  | 4.48636800  | -2.27771100 |
| C | 4.70060800  | 5.02161800  | -0.91537400 |
| H | 4.47312500  | 5.74395300  | -1.70853600 |
| H | 5.21588700  | 5.54520300  | -0.10447600 |
| H | 5.39273900  | 4.27805600  | -1.32534400 |
| C | 3.29261800  | -0.98903700 | 0.67906100  |
| H | 3.43332800  | -2.05183700 | 0.45381300  |
| H | 2.56130400  | -0.90414400 | 1.48788600  |
| H | 2.88201000  | -0.51204900 | -0.21931500 |
| C | 5.66940400  | -0.50447600 | -0.03786300 |
| H | 5.33919000  | -0.01467700 | -0.96081200 |
| H | 6.62754500  | -0.06264600 | 0.25332700  |
| H | 5.83249400  | -1.56373300 | -0.26335500 |
| H | -4.26100500 | 7.60967000  | 0.94980600  |
| H | -4.13037300 | 8.63855300  | -1.50123400 |
| C | -2.73749300 | 9.01947600  | 1.52146700  |
| H | -3.14545200 | 9.14006000  | 2.53151200  |
| H | -1.64860000 | 9.03464900  | 1.60923600  |
| C | -2.58386800 | 9.95430100  | -0.78692700 |
| H | -2.87511900 | 10.76609600 | -1.46141400 |
| H | -1.48692700 | 9.96146900  | -0.72110800 |
| C | -3.16776300 | 10.16456700 | 0.60852100  |
| H | -2.83449100 | 11.12251400 | 1.02154700  |
| H | -4.26424200 | 10.20559600 | 0.54440400  |

**(S<sub>a</sub>,R)-Int2**

E = -4183.48644319 a.u.

0 1

|   |            |             |            |
|---|------------|-------------|------------|
| P | 2.06083400 | -0.00518800 | 4.46751600 |
| O | 2.27939600 | 1.46834600  | 4.68688900 |
| O | 3.41821500 | -0.68843800 | 3.82908100 |
| O | 2.12612600 | -0.60411500 | 5.99859600 |
| O | 0.92908000 | -0.55692100 | 3.68179700 |
| H | 1.71075900 | 2.53885100  | 3.76720300 |
| C | 6.34734400 | -0.69214900 | 6.02211600 |
| C | 5.14503300 | -1.08410300 | 5.42565900 |
| C | 4.62982500 | -0.33913500 | 4.37049200 |
| C | 5.33443600 | 0.75890500  | 3.84950400 |

|   |             |             |            |
|---|-------------|-------------|------------|
| C | 6.58752200  | 1.05153100  | 4.39980300 |
| C | 7.09137600  | 0.35402200  | 5.49506700 |
| C | 6.61768000  | -1.52254500 | 7.25633400 |
| C | 5.24415700  | -2.16870800 | 7.51487000 |
| H | 7.15179900  | 1.88082400  | 3.98278100 |
| H | 8.03861400  | 0.64347300  | 5.94131800 |
| H | 7.38654300  | -2.28264900 | 7.06689400 |
| H | 5.29916900  | -3.11136400 | 8.06804200 |
| H | 4.61024700  | -1.47668300 | 8.08008000 |
| C | 4.63117200  | -2.34856000 | 6.09669600 |
| C | 3.16465100  | -2.74230300 | 6.16285400 |
| C | 5.22370400  | -3.63067600 | 5.44501700 |
| C | 3.05329200  | -4.13250000 | 6.26130800 |
| C | 2.01450900  | -1.96248700 | 6.15745800 |
| C | 4.40327300  | -4.78218000 | 6.05616200 |
| H | 5.04623800  | -3.58301900 | 4.36490000 |
| H | 6.30156800  | -3.72309200 | 5.61047900 |
| C | 1.81901300  | -4.72955400 | 6.47717000 |
| C | 0.74557000  | -2.54381000 | 6.31215400 |
| H | 4.34734800  | -5.65775800 | 5.40218800 |
| C | 0.68193100  | -3.92545200 | 6.52335500 |
| H | 1.73289900  | -5.80751000 | 6.58131600 |
| H | -0.29357300 | -4.37826700 | 6.67541600 |
| H | 4.83539500  | -5.11771800 | 7.00769200 |
| H | 6.96672400  | -0.91462900 | 8.09657400 |
| C | -0.50487300 | -1.73712000 | 6.16236900 |
| C | -1.40352100 | -2.04864800 | 5.11483700 |
| C | -0.79587600 | -0.66887200 | 7.03078400 |
| C | -2.58309100 | -1.31678100 | 4.99365700 |
| C | -1.98687900 | 0.04455900  | 6.85636200 |
| C | -2.89793800 | -0.26472700 | 5.85275600 |
| H | -3.27998400 | -1.57865500 | 4.19875000 |
| H | -2.21934100 | 0.85830000  | 7.54241800 |
| C | -1.14252000 | -3.15004700 | 4.09424600 |
| H | -0.11524700 | -3.49828500 | 4.22000600 |
| C | 0.10471500  | -0.27419300 | 8.19203100 |
| H | 0.99276000  | -0.91045000 | 8.17448200 |
| C | -4.21182900 | 0.48403100  | 5.72836700 |
| H | -4.16994500 | 1.34238400  | 6.41283000 |
| C | 4.75878600  | 1.64317900  | 2.78750900 |
| C | 4.55787400  | 3.01852900  | 3.06102800 |
| C | 4.44014100  | 1.13821400  | 1.51139600 |
| C | 4.09976100  | 3.84784100  | 2.03869200 |
| C | 3.97951800  | 2.01427500  | 0.52156300 |



|   |             |             |             |
|---|-------------|-------------|-------------|
| C | 3.81720000  | 3.37539500  | 0.75818900  |
| H | 3.94949300  | 4.90694100  | 2.24791000  |
| H | 3.75909700  | 1.60993900  | -0.46393600 |
| C | 4.85026100  | 3.65744300  | 4.41526900  |
| H | 5.09938100  | 2.86473900  | 5.12346200  |
| C | 4.62026300  | -0.32282800 | 1.12470300  |
| H | 4.99633500  | -0.86938700 | 1.99183500  |
| C | 3.44425900  | 4.36420400  | -0.33419400 |
| H | 2.83526500  | 5.15317800  | 0.12998300  |
| C | 0.15029700  | 5.36227100  | 1.84940700  |
| C | -0.54565000 | 4.71642600  | 3.03373100  |
| C | -1.83451500 | 5.08465300  | 3.45179600  |
| C | 0.09951400  | 3.64023900  | 3.66055100  |
| C | -2.48767700 | 4.38122700  | 4.45531600  |
| H | -2.29545900 | 5.95903100  | 3.00985900  |
| C | -0.57749100 | 2.91775800  | 4.66260200  |
| C | -1.84813300 | 3.28963100  | 5.05477200  |
| H | -0.08908100 | 2.06103400  | 5.11694700  |
| H | -2.36708500 | 2.74027100  | 5.83446400  |
| C | 0.29042500  | 6.88156300  | 1.95063000  |
| C | 0.88668300  | 7.64908700  | 0.92822200  |
| C | 0.04102000  | 7.53646700  | 3.16081200  |
| C | 1.14002800  | 9.01144100  | 1.09553500  |
| C | 0.31763700  | 8.89074300  | 3.35026100  |
| H | -0.34630300 | 6.96157000  | 3.99262900  |
| C | 0.85364500  | 9.63304000  | 2.30991000  |
| H | 1.59092700  | 9.58617600  | 0.29554900  |
| H | 0.11726400  | 9.34990400  | 4.31229500  |
| H | 1.07144100  | 10.68903100 | 2.43421300  |
| O | 1.24415500  | 6.98137500  | -0.20724000 |
| C | 2.14439200  | 7.61829500  | -1.09083400 |
| H | 2.41422100  | 6.87199500  | -1.83982300 |
| H | 1.67950600  | 8.47630400  | -1.59125000 |
| H | 3.04574000  | 7.94444800  | -0.55948900 |
| O | -3.74388200 | 4.68025100  | 4.91999900  |
| C | -4.32119500 | 5.87340100  | 4.46405500  |
| H | -4.52893800 | 5.84409800  | 3.38287300  |
| H | -5.26316800 | 5.98930700  | 5.00114600  |
| H | -3.67510300 | 6.73922500  | 4.66571600  |
| O | 1.32719500  | 3.32078700  | 3.24169900  |
| C | -2.02589300 | 3.09666300  | 0.90883100  |
| C | -0.65567900 | 3.26651500  | 0.72220300  |
| C | 0.19802600  | 2.20613500  | 0.97954500  |
| C | -0.35919800 | 1.01918500  | 1.46581400  |

|   |             |             |             |
|---|-------------|-------------|-------------|
| C | -1.72938400 | 0.90484100  | 1.71102800  |
| C | -2.60734700 | 1.94766500  | 1.41190300  |
| C | -1.80722000 | 5.21184600  | 0.13316300  |
| H | 1.27499200  | 2.30537600  | 0.88553500  |
| H | 0.29445400  | 0.19897600  | 1.74070300  |
| H | -2.11149100 | -0.00684100 | 2.15897500  |
| H | -3.67383800 | 1.86280800  | 1.59371000  |
| N | -2.67205300 | 4.30423400  | 0.51100300  |
| C | -4.12125100 | 4.39932000  | 0.46249400  |
| H | -4.51185100 | 3.54793100  | -0.09961100 |
| H | -4.49674800 | 4.35953900  | 1.48952600  |
| H | -4.40537800 | 5.33678100  | -0.01323000 |
| C | -2.15277400 | 6.32152700  | -0.78873900 |
| C | -2.76975300 | 7.45996700  | -0.43011500 |
| C | -3.23820400 | 7.75386600  | 0.97123700  |
| C | -3.04447300 | 8.59465700  | -1.38910800 |
| H | -2.99128000 | 6.92779800  | 1.64179800  |
| H | -2.67088800 | 8.38891900  | -2.39385700 |
| C | -1.82512000 | 5.95926700  | -2.24816900 |
| C | -0.46001100 | 6.46947200  | -2.72869400 |
| C | -1.96027500 | 4.45499000  | -2.55204200 |
| H | -2.59264300 | 6.45572100  | -2.85624700 |
| C | -0.26416000 | 6.20207500  | -4.22266200 |
| H | 0.32825200  | 5.95589900  | -2.16667100 |
| H | -0.36461400 | 7.53807800  | -2.49879100 |
| C | -1.76688400 | 4.18641500  | -4.04667500 |
| H | -1.20867400 | 3.88070200  | -1.98947300 |
| H | -2.94475800 | 4.09026700  | -2.23116700 |
| C | -0.41482700 | 4.71137100  | -4.53312900 |
| H | 0.72174200  | 6.56139600  | -4.53839400 |
| H | -1.00867900 | 6.77150300  | -4.79676000 |
| H | -1.85457600 | 3.11330400  | -4.24359400 |
| H | -2.57146900 | 4.68104700  | -4.60844500 |
| H | -0.30130900 | 4.53095400  | -5.60694000 |
| H | 0.38806400  | 4.15545300  | -4.02919400 |
| H | 1.17152900  | 4.95935800  | 1.84130200  |
| C | -0.42170800 | 4.73436000  | 0.46720500  |
| H | 0.28683300  | 4.98648100  | -0.32093100 |
| C | -2.09230000 | -4.33564700 | 4.31123300  |
| H | -1.87552600 | -5.13893300 | 3.59858100  |
| H | -2.01356300 | -4.74459900 | 5.32304000  |
| H | -3.13352000 | -4.02578700 | 4.16227700  |
| C | -1.25568000 | -2.64180000 | 2.65303900  |
| H | -0.96804700 | -3.43504600 | 1.95408300  |

|   |             |             |             |
|---|-------------|-------------|-------------|
| H | -2.28413300 | -2.34986900 | 2.40625600  |
| H | -0.58724100 | -1.78950200 | 2.51562200  |
| C | -5.38434300 | -0.40471400 | 6.16116100  |
| H | -6.33162400 | 0.14335300  | 6.10948500  |
| H | -5.46121500 | -1.27976100 | 5.50592000  |
| H | -5.24596600 | -0.76490400 | 7.18465200  |
| C | -4.43816000 | 1.02887800  | 4.31458300  |
| H | -3.58868800 | 1.63989400  | 3.99633700  |
| H | -4.56032700 | 0.20875100  | 3.59567900  |
| H | -5.34444900 | 1.64425900  | 4.28024300  |
| C | -0.60447700 | -0.51506700 | 9.53143600  |
| H | -1.49271400 | 0.11913900  | 9.62901400  |
| H | -0.92380400 | -1.55774200 | 9.62592300  |
| H | 0.06571700  | -0.28223500 | 10.36592600 |
| C | 0.57335600  | 1.18098800  | 8.07268400  |
| H | 1.12120700  | 1.34134700  | 7.13980600  |
| H | -0.27608800 | 1.87418400  | 8.10511800  |
| H | 1.23690900  | 1.43307800  | 8.90735200  |
| C | 3.64988000  | 4.40824400  | 5.00540000  |
| H | 3.26232600  | 5.17135000  | 4.32104600  |
| H | 2.84226000  | 3.71436700  | 5.23903200  |
| H | 3.95747400  | 4.91069600  | 5.92967200  |
| C | 6.05494400  | 4.60396700  | 4.30302300  |
| H | 6.32596200  | 4.99900300  | 5.28791600  |
| H | 6.93195600  | 4.10431700  | 3.87956200  |
| H | 5.81712000  | 5.45574900  | 3.65471800  |
| C | 2.63497600  | 3.76387600  | -1.48641100 |
| H | 3.23686600  | 3.06017800  | -2.07173200 |
| H | 1.74426700  | 3.23015000  | -1.13650400 |
| H | 2.31147500  | 4.55646300  | -2.17427400 |
| C | 4.72419600  | 5.01560400  | -0.88079800 |
| H | 4.50091300  | 5.74727300  | -1.66656400 |
| H | 5.27849700  | 5.51958100  | -0.08355600 |
| H | 5.37814300  | 4.24782500  | -1.30874600 |
| C | 3.28426300  | -0.95791200 | 0.71993300  |
| H | 3.42665800  | -2.01601100 | 0.47411500  |
| H | 2.55965400  | -0.89081800 | 1.53639800  |
| H | 2.86690800  | -0.46514800 | -0.16703500 |
| C | 5.66173700  | -0.47034000 | 0.00751700  |
| H | 5.33168000  | 0.02199500  | -0.91419900 |
| H | 6.61882700  | -0.02782500 | 0.30098100  |
| H | 5.82693900  | -1.52854000 | -0.22155200 |
| H | -4.33715000 | 7.83388700  | 0.94748300  |
| H | -4.13266200 | 8.73603900  | -1.46586000 |

|   |             |             |             |
|---|-------------|-------------|-------------|
| C | -2.65527700 | 9.07134900  | 1.49811600  |
| H | -3.05080700 | 9.27737700  | 2.49858000  |
| H | -1.57336400 | 8.95419500  | 1.59497600  |
| C | -2.42013800 | 9.89656900  | -0.85650700 |
| H | -2.62853700 | 10.71257400 | -1.55587800 |
| H | -1.32923600 | 9.77187200  | -0.81095600 |
| C | -2.94416200 | 10.22614700 | 0.54093300  |
| H | -2.47793500 | 11.14440800 | 0.91287600  |
| H | -4.02613500 | 10.41240700 | 0.48977900  |

**(R<sub>a</sub>,R)-Int1**

E = -4183.49112746 a.u.

0 1

|   |             |             |             |
|---|-------------|-------------|-------------|
| P | -0.14360400 | -0.94344000 | 0.64545700  |
| O | 0.57958900  | -0.29668400 | 1.74941500  |
| O | -0.37916600 | -2.53875700 | 0.76594500  |
| O | -1.65098700 | -0.34320900 | 0.54847600  |
| O | 0.45766300  | -0.88217100 | -0.80685100 |
| H | 0.78099400  | 0.05877700  | -0.96926000 |
| C | -2.73549300 | -3.15119600 | 3.51405400  |
| C | -2.24272600 | -2.91221200 | 2.22768600  |
| C | -0.87516700 | -2.94071200 | 2.00574200  |
| C | 0.01857500  | -3.34072300 | 3.00620100  |
| C | -0.51853200 | -3.67619100 | 4.25394800  |
| C | -1.87838000 | -3.54642100 | 4.53071900  |
| C | -4.22659000 | -2.89713800 | 3.55642000  |
| C | -4.47668500 | -2.16651100 | 2.22111800  |
| H | 0.16145000  | -4.01320500 | 5.02957300  |
| H | -2.25547100 | -3.75214800 | 5.52838700  |
| H | -4.78940800 | -3.83754000 | 3.60844400  |
| H | -5.49170100 | -2.29802700 | 1.83384300  |
| H | -4.29302400 | -1.09326900 | 2.34354300  |
| C | -3.39913100 | -2.74591600 | 1.26441100  |
| C | -3.29382600 | -1.98454800 | -0.04342400 |
| C | -3.86357300 | -4.13630500 | 0.73904300  |
| C | -4.15764000 | -2.54715800 | -0.98907000 |
| C | -2.52792600 | -0.87749000 | -0.38814000 |
| C | -4.78411900 | -3.81031600 | -0.44754400 |
| H | -2.98293300 | -4.68244500 | 0.38236800  |
| H | -4.34227900 | -4.73548000 | 1.51910900  |
| C | -4.32427900 | -1.96139200 | -2.23466000 |
| C | -2.65051200 | -0.28092600 | -1.65114500 |
| H | -4.82128800 | -4.61113600 | -1.19180400 |
| C | -3.58437900 | -0.82444100 | -2.54202100 |

|   |             |             |             |
|---|-------------|-------------|-------------|
| H | -5.00923800 | -2.38609000 | -2.96277600 |
| H | -3.70689000 | -0.34190200 | -3.50669900 |
| H | -5.81419400 | -3.62836600 | -0.11518200 |
| H | -4.51936300 | -2.30033000 | 4.42536900  |
| C | -1.85533700 | 0.90397800  | -2.09706700 |
| C | -0.99107300 | 0.79093600  | -3.20813200 |
| C | -2.06510600 | 2.16233400  | -1.49871300 |
| C | -0.40642100 | 1.94709500  | -3.73187400 |
| C | -1.45996900 | 3.28588400  | -2.06174800 |
| C | -0.64789800 | 3.20658500  | -3.18997100 |
| H | 0.23935300  | 1.85773500  | -4.60237700 |
| H | -1.64204400 | 4.26608200  | -1.62011100 |
| C | -0.69107400 | -0.53754400 | -3.89474600 |
| H | -1.12039400 | -1.34232100 | -3.29145700 |
| C | -2.96424800 | 2.36143500  | -0.28876700 |
| H | -3.32230100 | 1.38668000  | 0.04814100  |
| C | -0.12895600 | 4.48077200  | -3.82614400 |
| H | -0.04658200 | 5.22382800  | -3.02246600 |
| C | 1.48931300  | -3.41306300 | 2.76217700  |
| C | 2.36809000  | -2.61856500 | 3.52581900  |
| C | 2.00459300  | -4.30466300 | 1.79638400  |
| C | 3.74381900  | -2.76477400 | 3.33105700  |
| C | 3.38514700  | -4.39261300 | 1.62563000  |
| C | 4.27412800  | -3.63388500 | 2.38387800  |
| H | 4.42916300  | -2.16637700 | 3.92840100  |
| H | 3.77707300  | -5.08195000 | 0.87994200  |
| C | 1.89121000  | -1.58988300 | 4.54226800  |
| H | 0.81643500  | -1.44064200 | 4.40568200  |
| C | 1.12613900  | -5.21146400 | 0.94570400  |
| H | 0.07810900  | -5.01241700 | 1.18292500  |
| C | 5.77188700  | -3.74733400 | 2.18013600  |
| H | 6.24623600  | -2.99899800 | 2.82923300  |
| C | 0.17062600  | 8.44848400  | 0.27010000  |
| C | 0.77617100  | 8.04608500  | -0.91779700 |
| C | 1.10572100  | 6.70807700  | -1.09105100 |
| C | 0.83202300  | 5.75460100  | -0.09801600 |
| C | 0.18903800  | 6.17940000  | 1.09094200  |
| C | -0.12439800 | 7.52855600  | 1.27351600  |
| H | -0.08543200 | 9.49263600  | 0.42173300  |
| H | 0.98250000  | 8.76528200  | -1.70241800 |
| H | 1.55573300  | 6.37545400  | -2.02183100 |
| H | -0.59628500 | 7.86250800  | 2.18948700  |
| C | 1.09085100  | 4.33726800  | -0.28796200 |
| H | 0.36855300  | 3.64912700  | 0.14583100  |

|   |             |            |             |
|---|-------------|------------|-------------|
| C | 2.11813700  | 3.77417300 | -0.98990100 |
| C | 2.01384200  | 2.32158600 | -1.27194200 |
| C | 3.30295800  | 4.48685200 | -1.41539300 |
| C | 3.01920200  | 1.75428700 | -2.16716400 |
| C | 4.25791300  | 3.86457600 | -2.14156900 |
| C | 4.08141600  | 2.49164400 | -2.56703800 |
| H | 2.89595300  | 0.71699100 | -2.46102900 |
| H | 4.84311600  | 2.06169700 | -3.21298800 |
| O | 5.41716100  | 4.51406600 | -2.47907300 |
| C | 6.53992500  | 4.03018000 | -1.75603400 |
| H | 6.72788600  | 2.96958000 | -1.96765100 |
| H | 7.39890300  | 4.62213000 | -2.07444200 |
| H | 6.38180000  | 4.15184500 | -0.67601000 |
| O | -0.05784800 | 5.21611900 | 1.99618900  |
| C | -0.83515900 | 5.53976300 | 3.13675900  |
| H | -1.03483200 | 4.59492700 | 3.64180200  |
| H | -0.27751700 | 6.20376600 | 3.80790000  |
| H | -1.77750800 | 6.01488000 | 2.83914700  |
| O | 1.10336000  | 1.63396500 | -0.78862000 |
| C | 2.89330500  | 3.62040100 | 2.98354900  |
| C | 1.89344400  | 2.78565000 | 2.54113300  |
| N | 2.56910100  | 4.06155300 | 4.27085000  |
| H | 1.83611100  | 2.28324800 | 1.58544700  |
| C | 3.40321600  | 4.79260700 | 5.19607500  |
| H | 4.39044000  | 4.93507900 | 4.75686600  |
| H | 2.97151500  | 5.77429400 | 5.42457000  |
| H | 3.50771100  | 4.22781200 | 6.12870900  |
| C | 4.19513000  | 4.00019000 | 2.37094500  |
| C | 4.52247200  | 5.29746200 | 2.18181300  |
| C | 3.56708400  | 6.43589200 | 2.48608700  |
| C | 5.89207400  | 5.79496600 | 1.76258400  |
| C | 3.54035900  | 7.50381200 | 1.38426900  |
| H | 3.89782500  | 6.92278900 | 3.41850800  |
| H | 2.55494300  | 6.05677200 | 2.66210500  |
| C | 5.83461500  | 6.83609900 | 0.63636400  |
| H | 6.34715900  | 6.28169600 | 2.64080700  |
| H | 6.56483300  | 4.98368300 | 1.48267200  |
| C | 4.93810700  | 8.00735300 | 1.03312400  |
| H | 2.89361500  | 8.33160600 | 1.69576900  |
| H | 3.08229300  | 7.07568700 | 0.48676300  |
| H | 6.84892600  | 7.18397500 | 0.40978400  |
| H | 5.44877600  | 6.36677100 | -0.27964600 |
| H | 4.88485100  | 8.74444200 | 0.22441900  |
| H | 5.37723800  | 8.51672100 | 1.90291400  |

|   |             |             |             |
|---|-------------|-------------|-------------|
| C | 5.14234500  | 2.83527000  | 2.12873300  |
| C | 5.38427000  | 2.03120200  | 3.41630600  |
| C | 4.67533500  | 1.89765200  | 1.00547500  |
| H | 6.11491800  | 3.22950000  | 1.81215800  |
| C | 6.38105800  | 0.89209700  | 3.18362800  |
| H | 4.42509900  | 1.62332700  | 3.75772200  |
| H | 5.75204000  | 2.69770200  | 4.20752500  |
| C | 5.71606700  | 0.80785800  | 0.74501900  |
| H | 3.72888300  | 1.41866800  | 1.28648100  |
| H | 4.49127000  | 2.48757200  | 0.10214300  |
| C | 5.96282900  | -0.00733900 | 2.01662800  |
| H | 6.48809900  | 0.29669400  | 4.09850500  |
| H | 7.37126500  | 1.31934000  | 2.96857000  |
| H | 5.38034200  | 0.15438100  | -0.06915400 |
| H | 6.65915400  | 1.27158100  | 0.41723200  |
| H | 6.73046900  | -0.77038700 | 1.84044900  |
| H | 5.03628800  | -0.53926400 | 2.27629400  |
| C | 0.90893100  | 2.69742000  | 3.57759600  |
| C | 1.36426600  | 3.51332900  | 4.63888300  |
| C | -0.29235000 | 1.98614400  | 3.73278900  |
| C | 0.64856600  | 3.66445300  | 5.83236100  |
| C | -1.00899100 | 2.13721200  | 4.91059000  |
| H | -0.62268000 | 1.30486100  | 2.95614900  |
| C | -0.54746400 | 2.97280100  | 5.94778400  |
| H | 1.01261800  | 4.29796700  | 6.63599700  |
| H | -1.93624900 | 1.58884200  | 5.04591900  |
| H | -1.13116400 | 3.06583400  | 6.85863100  |
| H | 3.46194800  | 5.50896500  | -1.08882800 |
| C | -4.19541000 | 3.20123900  | -0.64899700 |
| H | -4.77101500 | 2.72868100  | -1.45112800 |
| H | -4.84867800 | 3.31647500  | 0.22250600  |
| H | -3.90493100 | 4.20231700  | -0.98638300 |
| C | -2.17861200 | 2.99010300  | 0.86617300  |
| H | -1.26053300 | 2.42636800  | 1.06283800  |
| H | -1.90037700 | 4.02613600  | 0.63727700  |
| H | -2.77384100 | 3.00176400  | 1.78649600  |
| C | -1.15357200 | 5.00770900  | -4.84088500 |
| H | -0.81661700 | 5.95206700  | -5.28208800 |
| H | -1.28978500 | 4.28077400  | -5.64944900 |
| H | -2.12667800 | 5.17199400  | -4.36878300 |
| C | 1.24303500  | 4.33054900  | -4.48382700 |
| H | 1.18184900  | 3.71856300  | -5.39071000 |
| H | 1.63253300  | 5.31030600  | -4.78049900 |
| H | 1.96566200  | 3.86284600  | -3.80905000 |

|   |             |             |             |
|---|-------------|-------------|-------------|
| C | -1.32254600 | -0.58429400 | -5.29360100 |
| H | -2.40111200 | -0.40740800 | -5.26204600 |
| H | -0.88090300 | 0.18206300  | -5.94075600 |
| H | -1.14918200 | -1.55953200 | -5.76048500 |
| C | 0.81398600  | -0.81278600 | -4.00727400 |
| H | 0.97947100  | -1.76429800 | -4.52367400 |
| H | 1.32697200  | -0.03227000 | -4.58035000 |
| H | 1.27399000  | -0.88753700 | -3.01979700 |
| C | 2.56107500  | -0.23043800 | 4.32003000  |
| H | 3.63438800  | -0.27890800 | 4.54230100  |
| H | 2.42009300  | 0.10373800  | 3.28843000  |
| H | 2.11801300  | 0.52214000  | 4.98255600  |
| C | 2.15336900  | -2.06409300 | 5.97825100  |
| H | 1.78683800  | -1.32309400 | 6.69649800  |
| H | 1.67057500  | -3.02106800 | 6.19696300  |
| H | 3.22919000  | -2.19267200 | 6.14608100  |
| C | 6.28611300  | -5.13055300 | 2.59544300  |
| H | 7.37336700  | -5.19330600 | 2.47889000  |
| H | 6.03560400  | -5.34650100 | 3.63808200  |
| H | 5.83467700  | -5.91140900 | 1.97320000  |
| C | 6.16602900  | -3.43515000 | 0.73225600  |
| H | 7.25589600  | -3.42602500 | 0.62141100  |
| H | 5.76745400  | -4.19223800 | 0.04797800  |
| H | 5.77550900  | -2.46206500 | 0.41872400  |
| C | 1.32138200  | -4.93912100 | -0.55056000 |
| H | 1.13995600  | -3.88637200 | -0.78198600 |
| H | 2.33914300  | -5.19336500 | -0.86748300 |
| H | 0.62886200  | -5.54967200 | -1.14024000 |
| C | 1.38911300  | -6.68677200 | 1.27439900  |
| H | 2.42192200  | -6.96565000 | 1.03832800  |
| H | 1.22140100  | -6.88834700 | 2.33687200  |
| H | 0.72543000  | -7.33364700 | 0.69063600  |

**( $R_a, R$ )-TS1**

E = -4183.46963055 a.u.

0 1

|   |             |             |             |
|---|-------------|-------------|-------------|
| P | -0.33000700 | -1.05960000 | 0.62880400  |
| O | 0.17254500  | -0.48499600 | 1.90165600  |
| O | -0.44494100 | -2.69758400 | 0.65613100  |
| O | -1.92371200 | -0.63743900 | 0.55484100  |
| O | 0.32725300  | -0.75239800 | -0.70010100 |
| H | 0.61766000  | 0.66871400  | -0.61469800 |
| C | -2.83975500 | -3.71608700 | 3.23433300  |
| C | -2.32268800 | -3.34646200 | 1.98865000  |



|   |             |             |             |
|---|-------------|-------------|-------------|
| C | -0.95086500 | -3.20970600 | 1.83301900  |
| C | -0.06630400 | -3.56658800 | 2.86080700  |
| C | -0.61249500 | -4.02082900 | 4.06487800  |
| C | -1.99083700 | -4.06352600 | 4.27539600  |
| C | -4.35062500 | -3.63450600 | 3.21589200  |
| C | -4.62103800 | -2.83349700 | 1.92644500  |
| H | 0.06591500  | -4.32347300 | 4.85684900  |
| H | -2.38839500 | -4.36503200 | 5.24047300  |
| H | -4.80233100 | -4.63353900 | 3.16574700  |
| H | -5.60066300 | -3.03609600 | 1.48204400  |
| H | -4.55485300 | -1.76004300 | 2.13579000  |
| C | -3.45043900 | -3.22136100 | 0.98105800  |
| C | -3.37924200 | -2.33787700 | -0.25131300 |
| C | -3.75531200 | -4.59453300 | 0.31421700  |
| C | -4.15556600 | -2.88326500 | -1.27681100 |
| C | -2.70655500 | -1.13851800 | -0.45606000 |
| C | -4.66410300 | -4.25000500 | -0.87923400 |
| H | -2.81239400 | -5.01692400 | -0.05130700 |
| H | -4.19944700 | -5.30838200 | 1.01482500  |
| C | -4.34292500 | -2.19142700 | -2.46558000 |
| C | -2.84839800 | -0.43382600 | -1.66202100 |
| H | -4.59091600 | -4.97697200 | -1.69373500 |
| C | -3.70348700 | -0.96631400 | -2.63481300 |
| H | -4.96139300 | -2.60259000 | -3.25837500 |
| H | -3.83376000 | -0.41183000 | -3.56000400 |
| H | -5.71872700 | -4.20793700 | -0.57740300 |
| H | -4.75137100 | -3.14632600 | 4.10956600  |
| C | -2.09909000 | 0.82786900  | -1.95305700 |
| C | -1.17856000 | 0.85790800  | -3.02370200 |
| C | -2.33666200 | 2.00101100  | -1.20914900 |
| C | -0.55385300 | 2.06425600  | -3.35120200 |
| C | -1.67918400 | 3.17817000  | -1.57006500 |
| C | -0.79749800 | 3.23972300  | -2.64634700 |
| H | 0.14572500  | 2.07638600  | -4.18339400 |
| H | -1.86214100 | 4.08658900  | -0.99384200 |
| C | -0.84810400 | -0.36693300 | -3.86965000 |
| H | -1.34336600 | -1.23477000 | -3.42862800 |
| C | -3.29426500 | 2.04707200  | -0.02823600 |
| H | -3.76599100 | 1.06646300  | 0.07621600  |
| C | -0.18222200 | 4.57309600  | -3.03133600 |
| H | 0.05554800  | 5.09783900  | -2.09598600 |
| C | 1.41459100  | -3.49576600 | 2.66896000  |
| C | 2.19932300  | -2.64249600 | 3.47032900  |
| C | 2.03944700  | -4.32601900 | 1.71265700  |

|   |             |             |             |
|---|-------------|-------------|-------------|
| C | 3.59055400  | -2.68724400 | 3.34299300  |
| C | 3.42965400  | -4.31594500 | 1.60995300  |
| C | 4.22670900  | -3.51628700 | 2.42572700  |
| H | 4.20225000  | -2.04573200 | 3.97609800  |
| H | 3.90415900  | -4.96130900 | 0.87256700  |
| C | 1.59868100  | -1.65534000 | 4.46103200  |
| H | 0.52532200  | -1.59010500 | 4.26473500  |
| C | 1.26935300  | -5.25627300 | 0.78605900  |
| H | 0.20209300  | -5.15996100 | 0.99791300  |
| C | 5.73766200  | -3.54024900 | 2.30618300  |
| H | 6.13441700  | -2.84315400 | 3.05630700  |
| C | 0.36115900  | 8.34834900  | 0.72184000  |
| C | 1.24599700  | 7.91310700  | -0.26110900 |
| C | 1.54765600  | 6.56244400  | -0.35545000 |
| C | 0.99073000  | 5.61096800  | 0.51730900  |
| C | -0.00117200 | 6.06783700  | 1.42881700  |
| C | -0.27472400 | 7.43344900  | 1.55356900  |
| H | 0.12926600  | 9.40430000  | 0.82039500  |
| H | 1.68892700  | 8.61663000  | -0.95754600 |
| H | 2.18508300  | 6.22176300  | -1.16132700 |
| H | -1.00355200 | 7.77954900  | 2.27541400  |
| C | 1.24581600  | 4.17814600  | 0.39888300  |
| H | 0.40158500  | 3.55144600  | 0.67800500  |
| C | 2.15016700  | 3.55941800  | -0.53100500 |
| C | 1.83217600  | 2.21451900  | -0.89248700 |
| C | 3.36758100  | 4.11465200  | -0.97887400 |
| C | 2.69336300  | 1.52171100  | -1.76616100 |
| C | 4.20746700  | 3.41423100  | -1.82031700 |
| C | 3.85592100  | 2.11276600  | -2.22718700 |
| H | 2.44018900  | 0.50299200  | -2.03904700 |
| H | 4.50591900  | 1.54379600  | -2.88277200 |
| O | 5.38118800  | 4.03355800  | -2.15541300 |
| C | 6.33917200  | 3.27062100  | -2.85420700 |
| H | 5.97881400  | 2.98665000  | -3.85031400 |
| H | 7.21673800  | 3.90870800  | -2.95942200 |
| H | 6.61116600  | 2.36512800  | -2.29654500 |
| O | -0.66320400 | 5.12335100  | 2.11503200  |
| C | -1.79600900 | 5.50702300  | 2.87509800  |
| H | -2.22687200 | 4.57723200  | 3.24215400  |
| H | -1.50094300 | 6.13175800  | 3.72490800  |
| H | -2.51938600 | 6.03857400  | 2.24573800  |
| O | 0.76842400  | 1.67170400  | -0.35825400 |
| C | 3.07715900  | 4.23626600  | 2.69394300  |
| C | 2.15134000  | 3.24956400  | 2.28188400  |

|   |            |             |             |
|---|------------|-------------|-------------|
| N | 2.55864800 | 4.88365000  | 3.77584000  |
| H | 2.40142700 | 2.40339100  | 1.65987700  |
| C | 3.20026900 | 5.91008600  | 4.57170200  |
| H | 4.27025600 | 5.90574100  | 4.36332900  |
| H | 2.78922300 | 6.89878100  | 4.34440100  |
| H | 3.03875200 | 5.68428600  | 5.62836600  |
| C | 4.48902800 | 4.38627100  | 2.27081700  |
| C | 5.03119400 | 5.55489500  | 1.86153700  |
| C | 4.26186300 | 6.85769300  | 1.76875100  |
| C | 6.49985800 | 5.69938600  | 1.51290600  |
| C | 4.55407900 | 7.65896200  | 0.48957000  |
| H | 4.57198600 | 7.48692200  | 2.61902500  |
| H | 3.18360300 | 6.68982200  | 1.87005100  |
| C | 6.72800800 | 6.47508600  | 0.20860500  |
| H | 6.98709000 | 6.25272400  | 2.33188100  |
| H | 6.99707400 | 4.73183700  | 1.44341500  |
| C | 6.05172800 | 7.84161200  | 0.26349000  |
| H | 4.03853300 | 8.62340600  | 0.55224000  |
| H | 4.13527100 | 7.13928600  | -0.37978600 |
| H | 7.80490400 | 6.57980100  | 0.03908200  |
| H | 6.32135100 | 5.89386200  | -0.62996200 |
| H | 6.22891100 | 8.39861700  | -0.66244700 |
| H | 6.48345200 | 8.43352700  | 1.08298300  |
| C | 5.31477400 | 3.10253800  | 2.42046800  |
| C | 4.89061400 | 2.21971000  | 3.60756400  |
| C | 5.37456000 | 2.28827800  | 1.11791300  |
| H | 6.34140200 | 3.41255600  | 2.65096200  |
| C | 5.83613400 | 1.02497900  | 3.75034100  |
| H | 3.87247800 | 1.83995400  | 3.46524100  |
| H | 4.88105900 | 2.81749900  | 4.52884100  |
| C | 6.27727300 | 1.06155600  | 1.26781500  |
| H | 4.36251200 | 1.96594100  | 0.83211100  |
| H | 5.73280300 | 2.93518200  | 0.30675800  |
| C | 5.86564000 | 0.19897000  | 2.46285900  |
| H | 5.52302100 | 0.40163600  | 4.59566700  |
| H | 6.85075800 | 1.38253400  | 3.97819100  |
| H | 6.25648000 | 0.47107100  | 0.34427200  |
| H | 7.31533500 | 1.39681000  | 1.40856800  |
| H | 6.55637900 | -0.64489900 | 2.56991800  |
| H | 4.86783600 | -0.22897800 | 2.28454800  |
| C | 1.11261500 | 3.21087400  | 3.28300900  |
| C | 1.36053100 | 4.27573600  | 4.16292700  |
| C | 0.03443500 | 2.34962100  | 3.49961400  |
| C | 0.52574600 | 4.56412000  | 5.24031300  |

|   |             |             |             |
|---|-------------|-------------|-------------|
| C | -0.78636800 | 2.61076600  | 4.59126500  |
| H | -0.11047000 | 1.47482800  | 2.86614100  |
| C | -0.55240700 | 3.70708400  | 5.43951600  |
| H | 0.70977800  | 5.40030100  | 5.90780800  |
| H | -1.61865100 | 1.94555700  | 4.79941700  |
| H | -1.21812900 | 3.88295600  | 6.27905000  |
| H | 3.71385400  | 5.07038200  | -0.60565600 |
| C | -4.41180700 | 3.07332000  | -0.25114000 |
| H | -4.95451600 | 2.87238500  | -1.17987000 |
| H | -5.12634900 | 3.04412900  | 0.57869300  |
| H | -4.01132900 | 4.09199400  | -0.30971100 |
| C | -2.52847500 | 2.33778400  | 1.26598800  |
| H | -1.77047300 | 1.57123100  | 1.43846200  |
| H | -2.02768500 | 3.31172000  | 1.21174800  |
| H | -3.20985200 | 2.35143200  | 2.12660800  |
| C | -1.20851200 | 5.42686800  | -3.78947300 |
| H | -0.79486500 | 6.41210500  | -4.03240000 |
| H | -1.49048500 | 4.93193500  | -4.72546000 |
| H | -2.11813700 | 5.56891200  | -3.19843600 |
| C | 1.10682300  | 4.45028000  | -3.84342000 |
| H | 0.89969800  | 4.08399100  | -4.85553300 |
| H | 1.58647200  | 5.43020600  | -3.94351700 |
| H | 1.81729300  | 3.76334900  | -3.37320300 |
| C | -1.36887000 | -0.19049400 | -5.30274300 |
| H | -2.44163800 | 0.02535200  | -5.32220800 |
| H | -0.85653600 | 0.63997100  | -5.80220200 |
| H | -1.19012000 | -1.09707400 | -5.89072300 |
| C | 0.65206400  | -0.68124800 | -3.88559800 |
| H | 0.84396100  | -1.54336800 | -4.53420400 |
| H | 1.23928500  | 0.16069300  | -4.27199100 |
| H | 0.98713300  | -0.92554400 | -2.87529100 |
| C | 2.17432200  | -0.24749800 | 4.26488800  |
| H | 3.23683600  | -0.20856400 | 4.53611900  |
| H | 2.05126400  | 0.06370800  | 3.22352100  |
| H | 1.64614200  | 0.46849600  | 4.90486400  |
| C | 1.82453500  | -2.11065600 | 5.90873300  |
| H | 1.37833300  | -1.39685500 | 6.60998300  |
| H | 1.39015200  | -3.09561000 | 6.10255700  |
| H | 2.89705100  | -2.17294500 | 6.12866400  |
| C | 6.30519900  | -4.93081000 | 2.61204100  |
| H | 7.39959100  | -4.92344800 | 2.56523500  |
| H | 6.00228700  | -5.26818700 | 3.60743000  |
| H | 5.94309300  | -5.66555800 | 1.88463100  |
| C | 6.19320500  | -3.06201600 | 0.92282700  |

|   |            |             |             |
|---|------------|-------------|-------------|
| H | 7.28633900 | -3.00505500 | 0.86969900  |
| H | 5.85387400 | -3.75470700 | 0.14472100  |
| H | 5.77968800 | -2.07517600 | 0.69230300  |
| C | 1.48574300 | -4.87256300 | -0.68302500 |
| H | 1.21552600 | -3.82721500 | -0.85339100 |
| H | 2.53259900 | -5.01624200 | -0.97526600 |
| H | 0.86975100 | -5.50315600 | -1.33376300 |
| C | 1.64763000 | -6.72173400 | 1.03569800  |
| H | 2.70491200 | -6.90314200 | 0.81272300  |
| H | 1.47148600 | -7.00111200 | 2.07913300  |
| H | 1.05362200 | -7.38350200 | 0.39614600  |

**(R<sub>a</sub>,R)-Int2**

E = -4183.48853223 a.u.

0 1

|   |             |             |             |
|---|-------------|-------------|-------------|
| P | -0.31159200 | -1.10086300 | 0.56886500  |
| O | 0.20695200  | -0.51574200 | 1.83412600  |
| O | -0.46152100 | -2.74024200 | 0.65995300  |
| O | -1.90703700 | -0.65977400 | 0.52228600  |
| O | 0.32877200  | -0.85196200 | -0.76957600 |
| H | 0.75019500  | 0.67236600  | -0.69848200 |
| C | -2.86187000 | -3.66025600 | 3.26562100  |
| C | -2.34018400 | -3.32881400 | 2.01144400  |
| C | -0.96756900 | -3.20216900 | 1.85269100  |
| C | -0.08682700 | -3.52566100 | 2.89595400  |
| C | -0.63727700 | -3.94092200 | 4.11208700  |
| C | -2.01655500 | -3.97754100 | 4.31941100  |
| C | -4.37257400 | -3.57757300 | 3.23858800  |
| C | -4.63555800 | -2.80681300 | 1.92936600  |
| H | 0.03787300  | -4.22044400 | 4.91538900  |
| H | -2.41734200 | -4.25104500 | 5.29155300  |
| H | -4.82445900 | -4.57741800 | 3.20859400  |
| H | -5.61456300 | -3.01604300 | 1.48663100  |
| H | -4.56620700 | -1.72881000 | 2.11344900  |
| C | -3.46305800 | -3.22011700 | 0.99660400  |
| C | -3.38294400 | -2.35836400 | -0.25077500 |
| C | -3.77362700 | -4.60267500 | 0.35316500  |
| C | -4.16100800 | -2.91571000 | -1.26864000 |
| C | -2.70354600 | -1.16627900 | -0.47394700 |
| C | -4.67640700 | -4.27386400 | -0.84971700 |
| H | -2.83174500 | -5.03644000 | -0.00148000 |
| H | -4.22459300 | -5.30182000 | 1.06440300  |
| C | -4.34316000 | -2.24161400 | -2.46831800 |
| C | -2.84786900 | -0.47534800 | -1.68784900 |

|   |             |             |             |
|---|-------------|-------------|-------------|
| H | -4.60286100 | -5.01491400 | -1.65146100 |
| C | -3.70209300 | -1.01899300 | -2.65427000 |
| H | -4.96072000 | -2.66340200 | -3.25630100 |
| H | -3.83312300 | -0.47623500 | -3.58618600 |
| H | -5.73211200 | -4.22316600 | -0.55271400 |
| H | -4.77814900 | -3.06923900 | 4.11888700  |
| C | -2.10263900 | 0.78994900  | -1.97062400 |
| C | -1.15860600 | 0.82955800  | -3.01894100 |
| C | -2.35994600 | 1.95654200  | -1.22231900 |
| C | -0.51852200 | 2.03658700  | -3.31441700 |
| C | -1.67764700 | 3.12974800  | -1.54190700 |
| C | -0.76320500 | 3.19956600  | -2.59087800 |
| H | 0.20113900  | 2.05710300  | -4.12882300 |
| H | -1.86698600 | 4.03096100  | -0.95637200 |
| C | -0.82657400 | -0.38502400 | -3.87803900 |
| H | -1.31009200 | -1.25987700 | -3.43711900 |
| C | -3.39102400 | 2.00867900  | -0.10356100 |
| H | -3.87856300 | 1.03208700  | -0.03444700 |
| C | -0.11070100 | 4.53274600  | -2.91071900 |
| H | 0.19097500  | 4.97293400  | -1.95135600 |
| C | 1.39475600  | -3.45712900 | 2.70627100  |
| C | 2.17652000  | -2.57888600 | 3.48374600  |
| C | 2.02446700  | -4.30807000 | 1.77162300  |
| C | 3.56764500  | -2.61826300 | 3.35551400  |
| C | 3.41465900  | -4.29122700 | 1.66564100  |
| C | 4.20804600  | -3.46523900 | 2.45782700  |
| H | 4.17737300  | -1.95799700 | 3.97125300  |
| H | 3.89148200  | -4.95115600 | 0.94283300  |
| C | 1.57264700  | -1.56907600 | 4.44998100  |
| H | 0.50009600  | -1.50787900 | 4.24754500  |
| C | 1.26021300  | -5.26724600 | 0.87015300  |
| H | 0.19238500  | -5.16988200 | 1.07781100  |
| C | 5.71858500  | -3.47564700 | 2.33075800  |
| H | 6.11229300  | -2.76708700 | 3.07218100  |
| C | 0.27790200  | 8.23680800  | 0.59457400  |
| C | 1.21436600  | 7.78328800  | -0.32000900 |
| C | 1.59139200  | 6.43931400  | -0.31367700 |
| C | 1.07088800  | 5.51687900  | 0.59498300  |
| C | 0.02708000  | 5.98449100  | 1.43009800  |
| C | -0.33142100 | 7.33300200  | 1.46187800  |
| H | -0.01618200 | 9.28139700  | 0.61666700  |
| H | 1.65367600  | 8.45918100  | -1.04635700 |
| H | 2.28072100  | 6.09873700  | -1.07399400 |
| H | -1.11038200 | 7.67427600  | 2.13256200  |

|   |             |            |             |
|---|-------------|------------|-------------|
| C | 1.43169700  | 4.03316700 | 0.59759000  |
| H | 0.48370500  | 3.48714600 | 0.52788500  |
| C | 2.30728200  | 3.50404200 | -0.52048700 |
| C | 1.97964200  | 2.19801600 | -0.95989200 |
| C | 3.48601900  | 4.08514600 | -0.97510200 |
| C | 2.80498400  | 1.55776500 | -1.88578400 |
| C | 4.30873900  | 3.44012900 | -1.89948400 |
| C | 3.96357400  | 2.17425800 | -2.36267300 |
| H | 2.54290700  | 0.55636100 | -2.21110900 |
| H | 4.58673200  | 1.64357400 | -3.07338700 |
| O | 5.45902900  | 4.11315700 | -2.22908300 |
| C | 6.35653700  | 3.44857400 | -3.08651600 |
| H | 5.90163400  | 3.24739000 | -4.06424200 |
| H | 7.20918100  | 4.11574400 | -3.21610100 |
| H | 6.69712000  | 2.50063300 | -2.64958100 |
| O | -0.62224500 | 5.04059400 | 2.15165800  |
| C | -1.74522600 | 5.41817500 | 2.91854300  |
| H | -2.14027600 | 4.49202900 | 3.33514500  |
| H | -1.45719800 | 6.09401300 | 3.73357700  |
| H | -2.50649700 | 5.89696400 | 2.29121100  |
| O | 0.91428800  | 1.62456200 | -0.39936000 |
| C | 3.06436500  | 4.31372100 | 2.62180500  |
| C | 2.05394400  | 3.42207900 | 1.95372500  |
| N | 2.59162800  | 4.70327600 | 3.78382000  |
| H | 2.52112200  | 2.48576000 | 1.63306400  |
| C | 3.25317900  | 5.57265900 | 4.74526700  |
| H | 4.28175300  | 5.73659900 | 4.42863300  |
| H | 2.71854300  | 6.52476700 | 4.79313900  |
| H | 3.23019500  | 5.08641900 | 5.72264500  |
| C | 4.47705800  | 4.50465400 | 2.23279600  |
| C | 5.01129000  | 5.69613000 | 1.90264400  |
| C | 4.22464700  | 6.98910600 | 1.86931400  |
| C | 6.47579000  | 5.86251000 | 1.55897500  |
| C | 4.48631000  | 7.80992100 | 0.59549200  |
| H | 4.54996600  | 7.59569200 | 2.73066600  |
| H | 3.14870600  | 6.81027800 | 1.98237400  |
| C | 6.67735300  | 6.66048200 | 0.26264600  |
| H | 6.95507900  | 6.41418700 | 2.38298300  |
| H | 6.98377100  | 4.90105900 | 1.47569400  |
| C | 5.97833500  | 8.01486000 | 0.34824100  |
| H | 3.95552600  | 8.76444200 | 0.67306400  |
| H | 4.05983700  | 7.28474100 | -0.26579500 |
| H | 7.75045900  | 6.78559200 | 0.08519800  |
| H | 6.27440800  | 6.08326200 | -0.58055100 |

|   |             |             |             |
|---|-------------|-------------|-------------|
| H | 6.13047800  | 8.58437800  | -0.57421800 |
| H | 6.41696500  | 8.60418600  | 1.16596800  |
| C | 5.28435400  | 3.20363800  | 2.37954200  |
| C | 4.80958800  | 2.32360800  | 3.55326000  |
| C | 5.39472300  | 2.39128900  | 1.07895600  |
| H | 6.30090700  | 3.51576400  | 2.64981200  |
| C | 5.73908600  | 1.12041400  | 3.72792600  |
| H | 3.79070800  | 1.94874300  | 3.38256100  |
| H | 4.78091900  | 2.91756200  | 4.47755600  |
| C | 6.28790700  | 1.16316000  | 1.27102300  |
| H | 4.40068100  | 2.06513300  | 0.74295400  |
| H | 5.78824800  | 3.03612100  | 0.28401300  |
| C | 5.81451300  | 0.29803700  | 2.44078700  |
| H | 5.39135700  | 0.50066100  | 4.56153700  |
| H | 6.74479200  | 1.47629500  | 3.99390500  |
| H | 6.30603600  | 0.57919400  | 0.34427900  |
| H | 7.31975600  | 1.49218700  | 1.46224100  |
| H | 6.49113800  | -0.55266900 | 2.57695500  |
| H | 4.82166100  | -0.12054200 | 2.21846100  |
| C | 1.07800000  | 3.17101400  | 3.05855500  |
| C | 1.37551500  | 4.02436400  | 4.11081400  |
| C | 0.04211500  | 2.25993400  | 3.16071700  |
| C | 0.63385900  | 4.08433000  | 5.28000300  |
| C | -0.71164000 | 2.28296300  | 4.33710100  |
| H | -0.12084900 | 1.50905300  | 2.38917000  |
| C | -0.43528700 | 3.18904100  | 5.36747600  |
| H | 0.87002300  | 4.76381400  | 6.09237700  |
| H | -1.51680900 | 1.56462200  | 4.45682900  |
| H | -1.04339000 | 3.18140600  | 6.26619100  |
| H | 3.84400300  | 5.02825600  | -0.57739600 |
| C | -4.48120700 | 3.04430800  | -0.40812300 |
| H | -4.94817400 | 2.85176900  | -1.37879600 |
| H | -5.26043100 | 3.01606700  | 0.36147400  |
| H | -4.06954000 | 4.05988800  | -0.42951400 |
| C | -2.72584600 | 2.29129500  | 1.24700200  |
| H | -2.05520300 | 1.46993100  | 1.50507700  |
| H | -2.14210600 | 3.21991300  | 1.21344500  |
| H | -3.48127400 | 2.38891800  | 2.03778100  |
| C | -1.13100300 | 5.48500500  | -3.55015900 |
| H | -0.68675800 | 6.47201200  | -3.72202000 |
| H | -1.46715700 | 5.08604400  | -4.51384900 |
| H | -2.01192600 | 5.60993800  | -2.91344600 |
| C | 1.13532400  | 4.42739700  | -3.78764700 |
| H | 0.87345900  | 4.11679400  | -4.80611400 |



|   |             |             |             |
|---|-------------|-------------|-------------|
| H | 1.62719400  | 5.40395900  | -3.85939500 |
| H | 1.85423300  | 3.70797700  | -3.38423300 |
| C | -1.36620100 | -0.19677200 | -5.30284200 |
| H | -2.44124500 | 0.00835800  | -5.30825200 |
| H | -0.86786800 | 0.64647700  | -5.79525100 |
| H | -1.18423500 | -1.09329500 | -5.90536100 |
| C | 0.67491000  | -0.68901700 | -3.91882800 |
| H | 0.85971500  | -1.55620000 | -4.56292700 |
| H | 1.24909400  | 0.15209600  | -4.32564900 |
| H | 1.03001100  | -0.92102000 | -2.91270800 |
| C | 2.14941600  | -0.16651200 | 4.22183500  |
| H | 3.21464800  | -0.12726500 | 4.48077200  |
| H | 2.01335700  | 0.12033100  | 3.17477000  |
| H | 1.63141400  | 0.56298800  | 4.85623600  |
| C | 1.79540200  | -1.98949100 | 5.90861500  |
| H | 1.34557900  | -1.26120900 | 6.59288900  |
| H | 1.36302800  | -2.97062700 | 6.12378800  |
| H | 2.86759700  | -2.04462000 | 6.13253900  |
| C | 6.30373000  | -4.85649700 | 2.64675500  |
| H | 7.39773800  | -4.83684000 | 2.59457000  |
| H | 6.00929600  | -5.18843100 | 3.64652400  |
| H | 5.94730600  | -5.60209800 | 1.92776400  |
| C | 6.16067500  | -3.00587400 | 0.93994500  |
| H | 7.25296100  | -2.94105100 | 0.87792000  |
| H | 5.82054900  | -3.70810400 | 0.17091400  |
| H | 5.73702900  | -2.02497400 | 0.70232500  |
| C | 1.47741800  | -4.92358600 | -0.60871400 |
| H | 1.20750300  | -3.88334100 | -0.80797300 |
| H | 2.52421300  | -5.07630100 | -0.89678600 |
| H | 0.86128900  | -5.57177300 | -1.24176800 |
| C | 1.64536300  | -6.72316500 | 1.16192900  |
| H | 2.70419900  | -6.90544000 | 0.94685400  |
| H | 1.46753100  | -6.97456600 | 2.21224700  |
| H | 1.05656300  | -7.40540000 | 0.53931500  |

**(S<sub>a</sub>,S)-Int1**

E = -4183.49348136 a.u.

0 1

|   |             |            |             |
|---|-------------|------------|-------------|
| C | -7.83671000 | 1.26537200 | -5.22874800 |
| C | -7.89973100 | 1.83794300 | -6.49424600 |
| C | -8.26726600 | 3.17524800 | -6.62440500 |
| C | -8.59753500 | 3.94398300 | -5.50473800 |
| C | -8.53664400 | 3.34014600 | -4.22903900 |
| C | -8.14320500 | 2.01123700 | -4.08976300 |

|   |              |             |             |
|---|--------------|-------------|-------------|
| H | -7.54710600  | 0.22489500  | -5.11581900 |
| H | -7.67417600  | 1.24658200  | -7.37569600 |
| H | -8.35605200  | 3.62846200  | -7.60784600 |
| H | -8.08530700  | 1.54821100  | -3.11200200 |
| C | -9.15220500  | 5.28845800  | -5.61086200 |
| H | -9.99146800  | 5.50971600  | -4.95323100 |
| C | -8.76394400  | 6.30433500  | -6.42237000 |
| C | -9.62604400  | 7.51489900  | -6.36898600 |
| C | -7.52681200  | 6.34429000  | -7.17847000 |
| C | -9.21156800  | 8.67790000  | -7.14059800 |
| C | -7.18575800  | 7.47917300  | -7.83547100 |
| H | -6.85489400  | 5.49563200  | -7.10405000 |
| C | -8.06505800  | 8.63735200  | -7.84565400 |
| H | -9.85167700  | 9.55597200  | -7.12678900 |
| H | -7.74008000  | 9.49752900  | -8.42401500 |
| O | -6.03269900  | 7.69891000  | -8.51058100 |
| C | -5.03773400  | 6.70748300  | -8.39218300 |
| H | -5.37184600  | 5.75394300  | -8.82348300 |
| H | -4.17120200  | 7.07258900  | -8.94492600 |
| H | -4.77825700  | 6.55218200  | -7.33765000 |
| O | -8.87318300  | 4.14944900  | -3.19337500 |
| C | -8.85994600  | 3.60823200  | -1.88847500 |
| H | -7.84980000  | 3.28988900  | -1.60499200 |
| H | -9.18732200  | 4.41241300  | -1.22922700 |
| H | -9.54840500  | 2.75940900  | -1.80495700 |
| O | -10.67170400 | 7.51737600  | -5.69644600 |
| C | -4.93798800  | 7.25482500  | -4.74818600 |
| C | -5.96489800  | 6.52864000  | -4.10219800 |
| C | -7.17314900  | 7.18087900  | -3.80914700 |
| C | -7.33609900  | 8.50028200  | -4.19635400 |
| C | -6.31187400  | 9.19233200  | -4.87502900 |
| C | -5.09608800  | 8.58565200  | -5.15145700 |
| C | -4.16912100  | 5.17355100  | -4.36876200 |
| C | -5.45362300  | 5.20455300  | -3.88773300 |
| H | -7.97548100  | 6.64153300  | -3.31190100 |
| H | -8.27277700  | 9.01429500  | -3.99352100 |
| H | -6.48986900  | 10.21746700 | -5.19209900 |
| H | -4.30434800  | 9.11652200  | -5.67413200 |
| N | -3.85133300  | 6.41935800  | -4.89698500 |
| C | -2.56078700  | 6.85420800  | -5.37850500 |
| H | -2.59614800  | 7.09695100  | -6.44747700 |
| H | -2.23409900  | 7.74315700  | -4.82890800 |
| H | -1.83787900  | 6.05273000  | -5.21855000 |
| C | -3.20570100  | 4.04168600  | -4.39139100 |

|   |              |             |             |
|---|--------------|-------------|-------------|
| C | -3.28400200  | 3.13029000  | -5.60731400 |
| C | -4.42823200  | 2.11384700  | -5.45071100 |
| C | -3.47368600  | 3.90632600  | -6.91921800 |
| H | -2.34310900  | 2.57299500  | -5.69740700 |
| C | -4.51560100  | 1.17279700  | -6.65434400 |
| H | -5.37207400  | 2.66933900  | -5.34664300 |
| H | -4.28831400  | 1.54382000  | -4.52332200 |
| C | -3.53179600  | 2.96576100  | -8.12402800 |
| H | -4.41808100  | 4.46384400  | -6.85264000 |
| H | -2.67073900  | 4.64304000  | -7.04898700 |
| C | -4.66646600  | 1.95407200  | -7.96107700 |
| H | -5.35246800  | 0.47684400  | -6.52635300 |
| H | -3.60231800  | 0.56281800  | -6.70461200 |
| H | -3.66306900  | 3.54279100  | -9.04694400 |
| H | -2.57551100  | 2.43248100  | -8.21824700 |
| H | -4.70018100  | 1.27020100  | -8.81661900 |
| H | -5.62148400  | 2.49832500  | -7.94254800 |
| C | -2.39589100  | 3.83487100  | -3.33688600 |
| C | -1.48945500  | 2.63781000  | -3.16716900 |
| C | -2.37667900  | 4.74145700  | -2.12700500 |
| C | -1.90153500  | 1.84497600  | -1.91336100 |
| H | -0.45523300  | 2.98719000  | -3.03247900 |
| H | -1.49759100  | 1.97930900  | -4.03794900 |
| C | -2.79180500  | 3.96162300  | -0.86924500 |
| H | -1.35070500  | 5.11282600  | -1.98318400 |
| H | -3.02551600  | 5.60906100  | -2.26853400 |
| C | -1.90263300  | 2.73343500  | -0.66827900 |
| H | -1.22790500  | 0.99207800  | -1.77650400 |
| H | -2.90980400  | 1.43908300  | -2.07072300 |
| H | -2.74844100  | 4.61593600  | 0.00794800  |
| H | -3.83699200  | 3.64518500  | -0.98617500 |
| H | -2.23120300  | 2.16105500  | 0.20610000  |
| H | -0.87479000  | 3.06439100  | -0.46343300 |
| P | -11.61252700 | 10.91453100 | -5.19741800 |
| O | -11.42966300 | 11.00546400 | -6.65467500 |
| O | -10.98989900 | 12.11640200 | -4.31264100 |
| O | -13.19153300 | 10.96680000 | -4.85164100 |
| O | -10.99518600 | 9.70217900  | -4.42106200 |
| H | -10.99409500 | 8.84324600  | -4.96831400 |
| C | -12.96411800 | 15.14752100 | -4.90229900 |
| C | -12.52716400 | 13.94989700 | -4.32897100 |
| C | -11.34383700 | 13.38092400 | -4.77244200 |
| C | -10.51149200 | 14.02779600 | -5.69365700 |
| C | -10.93678200 | 15.26972700 | -6.17859100 |

|   |              |             |             |
|---|--------------|-------------|-------------|
| C | -12.16759700 | 15.81810000 | -5.82001700 |
| C | -14.34510000 | 15.49471000 | -4.39186800 |
| C | -14.79718800 | 14.17243700 | -3.74006000 |
| H | -10.29205600 | 15.79710200 | -6.87475500 |
| H | -12.49559700 | 16.75599300 | -6.25888600 |
| H | -14.30276700 | 16.30781600 | -3.65618200 |
| H | -15.53273900 | 14.30724300 | -2.94112500 |
| H | -15.23381800 | 13.51497500 | -4.50003300 |
| C | -13.48002100 | 13.52650400 | -3.22665900 |
| C | -13.66846300 | 12.08309900 | -2.79500300 |
| C | -13.07935100 | 14.16831800 | -1.86627100 |
| C | -14.00706700 | 12.02795900 | -1.43986900 |
| C | -13.57867700 | 10.90405700 | -3.52058500 |
| C | -13.90852800 | 13.40258700 | -0.81966000 |
| H | -12.01238500 | 13.98395400 | -1.69697400 |
| H | -13.24413900 | 15.24990300 | -1.85344200 |
| C | -14.34188900 | 10.81960900 | -0.84536700 |
| C | -13.88010500 | 9.66102400  | -2.94604700 |
| H | -13.43534900 | 13.38390200 | 0.16646200  |
| C | -14.29586500 | 9.65579900  | -1.60929000 |
| H | -14.62352700 | 10.77553100 | 0.20276000  |
| H | -14.56306600 | 8.70395900  | -1.16086200 |
| H | -14.90234100 | 13.85085400 | -0.69339600 |
| H | -15.01410900 | 15.82102900 | -5.19351000 |
| C | -13.76159900 | 8.37664800  | -3.70375600 |
| C | -12.88372200 | 7.36387000  | -3.24759600 |
| C | -14.55840700 | 8.14632900  | -4.84287700 |
| C | -12.86305300 | 6.13775000  | -3.91075800 |
| C | -14.47937200 | 6.90751800  | -5.48337600 |
| C | -13.65238700 | 5.88635700  | -5.03121100 |
| H | -12.19420000 | 5.35800700  | -3.54852400 |
| H | -15.09858000 | 6.72773000  | -6.36028800 |
| C | -11.94729600 | 7.54491000  | -2.05728000 |
| H | -11.95859800 | 8.59866500  | -1.76559000 |
| C | -15.55190000 | 9.16282300  | -5.38785300 |
| H | -15.48906900 | 10.07411500 | -4.78894200 |
| C | -13.64396400 | 4.53512000  | -5.71937700 |
| H | -14.21518400 | 4.64204400  | -6.65051300 |
| C | -9.20462400  | 13.44493100 | -6.12988500 |
| C | -8.96944900  | 13.15619100 | -7.49445300 |
| C | -8.17014600  | 13.25638900 | -5.19395700 |
| C | -7.69133500  | 12.76240400 | -7.88883100 |
| C | -6.90979300  | 12.84748700 | -5.64223000 |
| C | -6.63623000  | 12.61684600 | -6.98615300 |

|   |              |             |              |
|---|--------------|-------------|--------------|
| H | -7.50350200  | 12.58151300 | -8.94602600  |
| H | -6.11915900  | 12.73184200 | -4.90639300  |
| C | -10.04850200 | 13.27067400 | -8.56361200  |
| H | -11.00894900 | 13.42471400 | -8.06428300  |
| C | -8.32820100  | 13.50908900 | -3.70103700  |
| H | -9.34677200  | 13.85255600 | -3.50539300  |
| C | -5.25154600  | 12.23840900 | -7.49470800  |
| H | -4.98190900  | 12.97963900 | -8.26050400  |
| H | -5.96362000  | 4.36928400  | -3.42628400  |
| C | -16.98814300 | 8.63833200  | -5.25853800  |
| H | -17.13526500 | 7.73491100  | -5.86030300  |
| H | -17.22486400 | 8.39229400  | -4.21865600  |
| H | -17.70244000 | 9.39221400  | -5.60631000  |
| C | -15.23397700 | 9.53853700  | -6.83995700  |
| H | -14.21213100 | 9.91476400  | -6.93653700  |
| H | -15.34899300 | 8.67462600  | -7.50415700  |
| H | -15.92261000 | 10.31646800 | -7.18701100  |
| C | -14.34602100 | 3.48359600  | -4.85140100  |
| H | -14.37325900 | 2.51306000  | -5.35846000  |
| H | -13.81217400 | 3.35585300  | -3.90273000  |
| H | -15.37215500 | 3.78442200  | -4.62055200  |
| C | -12.22991400 | 4.07576100  | -6.08525400  |
| H | -11.69702800 | 4.85085100  | -6.64501800  |
| H | -11.64580900 | 3.84844400  | -5.18512000  |
| H | -12.26372100 | 3.16328200  | -6.69003400  |
| C | -10.49530600 | 7.18543200  | -2.39919700  |
| H | -9.84320200  | 7.40869100  | -1.54631700  |
| H | -10.38522800 | 6.12008500  | -2.63408500  |
| H | -10.13606500 | 7.75300800  | -3.25964900  |
| C | -12.40849500 | 6.69969400  | -0.86153500  |
| H | -11.75467000 | 6.86435900  | 0.00199400   |
| H | -13.43469900 | 6.93182800  | -0.56281000  |
| H | -12.37363900 | 5.63308300  | -1.11400300  |
| C | -10.17596200 | 11.98374400 | -9.38814200  |
| H | -9.26025700  | 11.77321200 | -9.95276400  |
| H | -10.40476000 | 11.13642000 | -8.73999800  |
| H | -10.99039000 | 12.08810000 | -10.11303800 |
| C | -9.77597900  | 14.45947100 | -9.49565600  |
| H | -10.57829400 | 14.55895000 | -10.23435900 |
| H | -9.69623000  | 15.40340400 | -8.94843600  |
| H | -8.83528600  | 14.31385100 | -10.03929200 |
| C | -5.26478500  | 10.85980300 | -8.16652200  |
| H | -5.57638900  | 10.08516000 | -7.45821400  |
| H | -5.95112300  | 10.82765500 | -9.01827700  |

|   |             |             |             |
|---|-------------|-------------|-------------|
| H | -4.26669000 | 10.59862100 | -8.53670100 |
| C | -4.17186300 | 12.27796700 | -6.41357200 |
| H | -3.19416300 | 12.05608500 | -6.85245400 |
| H | -4.11351900 | 13.25850200 | -5.93129900 |
| H | -4.36538200 | 11.52964100 | -5.63507100 |
| C | -8.11271500 | 12.21673500 | -2.90325500 |
| H | -8.81219500 | 11.44130400 | -3.22743500 |
| H | -7.09219800 | 11.83674100 | -3.03056300 |
| H | -8.26969300 | 12.39810400 | -1.83434900 |
| C | -7.38289000 | 14.61818100 | -3.22135500 |
| H | -7.54443000 | 15.54294100 | -3.78381200 |
| H | -7.54987000 | 14.82649700 | -2.15926400 |
| H | -6.33342400 | 14.32878300 | -3.34222600 |

**(S<sub>a</sub>,S)-TS1**

E = -4183.46175681 a.u.

0 1

|   |             |            |              |
|---|-------------|------------|--------------|
| C | -8.37121800 | 1.30683900 | -6.41655000  |
| C | -8.16658400 | 2.27657300 | -7.39302700  |
| C | -7.94836200 | 3.59717200 | -7.01540600  |
| C | -7.92833800 | 3.97953800 | -5.66782900  |
| C | -8.18976100 | 2.98330700 | -4.69462600  |
| C | -8.39159200 | 1.65539800 | -5.06770800  |
| H | -8.54326500 | 0.27329500 | -6.69990900  |
| H | -8.20156700 | 2.01267900 | -8.44454400  |
| H | -7.85049200 | 4.36363100 | -7.77681100  |
| H | -8.58558700 | 0.89618800 | -4.32001000  |
| C | -7.90658900 | 5.38523000 | -5.24574100  |
| H | -8.52348500 | 5.56269900 | -4.36651200  |
| C | -7.85005400 | 6.51909500 | -6.11995800  |
| C | -8.71406000 | 7.61044400 | -5.81452300  |
| C | -6.92751600 | 6.63484900 | -7.19779300  |
| C | -8.61225100 | 8.79654800 | -6.57716300  |
| C | -6.86064600 | 7.79420700 | -7.93430600  |
| H | -6.24301100 | 5.81890800 | -7.38651500  |
| C | -7.71028400 | 8.87630100 | -7.60824000  |
| H | -9.27774200 | 9.63154500 | -6.37336500  |
| H | -7.64682400 | 9.78375000 | -8.20094500  |
| O | -6.01862900 | 8.00588000 | -8.98851800  |
| C | -5.28985000 | 6.89866200 | -9.45231300  |
| H | -5.95235700 | 6.05287600 | -9.68280800  |
| H | -4.77746900 | 7.22137800 | -10.35875200 |
| H | -4.54442700 | 6.56457400 | -8.71680700  |
| O | -8.27049300 | 3.41288700 | -3.41182700  |

|   |             |             |             |
|---|-------------|-------------|-------------|
| C | -8.82450200 | 2.53570900  | -2.44757100 |
| H | -8.16039000 | 1.68526900  | -2.25706200 |
| H | -8.93308900 | 3.12393700  | -1.53695500 |
| H | -9.80603800 | 2.17450100  | -2.77442700 |
| O | -9.61847300 | 7.45842200  | -4.86089700 |
| C | -5.35524300 | 7.61922900  | -4.51242500 |
| C | -6.33017800 | 7.02109200  | -3.70203900 |
| C | -7.27011100 | 7.82919200  | -3.06451700 |
| C | -7.23307700 | 9.19945200  | -3.29038400 |
| C | -6.26488500 | 9.77111200  | -4.13195300 |
| C | -5.29436200 | 8.98974400  | -4.74712900 |
| C | -4.98106900 | 5.39732600  | -4.59825600 |
| C | -6.18617100 | 5.58668800  | -3.87444600 |
| H | -8.04138700 | 7.39222700  | -2.44138100 |
| H | -7.98948200 | 9.83291400  | -2.83904700 |
| H | -6.29449000 | 10.83873700 | -4.32742500 |
| H | -4.54275900 | 9.42683800  | -5.39646900 |
| N | -4.53502400 | 6.60378400  | -5.01628500 |
| C | -3.30895000 | 6.89619600  | -5.72882300 |
| H | -3.53505800 | 7.24418100  | -6.74291200 |
| H | -2.77059300 | 7.68522800  | -5.19708500 |
| H | -2.68957100 | 5.99989500  | -5.76673300 |
| C | -4.11815000 | 4.17926500  | -4.62135400 |
| C | -3.94488600 | 3.30012800  | -5.85826000 |
| C | -4.71634400 | 1.97251800  | -5.73575200 |
| C | -4.32502000 | 3.95023000  | -7.19166100 |
| H | -2.87481600 | 3.05443600  | -5.92801800 |
| C | -4.37236000 | 1.02781100  | -6.88979400 |
| H | -5.79055200 | 2.19472300  | -5.74377000 |
| H | -4.50122400 | 1.49384100  | -4.77406800 |
| C | -3.94749100 | 3.03935900  | -8.36359700 |
| H | -5.40975800 | 4.11088300  | -7.20060100 |
| H | -3.84630200 | 4.92764600  | -7.31070300 |
| C | -4.63869500 | 1.67920100  | -8.24893800 |
| H | -4.94867800 | 0.10044800  | -6.79710400 |
| H | -3.31049300 | 0.75036600  | -6.82046200 |
| H | -4.21221700 | 3.52056200  | -9.31226100 |
| H | -2.85742200 | 2.90032800  | -8.37261100 |
| H | -4.31436700 | 1.01767600  | -9.05939200 |
| H | -5.72001700 | 1.82315500  | -8.36360200 |
| C | -3.46402100 | 3.90909200  | -3.47117500 |
| C | -2.57626500 | 2.70124900  | -3.26706400 |
| C | -3.56184500 | 4.73490800  | -2.20682600 |
| C | -3.13905100 | 1.82697800  | -2.13080200 |

|   |              |             |             |
|---|--------------|-------------|-------------|
| H | -1.57642100  | 3.05040100  | -2.97153400 |
| H | -2.45342900  | 2.10526900  | -4.17292500 |
| C | -4.13689900  | 3.88397000  | -1.06185100 |
| H | -2.54522500  | 5.04730600  | -1.92623600 |
| H | -4.15082500  | 5.64475700  | -2.33998400 |
| C | -3.29223200  | 2.62882200  | -0.83706200 |
| H | -2.48512800  | 0.96292100  | -1.97301100 |
| H | -4.12030600  | 1.43901900  | -2.43583000 |
| H | -4.18975300  | 4.48215700  | -0.14657200 |
| H | -5.16525400  | 3.59474600  | -1.31920000 |
| H | -3.73574700  | 2.00424700  | -0.05442900 |
| H | -2.29689900  | 2.92670900  | -0.47979400 |
| P | -11.25099000 | 10.74022400 | -4.90529800 |
| O | -11.03468400 | 10.79450000 | -6.37217400 |
| O | -10.85009300 | 12.16883900 | -4.17533400 |
| O | -12.88384500 | 10.75175200 | -4.69479400 |
| O | -10.59931700 | 9.68943100  | -4.04032500 |
| H | -10.07472100 | 8.34126500  | -4.61347400 |
| C | -13.04965100 | 14.90223700 | -5.23857100 |
| C | -12.54306300 | 13.82387600 | -4.50568000 |
| C | -11.29816300 | 13.29791500 | -4.82630600 |
| C | -10.49964000 | 13.89977700 | -5.81141900 |
| C | -10.99819800 | 15.03281100 | -6.46187000 |
| C | -12.27742200 | 15.52352400 | -6.20843500 |
| C | -14.47548400 | 15.19210800 | -4.82747600 |
| C | -14.85441700 | 13.91466000 | -4.05605400 |
| H | -10.36906500 | 15.51911800 | -7.20110900 |
| H | -12.66187400 | 16.37116000 | -6.76863300 |
| H | -14.53106100 | 16.07830400 | -4.18202000 |
| H | -15.64662200 | 14.06573200 | -3.31617700 |
| H | -15.18576600 | 13.14285300 | -4.75977600 |
| C | -13.52024400 | 13.44561000 | -3.40846900 |
| C | -13.64290600 | 12.04573600 | -2.83887500 |
| C | -13.26904500 | 14.25142100 | -2.10261100 |
| C | -14.12070600 | 12.10928400 | -1.52701500 |
| C | -13.41207500 | 10.80959600 | -3.42935900 |
| C | -14.13723800 | 13.54294100 | -1.04516300 |
| H | -12.21022100 | 14.15693900 | -1.83634900 |
| H | -13.49858800 | 15.31528600 | -2.21803800 |
| C | -14.48531100 | 10.95308900 | -0.85071900 |
| C | -13.75551200 | 9.62333800  | -2.76265500 |
| H | -13.73948000 | 13.64578300 | -0.03086500 |
| C | -14.32624900 | 9.72490200  | -1.48890600 |
| H | -14.87965100 | 10.99984400 | 0.16050000  |



|   |              |             |             |
|---|--------------|-------------|-------------|
| H | -14.61281400 | 8.80866400  | -0.97936500 |
| H | -15.15794000 | 13.94643500 | -1.03299800 |
| H | -15.12648100 | 15.37863200 | -5.68694700 |
| C | -13.48068200 | 8.29144300  | -3.37682300 |
| C | -12.61321300 | 7.38796100  | -2.72361800 |
| C | -14.07406200 | 7.92666100  | -4.60124200 |
| C | -12.37211800 | 6.14383400  | -3.30203200 |
| C | -13.78942400 | 6.67133600  | -5.14422000 |
| C | -12.94292700 | 5.76711200  | -4.51532900 |
| H | -11.69910800 | 5.45327200  | -2.79588500 |
| H | -14.24530400 | 6.39022500  | -6.09179200 |
| C | -11.90632300 | 7.70854000  | -1.41282400 |
| H | -12.11373900 | 8.74735200  | -1.14884000 |
| C | -15.05424800 | 8.81751600  | -5.35043700 |
| H | -15.13964300 | 9.76803100  | -4.81921100 |
| C | -12.63190400 | 4.41913600  | -5.13393600 |
| H | -13.16051100 | 4.36504200  | -6.09428100 |
| C | -9.13906900  | 13.38860000 | -6.16199800 |
| C | -8.86811600  | 12.92421200 | -7.47006700 |
| C | -8.09603400  | 13.45725400 | -5.22218400 |
| C | -7.55488100  | 12.60502800 | -7.81170400 |
| C | -6.79806100  | 13.10361200 | -5.60997900 |
| C | -6.49617000  | 12.69221400 | -6.90440500 |
| H | -7.34602200  | 12.29372700 | -8.83405700 |
| H | -6.00456300  | 13.18689000 | -4.87175900 |
| C | -9.94809100  | 12.78276400 | -8.53523800 |
| H | -10.91909800 | 12.89263800 | -8.04609400 |
| C | -8.30472000  | 13.94224000 | -3.79471200 |
| H | -9.34980300  | 14.23871600 | -3.67963800 |
| C | -5.07803300  | 12.37697200 | -7.36562600 |
| H | -4.82967900  | 13.10017900 | -8.15588700 |
| H | -6.56758900  | 4.82249700  | -3.21037400 |
| C | -16.45033500 | 8.18057800  | -5.36879900 |
| H | -16.44147200 | 7.22621900  | -5.90723600 |
| H | -16.81061400 | 7.99031400  | -4.35279400 |
| H | -17.16526700 | 8.84156200  | -5.87065500 |
| C | -14.57165200 | 9.12176100  | -6.77371300 |
| H | -13.57235600 | 9.56454700  | -6.76529600 |
| H | -14.54742100 | 8.21138800  | -7.38400400 |
| H | -15.25778400 | 9.82454200  | -7.25920000 |
| C | -13.12832900 | 3.26736600  | -4.25296200 |
| H | -12.91937500 | 2.29896200  | -4.72144700 |
| H | -12.62766700 | 3.28703400  | -3.27755100 |
| H | -14.20491200 | 3.34161200  | -4.07454300 |

|   |              |             |              |
|---|--------------|-------------|--------------|
| C | -11.13170400 | 4.28056600  | -5.40557500  |
| H | -10.76171400 | 5.11050300  | -6.01672000  |
| H | -10.57582800 | 4.30035400  | -4.45913600  |
| H | -10.90229500 | 3.33521300  | -5.91349400  |
| C | -10.38676000 | 7.59062800  | -1.55413000  |
| H | -9.89577600  | 7.84120700  | -0.60586600  |
| H | -10.08732500 | 6.57117900  | -1.83038500  |
| H | -10.04118500 | 8.27917400  | -2.32830100  |
| C | -12.41908400 | 6.81270400  | -0.27858100  |
| H | -11.93821600 | 7.07624000  | 0.66983900   |
| H | -13.50257700 | 6.90306000  | -0.15147800  |
| H | -12.19956800 | 5.75869800  | -0.48635300  |
| C | -9.93755200  | 11.39569000 | -9.18790200  |
| H | -9.00954400  | 11.21576800 | -9.74525300  |
| H | -10.07133200 | 10.62156000 | -8.43033600  |
| H | -10.76420100 | 11.31984200 | -9.90282900  |
| C | -9.79861000  | 13.86343800 | -9.61521000  |
| H | -10.60055300 | 13.77654600 | -10.35617500 |
| H | -9.82912000  | 14.87375600 | -9.19745700  |
| H | -8.84279700  | 13.75213700 | -10.14115000 |
| C | -4.98845400  | 10.97447800 | -7.98104100  |
| H | -5.31843100  | 10.21912900 | -7.26002200  |
| H | -5.61892600  | 10.86773900 | -8.86781000  |
| H | -3.95838700  | 10.74687300 | -8.27929300  |
| C | -4.02988000  | 12.52980100 | -6.26363300  |
| H | -3.03229700  | 12.31688400 | -6.66043300  |
| H | -4.01883200  | 13.54165500 | -5.84798000  |
| H | -4.21926400  | 11.83118500 | -5.43857000  |
| C | -8.03510100  | 12.81982800 | -2.78657800  |
| H | -8.67320600  | 11.95910000 | -3.00545500  |
| H | -6.98365100  | 12.50643400 | -2.81519700  |
| H | -8.25037300  | 13.16002100 | -1.76761300  |
| C | -7.44839300  | 15.17765300 | -3.49053500  |
| H | -7.65254900  | 15.98203900 | -4.20384800  |
| H | -7.66098800  | 15.54866500 | -2.48222000  |
| H | -6.37853600  | 14.94650200 | -3.54021900  |

**(S<sub>a</sub>,S)-Int2**

E = -4183.48475283 a.u.

0 1

|   |             |            |             |
|---|-------------|------------|-------------|
| C | -8.43412700 | 1.45681200 | -5.92171200 |
| C | -8.15804000 | 2.29073600 | -6.99690400 |
| C | -7.88311900 | 3.64101900 | -6.77022800 |
| C | -7.87003700 | 4.17662900 | -5.48379500 |

|   |              |             |             |
|---|--------------|-------------|-------------|
| C | -8.17349800  | 3.31636700  | -4.40978800 |
| C | -8.44436100  | 1.96601900  | -4.62240000 |
| H | -8.66065900  | 0.40771500  | -6.08313300 |
| H | -8.17932000  | 1.90589700  | -8.01126700 |
| H | -7.72028000  | 4.30797200  | -7.61159300 |
| H | -8.68385300  | 1.31383900  | -3.79046400 |
| C | -7.78312900  | 5.66913400  | -5.23272500 |
| H | -8.66142600  | 5.90030100  | -4.61895600 |
| C | -7.92607400  | 6.55078000  | -6.45009800 |
| C | -9.10168000  | 7.29929700  | -6.55649800 |
| C | -6.86031400  | 6.79992600  | -7.32451200 |
| C | -9.19132700  | 8.31336900  | -7.52215700 |
| C | -6.96008600  | 7.79701000  | -8.28739900 |
| H | -5.93749200  | 6.24070300  | -7.20536700 |
| C | -8.12967600  | 8.56297400  | -8.37298300 |
| H | -10.08597800 | 8.93086100  | -7.54020600 |
| H | -8.18070100  | 9.36167100  | -9.10684300 |
| O | -5.96263200  | 8.10509000  | -9.17266800 |
| C | -4.70080000  | 7.54863900  | -8.92159100 |
| H | -4.70594400  | 6.45460000  | -9.03512800 |
| H | -4.01844900  | 7.98272000  | -9.65345000 |
| H | -4.35424700  | 7.79749300  | -7.90584100 |
| O | -8.23281000  | 3.90202200  | -3.17753000 |
| C | -8.92065500  | 3.21156100  | -2.15102100 |
| H | -8.34528700  | 2.34762800  | -1.79464000 |
| H | -9.04704700  | 3.92656200  | -1.33632600 |
| H | -9.90504500  | 2.87863200  | -2.50048400 |
| O | -10.10813400 | 7.05459300  | -5.68269200 |
| C | -5.13539300  | 7.97236000  | -4.65038900 |
| C | -6.46095700  | 7.66590500  | -4.37204700 |
| C | -7.40652600  | 8.68219000  | -4.38740000 |
| C | -6.97668500  | 9.97954000  | -4.65807100 |
| C | -5.62571600  | 10.26466000 | -4.88083300 |
| C | -4.66565100  | 9.25544000  | -4.89181500 |
| C | -5.17695100  | 5.70820600  | -4.50076600 |
| C | -6.60322800  | 6.16758700  | -4.30385500 |
| H | -8.46707300  | 8.50367000  | -4.25723500 |
| H | -7.71682200  | 10.77349900 | -4.71897500 |
| H | -5.33162800  | 11.28742500 | -5.08557900 |
| H | -3.62278200  | 9.46744500  | -5.10660000 |
| N | -4.40461300  | 6.75050200  | -4.68526100 |
| C | -2.95204000  | 6.75212100  | -4.79527500 |
| H | -2.67264700  | 7.16649200  | -5.76715100 |
| H | -2.54739100  | 7.38499800  | -4.00195600 |

|   |              |             |             |
|---|--------------|-------------|-------------|
| H | -2.57674900  | 5.73570200  | -4.69345900 |
| C | -4.58504900  | 4.37186600  | -4.21455000 |
| C | -4.14915600  | 3.44762700  | -5.35517900 |
| C | -4.94679800  | 2.13123200  | -5.40296600 |
| C | -4.21191200  | 4.11130700  | -6.73942300 |
| H | -3.09388700  | 3.19072700  | -5.16509600 |
| C | -4.40508400  | 1.19055400  | -6.48093900 |
| H | -5.98796700  | 2.36913800  | -5.62378500 |
| H | -4.94124400  | 1.63553900  | -4.42781500 |
| C | -3.65767100  | 3.18538700  | -7.82466100 |
| H | -5.26229600  | 4.33586200  | -6.96796900 |
| H | -3.66736300  | 5.06536500  | -6.75250100 |
| C | -4.42200800  | 1.86116200  | -7.85534300 |
| H | -5.00510200  | 0.27429700  | -6.49850100 |
| H | -3.37585500  | 0.89454500  | -6.23086200 |
| H | -3.71299000  | 3.68276300  | -8.79903400 |
| H | -2.59425500  | 2.99118300  | -7.62556100 |
| H | -3.99966400  | 1.19502800  | -8.61480000 |
| H | -5.46419900  | 2.05814500  | -8.14008300 |
| C | -4.33675500  | 4.12132900  | -2.91357600 |
| C | -3.74541600  | 2.82858100  | -2.40733300 |
| C | -4.68093300  | 5.04704200  | -1.76655300 |
| C | -4.80518800  | 2.11568800  | -1.54568500 |
| H | -2.88052600  | 3.06426000  | -1.77158000 |
| H | -3.38860900  | 2.18238700  | -3.21044300 |
| C | -5.71924600  | 4.37490700  | -0.85122200 |
| H | -3.76205800  | 5.22497600  | -1.18975600 |
| H | -5.03907800  | 6.02854700  | -2.09098300 |
| C | -5.23412400  | 3.00363000  | -0.37404300 |
| H | -4.40999200  | 1.16217400  | -1.18074700 |
| H | -5.67602300  | 1.89118900  | -2.17786000 |
| H | -5.93615100  | 5.02496400  | 0.00239100  |
| H | -6.64672900  | 4.25980300  | -1.42343600 |
| H | -6.02041700  | 2.50963100  | 0.20692200  |
| H | -4.37883900  | 3.13808700  | 0.30222900  |
| P | -11.12598500 | 10.49553500 | -5.08867300 |
| O | -11.15957200 | 10.69317800 | -6.55834800 |
| O | -10.54991900 | 11.84082800 | -4.30400900 |
| O | -12.70026300 | 10.50269400 | -4.59632100 |
| O | -10.40445800 | 9.34632200  | -4.43571200 |
| H | -10.43058400 | 7.91609100  | -5.28867500 |
| C | -12.88472000 | 14.65709100 | -4.61608100 |
| C | -12.26798800 | 13.50217200 | -4.12110700 |
| C | -11.09467800 | 13.04116200 | -4.70981000 |

|   |              |             |             |
|---|--------------|-------------|-------------|
| C | -10.46370600 | 13.79632300 | -5.71209900 |
| C | -11.06075600 | 14.99116700 | -6.12378700 |
| C | -12.28496400 | 15.41353200 | -5.61095300 |
| C | -14.21639200 | 14.87857600 | -3.93552100 |
| C | -14.46511400 | 13.51787200 | -3.26195200 |
| H | -10.55148600 | 15.58900600 | -6.87345000 |
| H | -12.75716000 | 16.31754100 | -5.98503500 |
| H | -14.15373400 | 15.68533000 | -3.19367900 |
| H | -15.11224600 | 13.57346900 | -2.38104600 |
| H | -14.92241100 | 12.82764000 | -3.97965200 |
| C | -13.04267000 | 12.99197500 | -2.91883400 |
| C | -13.08610800 | 11.53865900 | -2.49463500 |
| C | -12.55258200 | 13.64830200 | -1.59689000 |
| C | -13.32591600 | 11.45183000 | -1.12156700 |
| C | -12.99030800 | 10.38469900 | -3.26089100 |
| C | -13.22942300 | 12.82126000 | -0.48639300 |
| H | -11.46452300 | 13.53071500 | -1.53631600 |
| H | -12.78360100 | 14.71714300 | -1.55060400 |
| C | -13.59713700 | 10.22451000 | -0.53280000 |
| C | -13.23456800 | 9.12541200  | -2.68714800 |
| H | -12.65392000 | 12.80951100 | 0.44444600  |
| C | -13.57838400 | 9.08214400  | -1.32997400 |
| H | -13.81450900 | 10.14999300 | 0.52905900  |
| H | -13.79916800 | 8.11354500  | -0.88898500 |
| H | -14.22372800 | 13.21833400 | -0.24462300 |
| H | -15.00407700 | 15.15321300 | -4.64365800 |
| C | -13.10258100 | 7.86300000  | -3.47385300 |
| C | -12.19315700 | 6.86396500  | -3.05251900 |
| C | -13.88608200 | 7.64462500  | -4.62455100 |
| C | -12.09164700 | 5.68487800  | -3.78734300 |
| C | -13.74119300 | 6.44470000  | -5.32585500 |
| C | -12.85248600 | 5.45334900  | -4.93066600 |
| H | -11.36712500 | 4.93261500  | -3.47429800 |
| H | -14.34756000 | 6.27788000  | -6.21421100 |
| C | -11.29638500 | 7.00605400  | -1.82741600 |
| H | -11.43023400 | 8.00421700  | -1.40688500 |
| C | -14.93796500 | 8.62776600  | -5.11853000 |
| H | -14.91321100 | 9.51662300  | -4.48486600 |
| C | -12.69627200 | 4.17642900  | -5.73191000 |
| H | -13.44305900 | 4.20115700  | -6.53621600 |
| C | -9.14452000  | 13.39623400 | -6.29094500 |
| C | -9.04932500  | 12.94434800 | -7.62562700 |
| C | -7.97801500  | 13.57439700 | -5.52592900 |
| C | -7.78779800  | 12.66704800 | -8.14670100 |

|   |              |             |              |
|---|--------------|-------------|--------------|
| C | -6.73287900  | 13.28412500 | -6.09854000  |
| C | -6.61415300  | 12.82669800 | -7.40767900  |
| H | -7.70815600  | 12.33887500 | -9.18169900  |
| H | -5.83804100  | 13.45963100 | -5.50514400  |
| C | -10.26398700 | 12.83162800 | -8.53574700  |
| H | -11.15520800 | 12.81783600 | -7.90410700  |
| C | -8.01439900  | 14.13834400 | -4.11068600  |
| H | -9.04309300  | 14.43649100 | -3.89055100  |
| C | -5.28193400  | 12.52610800 | -8.08032800  |
| H | -5.27348300  | 13.09062400 | -9.02356400  |
| H | -6.87329700  | 5.80597500  | -3.29941300  |
| C | -16.34099800 | 8.01905800  | -4.98914500  |
| H | -16.44638800 | 7.13017000  | -5.62107000  |
| H | -16.54887800 | 7.72361800  | -3.95575500  |
| H | -17.10133200 | 8.74343700  | -5.30087100  |
| C | -14.66623900 | 9.07573100  | -6.55953800  |
| H | -13.66675000 | 9.50707500  | -6.65863200  |
| H | -14.75622400 | 8.23421900  | -7.25631000  |
| H | -15.39957500 | 9.83206300  | -6.86061700  |
| C | -12.96323200 | 2.93169700  | -4.87881600  |
| H | -12.90368200 | 2.02401300  | -5.48917300  |
| H | -12.21546400 | 2.84331100  | -4.08121700  |
| H | -13.95088700 | 2.97274000  | -4.41005500  |
| C | -11.30514400 | 4.09973000  | -6.36791400  |
| H | -11.09631100 | 4.98392300  | -6.97613700  |
| H | -10.53932600 | 4.05652700  | -5.58528600  |
| H | -11.20510500 | 3.19991600  | -6.98610800  |
| C | -9.81543000  | 6.88724300  | -2.19728100  |
| H | -9.18611400  | 7.01997100  | -1.30777000  |
| H | -9.58343300  | 5.90988500  | -2.63623000  |
| H | -9.57161400  | 7.66528800  | -2.92136800  |
| C | -11.67003100 | 5.97809400  | -0.75255600  |
| H | -11.04136200 | 6.10021500  | 0.13712700   |
| H | -12.71721300 | 6.07340800  | -0.44823600  |
| H | -11.53290500 | 4.95667500  | -1.12853200  |
| C | -10.27554800 | 11.53568900 | -9.35037300  |
| H | -9.46873000  | 11.51173800 | -10.09340300 |
| H | -10.18954300 | 10.67856700 | -8.68305100  |
| H | -11.22190900 | 11.45074600 | -9.89450600  |
| C | -10.33018900 | 14.03613000 | -9.48620800  |
| H | -11.21596800 | 13.96767800 | -10.12700200 |
| H | -10.37371600 | 14.98622400 | -8.94682000  |
| H | -9.44562900  | 14.06129300 | -10.13401200 |
| C | -5.17881300  | 11.03770600 | -8.44118600  |

|   |             |             |             |
|---|-------------|-------------|-------------|
| H | -5.24401900 | 10.41337700 | -7.54242300 |
| H | -5.98713500 | 10.72468500 | -9.10565000 |
| H | -4.22772100 | 10.82530500 | -8.94484100 |
| C | -4.05949100 | 12.97299600 | -7.27971900 |
| H | -3.15039200 | 12.82618900 | -7.87134500 |
| H | -4.11938400 | 14.02990600 | -7.00277500 |
| H | -3.94586900 | 12.38863300 | -6.35840500 |
| C | -7.61006300 | 13.09179600 | -3.06661500 |
| H | -8.30873700 | 12.25034400 | -3.07062000 |
| H | -6.59989000 | 12.70930400 | -3.26254400 |
| H | -7.60982000 | 13.53403700 | -2.06390700 |
| C | -7.14488000 | 15.39615900 | -3.98921400 |
| H | -7.42490100 | 16.14115900 | -4.74015900 |
| H | -7.26379100 | 15.84442500 | -2.99712800 |
| H | -6.08187100 | 15.16626000 | -4.12235700 |

**(S)-7b**

E = -2374.989672 a.u.

0 1

|   |             |             |             |
|---|-------------|-------------|-------------|
| P | -0.56208200 | -0.50295500 | 0.95629100  |
| O | 0.11796000  | -0.22302700 | 2.22074800  |
| O | -0.54874600 | -2.01549600 | 0.39594000  |
| O | -2.13997200 | -0.14311700 | 1.06615700  |
| O | -0.03888000 | 0.18872200  | -0.37865700 |
| H | 0.13344200  | 1.13989200  | -0.27277200 |
| C | -2.95371100 | -4.04417900 | 2.28291100  |
| C | -2.41698200 | -3.21683400 | 1.29240800  |
| C | -1.05612400 | -2.95012400 | 1.29667500  |
| C | -0.19198800 | -3.56760800 | 2.20860200  |
| C | -0.75321500 | -4.43792600 | 3.15055700  |
| C | -2.12706700 | -4.66164400 | 3.21202000  |
| C | -4.46073700 | -4.08396700 | 2.16751900  |
| C | -4.75047500 | -2.87904000 | 1.25224500  |
| H | -0.08885800 | -4.91882600 | 3.86253500  |
| H | -2.54199000 | -5.30560400 | 3.98187900  |
| H | -4.79531600 | -5.02277400 | 1.70826100  |
| H | -5.68195500 | -2.97193100 | 0.68560500  |
| H | -4.80568500 | -1.96481100 | 1.85376000  |
| C | -3.50407200 | -2.78641800 | 0.32684400  |
| C | -3.45997900 | -1.47337800 | -0.43075400 |
| C | -3.65128600 | -3.78472300 | -0.85678000 |
| C | -4.13507400 | -1.59768000 | -1.64925900 |
| C | -2.90931600 | -0.24932100 | -0.08363400 |
| C | -4.52592200 | -3.03936100 | -1.88240600 |

|   |             |             |             |
|---|-------------|-------------|-------------|
| H | -2.65852200 | -3.96754400 | -1.28301800 |
| H | -4.06850800 | -4.74498900 | -0.53919000 |
| C | -4.33233300 | -0.49343800 | -2.46735100 |
| C | -3.09778200 | 0.88574000  | -0.88381500 |
| H | -4.34094400 | -3.36073600 | -2.91140000 |
| C | -3.83192700 | 0.74370400  | -2.06629400 |
| H | -4.86106500 | -0.58967200 | -3.41106300 |
| H | -3.98123200 | 1.62153300  | -2.68846500 |
| H | -5.59386900 | -3.19326500 | -1.68256800 |
| H | -4.95630000 | -4.00618900 | 3.13947400  |
| C | 1.27982400  | -3.33376500 | 2.17979100  |
| C | 1.91492900  | -2.71804600 | 3.27654700  |
| C | 2.03522800  | -3.78714800 | 1.07843100  |
| C | 1.18784300  | -2.18496000 | 4.39087900  |
| C | 3.34505500  | -2.58935400 | 3.28413500  |
| C | 3.46219500  | -3.62729100 | 1.08743300  |
| C | 1.44362700  | -4.42919500 | -0.05814300 |
| C | 1.83663300  | -1.61668700 | 5.44614800  |
| H | 0.10456200  | -2.20841500 | 4.36631700  |
| C | 3.98759400  | -1.99084300 | 4.41426700  |
| C | 4.08174700  | -3.04381100 | 2.19191700  |
| C | 4.22537100  | -4.08560400 | -0.03273100 |
| H | 0.36967400  | -4.58097400 | -0.07649400 |
| C | 2.20549700  | -4.85428700 | -1.10617600 |
| C | 3.26017900  | -1.52754400 | 5.46776200  |
| H | 1.26530500  | -1.20823500 | 6.27362400  |
| H | 5.07152800  | -1.91253200 | 4.40584500  |
| H | 5.16474900  | -2.93914900 | 2.19999200  |
| C | 3.62030700  | -4.67717600 | -1.09982100 |
| H | 5.30338400  | -3.94965000 | -0.00760300 |
| H | 1.73312600  | -5.33611100 | -1.95654600 |
| H | 3.75601100  | -1.07345500 | 6.32001400  |
| H | 4.20833900  | -5.02075700 | -1.94496100 |
| C | -2.53374400 | 2.21008200  | -0.49405500 |
| C | -1.54910100 | 2.82153200  | -1.30112800 |
| C | -3.01492900 | 2.86693000  | 0.65837300  |
| C | -0.98526300 | 2.18066000  | -2.45661900 |
| C | -1.05143900 | 4.12396800  | -0.94971500 |
| C | -2.49994000 | 4.16227100  | 1.00382000  |
| C | -4.02390200 | 2.30171100  | 1.50449800  |
| C | -0.02915300 | 2.79845500  | -3.20861400 |
| H | -1.31303900 | 1.17850700  | -2.70955600 |
| C | -0.05667900 | 4.74005800  | -1.77442200 |
| C | -1.53805600 | 4.76031800  | 0.19100300  |



|   |             |            |             |
|---|-------------|------------|-------------|
| C | -2.99036300 | 4.82250100 | 2.17480200  |
| H | -4.43891500 | 1.33237300 | 1.25137500  |
| C | -4.46769500 | 2.96387000 | 2.61042400  |
| C | 0.43767800  | 4.10367900 | -2.87225000 |
| H | 0.38904500  | 2.28889900 | -4.07078100 |
| H | 0.29812100  | 5.72855500 | -1.49555400 |
| H | -1.15616500 | 5.74422900 | 0.45456200  |
| C | -3.94189100 | 4.24320400 | 2.95751200  |
| H | -2.58257500 | 5.79896300 | 2.42149800  |
| H | -5.23145900 | 2.51507300 | 3.23744700  |
| H | 1.19476600  | 4.57795500 | -3.48827500 |
| H | -4.30715500 | 4.75029100 | 3.84474100  |

**(R<sub>a</sub>,R)-Int3**

E = -4090.496036 a.u.

0 1

|   |             |             |             |
|---|-------------|-------------|-------------|
| C | -3.16153400 | -0.80260100 | 1.68179400  |
| C | -2.93741700 | 0.49333800  | 2.27514700  |
| C | -3.06656900 | 0.68282000  | 3.61152700  |
| C | -3.45717100 | -0.41495300 | 4.46991800  |
| C | -3.70437600 | -1.65015700 | 3.97771500  |
| C | -3.51046700 | -1.94101200 | 2.56203900  |
| H | -2.71307400 | 1.34790500  | 1.64831000  |
| H | -3.58770100 | -0.24889500 | 5.53411400  |
| H | -4.05177000 | -2.44728700 | 4.62799800  |
| O | -2.86244300 | 1.94131100  | 4.09859200  |
| O | -3.57327300 | -3.09894600 | 2.11168800  |
| C | -3.03698400 | 2.15978500  | 5.48082900  |
| H | -4.06584000 | 1.94190300  | 5.79806500  |
| H | -2.82833600 | 3.21696800  | 5.64490100  |
| H | -2.34302600 | 1.55487500  | 6.07721700  |
| C | -2.58544500 | -0.25197500 | -0.72801700 |
| C | -3.09680600 | -0.41865900 | -2.03888100 |
| C | -1.50335100 | 0.62170100  | -0.54839700 |
| C | -2.56832600 | 0.31322000  | -3.10264300 |
| C | -0.96457100 | 1.34174900  | -1.60891900 |
| H | -1.05399700 | 0.69529800  | 0.43654800  |
| C | -1.50677300 | 1.18940400  | -2.88083800 |
| H | -2.96728300 | 0.20089900  | -4.10321900 |
| H | -0.12278300 | 2.00554800  | -1.44417700 |
| H | -1.10076500 | 1.74883800  | -3.71783300 |
| O | -4.10156500 | -1.31551400 | -2.16980500 |
| C | -4.67240700 | -1.49221600 | -3.44946100 |
| H | -5.11040600 | -0.55682200 | -3.81700900 |

|   |              |             |             |
|---|--------------|-------------|-------------|
| H | -5.45855600  | -2.23673400 | -3.32742800 |
| H | -3.93037500  | -1.85627900 | -4.16952100 |
| C | -3.11354900  | -1.08119700 | 0.34534700  |
| H | -3.49907600  | -2.05711100 | 0.05777000  |
| H | -3.38960100  | -4.11944300 | 3.13104700  |
| C | -6.31251700  | 0.62264700  | 1.02016300  |
| C | -6.19235700  | -0.25030200 | -0.03393300 |
| N | -6.47674400  | -0.10209900 | 2.19162100  |
| H | -6.05656100  | 0.03807700  | -1.06760400 |
| C | -6.65118100  | 0.42952300  | 3.52318000  |
| H | -6.12563300  | -0.20735000 | 4.24066800  |
| H | -7.71074700  | 0.46738200  | 3.80476700  |
| H | -6.23332000  | 1.43890000  | 3.55975000  |
| C | -6.31766600  | 2.10643700  | 0.96225800  |
| C | -7.42269900  | 2.79195500  | 1.32047800  |
| C | -7.57345700  | 4.29646300  | 1.26971300  |
| C | -8.71793200  | 2.11485700  | 1.71946800  |
| C | -8.70179900  | 4.70674200  | 0.30930900  |
| H | -7.83464600  | 4.65143200  | 2.27859100  |
| H | -6.64826900  | 4.79748800  | 0.99022100  |
| C | -9.84955600  | 2.51605300  | 0.75753300  |
| H | -8.99549600  | 2.42999000  | 2.73747400  |
| H | -8.61925700  | 1.02750300  | 1.72521700  |
| C | -10.01947200 | 4.03303600  | 0.69104800  |
| H | -8.81100800  | 5.79698700  | 0.30961900  |
| H | -8.42292400  | 4.40853800  | -0.71041300 |
| H | -10.78385400 | 2.03632900  | 1.06880800  |
| H | -9.60687300  | 2.13135900  | -0.24156800 |
| H | -10.80661100 | 4.29983400  | -0.02275800 |
| H | -10.34144300 | 4.40422700  | 1.67436000  |
| C | -5.04889200  | 2.70902200  | 0.36071100  |
| C | -4.24369400  | 3.61524100  | 1.30999900  |
| C | -5.28331900  | 3.39467000  | -0.99747300 |
| H | -4.39376500  | 1.85259400  | 0.14231000  |
| C | -2.91858100  | 4.02998500  | 0.66307000  |
| H | -4.81098700  | 4.52075600  | 1.55518500  |
| H | -4.06279200  | 3.09587500  | 2.25792200  |
| C | -3.95151900  | 3.80472000  | -1.62875700 |
| H | -5.91841700  | 4.28176300  | -0.87614600 |
| H | -5.82642900  | 2.70912300  | -1.65975100 |
| C | -3.14810000  | 4.70850300  | -0.69008700 |
| H | -2.35986200  | 4.68926600  | 1.33665600  |
| H | -2.29523300  | 3.13844800  | 0.50077600  |
| H | -4.12323000  | 4.30654200  | -2.58808700 |

|   |             |              |             |
|---|-------------|--------------|-------------|
| H | -3.36692800 | 2.89888600   | -1.83997100 |
| H | -2.18860500 | 4.97406700   | -1.14877800 |
| H | -3.69770600 | 5.64803900   | -0.53419300 |
| C | -6.33614300 | -1.57723400  | 0.48271800  |
| C | -6.52443900 | -1.44927100  | 1.87998900  |
| C | -6.32909600 | -2.86153000  | -0.08585600 |
| C | -6.71987000 | -2.55519200  | 2.71634900  |
| C | -6.53712300 | -3.95697700  | 0.73243200  |
| H | -6.16877300 | -2.98523800  | -1.15399800 |
| C | -6.72868500 | -3.80525000  | 2.11960500  |
| H | -6.84491100 | -2.45864200  | 3.79281200  |
| H | -6.54748800 | -4.95616700  | 0.30874800  |
| H | -6.86180200 | -4.67862600  | 2.74684800  |
| P | -4.24420900 | -5.32489700  | 4.77987400  |
| O | -3.09422700 | -4.73485300  | 3.92012100  |
| O | -4.33627100 | -6.91147200  | 4.43807400  |
| O | -3.51579400 | -5.31224900  | 6.23806000  |
| O | -5.58168000 | -4.71769200  | 4.75891300  |
| C | -1.34462100 | -8.73420700  | 5.51404800  |
| C | -2.61122900 | -8.14354300  | 5.54309300  |
| C | -3.13231900 | -7.59571100  | 4.37961900  |
| C | -2.44939600 | -7.69257200  | 3.15787000  |
| C | -1.21000100 | -8.34172300  | 3.15164300  |
| C | -0.64236800 | -8.84465300  | 4.32134400  |
| C | -0.92681000 | -9.13826200  | 6.90984900  |
| C | -1.91142200 | -8.34278200  | 7.78771600  |
| H | -0.67647000 | -8.42077100  | 2.20867100  |
| H | 0.34094600  | -9.30535500  | 4.29752500  |
| H | -1.04560000 | -10.21920400 | 7.05829400  |
| H | -2.08988200 | -8.79480600  | 8.76831500  |
| H | -1.52739600 | -7.32838000  | 7.94325100  |
| C | -3.20918800 | -8.25239300  | 6.93540900  |
| C | -4.18085600 | -7.22854900  | 7.49357900  |
| C | -4.04769600 | -9.55078700  | 7.11015000  |
| C | -5.05227400 | -7.82995200  | 8.40505300  |
| C | -4.29202300 | -5.86948700  | 7.23983400  |
| C | -4.84166900 | -9.32730200  | 8.41207500  |
| H | -4.74161000 | -9.63175200  | 6.26608700  |
| H | -3.42275600 | -10.44899500 | 7.12625700  |
| C | -5.97286400 | -7.06598500  | 9.11078100  |
| C | -5.21307200 | -5.07098600  | 7.93171900  |
| H | -5.78400800 | -9.88223700  | 8.43488900  |
| C | -6.03173600 | -5.69211700  | 8.88218800  |
| H | -6.65153100 | -7.53055300  | 9.82014500  |

|   |             |              |             |
|---|-------------|--------------|-------------|
| H | -6.74950100 | -5.08064400  | 9.42156100  |
| H | -4.26171100 | -9.63818900  | 9.29039600  |
| H | 0.11919100  | -8.89705600  | 7.12035400  |
| C | -3.02095200 | -7.12454000  | 1.90118400  |
| C | -2.38000700 | -6.04978800  | 1.24922400  |
| C | -4.19652900 | -7.68406500  | 1.35733100  |
| C | -1.20775100 | -5.41228800  | 1.77531700  |
| C | -2.93313500 | -5.52631900  | 0.03095400  |
| C | -4.73453900 | -7.15556100  | 0.13599100  |
| C | -4.88335800 | -8.78393100  | 1.96734200  |
| C | -0.63141200 | -4.35579500  | 1.13404000  |
| H | -0.80505600 | -5.76126200  | 2.71933400  |
| C | -2.29468300 | -4.41960100  | -0.61319300 |
| C | -4.09042700 | -6.09319700  | -0.49670700 |
| C | -5.93129800 | -7.72299900  | -0.40565000 |
| H | -4.48240600 | -9.21088700  | 2.88024700  |
| C | -6.02059500 | -9.29965900  | 1.41913200  |
| C | -1.17688200 | -3.85020900  | -0.08327100 |
| H | 0.24692500  | -3.88147100  | 1.56089800  |
| H | -2.74280700 | -4.02819400  | -1.52407300 |
| H | -4.51060900 | -5.68659300  | -1.41488600 |
| C | -6.56071000 | -8.75926400  | 0.21543900  |
| H | -6.32590100 | -7.30220000  | -1.32727000 |
| H | -6.52368800 | -10.13146400 | 1.90209200  |
| H | -0.70845700 | -3.00019300  | -0.57172300 |
| H | -7.46992300 | -9.18019200  | -0.20197400 |
| C | -5.33816600 | -3.60536900  | 7.67344800  |
| C | -6.53300200 | -3.08538500  | 7.13280300  |
| C | -4.28084100 | -2.73729000  | 8.01908000  |
| C | -7.60738700 | -3.92475600  | 6.68918800  |
| C | -6.68455400 | -1.66581600  | 6.97612100  |
| C | -4.44502700 | -1.31891600  | 7.85785700  |
| C | -3.03576200 | -3.20712800  | 8.55159000  |
| C | -8.74816100 | -3.39244700  | 6.16662500  |
| H | -7.47800700 | -4.99930200  | 6.73434700  |
| C | -7.90663700 | -1.14527700  | 6.44120300  |
| C | -5.64195200 | -0.81741400  | 7.34667700  |
| C | -3.37562900 | -0.44360700  | 8.23254700  |
| H | -2.89657700 | -4.27346500  | 8.69174200  |
| C | -2.03344000 | -2.34250100  | 8.87978100  |
| C | -8.90947200 | -1.97950900  | 6.05005400  |
| H | -9.53849900 | -4.04830000  | 5.81651800  |
| H | -8.00968900 | -0.06633500  | 6.35370400  |
| H | -5.76840000 | 0.25965600   | 7.24040600  |

|   |             |             |            |
|---|-------------|-------------|------------|
| C | -2.20210700 | -0.93551200 | 8.71970000 |
| H | -3.53172400 | 0.62829600  | 8.12883400 |
| H | -1.09749200 | -2.72480500 | 9.27417100 |
| H | -9.82930000 | -1.57674900 | 5.63747400 |
| H | -1.39757900 | -0.26274600 | 9.00008700 |

**(R<sub>a</sub>,R)-TS2**

E = -4090.486432 a.u.

0 1

|   |             |             |             |
|---|-------------|-------------|-------------|
| C | -3.14871100 | -0.76089300 | 1.58982500  |
| C | -2.78221200 | 0.47117200  | 2.18549700  |
| C | -2.54432000 | 0.57879800  | 3.53551100  |
| C | -2.65828600 | -0.57158500 | 4.35372600  |
| C | -3.01613300 | -1.78531200 | 3.81109800  |
| C | -3.29082400 | -1.91150100 | 2.42338300  |
| H | -2.70349600 | 1.37023500  | 1.58822500  |
| H | -2.48266700 | -0.51560900 | 5.42379300  |
| H | -3.10789300 | -2.66511400 | 4.43843900  |
| O | -2.21771500 | 1.82017600  | 4.00377600  |
| O | -3.66376100 | -3.04004000 | 1.87770300  |
| C | -1.91854800 | 1.93402600  | 5.37719100  |
| H | -2.77641900 | 1.65386600  | 5.99998500  |
| H | -1.67014700 | 2.98179100  | 5.54705700  |
| H | -1.06244200 | 1.30628700  | 5.65471700  |
| C | -2.87806900 | -0.17411900 | -0.90386800 |
| C | -3.34654400 | -0.41272800 | -2.22095900 |
| C | -1.73643400 | 0.62808100  | -0.75869900 |
| C | -2.74459200 | 0.20629200  | -3.31642100 |
| C | -1.12151600 | 1.23240400  | -1.84983400 |
| H | -1.29490300 | 0.73657900  | 0.22448800  |
| C | -1.63899800 | 1.03240100  | -3.12456500 |
| H | -3.11725900 | 0.03732800  | -4.31904700 |
| H | -0.23657000 | 1.84197300  | -1.70278100 |
| H | -1.17380900 | 1.50241300  | -3.98523200 |
| O | -4.38812700 | -1.27177100 | -2.33241400 |
| C | -4.84378900 | -1.60673200 | -3.62873600 |
| H | -5.23804500 | -0.72668000 | -4.14903500 |
| H | -5.64425500 | -2.33236100 | -3.48722300 |
| H | -4.04114900 | -2.05608500 | -4.22372000 |
| C | -3.48850500 | -0.91037800 | 0.21058200  |
| H | -3.80793000 | -1.91338900 | -0.05554600 |
| H | -3.73901100 | -3.78477200 | 2.59199400  |
| C | -5.91915600 | 0.47907000  | 1.23348600  |
| C | -5.72210700 | -0.35975600 | 0.10937600  |

|   |              |             |             |
|---|--------------|-------------|-------------|
| N | -6.13196300  | -0.29926500 | 2.31606300  |
| H | -5.74628100  | 0.01465600  | -0.90441400 |
| C | -6.16514300  | 0.10813400  | 3.70896900  |
| H | -5.41447600  | -0.46139000 | 4.26587300  |
| H | -7.15187000  | -0.09832500 | 4.13644400  |
| H | -5.94233000  | 1.17391500  | 3.77047500  |
| C | -6.00090600  | 1.95543900  | 1.22712700  |
| C | -7.10630900  | 2.57047000  | 1.70957000  |
| C | -7.31931200  | 4.06858000  | 1.69253700  |
| C | -8.33044100  | 1.84571100  | 2.23353800  |
| C | -8.56296500  | 4.45494900  | 0.87582300  |
| H | -7.47406000  | 4.39856800  | 2.73118700  |
| H | -6.45042100  | 4.60499800  | 1.31912200  |
| C | -9.57974700  | 2.22987400  | 1.41997000  |
| H | -8.49373600  | 2.13101900  | 3.28430800  |
| H | -8.21658300  | 0.76190600  | 2.20479800  |
| C | -9.80566000  | 3.73944000  | 1.40117400  |
| H | -8.69777300  | 5.54146900  | 0.90588800  |
| H | -8.39824700  | 4.17750300  | -0.17406600 |
| H | -10.45116800 | 1.71165200  | 1.83354400  |
| H | -9.44937200  | 1.86832700  | 0.39167700  |
| H | -10.67957300 | 3.98794000  | 0.78962600  |
| H | -10.01933400 | 4.08815200  | 2.42114400  |
| C | -4.86311100  | 2.64134200  | 0.47511700  |
| C | -4.00051700  | 3.60968700  | 1.30816100  |
| C | -5.30024000  | 3.29600300  | -0.84826900 |
| H | -4.18327900  | 1.83489200  | 0.17086800  |
| C | -2.77224700  | 4.04143900  | 0.50096200  |
| H | -4.57076800  | 4.50537400  | 1.57797600  |
| H | -3.70040000  | 3.13876400  | 2.25105400  |
| C | -4.07058300  | 3.72790600  | -1.65074700 |
| H | -5.93870400  | 4.16782800  | -0.65498300 |
| H | -5.90500000  | 2.58577700  | -1.42582400 |
| C | -3.17832500  | 4.66902700  | -0.83602600 |
| H | -2.16610800  | 4.74218200  | 1.08510200  |
| H | -2.13985300  | 3.16434900  | 0.30177600  |
| H | -4.37772900  | 4.21024600  | -2.58553400 |
| H | -3.49592400  | 2.83231600  | -1.92589200 |
| H | -2.28685100  | 4.93774700  | -1.41376100 |
| H | -3.72445200  | 5.60325200  | -0.64180200 |
| C | -6.12237300  | -1.69166200 | 0.52718500  |
| C | -6.30095000  | -1.63520300 | 1.91969100  |
| C | -6.25266200  | -2.91655100 | -0.13020500 |
| C | -6.57729100  | -2.75605800 | 2.69743200  |

|   |             |              |             |
|---|-------------|--------------|-------------|
| C | -6.56973700 | -4.03739900  | 0.62451900  |
| H | -6.10167000 | -2.98516900  | -1.20341600 |
| C | -6.71529700 | -3.96216700  | 2.01835600  |
| H | -6.66317200 | -2.72968500  | 3.78125000  |
| H | -6.68774900 | -5.00023600  | 0.13728600  |
| H | -6.91725000 | -4.85330700  | 2.60086300  |
| P | -4.60488500 | -5.33346700  | 4.64836000  |
| O | -3.62799400 | -4.68398100  | 3.70876200  |
| O | -4.49962600 | -6.96582500  | 4.44057400  |
| O | -3.84438800 | -5.15517100  | 6.11055300  |
| O | -6.04199100 | -4.99540600  | 4.74568500  |
| C | -1.34710300 | -8.39856100  | 5.61158600  |
| C | -2.66385000 | -7.93259600  | 5.59965500  |
| C | -3.22797900 | -7.48580600  | 4.41044100  |
| C | -2.50111700 | -7.53504000  | 3.20806300  |
| C | -1.20454300 | -8.06240700  | 3.24379600  |
| C | -0.61546800 | -8.48291700  | 4.43430500  |
| C | -0.91481300 | -8.70390700  | 7.02756400  |
| C | -1.97184000 | -7.95027600  | 7.85536500  |
| H | -0.64267200 | -8.10592300  | 2.31479000  |
| H | 0.40672400  | -8.85039400  | 4.43985400  |
| H | -0.95050400 | -9.78300300  | 7.22613900  |
| H | -2.12018400 | -8.36097200  | 8.85908000  |
| H | -1.67606500 | -6.89989900  | 7.95626600  |
| C | -3.26586800 | -8.01383200  | 6.99312700  |
| C | -4.31332200 | -7.03570600  | 7.49797600  |
| C | -4.00140900 | -9.35903200  | 7.24787200  |
| C | -5.12016200 | -7.64645800  | 8.46090100  |
| C | -4.53411400 | -5.70628900  | 7.16150100  |
| C | -4.80049600 | -9.12264500  | 8.54507400  |
| H | -4.69289200 | -9.53736700  | 6.41705500  |
| H | -3.31058100 | -10.20608800 | 7.30701700  |
| C | -6.08082400 | -6.91404300  | 9.14704900  |
| C | -5.49518800 | -4.94197700  | 7.83991900  |
| H | -5.70051100 | -9.74158900  | 8.60750200  |
| C | -6.24400200 | -5.56247400  | 8.84621800  |
| H | -6.70854400 | -7.38639200  | 9.89718200  |
| H | -6.99231400 | -4.97496600  | 9.37112700  |
| H | -4.19359300 | -9.34502700  | 9.43225100  |
| H | 0.10625000  | -8.37104000  | 7.23668500  |
| C | -3.05941500 | -7.01786900  | 1.92316500  |
| C | -2.44213800 | -5.92345600  | 1.27690500  |
| C | -4.18909200 | -7.63109300  | 1.34321700  |
| C | -1.33772600 | -5.20891000  | 1.84943800  |

|   |              |              |             |
|---|--------------|--------------|-------------|
| C | -2.95908500  | -5.45061000  | 0.02323900  |
| C | -4.70031800  | -7.14491300  | 0.09221600  |
| C | -4.85520300  | -8.74709900  | 1.94732900  |
| C | -0.77081000  | -4.14755500  | 1.20686000  |
| H | -0.98199600  | -5.50507800  | 2.82934200  |
| C | -2.33605800  | -4.33291600  | -0.61943500 |
| C | -4.07078900  | -6.07363300  | -0.53958900 |
| C | -5.85282500  | -7.76941500  | -0.48257400 |
| H | -4.47336900  | -9.13782500  | 2.88386500  |
| C | -5.95073700  | -9.31612900  | 1.36841600  |
| C | -1.26930600  | -3.70269000  | -0.05360800 |
| H | 0.05544700   | -3.61661200  | 1.66984200  |
| H | -2.75095400  | -3.99010800  | -1.56558200 |
| H | -4.46429000  | -5.70758100  | -1.48673300 |
| C | -6.46504900  | -8.81794200  | 0.13516500  |
| H | -6.22578700  | -7.38446100  | -1.42897500 |
| H | -6.44047700  | -10.15713300 | 1.84897900  |
| H | -0.80980700  | -2.84905600  | -0.54501500 |
| H | -7.34040700  | -9.28230900  | -0.30838300 |
| C | -5.73410200  | -3.50746300  | 7.50054000  |
| C | -6.98876400  | -3.10318500  | 6.99600100  |
| C | -4.72940900  | -2.54400300  | 7.73599300  |
| C | -8.00904700  | -4.04483600  | 6.63766200  |
| C | -7.26109500  | -1.70799500  | 6.78847800  |
| C | -5.01294100  | -1.15157000  | 7.52134000  |
| C | -3.41991200  | -2.89026800  | 8.20597400  |
| C | -9.21224600  | -3.62797000  | 6.15085500  |
| H | -7.78306100  | -5.10125400  | 6.71091700  |
| C | -8.54465300  | -1.31053500  | 6.29220800  |
| C | -6.27293000  | -0.76497700  | 7.06727600  |
| C | -4.00165600  | -0.17875700  | 7.80325200  |
| H | -3.18663100  | -3.93536400  | 8.37550600  |
| C | -2.47242500  | -1.93626200  | 8.43813100  |
| C | -9.49279300  | -2.23933800  | 5.98574100  |
| H | -9.96095800  | -4.35956000  | 5.86512100  |
| H | -8.74164900  | -0.24760000  | 6.16927300  |
| H | -6.48859300  | 0.29358300   | 6.92730500  |
| C | -2.76653900  | -0.55383700  | 8.24249200  |
| H | -4.25352300  | 0.87114600   | 7.66994800  |
| H | -1.48714000  | -2.22736500  | 8.78781500  |
| H | -10.46136400 | -1.92918900  | 5.60545800  |
| H | -2.00793700  | 0.19366000   | 8.45796500  |

**(R<sub>a</sub>,R)-Int4**



E = -4090.50352 a.u.

0 1

|   |             |             |             |
|---|-------------|-------------|-------------|
| C | -3.11296300 | -0.70627000 | 1.49842400  |
| C | -2.74873200 | 0.48804500  | 2.12362000  |
| C | -2.38442500 | 0.54313700  | 3.46617000  |
| C | -2.38480400 | -0.62988200 | 4.22302100  |
| C | -2.73155500 | -1.83295600 | 3.61778500  |
| C | -3.10324400 | -1.89232600 | 2.26322900  |
| H | -2.72198700 | 1.42105000  | 1.57628500  |
| H | -2.12822800 | -0.62849500 | 5.27750800  |
| H | -2.74747400 | -2.75143400 | 4.19518200  |
| O | -2.05472000 | 1.78568500  | 3.94074700  |
| O | -3.48421400 | -3.03116900 | 1.67394400  |
| C | -1.60595100 | 1.85244400  | 5.27417300  |
| H | -2.38082400 | 1.51968900  | 5.97538700  |
| H | -1.36371400 | 2.89863700  | 5.46427900  |
| H | -0.71049500 | 1.23593300  | 5.42489800  |
| C | -2.99679500 | 0.01134000  | -1.00465800 |
| C | -3.47973300 | -0.11293900 | -2.32777100 |
| C | -1.80510600 | 0.71366500  | -0.82888200 |
| C | -2.85106500 | 0.53229700  | -3.39137200 |
| C | -1.15652500 | 1.34976300  | -1.88931800 |
| H | -1.35364600 | 0.74494000  | 0.15502500  |
| C | -1.69166200 | 1.27394900  | -3.16576200 |
| H | -3.24139400 | 0.44525600  | -4.39802400 |
| H | -0.23380900 | 1.89080300  | -1.70803400 |
| H | -1.20567400 | 1.76959100  | -4.00006300 |
| O | -4.56562400 | -0.92392100 | -2.49228300 |
| C | -5.03322100 | -1.15368900 | -3.80437100 |
| H | -5.38599300 | -0.22627100 | -4.27054600 |
| H | -5.86636600 | -1.85013800 | -3.70919600 |
| H | -4.25162900 | -1.59980500 | -4.42966300 |
| C | -3.70216900 | -0.75877400 | 0.10172000  |
| H | -3.66310700 | -1.80835700 | -0.20646000 |
| H | -3.60212400 | -3.74650500 | 2.36509300  |
| C | -5.72325900 | 0.36725300  | 1.35096600  |
| C | -5.31286400 | -0.47659500 | 0.16682900  |
| N | -6.02133600 | -0.43098500 | 2.35004600  |
| H | -5.64873500 | -0.04667500 | -0.77516100 |
| C | -6.11548500 | -0.09977800 | 3.76555900  |
| H | -5.36814900 | -0.70547700 | 4.28847400  |
| H | -7.10979700 | -0.35045400 | 4.14469500  |
| H | -5.90012200 | 0.95989300  | 3.89885500  |
| C | -5.91036300 | 1.82124600  | 1.34958900  |

|   |              |             |             |
|---|--------------|-------------|-------------|
| C | -7.07514500  | 2.34401100  | 1.82132100  |
| C | -7.36787000  | 3.82851500  | 1.81970500  |
| C | -8.26974800  | 1.55098600  | 2.31298100  |
| C | -8.62441600  | 4.17831700  | 1.00752400  |
| H | -7.54477200  | 4.12014000  | 2.86637300  |
| H | -6.52063400  | 4.41222700  | 1.47139200  |
| C | -9.53377900  | 1.90317600  | 1.50473100  |
| H | -8.44650900  | 1.79506200  | 3.37163100  |
| H | -8.12045900  | 0.47398800  | 2.25169100  |
| C | -9.83298300  | 3.39883300  | 1.51811800  |
| H | -8.80224800  | 5.25716000  | 1.06272200  |
| H | -8.44795200  | 3.93267400  | -0.04805700 |
| H | -10.37677900 | 1.33193700  | 1.90622200  |
| H | -9.38714900  | 1.57106000  | 0.46876300  |
| H | -10.71692500 | 3.61595000  | 0.90965400  |
| H | -10.06380500 | 3.71682500  | 2.54405600  |
| C | -4.84942100  | 2.60118700  | 0.57640900  |
| C | -4.02675600  | 3.60766900  | 1.40569100  |
| C | -5.36430000  | 3.24026900  | -0.72684900 |
| H | -4.12469600  | 1.85501300  | 0.23413700  |
| C | -2.84964300  | 4.12153700  | 0.57075600  |
| H | -4.64154300  | 4.46437200  | 1.70397700  |
| H | -3.67177100  | 3.14104000  | 2.33121400  |
| C | -4.18347600  | 3.76227800  | -1.55006600 |
| H | -6.05569500  | 4.06521700  | -0.51260600 |
| H | -5.92930300  | 2.49485200  | -1.30143000 |
| C | -3.33353900  | 4.74626500  | -0.74116400 |
| H | -2.26917100  | 4.84672800  | 1.15067100  |
| H | -2.17504700  | 3.28490900  | 0.33916800  |
| H | -4.54663100  | 4.23789500  | -2.46790000 |
| H | -3.55942100  | 2.91134000  | -1.85523500 |
| H | -2.47823200  | 5.08131700  | -1.33787800 |
| H | -3.93272400  | 5.63986700  | -0.51379600 |
| C | -5.91308900  | -1.80645700 | 0.53870100  |
| C | -6.17972600  | -1.77903500 | 1.90414200  |
| C | -6.01628400  | -2.99809100 | -0.15416900 |
| C | -6.52421800  | -2.89245900 | 2.64799900  |
| C | -6.41681700  | -4.13326000 | 0.55519900  |
| H | -5.76662700  | -3.04956600 | -1.20998300 |
| C | -6.64269800  | -4.08639800 | 1.93147800  |
| H | -6.66556900  | -2.89282000 | 3.72525600  |
| H | -6.52371600  | -5.08086800 | 0.03769200  |
| H | -6.89025600  | -4.98561000 | 2.48370400  |
| P | -4.65122600  | -5.27848000 | 4.61770500  |

|   |             |              |             |
|---|-------------|--------------|-------------|
| O | -3.69306700 | -4.67094400  | 3.64291700  |
| O | -4.59076100 | -6.92348200  | 4.45635300  |
| O | -3.88099800 | -5.09240600  | 6.07994100  |
| O | -6.08555900 | -4.92102100  | 4.74197900  |
| C | -1.49161500 | -8.42811600  | 5.68147900  |
| C | -2.79125400 | -7.91817200  | 5.64932800  |
| C | -3.33724100 | -7.48322900  | 4.44650000  |
| C | -2.60685800 | -7.59373300  | 3.25118800  |
| C | -1.32844800 | -8.16347000  | 3.30779800  |
| C | -0.75766300 | -8.56988800  | 4.51118600  |
| C | -1.07664400 | -8.71206500  | 7.10697100  |
| C | -2.11345100 | -7.90535900  | 7.90951800  |
| H | -0.76564200 | -8.25167600  | 2.38257700  |
| H | 0.25140200  | -8.97154500  | 4.53172200  |
| H | -1.14730000 | -9.78429200  | 7.33176300  |
| H | -2.28165000 | -8.28726000  | 8.92147800  |
| H | -1.78426500 | -6.86301800  | 7.98809600  |
| C | -3.40291200 | -7.94691900  | 7.03924300  |
| C | -4.41877000 | -6.92252300  | 7.51267800  |
| C | -4.18413500 | -9.26056100  | 7.32010600  |
| C | -5.24965200 | -7.48277900  | 8.48602100  |
| C | -4.58940500 | -5.59441100  | 7.14173600  |
| C | -4.98196100 | -8.96676500  | 8.60605100  |
| H | -4.87631500 | -9.43486000  | 6.48899000  |
| H | -3.52241000 | -10.12859100 | 7.40343200  |
| C | -6.18581600 | -6.70262900  | 9.15235100  |
| C | -5.52092000 | -4.78239200  | 7.80630300  |
| H | -5.90349100 | -9.55232500  | 8.67712900  |
| C | -6.29595700 | -5.35291500  | 8.82255200  |
| H | -6.83245400 | -7.13528100  | 9.91031600  |
| H | -7.02066100 | -4.72540000  | 9.33416500  |
| H | -4.38831900 | -9.18936600  | 9.50212300  |
| H | -0.04659300 | -8.40652300  | 7.31393300  |
| C | -3.13348700 | -7.10650100  | 1.94243800  |
| C | -2.45480900 | -6.07443200  | 1.25715600  |
| C | -4.27217300 | -7.70512100  | 1.36519100  |
| C | -1.34038000 | -5.37269800  | 1.82576900  |
| C | -2.90571000 | -5.66418600  | -0.04295600 |
| C | -4.72152600 | -7.27716300  | 0.06966800  |
| C | -5.00435700 | -8.75354900  | 2.01250300  |
| C | -0.69981300 | -4.38620200  | 1.13572000  |
| H | -1.03717900 | -5.61617500  | 2.83732800  |
| C | -2.20384600 | -4.62607100  | -0.73535600 |
| C | -4.02252400 | -6.27827700  | -0.60674800 |

|   |              |              |             |
|---|--------------|--------------|-------------|
| C | -5.88268800  | -7.88702000  | -0.50403600 |
| H | -4.66904300  | -9.10136000  | 2.98298500  |
| C | -6.10698300  | -9.30936400  | 1.43393500  |
| C | -1.12795400  | -4.01092000  | -0.17179500 |
| H | 0.13032700   | -3.85884500  | 1.59555600  |
| H | -2.56072800  | -4.33602600  | -1.72129200 |
| H | -4.36186200  | -5.96536300  | -1.59329400 |
| C | -6.56062800  | -8.86706000  | 0.15635100  |
| H | -6.20758200  | -7.54832900  | -1.48533100 |
| H | -6.64821600  | -10.09711500 | 1.94833200  |
| H | -0.60858100  | -3.21708100  | -0.70094700 |
| H | -7.44155900  | -9.32068400  | -0.28747100 |
| C | -5.70201000  | -3.34234000  | 7.45901600  |
| C | -6.94837700  | -2.88671800  | 6.97811900  |
| C | -4.65876000  | -2.41865500  | 7.68717100  |
| C | -8.00230400  | -3.78886100  | 6.61356300  |
| C | -7.17895400  | -1.47923900  | 6.80814800  |
| C | -4.89488400  | -1.01435600  | 7.49380100  |
| C | -3.35667100  | -2.81915400  | 8.13324000  |
| C | -9.20003400  | -3.32380700  | 6.15648700  |
| H | -7.80421200  | -4.85260500  | 6.65504400  |
| C | -8.45962400  | -1.03106200  | 6.34788800  |
| C | -6.15262600  | -0.57562600  | 7.08085600  |
| C | -3.83986000  | -0.08392600  | 7.75660100  |
| H | -3.16115800  | -3.87337700  | 8.29156500  |
| C | -2.36959700  | -1.90391900  | 8.35489200  |
| C | -9.44083600  | -1.92309600  | 6.03361400  |
| H | -9.97527700  | -4.02483900  | 5.86502100  |
| H | -8.62660600  | 0.04061000   | 6.25681100  |
| H | -6.33464400  | 0.49243300   | 6.96724600  |
| C | -2.61267100  | -0.51064400  | 8.16912900  |
| H | -4.04925900  | 0.97571500   | 7.62808800  |
| H | -1.39036400  | -2.23482400  | 8.68561000  |
| H | -10.40726400 | -1.57382300  | 5.68223400  |
| H | -1.81975500  | 0.20495500   | 8.36855600  |

**(S<sub>a</sub>,S)-Int3**

E = -4090.495131 a.u.

0 1

|   |             |            |            |
|---|-------------|------------|------------|
| C | 2.23531000  | 2.39190400 | 1.13283300 |
| C | 2.51611800  | 2.91123300 | 2.45132600 |
| C | 1.51373500  | 3.12731000 | 3.33877500 |
| C | 0.15025300  | 2.79012300 | 2.98709700 |
| C | -0.17544200 | 2.28738400 | 1.77368800 |

|   |             |             |             |
|---|-------------|-------------|-------------|
| C | 0.83839500  | 2.05703200  | 0.75879200  |
| H | 3.53090600  | 3.18586500  | 2.71816600  |
| H | -0.64787700 | 2.96209100  | 3.70177900  |
| H | -1.20606700 | 2.05720600  | 1.53466200  |
| O | 1.83405700  | 3.67066100  | 4.54584700  |
| O | 0.57802500  | 1.56970900  | -0.35561700 |
| C | 0.78424500  | 4.04163700  | 5.41266100  |
| H | 0.23193300  | 3.16778100  | 5.77861800  |
| H | 1.25776500  | 4.54191000  | 6.25752200  |
| H | 0.08341600  | 4.73230400  | 4.92652500  |
| C | 4.62748200  | 2.15455600  | 0.35132400  |
| C | 5.45213100  | 2.67187000  | -0.66241600 |
| C | 5.23175200  | 1.50868100  | 1.44218900  |
| C | 6.83517500  | 2.55709500  | -0.59250200 |
| C | 6.61428300  | 1.37113900  | 1.50152400  |
| H | 4.60468500  | 1.07119900  | 2.21429900  |
| C | 7.41491200  | 1.89280400  | 0.48668400  |
| H | 7.43672300  | 2.97894300  | -1.39158900 |
| H | 7.06108000  | 0.84121600  | 2.33615500  |
| H | 8.49406800  | 1.78500200  | 0.53325300  |
| O | 4.87810700  | 3.29110300  | -1.74642900 |
| C | 4.47093800  | 4.62541900  | -1.48409200 |
| H | 5.33632500  | 5.25174100  | -1.23607900 |
| H | 3.99949800  | 4.99489200  | -2.39643500 |
| H | 3.75096000  | 4.65999400  | -0.65707300 |
| C | 3.17920600  | 2.17775400  | 0.17353900  |
| H | 2.80837700  | 1.97512000  | -0.83043400 |
| P | -2.22024500 | -0.19357000 | 0.24252400  |
| O | -1.33809100 | -0.52451200 | 1.36723500  |
| O | -3.15775500 | -1.38134900 | -0.33466900 |
| O | -3.28037500 | 0.96161400  | 0.71757000  |
| O | -1.59623800 | 0.33313100  | -1.09660000 |
| H | -0.75990900 | 0.86406300  | -0.88941400 |
| C | -5.95785700 | -1.91845400 | 1.97474600  |
| C | -5.20117800 | -1.42300400 | 0.90921300  |
| C | -3.96259100 | -1.98332000 | 0.63071800  |
| C | -3.51443900 | -3.12047400 | 1.31571000  |
| C | -4.31216300 | -3.61759100 | 2.35231600  |
| C | -5.51392000 | -3.00923800 | 2.70930500  |
| C | -7.21226900 | -1.09332000 | 2.15228500  |
| C | -6.90047400 | 0.16256900  | 1.31743600  |
| H | -3.96351500 | -4.49604400 | 2.88739400  |
| H | -6.09609800 | -3.39255900 | 3.54223600  |
| H | -8.08816800 | -1.62528500 | 1.75958500  |

|   |             |             |             |
|---|-------------|-------------|-------------|
| H | -7.79183100 | 0.66844600  | 0.93381100  |
| H | -6.33673400 | 0.87826600  | 1.92665400  |
| C | -5.97423300 | -0.34543400 | 0.17564800  |
| C | -5.30570000 | 0.80862300  | -0.54282000 |
| C | -6.82810900 | -0.93827200 | -0.98064500 |
| C | -6.09966700 | 1.23801200  | -1.60980600 |
| C | -4.12975600 | 1.48136700  | -0.24717700 |
| C | -7.25716300 | 0.28612400  | -1.81227400 |
| H | -6.18688200 | -1.58892200 | -1.58587800 |
| H | -7.66842000 | -1.53425900 | -0.61157000 |
| C | -5.76658900 | 2.38241800  | -2.32157500 |
| C | -3.79490500 | 2.66849800  | -0.91465100 |
| H | -7.42109200 | 0.04558600  | -2.86669900 |
| C | -4.63439200 | 3.10335200  | -1.94623500 |
| H | -6.37922700 | 2.71888600  | -3.15277900 |
| H | -4.37238900 | 4.01917800  | -2.46841200 |
| H | -8.19045000 | 0.71987600  | -1.43131900 |
| H | -7.41868400 | -0.86417200 | 3.20182300  |
| C | -2.29085500 | -3.87005300 | 0.90390800  |
| C | -1.10941700 | -3.81517800 | 1.66628900  |
| C | -2.36971800 | -4.69412800 | -0.23980600 |
| C | -0.97295100 | -2.97613200 | 2.82035600  |
| C | 0.02274300  | -4.60756700 | 1.27130500  |
| C | -1.23892000 | -5.49825200 | -0.60902100 |
| C | -3.53735900 | -4.76491900 | -1.06752700 |
| C | 0.21084500  | -2.89592600 | 3.48962700  |
| H | -1.81494800 | -2.36284600 | 3.11854600  |
| C | 1.24898300  | -4.48938700 | 2.00177100  |
| C | -0.07890600 | -5.44580000 | 0.16378900  |
| C | -1.31291800 | -6.31531900 | -1.78056000 |
| H | -4.40787700 | -4.17542500 | -0.79920600 |
| C | -3.56864200 | -5.55491800 | -2.17972600 |
| C | 1.34787500  | -3.64909700 | 3.06807200  |
| H | 0.30904100  | -2.22668700 | 4.33861000  |
| H | 2.10477600  | -5.06994600 | 1.66526400  |
| H | 0.78071400  | -6.04647100 | -0.12757900 |
| C | -2.43904800 | -6.34235000 | -2.54807800 |
| H | -0.44261800 | -6.91080300 | -2.04507300 |
| H | -4.46310700 | -5.58714100 | -2.79400400 |
| H | 2.29199600  | -3.52820000 | 3.59215200  |
| H | -2.48328900 | -6.96178300 | -3.43834900 |
| C | -2.61839000 | 3.49754800  | -0.51854600 |
| C | -1.50122600 | 3.60913100  | -1.36765400 |
| C | -2.65599600 | 4.20915600  | 0.70251700  |

|   |             |             |             |
|---|-------------|-------------|-------------|
| C | -1.38187500 | 2.86186800  | -2.58697400 |
| C | -0.40185700 | 4.45401200  | -0.98735700 |
| C | -1.56215500 | 5.06776400  | 1.05763500  |
| C | -3.73981600 | 4.09128000  | 1.63174000  |
| C | -0.24067200 | 2.91071000  | -3.33081200 |
| H | -2.19965300 | 2.21362500  | -2.88129600 |
| C | 0.76672800  | 4.49590000  | -1.81259000 |
| C | -0.46506400 | 5.17430300  | 0.20218200  |
| C | -1.58547800 | 5.75211700  | 2.31216000  |
| H | -4.58347200 | 3.45919100  | 1.37572200  |
| C | -3.72226300 | 4.75164800  | 2.82649800  |
| C | 0.85683100  | 3.73552700  | -2.93796500 |
| H | -0.15875400 | 2.31155900  | -4.23221300 |
| H | 1.58438700  | 5.14163800  | -1.50433700 |
| H | 0.37592100  | 5.80198400  | 0.49100000  |
| C | -2.62811400 | 5.59512200  | 3.17778100  |
| H | -0.74402000 | 6.39409500  | 2.56157700  |
| H | -4.55181000 | 4.63948000  | 3.51741300  |
| H | 1.75940500  | 3.74926100  | -3.54233900 |
| H | -2.63594800 | 6.11664000  | 4.13021400  |
| C | 3.53144900  | -1.60390100 | -0.53354800 |
| C | 2.62708400  | -0.86974600 | 0.19176200  |
| N | 4.47484400  | -2.14822300 | 0.33231000  |
| H | 1.77813500  | -0.34543800 | -0.22442700 |
| C | 5.43052400  | -3.18594600 | 0.02234200  |
| H | 5.25830000  | -3.52509400 | -1.00069900 |
| H | 6.46094000  | -2.82553100 | 0.11377900  |
| H | 5.29023000  | -4.03378000 | 0.70168700  |
| C | 3.49022900  | -1.84635800 | -1.99746700 |
| C | 2.45354400  | -2.55891600 | -2.48393900 |
| C | 2.06803200  | -2.63797500 | -3.94307700 |
| C | 1.42249700  | -3.22724700 | -1.60966800 |
| C | 0.69708500  | -1.95117000 | -4.14007100 |
| H | 1.97278500  | -3.69351500 | -4.23528700 |
| H | 2.80917800  | -2.18187600 | -4.60489600 |
| C | 0.08685700  | -2.48372900 | -1.75176400 |
| H | 1.27903700  | -4.26091500 | -1.96034700 |
| H | 1.73294000  | -3.26852700 | -0.56428500 |
| C | -0.37902700 | -2.51651200 | -3.20636200 |
| H | 0.38966600  | -2.04466500 | -5.18808200 |
| H | 0.81153800  | -0.87886400 | -3.93096600 |
| H | -0.67027300 | -2.91657300 | -1.09147300 |
| H | 0.22687400  | -1.44346600 | -1.43531300 |
| H | -1.30838600 | -1.94675100 | -3.31534500 |

|   |             |             |             |
|---|-------------|-------------|-------------|
| H | -0.60268900 | -3.55669000 | -3.48552400 |
| C | 4.47100500  | -1.10751100 | -2.90235200 |
| C | 3.87778800  | 0.22797000  | -3.38758800 |
| C | 5.84965800  | -0.83001800 | -2.28593400 |
| H | 4.64309800  | -1.73274600 | -3.79050400 |
| C | 4.77402200  | 0.88122300  | -4.44117300 |
| H | 3.77644600  | 0.89715700  | -2.52075400 |
| H | 2.86973500  | 0.06770800  | -3.78601200 |
| C | 6.78123300  | -0.17345800 | -3.31137600 |
| H | 5.73255100  | -0.17652500 | -1.40820300 |
| H | 6.31067400  | -1.75865800 | -1.93517200 |
| C | 6.18856600  | 1.10625800  | -3.90454200 |
| H | 4.34203000  | 1.83458700  | -4.76678100 |
| H | 4.81338500  | 0.22910900  | -5.32608600 |
| H | 7.75040600  | 0.04292700  | -2.84599400 |
| H | 6.97328800  | -0.89200500 | -4.12115100 |
| H | 6.84058100  | 1.48917000  | -4.69862100 |
| H | 6.14040600  | 1.87832200  | -3.13044900 |
| C | 2.99885400  | -0.96122900 | 1.56845400  |
| C | 4.17135000  | -1.75490400 | 1.61676000  |
| C | 2.46618400  | -0.45224500 | 2.76172500  |
| C | 4.83620500  | -2.02773600 | 2.81605400  |
| C | 3.13182400  | -0.70454200 | 3.95273000  |
| H | 1.53496800  | 0.10922500  | 2.74802700  |
| C | 4.30797100  | -1.48064800 | 3.97847200  |
| H | 5.73918500  | -2.63117200 | 2.83923400  |
| H | 2.73864600  | -0.30488700 | 4.88285800  |
| H | 4.80587700  | -1.66204400 | 4.92616900  |

**(S<sub>a</sub>,S)-TS2**

E = -4090.482802 a.u.

0 1

|   |             |            |             |
|---|-------------|------------|-------------|
| C | 2.20578100  | 2.07818500 | 1.02783900  |
| C | 2.47406600  | 2.64996800 | 2.30112200  |
| C | 1.44331300  | 3.03824400 | 3.12508500  |
| C | 0.10796200  | 2.81535200 | 2.71235200  |
| C | -0.18168800 | 2.25657700 | 1.48702300  |
| C | 0.84834200  | 1.90814400 | 0.59466500  |
| H | 3.49511200  | 2.82772500 | 2.61962400  |
| H | -0.72439400 | 3.10470100 | 3.34571900  |
| H | -1.21442800 | 2.11785200 | 1.19789700  |
| O | 1.78040300  | 3.62564700 | 4.30806600  |
| O | 0.64176700  | 1.40308300 | -0.59812000 |
| C | 0.72578900  | 4.06495200 | 5.13582400  |



|   |             |             |             |
|---|-------------|-------------|-------------|
| H | 0.11032700  | 3.22550600  | 5.48238300  |
| H | 1.19647100  | 4.54416000  | 5.99437700  |
| H | 0.08261500  | 4.78788800  | 4.61810100  |
| C | 4.65353200  | 1.75271600  | 0.40644000  |
| C | 5.45043300  | 2.38452000  | -0.56751300 |
| C | 5.28084900  | 1.26321000  | 1.56276200  |
| C | 6.82970100  | 2.47506600  | -0.41823100 |
| C | 6.66223600  | 1.33730100  | 1.70394700  |
| H | 4.68117100  | 0.80146300  | 2.34035200  |
| C | 7.43798500  | 1.93140900  | 0.71013900  |
| H | 7.40438600  | 2.97145500  | -1.19377900 |
| H | 7.13003200  | 0.92931800  | 2.59375500  |
| H | 8.51616600  | 1.98932500  | 0.82078700  |
| O | 4.86681400  | 2.92260000  | -1.68578400 |
| C | 4.23643800  | 4.17912100  | -1.46293900 |
| H | 4.96829800  | 4.91693300  | -1.11428400 |
| H | 3.82378300  | 4.49008800  | -2.42341400 |
| H | 3.42603200  | 4.09104200  | -0.72949600 |
| C | 3.21498200  | 1.63146800  | 0.14753900  |
| H | 2.92501800  | 1.56589800  | -0.89765000 |
| P | -2.21644200 | -0.15414400 | 0.23388800  |
| O | -1.39743000 | -0.58457800 | 1.38709300  |
| O | -3.20707200 | -1.34393500 | -0.33121500 |
| O | -3.31955400 | 0.96089400  | 0.79787900  |
| O | -1.59820100 | 0.44980400  | -1.00974200 |
| H | -0.35173500 | 1.06336200  | -0.77342500 |
| C | -5.90727000 | -1.95988200 | 2.06964300  |
| C | -5.19707900 | -1.43386900 | 0.98756900  |
| C | -3.96149200 | -1.96716600 | 0.64319300  |
| C | -3.48296900 | -3.11551300 | 1.29042600  |
| C | -4.23352500 | -3.64798200 | 2.34461200  |
| C | -5.42719300 | -3.06300500 | 2.76184000  |
| C | -7.15900900 | -1.14792100 | 2.31694300  |
| C | -6.88874400 | 0.12917600  | 1.49948800  |
| H | -3.85387000 | -4.53301500 | 2.84742700  |
| H | -5.97297200 | -3.47145400 | 3.60748600  |
| H | -8.04749300 | -1.67624600 | 1.94768300  |
| H | -7.79826200 | 0.63793400  | 1.16457400  |
| H | -6.30378000 | 0.83378100  | 2.10148600  |
| C | -6.00619300 | -0.34648300 | 0.31108300  |
| C | -5.36918700 | 0.82204100  | -0.41194700 |
| C | -6.90175500 | -0.92389400 | -0.82130100 |
| C | -6.19762800 | 1.25826500  | -1.44864000 |
| C | -4.17913300 | 1.48573100  | -0.14134600 |

|   |             |             |             |
|---|-------------|-------------|-------------|
| C | -7.36386000 | 0.31073200  | -1.61807800 |
| H | -6.28018600 | -1.56164400 | -1.45999700 |
| H | -7.72591800 | -1.52966100 | -0.43156800 |
| C | -5.88530300 | 2.40297400  | -2.16888900 |
| C | -3.86610100 | 2.67144000  | -0.82595300 |
| H | -7.57163100 | 0.08506000  | -2.66829100 |
| C | -4.73557100 | 3.11274800  | -1.83015200 |
| H | -6.52367800 | 2.74517100  | -2.97824000 |
| H | -4.48295900 | 4.02638900  | -2.36117100 |
| H | -8.28054000 | 0.73913900  | -1.19255900 |
| H | -7.32420300 | -0.94486700 | 3.37931600  |
| C | -2.25875200 | -3.83472300 | 0.83348900  |
| C | -1.09249300 | -3.84832700 | 1.62162000  |
| C | -2.31502700 | -4.57449700 | -0.36828600 |
| C | -0.96678900 | -3.06759800 | 2.81758000  |
| C | 0.02951900  | -4.64834400 | 1.21489600  |
| C | -1.19064600 | -5.37824200 | -0.75844500 |
| C | -3.45680600 | -4.56060100 | -1.23367500 |
| C | 0.19027700  | -3.07390900 | 3.53685700  |
| H | -1.79221200 | -2.42810300 | 3.10525000  |
| C | 1.22849500  | -4.62121600 | 1.99837400  |
| C | -0.05697600 | -5.41264200 | 0.05368200  |
| C | -1.24772600 | -6.11649400 | -1.98261700 |
| H | -4.31976100 | -3.96721400 | -0.95151900 |
| C | -3.47104500 | -5.27252300 | -2.39758900 |
| C | 1.31083300  | -3.85410900 | 3.12020200  |
| H | 0.27825700  | -2.45545300 | 4.42479400  |
| H | 2.07348700  | -5.21909300 | 1.66439000  |
| H | 0.79176200  | -6.02607700 | -0.24408900 |
| C | -2.34980900 | -6.06386100 | -2.78294900 |
| H | -0.38475900 | -6.71740600 | -2.25938800 |
| H | -4.34535700 | -5.23942100 | -3.04005600 |
| H | 2.23141900  | -3.81632200 | 3.69577300  |
| H | -2.38141300 | -6.62340500 | -3.71271800 |
| C | -2.67831100 | 3.50902700  | -0.48578500 |
| C | -1.60041200 | 3.62217400  | -1.38594800 |
| C | -2.67259200 | 4.24743200  | 0.71888300  |
| C | -1.52574200 | 2.84996100  | -2.59280400 |
| C | -0.50988800 | 4.50842200  | -1.08382400 |
| C | -1.58332100 | 5.13954200  | 1.00209700  |
| C | -3.70942100 | 4.12676700  | 1.70041200  |
| C | -0.44576000 | 2.94320700  | -3.41908700 |
| H | -2.32360800 | 2.14909500  | -2.80677400 |
| C | 0.59621400  | 4.58893900  | -1.98925800 |

|   |             |             |             |
|---|-------------|-------------|-------------|
| C | -0.53451300 | 5.25685200  | 0.09070200  |
| C | -1.57321600 | 5.86329700  | 2.23584000  |
| H | -4.54229800 | 3.46130000  | 1.50031800  |
| C | -3.65826900 | 4.82334100  | 2.87336300  |
| C | 0.63342900  | 3.82697800  | -3.11704600 |
| H | -0.39765600 | 2.33140300  | -4.31434700 |
| H | 1.40126300  | 5.27946100  | -1.74978000 |
| H | 0.29523700  | 5.92400800  | 0.31659400  |
| C | -2.57440800 | 5.70817900  | 3.14919800  |
| H | -0.74063400 | 6.53573300  | 2.42896000  |
| H | -4.45225900 | 4.70880000  | 3.60451500  |
| H | 1.48010000  | 3.88716900  | -3.79527100 |
| H | -2.55631600 | 6.26086600  | 4.08391400  |
| C | 3.65108100  | -1.40693800 | -0.48907500 |
| C | 2.70395300  | -0.66901000 | 0.24153000  |
| N | 4.51902500  | -1.99456600 | 0.38277900  |
| H | 1.77084600  | -0.34416900 | -0.19861100 |
| C | 5.52640200  | -2.98756900 | 0.07220500  |
| H | 5.36821900  | -3.33936600 | -0.94792000 |
| H | 6.53454900  | -2.57365400 | 0.16837300  |
| H | 5.41381800  | -3.82965200 | 0.76069400  |
| C | 3.58919300  | -1.67650300 | -1.94877900 |
| C | 2.51476000  | -2.37896500 | -2.37033000 |
| C | 2.11140500  | -2.54351100 | -3.81681200 |
| C | 1.48912900  | -2.99265900 | -1.45028200 |
| C | 0.74232300  | -1.85680300 | -4.03388600 |
| H | 2.00175700  | -3.61440300 | -4.03780100 |
| H | 2.84908800  | -2.13899300 | -4.51439600 |
| C | 0.14277000  | -2.27428200 | -1.62482000 |
| H | 1.35518300  | -4.04264200 | -1.74848800 |
| H | 1.79826600  | -2.99419300 | -0.40199300 |
| C | -0.32949200 | -2.38221200 | -3.07237400 |
| H | 0.43304400  | -1.99324800 | -5.07623600 |
| H | 0.86287600  | -0.77727900 | -3.86922700 |
| H | -0.59993000 | -2.68876300 | -0.93752500 |
| H | 0.25028400  | -1.21559000 | -1.36422400 |
| H | -1.25858300 | -1.81646500 | -3.19666300 |
| H | -0.55291000 | -3.43420500 | -3.30355900 |
| C | 4.59046800  | -1.04671700 | -2.91375000 |
| C | 4.03103000  | 0.25901300  | -3.50720600 |
| C | 5.98254000  | -0.78379600 | -2.32191800 |
| H | 4.73212100  | -1.75130600 | -3.74587500 |
| C | 4.96397100  | 0.84122000  | -4.57048700 |
| H | 3.91039800  | 0.99096800  | -2.69927100 |

|   |            |             |             |
|---|------------|-------------|-------------|
| H | 3.03460300 | 0.07846800  | -3.92517800 |
| C | 6.92914900 | -0.18218600 | -3.36647300 |
| H | 5.89534300 | -0.10566000 | -1.46042400 |
| H | 6.42286100 | -1.71475000 | -1.95344700 |
| C | 6.36295400 | 1.08727100  | -4.00305800 |
| H | 4.54545600 | 1.77424100  | -4.96424400 |
| H | 5.02916300 | 0.13972000  | -5.41511400 |
| H | 7.90162600 | 0.02486000  | -2.90461400 |
| H | 7.10564700 | -0.93080100 | -4.15204300 |
| H | 7.03695700 | 1.44524600  | -4.78975500 |
| H | 6.29777900 | 1.87801400  | -3.24716400 |
| C | 2.95783500 | -0.92697600 | 1.63243600  |
| C | 4.13104200 | -1.70443400 | 1.69004800  |
| C | 2.33029600 | -0.53132900 | 2.81843600  |
| C | 4.73859000 | -2.05906500 | 2.89220300  |
| C | 2.93452000 | -0.87079600 | 4.02388300  |
| H | 1.38129900 | -0.00208700 | 2.78682200  |
| C | 4.12646700 | -1.61529500 | 4.06052300  |
| H | 5.65465400 | -2.64098000 | 2.92241100  |
| H | 2.47136400 | -0.56713400 | 4.95756700  |
| H | 4.57077000 | -1.86268100 | 5.01948200  |

**(S<sub>a</sub>,S)-Int4**

E = -4090.512006 a.u.

0 1

|   |             |            |             |
|---|-------------|------------|-------------|
| C | 2.26625900  | 1.86962200 | 1.00543300  |
| C | 2.53598600  | 2.55266900 | 2.18723600  |
| C | 1.49956400  | 3.14463400 | 2.91317600  |
| C | 0.18654700  | 3.02262000 | 2.45835900  |
| C | -0.07968600 | 2.36030600 | 1.26306300  |
| C | 0.95073400  | 1.80992700 | 0.50842800  |
| H | 3.54884300  | 2.62919800 | 2.57210700  |
| H | -0.64678600 | 3.45199600 | 3.00409100  |
| H | -1.10149600 | 2.28133300 | 0.91152200  |
| O | 1.86586200  | 3.80642800 | 4.05360200  |
| O | 0.77478200  | 1.19790900 | -0.68155200 |
| C | 0.83058000  | 4.41995300 | 4.78439700  |
| H | 0.11248300  | 3.68078000 | 5.16252000  |
| H | 1.30742400  | 4.92456700 | 5.62554300  |
| H | 0.28714600  | 5.15308900 | 4.17427300  |
| C | 4.73612500  | 1.51358400 | 0.48026900  |
| C | 5.31308200  | 2.45070800 | -0.39662200 |
| C | 5.53094600  | 1.05903700 | 1.53988600  |
| C | 6.63284500  | 2.86969800 | -0.24700000 |

|   |             |             |             |
|---|-------------|-------------|-------------|
| C | 6.85144700  | 1.47661300  | 1.69482000  |
| H | 5.11527000  | 0.37962000  | 2.27463600  |
| C | 7.41100000  | 2.37647900  | 0.79440300  |
| H | 7.02850100  | 3.57915800  | -0.96744700 |
| H | 7.43699300  | 1.09880500  | 2.52674300  |
| H | 8.44032600  | 2.70169300  | 0.90623000  |
| O | 4.61128200  | 2.92782300  | -1.47598300 |
| C | 3.78300800  | 4.05573900  | -1.20414000 |
| H | 4.38480600  | 4.88152100  | -0.80617600 |
| H | 3.34203300  | 4.34169000  | -2.15918800 |
| H | 2.98584800  | 3.80483400  | -0.49622100 |
| C | 3.30486700  | 1.08353700  | 0.23088800  |
| H | 3.09050900  | 1.23927800  | -0.83057400 |
| P | -2.22972400 | -0.15206600 | 0.14783600  |
| O | -1.39120700 | -0.61425000 | 1.27744500  |
| O | -3.26333000 | -1.35053300 | -0.36335900 |
| O | -3.31802500 | 0.96089900  | 0.75030600  |
| O | -1.65842600 | 0.42444000  | -1.11914500 |
| H | -0.19852500 | 1.00360500  | -0.87168200 |
| C | -5.80432600 | -1.96354100 | 2.20346000  |
| C | -5.16759900 | -1.44351100 | 1.07426100  |
| C | -3.95394300 | -1.97060200 | 0.65133400  |
| C | -3.43481900 | -3.11606600 | 1.27243300  |
| C | -4.11368400 | -3.64748800 | 2.37508000  |
| C | -5.27857500 | -3.06339900 | 2.86765500  |
| C | -7.03597900 | -1.14763600 | 2.52815000  |
| C | -6.82256000 | 0.12248800  | 1.68191400  |
| H | -3.70014800 | -4.52938800 | 2.85657600  |
| H | -5.76638400 | -3.46921600 | 3.74923500  |
| H | -7.94813900 | -1.67852500 | 2.22617300  |
| H | -7.75357000 | 0.62673100  | 1.40376300  |
| H | -6.19940500 | 0.83333900  | 2.23618500  |
| C | -6.02114900 | -0.36473000 | 0.44264300  |
| C | -5.43123700 | 0.78920300  | -0.34081000 |
| C | -6.98883100 | -0.96220300 | -0.61834500 |
| C | -6.31987400 | 1.20080800  | -1.33653800 |
| C | -4.22617000 | 1.45781500  | -0.15474900 |
| C | -7.49844100 | 0.25636200  | -1.40930000 |
| H | -6.40969300 | -1.61356800 | -1.28281200 |
| H | -7.78681600 | -1.55891300 | -0.16507400 |
| C | -6.04899300 | 2.32286700  | -2.10704800 |
| C | -3.95602600 | 2.62412300  | -0.88892600 |
| H | -7.77631300 | 0.00928700  | -2.43840000 |
| C | -4.88054300 | 3.03745800  | -1.85559100 |

|   |             |             |             |
|---|-------------|-------------|-------------|
| H | -6.73366400 | 2.64422200  | -2.88664300 |
| H | -4.65808600 | 3.93603900  | -2.42445900 |
| H | -8.38347200 | 0.69815600  | -0.93308600 |
| H | -7.12732000 | -0.93464500 | 3.59752600  |
| C | -2.23566200 | -3.82971800 | 0.75061900  |
| C | -1.06001600 | -3.91002500 | 1.52291400  |
| C | -2.31672000 | -4.50485000 | -0.48747900 |
| C | -0.88827500 | -3.15291300 | 2.72815600  |
| C | 0.02240700  | -4.74741600 | 1.08649700  |
| C | -1.21843100 | -5.32155100 | -0.92409700 |
| C | -3.46153900 | -4.41488200 | -1.34447800 |
| C | 0.26027700  | -3.25036000 | 3.45626600  |
| H | -1.66910800 | -2.45882700 | 3.01429700  |
| C | 1.20725500  | -4.82813900 | 1.88656800  |
| C | -0.09144000 | -5.44867300 | -0.11234400 |
| C | -1.30028200 | -5.99139000 | -2.18611200 |
| H | -4.30679800 | -3.81516600 | -1.02646800 |
| C | -3.49882400 | -5.06093200 | -2.54530700 |
| C | 1.32102300  | -4.10849000 | 3.03817600  |
| H | 0.38279600  | -2.65506400 | 4.35582000  |
| H | 2.00868500  | -5.48423600 | 1.55225700  |
| H | 0.72702700  | -6.09035500 | -0.43544700 |
| C | -2.40143900 | -5.86134500 | -2.97821900 |
| H | -0.45788500 | -6.60459200 | -2.49717200 |
| H | -4.37365000 | -4.96829300 | -3.18096500 |
| H | 2.22108800  | -4.17709100 | 3.64138200  |
| H | -2.45192000 | -6.36850800 | -3.93678300 |
| C | -2.76658700 | 3.48761900  | -0.63100000 |
| C | -1.73998000 | 3.60006900  | -1.58908300 |
| C | -2.72787000 | 4.27415700  | 0.54169700  |
| C | -1.70152700 | 2.78514600  | -2.76874100 |
| C | -0.67594100 | 4.54337200  | -1.38462900 |
| C | -1.65958900 | 5.21463200  | 0.73284900  |
| C | -3.71535100 | 4.16675300  | 1.57472800  |
| C | -0.68924100 | 2.90976100  | -3.67345500 |
| H | -2.46988600 | 2.03298500  | -2.89983600 |
| C | 0.35551800  | 4.65570900  | -2.37034300 |
| C | -0.66571700 | 5.33369000  | -0.23742000 |
| C | -1.62346200 | 6.00057000  | 1.92763900  |
| H | -4.53070000 | 3.46314100  | 1.44627300  |
| C | -3.63936800 | 4.92364500  | 2.70797700  |
| C | 0.35302900  | 3.86513100  | -3.47899400 |
| H | -0.66857200 | 2.27051500  | -4.55063200 |
| H | 1.13543700  | 5.39618800  | -2.20986900 |

|   |             |             |             |
|---|-------------|-------------|-------------|
| H | 0.14354100  | 6.04546300  | -0.08620600 |
| C | -2.57834100 | 5.85908300  | 2.89075400  |
| H | -0.80754000 | 6.70900300  | 2.04988600  |
| H | -4.39566900 | 4.81805000  | 3.47944600  |
| H | 1.14262300  | 3.95541300  | -4.21966000 |
| H | -2.53967700 | 6.45828000  | 3.79568800  |
| C | 3.76489400  | -1.40327200 | -0.36746800 |
| C | 2.97273100  | -0.44227600 | 0.46848900  |
| N | 4.41172300  | -2.23525700 | 0.41063200  |
| H | 1.92470400  | -0.52639600 | 0.13609500  |
| C | 5.17505300  | -3.40002200 | -0.01397900 |
| H | 5.09866300  | -3.49247000 | -1.09626000 |
| H | 6.21817700  | -3.28198500 | 0.28766000  |
| H | 4.74578500  | -4.28171000 | 0.46846400  |
| C | 3.65435800  | -1.55428500 | -1.83779700 |
| C | 2.55670600  | -2.22602000 | -2.24285600 |
| C | 2.12613500  | -2.34298300 | -3.68318500 |
| C | 1.54919500  | -2.85134000 | -1.31023600 |
| C | 0.77357100  | -1.61004800 | -3.84586800 |
| H | 1.97821500  | -3.40479500 | -3.92378700 |
| H | 2.87030000  | -1.94677200 | -4.37831400 |
| C | 0.19678800  | -2.13781900 | -1.45397300 |
| H | 1.42570300  | -3.90175900 | -1.60886500 |
| H | 1.86513700  | -2.86634500 | -0.26015600 |
| C | -0.29022400 | -2.17525700 | -2.89910200 |
| H | 0.45005800  | -1.68359200 | -4.88983200 |
| H | 0.91940400  | -0.54487900 | -3.61967700 |
| H | -0.53592000 | -2.58707900 | -0.77983000 |
| H | 0.30578500  | -1.09492100 | -1.14362500 |
| H | -1.21300600 | -1.59176400 | -2.97256500 |
| H | -0.52669700 | -3.21206400 | -3.18182400 |
| C | 4.69880400  | -0.94821700 | -2.77071800 |
| C | 4.20091100  | 0.34947600  | -3.43143300 |
| C | 6.05691900  | -0.71401000 | -2.08991000 |
| H | 4.86527400  | -1.68191400 | -3.57401600 |
| C | 5.22825700  | 0.89528300  | -4.42457800 |
| H | 4.02428700  | 1.10638200  | -2.66095600 |
| H | 3.24006100  | 0.16889900  | -3.92496000 |
| C | 7.08328600  | -0.14260500 | -3.07204400 |
| H | 5.93423300  | -0.01243700 | -1.25359700 |
| H | 6.44057600  | -1.65145200 | -1.66651800 |
| C | 6.57233800  | 1.13715600  | -3.73628600 |
| H | 4.85501500  | 1.82504000  | -4.86654100 |
| H | 5.36142200  | 0.17917800  | -5.24875600 |

|   |            |             |             |
|---|------------|-------------|-------------|
| H | 8.02565500 | 0.04827400  | -2.54700800 |
| H | 7.29496500 | -0.89292500 | -3.84715400 |
| H | 7.31154800 | 1.50847200  | -4.45461100 |
| H | 6.43987100 | 1.91492000  | -2.97337700 |
| C | 3.18072000 | -0.97050000 | 1.85574100  |
| C | 4.11531100 | -2.00115600 | 1.78615000  |
| C | 2.65919200 | -0.60878900 | 3.09145100  |
| C | 4.63225700 | -2.65520300 | 2.89178600  |
| C | 3.16009800 | -1.25350700 | 4.22500600  |
| H | 1.88717300 | 0.14934800  | 3.16684500  |
| C | 4.14326800 | -2.24299200 | 4.13177100  |
| H | 5.37331900 | -3.44333400 | 2.80802100  |
| H | 2.77533400 | -0.98006200 | 5.20206100  |
| H | 4.51625100 | -2.71612700 | 5.03413200  |

**(S<sub>a</sub>,R)-Int3**

E = -4090.497009 a.u.

0 1

|   |             |             |              |
|---|-------------|-------------|--------------|
| C | -1.13684200 | 15.04595700 | -9.47143700  |
| C | -1.21075000 | 15.08479900 | -8.10227800  |
| N | -0.28892900 | 14.01662700 | -9.85257600  |
| H | -1.79435800 | 15.79466200 | -7.53300900  |
| C | -0.02217700 | 13.64131500 | -11.22224300 |
| H | -0.94549000 | 13.34232900 | -11.72995200 |
| H | 0.42690200  | 14.47936000 | -11.76607100 |
| H | 0.68839800  | 12.81357800 | -11.23589300 |
| C | -1.87392700 | 15.86331500 | -10.46807900 |
| C | -3.20285300 | 15.66805500 | -10.58895000 |
| C | -4.15279000 | 16.54143500 | -11.38002400 |
| C | -3.94462700 | 14.55147000 | -9.88203900  |
| C | -5.23180300 | 17.10952300 | -10.43995400 |
| H | -4.64099800 | 15.93658200 | -12.15910900 |
| H | -3.64608300 | 17.36826900 | -11.87715700 |
| C | -5.02007900 | 15.10311800 | -8.93650100  |
| H | -4.44828000 | 13.94729600 | -10.65310100 |
| H | -3.26254400 | 13.89167000 | -9.34343400  |
| C | -5.98845200 | 16.00830600 | -9.69769500  |
| H | -4.73523300 | 17.76650000 | -9.71467000  |
| H | -5.55843000 | 14.27761300 | -8.45790800  |
| H | -4.52839400 | 15.67588100 | -8.13916900  |
| H | -6.72414000 | 16.44795400 | -9.01475000  |
| H | -6.54966200 | 15.40294300 | -10.42361700 |
| C | -1.03444000 | 16.87311300 | -11.24930600 |
| C | -1.15295700 | 16.71956100 | -12.77901800 |



|   |             |             |              |
|---|-------------|-------------|--------------|
| C | -1.25642600 | 18.33251600 | -10.79957000 |
| H | 0.01699700  | 16.64577700 | -11.00683800 |
| C | -0.22280600 | 17.68894800 | -13.51092000 |
| H | -2.18113700 | 16.91023700 | -13.10548900 |
| H | -0.93353700 | 15.68291700 | -13.06331400 |
| C | -0.36145800 | 19.30056500 | -11.57551200 |
| H | -2.30726600 | 18.61612100 | -10.94664000 |
| H | -1.05392600 | 18.42517300 | -9.72643200  |
| C | -0.51152600 | 19.12951800 | -13.08719100 |
| H | -0.33866600 | 17.57291200 | -14.59518700 |
| H | 0.81971700  | 17.43798700 | -13.27160100 |
| H | -0.58618600 | 20.32966600 | -11.27368100 |
| H | 0.68394800  | 19.11865700 | -11.29142300 |
| H | 0.13820600  | 19.83534900 | -13.61800200 |
| H | -1.54302600 | 19.37751600 | -13.37566800 |
| C | -0.41682000 | 14.00562400 | -7.59881500  |
| C | 0.14539200  | 13.35402100 | -8.72576300  |
| C | -0.14860000 | 13.49855700 | -6.31739700  |
| C | 0.96916600  | 12.22853500 | -8.59492300  |
| C | 0.66478300  | 12.38788700 | -6.18412500  |
| H | -0.57475700 | 13.98195000 | -5.44161700  |
| C | 1.22267600  | 11.76130400 | -7.31567800  |
| H | 1.40193400  | 11.73623200 | -9.46149400  |
| H | 0.88779300  | 11.99726800 | -5.19614200  |
| H | 1.86148300  | 10.89349300 | -7.18306900  |
| C | 2.59126900  | 15.96393200 | -9.15874200  |
| C | 2.88840700  | 14.73343000 | -9.84411500  |
| C | 3.09526500  | 14.70504300 | -11.18568800 |
| C | 3.06985500  | 15.92970800 | -11.95199700 |
| C | 2.81358800  | 17.12394900 | -11.36435200 |
| C | 2.54084000  | 17.22066800 | -9.93691500  |
| H | 2.84775000  | 13.79372100 | -9.30670700  |
| H | 3.25341000  | 15.89928100 | -13.02140100 |
| H | 2.80142100  | 18.04841000 | -11.93397700 |
| O | 3.28742100  | 13.48190800 | -11.76614200 |
| O | 2.31540700  | 18.31126400 | -9.38727600  |
| C | 3.30050200  | 13.40576100 | -13.17407400 |
| H | 4.16572000  | 13.92569700 | -13.60299400 |
| H | 3.37004100  | 12.34535800 | -13.41701300 |
| H | 2.38025700  | 13.81635700 | -13.60981700 |
| C | 2.65147600  | 15.20522300 | -6.71642400  |
| C | 2.05827400  | 15.49960600 | -5.46059500  |
| C | 3.61598700  | 14.18826900 | -6.76769600  |
| C | 2.44111500  | 14.80487700 | -4.31300900  |

|   |             |             |              |
|---|-------------|-------------|--------------|
| C | 3.98828900  | 13.48450900 | -5.62878400  |
| H | 4.12176400  | 13.98892300 | -7.70571400  |
| C | 3.40248600  | 13.80064900 | -4.40646000  |
| H | 1.99252400  | 15.03352900 | -3.35373000  |
| H | 4.74548100  | 12.71075100 | -5.69115100  |
| H | 3.69543800  | 13.26513200 | -3.50849200  |
| O | 1.12289000  | 16.46847900 | -5.47418600  |
| C | 0.55795300  | 16.87930200 | -4.24674100  |
| H | 1.33120200  | 17.24119600 | -3.55976000  |
| H | -0.11957900 | 17.69615300 | -4.49113200  |
| H | -0.00155700 | 16.06009600 | -3.77923400  |
| C | 2.36501600  | 16.10430900 | -7.81442000  |
| H | 1.98837000  | 17.08038600 | -7.51714000  |
| P | 1.43733700  | 21.57498700 | -9.18927900  |
| O | 0.17381000  | 20.97135900 | -8.75305600  |
| O | 1.31233900  | 22.90378000 | -10.11986600 |
| O | 2.27071100  | 22.12174900 | -7.89671400  |
| O | 2.45325700  | 20.77022100 | -10.07031200 |
| H | 2.41900000  | 19.77232500 | -9.88916500  |
| C | 0.39686600  | 25.82474700 | -8.09862600  |
| C | 1.16954500  | 24.86980900 | -8.76440100  |
| C | 0.54952500  | 23.92085900 | -9.56513000  |
| C | -0.83119300 | 23.96420600 | -9.79362600  |
| C | -1.57244600 | 24.96748300 | -9.15637700  |
| C | -0.97635000 | 25.88296700 | -8.29326700  |
| C | 1.26940700  | 26.66101100 | -7.19056700  |
| C | 2.55605600  | 25.81857800 | -7.10994500  |
| H | -2.64407300 | 24.99977200 | -9.33023300  |
| H | -1.58036500 | 26.62433000 | -7.77831900  |
| H | 1.46548900  | 27.64645300 | -7.63214000  |
| H | 3.45327800  | 26.40524800 | -6.89020100  |
| H | 2.44749600  | 25.05533600 | -6.33111400  |
| C | 2.64012400  | 25.10466800 | -8.48937500  |
| C | 3.66288700  | 23.98632100 | -8.47579100  |
| C | 3.27983800  | 26.05786500 | -9.53759800  |
| C | 4.91760300  | 24.48456100 | -8.83829700  |
| C | 3.52986900  | 22.64886200 | -8.12706600  |
| C | 4.79618000  | 25.91648500 | -9.30813500  |
| H | 3.02283500  | 25.69456400 | -10.53894700 |
| H | 2.91456300  | 27.08501200 | -9.44254300  |
| C | 6.04691800  | 23.68102500 | -8.76515000  |
| C | 4.65602100  | 21.82212400 | -8.01677600  |
| H | 5.38232700  | 26.11035200 | -10.21124000 |
| C | 5.90833900  | 22.36635800 | -8.32835900  |

|   |             |             |              |
|---|-------------|-------------|--------------|
| H | 7.02335400  | 24.06650500 | -9.04365200  |
| H | 6.78053400  | 21.72419300 | -8.24619700  |
| H | 5.14956500  | 26.61404400 | -8.53811800  |
| H | 0.81174100  | 26.83201100 | -6.21179300  |
| C | -1.52921300 | 23.00835700 | -10.69837100 |
| C | -2.52813900 | 22.16245500 | -10.17647300 |
| C | -1.26634200 | 23.02921700 | -12.08453500 |
| C | -2.77173900 | 22.03808700 | -8.76928800  |
| C | -3.33108200 | 21.37768000 | -11.07085200 |
| C | -2.05140500 | 22.20964400 | -12.96421400 |
| C | -0.25461500 | 23.85794600 | -12.67049600 |
| C | -3.77652000 | 21.24703200 | -8.29791400  |
| H | -2.11581600 | 22.55827100 | -8.08129100  |
| C | -4.38034800 | 20.56468000 | -10.53583200 |
| C | -3.07637000 | 21.42191700 | -12.44017000 |
| C | -1.77490500 | 22.22446400 | -14.36798200 |
| H | 0.33408100  | 24.50268600 | -12.02736800 |
| C | -0.02157900 | 23.84501300 | -14.01401100 |
| C | -4.60770200 | 20.51126800 | -9.19372600  |
| H | -3.93722400 | 21.15815700 | -7.22826600  |
| H | -4.98860500 | 19.98872700 | -11.22939200 |
| H | -3.68574100 | 20.82300200 | -13.11491600 |
| C | -0.78806300 | 23.01118000 | -14.88035900 |
| H | -2.37324000 | 21.58689800 | -15.01407600 |
| H | 0.75549000  | 24.47661300 | -14.43297800 |
| H | -5.41055100 | 19.89535500 | -8.79908500  |
| H | -0.58391800 | 23.01282200 | -15.94648200 |
| C | 4.57439700  | 20.40535300 | -7.56095000  |
| C | 5.01534100  | 19.37407500 | -8.41407800  |
| C | 4.16163500  | 20.10501500 | -6.24379200  |
| C | 5.33162200  | 19.59939200 | -9.79596200  |
| C | 5.12928800  | 18.03372500 | -7.91121700  |
| C | 4.24415500  | 18.75309700 | -5.76669600  |
| C | 3.68868700  | 21.10303000 | -5.33142300  |
| C | 5.74974400  | 18.57755500 | -10.59700100 |
| H | 5.19438800  | 20.59424300 | -10.20492100 |
| C | 5.59990700  | 16.99659300 | -8.77676300  |
| C | 4.75700800  | 17.75701000 | -6.59747300  |
| C | 3.82721800  | 18.44964500 | -4.43238000  |
| H | 3.64090100  | 22.13516800 | -5.65945400  |
| C | 3.29903400  | 20.77656300 | -4.06547200  |
| C | 5.89889300  | 17.25463000 | -10.08022000 |
| H | 5.96338900  | 18.76631700 | -11.64475200 |
| H | 5.68460200  | 15.99091800 | -8.37115600  |

|   |             |             |              |
|---|-------------|-------------|--------------|
| H | 4.85881000  | 16.74413000 | -6.21343900  |
| C | 3.36254600  | 19.42870800 | -3.60559300  |
| H | 3.89915200  | 17.41618500 | -4.09840300  |
| H | 2.93908200  | 21.55123100 | -3.39581400  |
| H | 6.22964300  | 16.45491400 | -10.73609300 |
| H | 3.05238000  | 19.19264500 | -2.59168300  |
| H | -5.93007600 | 17.73111600 | -11.01360200 |

**(S<sub>a</sub>,R)-TS2**

E = -4090.475907 a.u.

0 1

|   |             |             |              |
|---|-------------|-------------|--------------|
| C | -0.71335500 | 14.81961300 | -9.63757900  |
| C | -0.38160100 | 14.65996600 | -8.27432500  |
| N | -0.18595300 | 13.78580600 | -10.33543000 |
| H | -0.85455400 | 15.22914000 | -7.48382600  |
| C | -0.22315500 | 13.62983300 | -11.77538200 |
| H | -1.20903900 | 13.92216000 | -12.13882800 |
| H | 0.54720500  | 14.25103500 | -12.24608700 |
| H | -0.04777300 | 12.58303600 | -12.02219000 |
| C | -1.58698900 | 15.83336100 | -10.28787500 |
| C | -2.91245000 | 15.70663600 | -10.06973700 |
| C | -3.97895000 | 16.64227500 | -10.59243700 |
| C | -3.52345800 | 14.61236500 | -9.21722600  |
| C | -4.74891000 | 17.26632000 | -9.41511100  |
| H | -4.68211200 | 16.05740800 | -11.20403400 |
| H | -3.57587300 | 17.43064500 | -11.22556900 |
| C | -4.27376900 | 15.21855500 | -8.02103600  |
| H | -4.25026800 | 14.06662900 | -9.83730800  |
| H | -2.78540400 | 13.88273900 | -8.87647000  |
| C | -5.34627500 | 16.19800200 | -8.49843500  |
| H | -4.05957400 | 17.90563500 | -8.84886100  |
| H | -4.71987200 | 14.42023900 | -7.41806400  |
| H | -3.55326800 | 15.74597700 | -7.38142900  |
| H | -5.84352000 | 16.66759100 | -7.64272000  |
| H | -6.11764100 | 15.64027200 | -9.04801700  |
| C | -0.89978300 | 16.87130300 | -11.17797400 |
| C | -1.29570300 | 16.77503100 | -12.66706300 |
| C | -1.04934700 | 18.32320300 | -10.66293000 |
| H | 0.17724800  | 16.64343000 | -11.14532500 |
| C | -0.45073400 | 17.73290900 | -13.50765200 |
| H | -2.35483800 | 17.03036800 | -12.79546900 |
| H | -1.17996900 | 15.75144200 | -13.03468000 |
| C | -0.32055000 | 19.32661000 | -11.56166500 |
| H | -2.11057400 | 18.59991200 | -10.61528600 |

|   |             |             |              |
|---|-------------|-------------|--------------|
| H | -0.65877000 | 18.40861100 | -9.64347700  |
| C | -0.67849000 | 19.16691700 | -13.03816600 |
| H | -0.70356300 | 17.62308100 | -14.56884400 |
| H | 0.61129600  | 17.46651400 | -13.39762200 |
| H | -0.54885000 | 20.33866100 | -11.21099700 |
| H | 0.76188500  | 19.20231900 | -11.43899100 |
| H | -0.10832200 | 19.88080600 | -13.64354900 |
| H | -1.73934400 | 19.41029500 | -13.18507500 |
| C | 0.21367600  | 13.34705100 | -8.15297300  |
| C | 0.38225100  | 12.85815800 | -9.46206600  |
| C | 0.67607600  | 12.58122900 | -7.07808500  |
| C | 1.02753100  | 11.65590100 | -9.74075000  |
| C | 1.30006700  | 11.36817100 | -7.34098900  |
| H | 0.55842000  | 12.93221700 | -6.05662900  |
| C | 1.48137500  | 10.91492900 | -8.65596500  |
| H | 1.19169000  | 11.31262200 | -10.75644000 |
| H | 1.66272100  | 10.76460800 | -6.51528100  |
| H | 1.98537500  | 9.97049000  | -8.83195100  |
| C | 2.20768100  | 15.97730000 | -9.31530700  |
| C | 2.73033200  | 14.87508600 | -10.01815500 |
| C | 3.26700800  | 15.03506600 | -11.28369800 |
| C | 3.33577100  | 16.32171300 | -11.85193700 |
| C | 2.88290700  | 17.42893100 | -11.15604200 |
| C | 2.30879100  | 17.28739900 | -9.87824300  |
| H | 2.67340600  | 13.87115100 | -9.61280000  |
| H | 3.76026300  | 16.46616300 | -12.83960200 |
| H | 2.97081200  | 18.42779800 | -11.57307700 |
| O | 3.68206600  | 13.89124300 | -11.91250800 |
| O | 1.87667100  | 18.29605600 | -9.16270000  |
| C | 4.32700400  | 14.03951500 | -13.15522400 |
| H | 5.21707400  | 14.67619700 | -13.07267400 |
| H | 4.62797000  | 13.03833300 | -13.46449000 |
| H | 3.65459500  | 14.46372600 | -13.91225000 |
| C | 2.01984000  | 15.29306900 | -6.83852100  |
| C | 1.39964000  | 15.64856700 | -5.61208500  |
| C | 3.12006100  | 14.42396200 | -6.80456000  |
| C | 1.90148800  | 15.16307300 | -4.40316300  |
| C | 3.61676300  | 13.93654400 | -5.60322200  |
| H | 3.60907300  | 14.16389200 | -7.73620700  |
| C | 3.00661200  | 14.31380800 | -4.40825900  |
| H | 1.44230400  | 15.44655300 | -3.46360300  |
| H | 4.47674500  | 13.27628600 | -5.59644100  |
| H | 3.39186300  | 13.94603900 | -3.46223300  |
| O | 0.32094100  | 16.44811900 | -5.70768000  |

|   |             |             |              |
|---|-------------|-------------|--------------|
| C | -0.18739200 | 17.05278200 | -4.52854900  |
| H | 0.59988400  | 17.61615700 | -4.01749000  |
| H | -0.96588700 | 17.73684000 | -4.86236200  |
| H | -0.61773700 | 16.30087000 | -3.85769700  |
| C | 1.53533200  | 15.92982500 | -8.04467800  |
| H | 0.93949800  | 16.81777300 | -7.85112400  |
| P | 1.38018100  | 21.51723700 | -9.25275900  |
| O | 0.03156600  | 21.09913500 | -8.81874900  |
| O | 1.33977400  | 22.83576000 | -10.25166700 |
| O | 2.14158400  | 22.17028900 | -7.93239900  |
| O | 2.35314800  | 20.58080100 | -9.94399300  |
| H | 2.09123200  | 19.25523200 | -9.55562400  |
| C | 0.54207300  | 25.92524500 | -8.44647500  |
| C | 1.27383300  | 24.88493700 | -9.02478300  |
| C | 0.62348800  | 23.90824200 | -9.77197400  |
| C | -0.75416900 | 24.00906400 | -10.01406200 |
| C | -1.45425500 | 25.08868700 | -9.46119100  |
| C | -0.82403800 | 26.03884300 | -8.66340100  |
| C | 1.44039200  | 26.78295800 | -7.58528200  |
| C | 2.66789300  | 25.87430900 | -7.39797400  |
| H | -2.52195500 | 25.15688100 | -9.64988800  |
| H | -1.39507000 | 26.84593500 | -8.21349700  |
| H | 1.70946200  | 27.71332100 | -8.10227000  |
| H | 3.59387400  | 26.41980500 | -7.19067600  |
| H | 2.48689000  | 25.18087600 | -6.56890600  |
| C | 2.74848600  | 25.05044000 | -8.71546900  |
| C | 3.69067800  | 23.87405900 | -8.56400800  |
| C | 3.49693600  | 25.87051700 | -9.80233400  |
| C | 4.99216200  | 24.26043500 | -8.89126400  |
| C | 3.43740200  | 22.58093600 | -8.12294500  |
| C | 4.98954500  | 25.65150100 | -9.48560900  |
| H | 3.26077400  | 25.44188300 | -10.78265800 |
| H | 3.19982500  | 26.92405500 | -9.80826400  |
| C | 6.05872100  | 23.39649700 | -8.68174800  |
| C | 4.49957800  | 21.69621600 | -7.88474500  |
| H | 5.62688400  | 25.72724800 | -10.37184400 |
| C | 5.80330000  | 22.13393600 | -8.15273100  |
| H | 7.07443600  | 23.69362800 | -8.92668300  |
| H | 6.62413900  | 21.44677400 | -7.96718300  |
| H | 5.35558000  | 26.39087300 | -8.76157800  |
| H | 0.96990700  | 27.06474900 | -6.63847100  |
| C | -1.50559800 | 23.03623500 | -10.85680700 |
| C | -2.52955000 | 22.26003500 | -10.27859900 |
| C | -1.28085000 | 22.98871400 | -12.24846600 |

|   |             |             |              |
|---|-------------|-------------|--------------|
| C | -2.74064600 | 22.20990500 | -8.86187400  |
| C | -3.39167000 | 21.47775500 | -11.11877400 |
| C | -2.14120300 | 22.19279000 | -13.07749100 |
| C | -0.23337700 | 23.72926000 | -12.88723900 |
| C | -3.76714300 | 21.48767400 | -8.33069200  |
| H | -2.03928900 | 22.72677900 | -8.21827900  |
| C | -4.45752100 | 20.73067200 | -10.52121600 |
| C | -3.18626800 | 21.47423100 | -12.49718400 |
| C | -1.91235100 | 22.15521100 | -14.48947100 |
| H | 0.41901800  | 24.34390700 | -12.27721700 |
| C | -0.04371300 | 23.66341500 | -14.23606100 |
| C | -4.65073200 | 20.74896600 | -9.17235300  |
| H | -3.90533900 | 21.45552600 | -7.25460900  |
| H | -5.11368300 | 20.15855000 | -11.17385000 |
| H | -3.84888200 | 20.89081500 | -13.13445200 |
| C | -0.89412200 | 22.86234200 | -15.05412000 |
| H | -2.56992300 | 21.53978500 | -15.09872100 |
| H | 0.76262800  | 24.22584200 | -14.69626700 |
| H | -5.46947700 | 20.18939400 | -8.72875600  |
| H | -0.72616100 | 22.82285900 | -16.12602800 |
| C | 4.29069000  | 20.32211000 | -7.34676500  |
| C | 4.75965500  | 19.21188300 | -8.08014100  |
| C | 3.74230100  | 20.13194900 | -6.05953500  |
| C | 5.25044700  | 19.33336800 | -9.42263400  |
| C | 4.75541700  | 17.90556100 | -7.48368500  |
| C | 3.70624400  | 18.81325200 | -5.49126500  |
| C | 3.25218900  | 21.21413900 | -5.25778400  |
| C | 5.76778700  | 18.25726600 | -10.08233000 |
| H | 5.16973300  | 20.29489200 | -9.91646100  |
| C | 5.31496600  | 16.80486200 | -8.20892300  |
| C | 4.22964400  | 17.73547500 | -6.20426100  |
| C | 3.17901100  | 18.63167400 | -4.17316600  |
| H | 3.28573600  | 22.22002400 | -5.65914500  |
| C | 2.74586200  | 21.00062400 | -4.00944300  |
| C | 5.81944000  | 16.97315800 | -9.46287600  |
| H | 6.12203400  | 18.36984300 | -11.10292700 |
| H | 5.33445100  | 15.83236800 | -7.72346700  |
| H | 4.24461100  | 16.74897300 | -5.74331300  |
| C | 2.70584300  | 19.68841900 | -3.45344000  |
| H | 3.18558300  | 17.62605800 | -3.75775200  |
| H | 2.37548800  | 21.83805600 | -3.42678400  |
| H | 6.23715100  | 16.12973400 | -10.00513000 |
| H | 2.31494500  | 19.54152000 | -2.45047400  |
| H | -5.53733500 | 17.91970100 | -9.80432000  |

**(S<sub>a</sub>,R)-Int4**

E = -4090.503618 a.u.

0 1

|   |             |             |              |
|---|-------------|-------------|--------------|
| C | -0.75783700 | 14.70567300 | -9.53489600  |
| C | 0.10933300  | 14.54944900 | -8.31356500  |
| N | -0.84249200 | 13.55776700 | -10.16168600 |
| H | -0.54299900 | 14.74058100 | -7.44613600  |
| C | -1.67966100 | 13.24588600 | -11.31369800 |
| H | -2.40084200 | 14.04875900 | -11.45012300 |
| H | -1.05269400 | 13.13997300 | -12.20190500 |
| H | -2.19841000 | 12.30711400 | -11.11027000 |
| C | -1.52641900 | 15.90723500 | -9.94220600  |
| C | -2.72882900 | 16.04150200 | -9.34770600  |
| C | -3.70407700 | 17.17053500 | -9.56748100  |
| C | -3.20525200 | 15.13767400 | -8.22775400  |
| C | -3.77084600 | 18.02447800 | -8.28687600  |
| H | -4.69468100 | 16.72855100 | -9.74901700  |
| H | -3.46281900 | 17.78776200 | -10.43195400 |
| C | -3.20625900 | 15.95478200 | -6.92204800  |
| H | -4.23239200 | 14.81330200 | -8.44246000  |
| H | -2.60994700 | 14.22584700 | -8.11420600  |
| C | -4.12018400 | 17.17472100 | -7.06116800  |
| H | -2.80524400 | 18.52750600 | -8.14831800  |
| H | -3.52814000 | 15.32434100 | -6.08565800  |
| H | -2.17751800 | 16.28132800 | -6.71351200  |
| H | -4.07105300 | 17.78770700 | -6.15512800  |
| H | -5.15810700 | 16.82444900 | -7.15134700  |
| C | -0.87392700 | 16.79174900 | -11.01490700 |
| C | -1.50034900 | 16.56642100 | -12.40524500 |
| C | -0.80578800 | 18.29497900 | -10.65562700 |
| H | 0.16845200  | 16.45748200 | -11.10605800 |
| C | -0.72272500 | 17.34316400 | -13.46762400 |
| H | -2.55031100 | 16.89423100 | -12.39774700 |
| H | -1.49637300 | 15.50128100 | -12.66010300 |
| C | -0.12649700 | 19.10566700 | -11.76581400 |
| H | -1.80680100 | 18.71463400 | -10.50353500 |
| H | -0.26351400 | 18.43718200 | -9.71456300  |
| C | -0.74413900 | 18.83124900 | -13.13676200 |
| H | -1.15318200 | 17.15349500 | -14.45803700 |
| H | 0.31407200  | 16.97572500 | -13.48642900 |
| H | -0.20744900 | 20.16718100 | -11.50883900 |
| H | 0.94339300  | 18.86962400 | -11.79247300 |
| H | -0.23138700 | 19.41582900 | -13.90902000 |



|   |             |             |              |
|---|-------------|-------------|--------------|
| H | -1.78994700 | 19.16127500 | -13.13225100 |
| C | 0.48505600  | 13.09109500 | -8.36462800  |
| C | -0.08899400 | 12.54040500 | -9.50756000  |
| C | 1.20739200  | 12.26126000 | -7.51393500  |
| C | 0.05262800  | 11.21687900 | -9.88995900  |
| C | 1.36325500  | 10.92012000 | -7.87076200  |
| H | 1.64020600  | 12.63895200 | -6.59452700  |
| C | 0.80719900  | 10.40635800 | -9.04325400  |
| H | -0.38978200 | 10.82486200 | -10.79920800 |
| H | 1.93199000  | 10.26366100 | -7.22082800  |
| H | 0.95484200  | 9.36250600  | -9.29778500  |
| C | 2.01190800  | 15.88769000 | -9.44860500  |
| C | 2.31436900  | 14.90865600 | -10.39301800 |
| C | 2.92321400  | 15.24216100 | -11.60386400 |
| C | 3.24145900  | 16.57585500 | -11.86446500 |
| C | 2.96563000  | 17.55723200 | -10.91552500 |
| C | 2.36131100  | 17.23030000 | -9.69771200  |
| H | 2.09136600  | 13.85953200 | -10.21594200 |
| H | 3.70598000  | 16.86878800 | -12.79921800 |
| H | 3.20190900  | 18.59982200 | -11.10624500 |
| O | 3.15653900  | 14.19979200 | -12.46188400 |
| O | 2.05785700  | 18.13902900 | -8.76362200  |
| C | 3.77165400  | 14.51507000 | -13.68719500 |
| H | 4.76049100  | 14.96625000 | -13.53643700 |
| H | 3.88381400  | 13.57359000 | -14.22612800 |
| H | 3.15540600  | 15.20273700 | -14.28124400 |
| C | 2.09976100  | 15.22314900 | -6.99094200  |
| C | 1.57702400  | 15.38973200 | -5.69557300  |
| C | 3.33535700  | 14.60421200 | -7.13961400  |
| C | 2.28327600  | 14.93197100 | -4.58260400  |
| C | 4.04792200  | 14.13721100 | -6.03386600  |
| H | 3.73959000  | 14.48931600 | -8.14122900  |
| C | 3.51649300  | 14.30129100 | -4.76018800  |
| H | 1.88362500  | 15.06134300 | -3.58327500  |
| H | 5.01113400  | 13.65629800 | -6.17010900  |
| H | 4.05946000  | 13.94684600 | -3.88956200  |
| O | 0.34673300  | 15.96812700 | -5.62692900  |
| C | -0.11403000 | 16.39836100 | -4.35922300  |
| H | 0.61004900  | 17.07774400 | -3.89723500  |
| H | -1.04507500 | 16.93413100 | -4.54406700  |
| H | -0.30953800 | 15.54598200 | -3.69759600  |
| C | 1.24567900  | 15.62084500 | -8.17697200  |
| H | 0.73476700  | 16.55396100 | -7.91750600  |
| P | 1.27721300  | 21.44778100 | -9.28130100  |

|   |             |             |              |
|---|-------------|-------------|--------------|
| O | -0.13225300 | 21.07627100 | -9.01809800  |
| O | 1.36186500  | 22.77528900 | -10.28372000 |
| O | 1.88159100  | 22.11551900 | -7.88121300  |
| O | 2.30481900  | 20.48999700 | -9.82578100  |
| H | 2.19404800  | 19.07263500 | -9.12872400  |
| C | 0.09251800  | 25.75588800 | -8.56081400  |
| C | 0.97557300  | 24.78639900 | -9.04296200  |
| C | 0.52993300  | 23.80993200 | -9.92778600  |
| C | -0.77530600 | 23.87853500 | -10.43556200 |
| C | -1.62576100 | 24.89271100 | -9.97814300  |
| C | -1.21479900 | 25.81677300 | -9.02205600  |
| C | 0.77303000  | 26.61187200 | -7.51627400  |
| C | 2.02450600  | 25.78048900 | -7.17848500  |
| H | -2.63708200 | 24.93034700 | -10.37348600 |
| H | -1.90505100 | 26.56803700 | -8.64905600  |
| H | 1.04561700  | 27.59255800 | -7.92751700  |
| H | 2.86290100  | 26.37777000 | -6.80604000  |
| H | 1.77447800  | 25.02984100 | -6.42031400  |
| C | 2.36582900  | 25.04188600 | -8.50256000  |
| C | 3.37301100  | 23.93365500 | -8.28768100  |
| C | 3.17601800  | 25.98383900 | -9.43766900  |
| C | 4.66914200  | 24.42807300 | -8.44561200  |
| C | 3.16329400  | 22.60385000 | -7.93697100  |
| C | 4.62972700  | 25.85344400 | -8.94798500  |
| H | 3.09809400  | 25.60233300 | -10.46202300 |
| H | 2.79677700  | 27.01064000 | -9.42555000  |
| C | 5.76927900  | 23.62644900 | -8.17476300  |
| C | 4.26045300  | 21.78188500 | -7.63921700  |
| H | 5.36346000  | 26.03993300 | -9.73814400  |
| C | 5.55033800  | 22.31957700 | -7.75158500  |
| H | 6.78051800  | 24.00551300 | -8.29181300  |
| H | 6.39376700  | 21.67481700 | -7.52105700  |
| H | 4.84156900  | 26.56257700 | -8.13705800  |
| H | 0.13556700  | 26.79442000 | -6.64572300  |
| C | -1.28651700 | 22.95114900 | -11.48173300 |
| C | -2.39102600 | 22.12299500 | -11.19942500 |
| C | -0.76298500 | 23.00824700 | -12.79021500 |
| C | -2.89312000 | 21.95701400 | -9.86772300  |
| C | -3.04296900 | 21.41580900 | -12.26409900 |
| C | -1.40786300 | 22.27474100 | -13.84359600 |
| C | 0.38135800  | 23.80074300 | -13.13156400 |
| C | -3.99222300 | 21.18725300 | -9.62638600  |
| H | -2.35228600 | 22.42083500 | -9.05172400  |
| C | -4.18195700 | 20.60109700 | -11.96568600 |

|   |             |             |              |
|---|-------------|-------------|--------------|
| C | -2.55061200 | 21.52789000 | -13.56343900 |
| C | -0.87212400 | 22.33670500 | -15.16954000 |
| H | 0.87122500  | 24.37437700 | -12.35314900 |
| C | 0.86308400  | 23.83249200 | -14.40672600 |
| C | -4.65207600 | 20.50019700 | -10.68955000 |
| H | -4.35882000 | 21.08071000 | -8.61018500  |
| H | -4.66661400 | 20.07436300 | -12.78453800 |
| H | -3.04901000 | 20.99513500 | -14.37150200 |
| C | 0.23188100  | 23.08523800 | -15.44472700 |
| H | -1.37054200 | 21.76761600 | -15.95038100 |
| H | 1.73818800  | 24.43142900 | -14.63840600 |
| H | -5.52586900 | 19.88933200 | -10.47556200 |
| H | 0.63347000  | 23.12189600 | -16.45277100 |
| C | 4.12842600  | 20.37229700 | -7.17718900  |
| C | 4.75480400  | 19.34486300 | -7.91375100  |
| C | 3.52441200  | 20.08061200 | -5.93649600  |
| C | 5.29374800  | 19.56587900 | -9.22380900  |
| C | 4.85522900  | 18.02562000 | -7.35905700  |
| C | 3.60472000  | 18.74800200 | -5.40768500  |
| C | 2.86725700  | 21.07550100 | -5.14037500  |
| C | 5.93686700  | 18.56827900 | -9.89738400  |
| H | 5.14210600  | 20.53422700 | -9.68717700  |
| C | 5.55341400  | 17.01318800 | -8.09138700  |
| C | 4.28408000  | 17.75870900 | -6.11605900  |
| C | 3.02939600  | 18.46837000 | -4.12715000  |
| H | 2.80581200  | 22.08990700 | -5.51621000  |
| C | 2.31802400  | 20.76690300 | -3.93079100  |
| C | 6.08681200  | 17.27454000 | -9.31779100  |
| H | 6.32145400  | 18.75259400 | -10.89624000 |
| H | 5.65177000  | 16.03164200 | -7.63601400  |
| H | 4.37524100  | 16.76435300 | -5.68496500  |
| C | 2.39983800  | 19.44172300 | -3.41002900  |
| H | 3.12813800  | 17.45757500 | -3.73771700  |
| H | 1.81969300  | 21.53799400 | -3.35170100  |
| H | 6.60899500  | 16.49690100 | -9.86726700  |
| H | 1.97432500  | 19.22041000 | -2.43494600  |
| H | -4.52102800 | 18.80864300 | -8.41734800  |

**(R<sub>a</sub>,S)-Int3**

E = -4090.497684 a.u.

0 1

|   |            |             |            |
|---|------------|-------------|------------|
| C | 8.26788400 | -1.84097900 | 1.60047500 |
| C | 9.36436000 | -2.67689400 | 1.16995800 |
| C | 9.72427900 | -3.76986500 | 1.88314800 |

|   |             |             |             |
|---|-------------|-------------|-------------|
| C | 9.00597200  | -4.11695000 | 3.09271100  |
| C | 7.99820700  | -3.35414200 | 3.57860400  |
| C | 7.59922000  | -2.13244800 | 2.89520900  |
| H | 9.91621900  | -2.42928600 | 0.27031100  |
| H | 9.27812600  | -5.01190900 | 3.64235100  |
| H | 7.48374700  | -3.62381000 | 4.49715600  |
| O | 10.76584600 | -4.51724700 | 1.42056700  |
| O | 6.71710800  | -1.37582600 | 3.33552400  |
| C | 11.06330700 | -5.72935900 | 2.07755500  |
| H | 11.40719500 | -5.56274100 | 3.10562400  |
| H | 11.86631500 | -6.19137100 | 1.50303200  |
| H | 10.19562200 | -6.40145700 | 2.09397900  |
| C | 8.00941400  | -0.49107100 | -0.51419600 |
| C | 7.94421100  | 0.85474700  | -0.94156000 |
| C | 8.17419000  | -1.49511000 | -1.47682800 |
| C | 8.02858100  | 1.17142500  | -2.29539900 |
| C | 8.26454700  | -1.18107800 | -2.82974100 |
| H | 8.17573600  | -2.53380000 | -1.15907400 |
| C | 8.18833800  | 0.14798400  | -3.23185000 |
| H | 7.97611300  | 2.20050200  | -2.62990600 |
| H | 8.38423700  | -1.97784000 | -3.55709400 |
| H | 8.25295400  | 0.40460300  | -4.28487600 |
| O | 7.79977900  | 1.77376300  | 0.04830800  |
| C | 7.61202900  | 3.12279900  | -0.32552500 |
| H | 8.49205900  | 3.51489700  | -0.84794100 |
| H | 7.46385000  | 3.67458900  | 0.60311600  |
| H | 6.72676700  | 3.23596300  | -0.96468300 |
| C | 7.74819800  | -0.80617200 | 0.88247100  |
| H | 7.01974900  | -0.17877300 | 1.39635700  |
| H | 5.64479400  | -1.69747800 | 4.34892000  |
| C | 4.32370800  | -2.90096700 | -1.61406700 |
| C | 4.78595900  | -3.37117800 | -0.41062300 |
| N | 5.15843300  | -3.34216200 | -2.63196500 |
| H | 4.33631600  | -3.17929000 | 0.55454400  |
| C | 5.09418500  | -2.96673800 | -4.02468300 |
| H | 4.22965300  | -2.31817900 | -4.17249200 |
| H | 4.99415800  | -3.85170700 | -4.66218200 |
| H | 5.99788000  | -2.41681300 | -4.31185800 |
| C | 3.12993900  | -2.06394100 | -1.89642600 |
| C | 3.25570300  | -0.72536500 | -1.91359700 |
| C | 2.09901300  | 0.24271600  | -1.99481900 |
| C | 4.57919700  | -0.02574400 | -1.71380300 |
| C | 2.04747800  | 1.09010000  | -0.70845300 |
| H | 2.24872600  | 0.91744700  | -2.85046900 |

|   |             |             |             |
|---|-------------|-------------|-------------|
| H | 1.14182200  | -0.26289100 | -2.14223500 |
| C | 4.53811700  | 0.80590000  | -0.42435600 |
| H | 4.75494600  | 0.65336200  | -2.56274300 |
| H | 5.41316700  | -0.73267900 | -1.68605200 |
| C | 3.37831600  | 1.80258800  | -0.45627500 |
| H | 1.22857800  | 1.81469700  | -0.77430600 |
| H | 1.82778200  | 0.42755900  | 0.13956700  |
| H | 5.49049200  | 1.32674800  | -0.29004100 |
| H | 4.42621400  | 0.12680100  | 0.43326200  |
| H | 3.33248500  | 2.37344900  | 0.47926700  |
| H | 3.55341900  | 2.53056100  | -1.26211500 |
| C | 1.81150900  | -2.80226800 | -2.07548000 |
| C | 1.09744300  | -2.99522900 | -0.72695800 |
| C | 1.98096400  | -4.15978100 | -2.77614100 |
| H | 1.15690300  | -2.19430100 | -2.71513900 |
| C | -0.24663000 | -3.70546300 | -0.90313800 |
| H | 1.74794400  | -3.58600600 | -0.06558400 |
| H | 0.95819100  | -2.02041900 | -0.24372100 |
| C | 0.63333500  | -4.86046200 | -2.96131900 |
| H | 2.64152900  | -4.79574000 | -2.17025900 |
| H | 2.47360800  | -4.02512100 | -3.74725300 |
| C | -0.07536200 | -5.04775400 | -1.61843400 |
| H | -0.73367900 | -3.84189300 | 0.06940900  |
| H | -0.91500200 | -3.06769800 | -1.49921600 |
| H | 0.77728700  | -5.82768300 | -3.45496600 |
| H | -0.00302800 | -4.25686400 | -3.62382000 |
| H | -1.04708300 | -5.53305200 | -1.76133400 |
| H | 0.52804800  | -5.72121500 | -0.99245600 |
| C | 5.97440800  | -4.12843100 | -0.67802200 |
| C | 6.17248600  | -4.08867700 | -2.08148100 |
| C | 6.92394100  | -4.78552200 | 0.11954600  |
| C | 7.26842300  | -4.69421400 | -2.70372100 |
| C | 8.01730800  | -5.38152200 | -0.49198700 |
| H | 6.81598000  | -4.80441600 | 1.20222600  |
| C | 8.18763900  | -5.33951700 | -1.88901600 |
| H | 7.40011700  | -4.65496600 | -3.78146700 |
| H | 8.77402000  | -5.86672200 | 0.11825600  |
| H | 9.05590000  | -5.81442800 | -2.33463100 |
| P | 5.00149400  | -2.94459100 | 6.04704600  |
| O | 6.13736900  | -3.87777000 | 6.01345300  |
| O | 3.52539200  | -3.61922200 | 6.00102800  |
| O | 5.00159900  | -2.16937800 | 7.47316100  |
| O | 4.81917400  | -1.88377100 | 4.92550600  |
| C | 3.03404700  | -5.44208600 | 9.13066900  |

|   |             |             |             |
|---|-------------|-------------|-------------|
| C | 2.99041600  | -4.41494800 | 8.18433200  |
| C | 3.39819300  | -4.67503400 | 6.88798900  |
| C | 3.75187700  | -5.96489300 | 6.46730600  |
| C | 3.72175100  | -6.98729800 | 7.42038500  |
| C | 3.39341600  | -6.73011300 | 8.75360400  |
| C | 2.69727900  | -4.89108400 | 10.49941200 |
| C | 2.83461300  | -3.36814000 | 10.28742300 |
| H | 3.99191000  | -7.99282500 | 7.11043200  |
| H | 3.42822500  | -7.53159200 | 9.48582500  |
| H | 1.67458400  | -5.16102000 | 10.79192800 |
| H | 2.22382100  | -2.77499700 | 10.97519900 |
| H | 3.88151700  | -3.07154000 | 10.41524300 |
| C | 2.43608800  | -3.14416000 | 8.80156400  |
| C | 2.79586200  | -1.75715600 | 8.29060900  |
| C | 0.88564000  | -3.08990000 | 8.67159700  |
| C | 1.72256800  | -0.87913200 | 8.46655200  |
| C | 3.96870600  | -1.28311900 | 7.71887700  |
| C | 0.51772700  | -1.62872100 | 8.98705800  |
| H | 0.61728400  | -3.31865900 | 7.63402600  |
| H | 0.39003800  | -3.81832700 | 9.32069200  |
| C | 1.84267000  | 0.46456800  | 8.13590700  |
| C | 4.12251300  | 0.06732400  | 7.37200400  |
| H | -0.41354900 | -1.31228100 | 8.50837700  |
| C | 3.04562000  | 0.92906800  | 7.60636800  |
| H | 1.00761900  | 1.14519400  | 8.27427200  |
| H | 3.15720600  | 1.97656200  | 7.34098200  |
| H | 0.39640800  | -1.47359600 | 10.06687300 |
| H | 3.36531700  | -5.27039300 | 11.27812000 |
| C | 4.12240500  | -6.19697700 | 5.03950000  |
| C | 5.42551200  | -6.59777200 | 4.68200500  |
| C | 3.14885100  | -5.98382100 | 4.03938300  |
| C | 6.46501500  | -6.79583300 | 5.64916300  |
| C | 5.75290900  | -6.79440900 | 3.29611400  |
| C | 3.50054000  | -6.14401300 | 2.65640700  |
| C | 1.79739300  | -5.61768300 | 4.34536600  |
| C | 7.70229100  | -7.22970200 | 5.27460500  |
| H | 6.25732600  | -6.56735300 | 6.68797100  |
| C | 7.06635100  | -7.24393900 | 2.94135200  |
| C | 4.79115000  | -6.54847800 | 2.31665000  |
| C | 2.51439400  | -5.89796300 | 1.64805300  |
| H | 1.50346500  | -5.51580400 | 5.38433900  |
| C | 0.88014100  | -5.41079500 | 3.35857900  |
| C | 8.00459400  | -7.47925000 | 3.90182400  |
| H | 8.47223800  | -7.37728200 | 6.02548900  |

|   |             |             |             |
|---|-------------|-------------|-------------|
| H | 7.28498100  | -7.40172200 | 1.88708900  |
| H | 5.05185800  | -6.67556300 | 1.26753900  |
| C | 1.24272900  | -5.54438300 | 1.98669000  |
| H | 2.80933300  | -6.00093800 | 0.60554500  |
| H | -0.13902800 | -5.13953500 | 3.61574500  |
| H | 8.98959300  | -7.84996900 | 3.63031000  |
| H | 0.49732100  | -5.36913600 | 1.21736800  |
| C | 5.39726400  | 0.56829200  | 6.77628900  |
| C | 5.43021100  | 1.02301500  | 5.44134000  |
| C | 6.56929000  | 0.58627900  | 7.56046300  |
| C | 4.28105600  | 0.98484000  | 4.58401700  |
| C | 6.66601700  | 1.49755600  | 4.88259600  |
| C | 7.79719000  | 1.06628400  | 6.99133600  |
| C | 6.59100700  | 0.15170100  | 8.92601600  |
| C | 4.35209900  | 1.40838100  | 3.29013900  |
| H | 3.35562700  | 0.57581500  | 4.97325400  |
| C | 6.69870600  | 1.93176900  | 3.51849600  |
| C | 7.81598700  | 1.50884300  | 5.66935900  |
| C | 8.98176100  | 1.08111900  | 7.79389900  |
| H | 5.67061200  | -0.20259300 | 9.37755100  |
| C | 7.74013800  | 0.18339300  | 9.65907500  |
| C | 5.57674100  | 1.89964900  | 2.74771800  |
| H | 3.47125200  | 1.35369800  | 2.65609700  |
| H | 7.64735400  | 2.26844600  | 3.10662300  |
| H | 8.75075500  | 1.86390000  | 5.24050500  |
| C | 8.95895000  | 0.65242800  | 9.08627500  |
| H | 9.90139200  | 1.44415400  | 7.34260000  |
| H | 7.73137500  | -0.15147700 | 10.69157200 |
| H | 5.61459500  | 2.22377300  | 1.71162400  |
| H | 9.86331200  | 0.66673400  | 9.68637300  |

**(R<sub>a</sub>,S)-TS2**

E = -4090.469312 a.u.

0 1

|   |             |             |             |
|---|-------------|-------------|-------------|
| C | 7.48844200  | -2.82122900 | 1.01089300  |
| C | 8.67418000  | -3.54659200 | 0.75041800  |
| C | 9.27816100  | -4.28499000 | 1.74599400  |
| C | 8.69579700  | -4.31755900 | 3.03030500  |
| C | 7.53335400  | -3.62417800 | 3.31183900  |
| C | 6.90383400  | -2.86269900 | 2.31156300  |
| H | 9.15502400  | -3.49767500 | -0.21952800 |
| H | 9.14731200  | -4.89466600 | 3.83113200  |
| H | 7.12567300  | -3.66772100 | 4.31864700  |
| O | 10.42869800 | -4.94043400 | 1.41162700  |

|   |             |             |             |
|---|-------------|-------------|-------------|
| O | 5.77649000  | -2.19700000 | 2.49261500  |
| C | 11.18094700 | -5.49660700 | 2.46777100  |
| H | 11.44533600 | -4.73544000 | 3.21249900  |
| H | 12.09052900 | -5.89267300 | 2.01500400  |
| H | 10.63879900 | -6.30741100 | 2.96804200  |
| C | 7.53438600  | -1.61138800 | -1.21851500 |
| C | 7.90092300  | -0.25250400 | -1.36515700 |
| C | 7.94529800  | -2.51117100 | -2.20601200 |
| C | 8.57548300  | 0.18514900  | -2.50377200 |
| C | 8.60786300  | -2.07622000 | -3.35204500 |
| H | 7.76286500  | -3.57022200 | -2.07225000 |
| C | 8.90947100  | -0.72821600 | -3.50167800 |
| H | 8.85122100  | 1.22751200  | -2.61065900 |
| H | 8.90276400  | -2.79623800 | -4.10777400 |
| H | 9.43236200  | -0.37890400 | -4.38652300 |
| O | 7.58292300  | 0.55552900  | -0.32586300 |
| C | 8.20076600  | 1.82364100  | -0.24596300 |
| H | 9.29112200  | 1.72602400  | -0.29333900 |
| H | 7.90585500  | 2.23263900  | 0.72078800  |
| H | 7.86015700  | 2.49174500  | -1.04627100 |
| C | 6.84933400  | -1.98200000 | 0.04154200  |
| H | 6.25375900  | -1.18851500 | 0.48412000  |
| H | 5.53584800  | -2.06545400 | 3.50388100  |
| C | 4.31634600  | -2.42032600 | -1.34343300 |
| C | 5.05808700  | -3.10120900 | -0.34231200 |
| N | 4.57073200  | -2.99402700 | -2.54491300 |
| H | 4.79117000  | -3.03274500 | 0.70752900  |
| C | 4.21767500  | -2.47646700 | -3.85350400 |
| H | 3.57551300  | -1.60534800 | -3.72622300 |
| H | 3.68859400  | -3.24097100 | -4.42872800 |
| H | 5.13105800  | -2.18709600 | -4.38308600 |
| C | 3.17154200  | -1.48307200 | -1.18829600 |
| C | 3.25554400  | -0.15378200 | -1.35930700 |
| C | 2.06859200  | 0.77944500  | -1.28782100 |
| C | 4.54965700  | 0.58600600  | -1.57761700 |
| C | 2.25289400  | 1.77955800  | -0.13679800 |
| H | 2.02395600  | 1.34057500  | -2.23317000 |
| H | 1.11847800  | 0.25189100  | -1.19189500 |
| C | 4.76038900  | 1.62110100  | -0.45740500 |
| H | 4.49901200  | 1.11326100  | -2.54250600 |
| H | 5.39580500  | -0.10542000 | -1.62885400 |
| C | 3.55812900  | 2.55626800  | -0.30711700 |
| H | 1.40009600  | 2.46507000  | -0.09670000 |
| H | 2.26630000  | 1.22383500  | 0.80952400  |



|   |             |             |             |
|---|-------------|-------------|-------------|
| H | 5.65916100  | 2.20718900  | -0.66871300 |
| H | 4.94334300  | 1.08815200  | 0.48443200  |
| H | 3.71213600  | 3.23102500  | 0.54325400  |
| H | 3.47889300  | 3.18898200  | -1.20256700 |
| C | 1.83179800  | -2.19644400 | -0.96412500 |
| C | 1.90766400  | -3.51919800 | -0.18536300 |
| C | 1.11320200  | -2.42766000 | -2.30746200 |
| H | 1.20585400  | -1.52732000 | -0.36084400 |
| C | 0.50056800  | -4.08632300 | 0.02827900  |
| H | 2.51293700  | -4.25052000 | -0.74199300 |
| H | 2.40329200  | -3.37264300 | 0.78085800  |
| C | -0.28792800 | -3.00702100 | -2.10527400 |
| H | 1.70979900  | -3.13241000 | -2.90599000 |
| H | 1.06497100  | -1.48747200 | -2.87120600 |
| C | -0.22874200 | -4.30397600 | -1.29812200 |
| H | 0.55735000  | -5.02658300 | 0.58439200  |
| H | -0.07705000 | -3.38883500 | 0.65074000  |
| H | -0.76977800 | -3.17531000 | -3.07454900 |
| H | -0.90351700 | -2.27278000 | -1.56699700 |
| H | -1.23803700 | -4.69023100 | -1.12081500 |
| H | 0.30659800  | -5.06669300 | -1.88117800 |
| C | 5.61826200  | -4.26862600 | -0.99689900 |
| C | 5.35049300  | -4.13836700 | -2.36956900 |
| C | 6.40466000  | -5.33311900 | -0.54778000 |
| C | 5.85159700  | -5.01577200 | -3.32740800 |
| C | 6.90169700  | -6.22552300 | -1.49142700 |
| H | 6.61787600  | -5.45313600 | 0.51053100  |
| C | 6.63307900  | -6.06724700 | -2.86190400 |
| H | 5.65240800  | -4.88531600 | -4.38627000 |
| H | 7.51433700  | -7.06000800 | -1.16510000 |
| H | 7.04070300  | -6.78106400 | -3.57012100 |
| P | 5.27206600  | -2.75087300 | 5.99475100  |
| O | 6.43989000  | -3.61650800 | 6.27710500  |
| O | 3.90966800  | -3.66859000 | 5.74166400  |
| O | 4.87631500  | -1.99599900 | 7.40395200  |
| O | 5.23262100  | -1.74455000 | 4.87415400  |
| C | 3.05097100  | -5.43129400 | 8.82682900  |
| C | 3.06960900  | -4.45768800 | 7.82580200  |
| C | 3.76451500  | -4.69035900 | 6.64687200  |
| C | 4.35918900  | -5.93704700 | 6.40233100  |
| C | 4.27373800  | -6.91716900 | 7.39848700  |
| C | 3.64797300  | -6.66772900 | 8.61881800  |
| C | 2.36554500  | -4.89129000 | 10.06248700 |
| C | 2.34471100  | -3.37405100 | 9.78909900  |

|   |             |             |             |
|---|-------------|-------------|-------------|
| H | 4.73752200  | -7.88208700 | 7.21317700  |
| H | 3.63752000  | -7.42871900 | 9.39381800  |
| H | 1.34799700  | -5.29240900 | 10.15617100 |
| H | 1.53408200  | -2.84694400 | 10.30234100 |
| H | 3.29587300  | -2.93064200 | 10.10392200 |
| C | 2.23934600  | -3.25892700 | 8.24239000  |
| C | 2.52053600  | -1.85145100 | 7.74772800  |
| C | 0.75589300  | -3.41699700 | 7.80140200  |
| C | 1.33372600  | -1.11812300 | 7.67642800  |
| C | 3.72666800  | -1.24656000 | 7.41135700  |
| C | 0.14924700  | -2.01161500 | 7.96710300  |
| H | 0.73967900  | -3.70048200 | 6.74287300  |
| H | 0.23313600  | -4.19231700 | 8.37037300  |
| C | 1.35138900  | 0.23028200  | 7.34422100  |
| C | 3.77308200  | 0.11582400  | 7.07989200  |
| H | -0.69160100 | -1.82836000 | 7.29118900  |
| C | 2.57368100  | 0.83816600  | 7.06812100  |
| H | 0.42951500  | 0.80262200  | 7.29241600  |
| H | 2.61189300  | 1.89315400  | 6.81087400  |
| H | -0.21868700 | -1.85570800 | 8.98957400  |
| H | 2.89883900  | -5.14891300 | 10.98244700 |
| C | 5.04555100  | -6.25290000 | 5.11551700  |
| C | 6.40370100  | -6.63690500 | 5.11599100  |
| C | 4.30936100  | -6.28503800 | 3.91126800  |
| C | 7.23192600  | -6.51148100 | 6.27984900  |
| C | 7.00025700  | -7.15666700 | 3.91775000  |
| C | 4.93425800  | -6.75469900 | 2.70484000  |
| C | 2.92971000  | -5.90348500 | 3.84004100  |
| C | 8.52573300  | -6.94471100 | 6.27082500  |
| H | 6.82004600  | -6.01728400 | 7.15150800  |
| C | 8.35175100  | -7.62617600 | 3.95754600  |
| C | 6.25559200  | -7.19921300 | 2.74029800  |
| C | 4.17091200  | -6.80855700 | 1.49473400  |
| H | 2.43272400  | -5.56630600 | 4.74200000  |
| C | 2.23715600  | -5.96259400 | 2.66692000  |
| C | 9.08906400  | -7.53744300 | 5.10114000  |
| H | 9.14025700  | -6.82713900 | 7.15750900  |
| H | 8.77424200  | -8.05078500 | 3.04947600  |
| H | 6.70911800  | -7.59998300 | 1.83463600  |
| C | 2.86525800  | -6.42166700 | 1.47124200  |
| H | 4.65705800  | -7.17903300 | 0.59594200  |
| H | 1.19169700  | -5.66940200 | 2.64721400  |
| H | 10.11291900 | -7.90076300 | 5.12310700  |
| H | 2.29582200  | -6.48104800 | 0.54768200  |

|   |            |             |             |
|---|------------|-------------|-------------|
| C | 5.05500800 | 0.80488100  | 6.75512400  |
| C | 5.24395500 | 1.36477900  | 5.47556400  |
| C | 6.04384200 | 0.96419600  | 7.74741900  |
| C | 4.30210000 | 1.17812000  | 4.41196600  |
| C | 6.42062600 | 2.13986900  | 5.20124900  |
| C | 7.23358400 | 1.71267700  | 7.45102800  |
| C | 5.90507600 | 0.42579100  | 9.06826900  |
| C | 4.48280700 | 1.77324100  | 3.19897500  |
| H | 3.45221700 | 0.52784800  | 4.58284300  |
| C | 6.57296400 | 2.74885900  | 3.91395700  |
| C | 7.38828200 | 2.29247300  | 6.19264400  |
| C | 8.23160900 | 1.86979100  | 8.46452900  |
| H | 5.00736400 | -0.12975300 | 9.31498100  |
| C | 6.87775400 | 0.59916800  | 10.00747400 |
| C | 5.62820400 | 2.58528100  | 2.94589300  |
| H | 3.75225300 | 1.62053000  | 2.41034000  |
| H | 7.46050500 | 3.35105400  | 3.73464400  |
| H | 8.28178200 | 2.87676300  | 5.98196400  |
| C | 8.06456200 | 1.32899100  | 9.70296900  |
| H | 9.12748200 | 2.43380000  | 8.21804100  |
| H | 6.75207900 | 0.17668000  | 10.99940100 |
| H | 5.74379500 | 3.06397900  | 1.97587500  |
| H | 8.82900500 | 1.45200400  | 10.46393800 |

**(R<sub>a</sub>,S)-Int4**

E = -4090.508379 a.u.

0 1

|   |             |             |             |
|---|-------------|-------------|-------------|
| C | 7.78359200  | -2.69911800 | 0.96861800  |
| C | 9.04359400  | -3.16473000 | 0.61403200  |
| C | 9.88637300  | -3.71586100 | 1.58258700  |
| C | 9.46507500  | -3.78426300 | 2.91137800  |
| C | 8.20229700  | -3.32068200 | 3.27514600  |
| C | 7.36057000  | -2.77213900 | 2.30784900  |
| H | 9.39770300  | -3.10833100 | -0.41228000 |
| H | 10.09757700 | -4.21420100 | 3.67866200  |
| H | 7.86676200  | -3.39114100 | 4.30796400  |
| O | 11.10084400 | -4.16379900 | 1.13084300  |
| O | 6.12053500  | -2.32281100 | 2.55425300  |
| C | 11.94272800 | -4.76671200 | 2.08198300  |
| H | 12.23309300 | -4.06014400 | 2.87013100  |
| H | 12.83349300 | -5.09121200 | 1.54260300  |
| H | 11.46041900 | -5.63577100 | 2.54968100  |
| C | 7.41358900  | -1.61661300 | -1.28388100 |
| C | 8.20880900  | -0.45457000 | -1.15287800 |

|   |             |             |             |
|---|-------------|-------------|-------------|
| C | 7.32712500  | -2.20182800 | -2.54243300 |
| C | 8.89485400  | 0.07476400  | -2.24273700 |
| C | 7.99381100  | -1.66567300 | -3.64855100 |
| H | 6.73175700  | -3.09761800 | -2.68224300 |
| C | 8.78224400  | -0.53645500 | -3.49233500 |
| H | 9.50648300  | 0.96199700  | -2.12939800 |
| H | 7.90414700  | -2.14568700 | -4.61716100 |
| H | 9.31768200  | -0.11883800 | -4.33913900 |
| O | 8.21457100  | 0.09929800  | 0.08398600  |
| C | 9.10637100  | 1.16160900  | 0.34405300  |
| H | 10.13900000 | 0.86871400  | 0.12315300  |
| H | 9.00344300  | 1.37911400  | 1.40712800  |
| H | 8.84523600  | 2.05230700  | -0.24193800 |
| C | 6.76988900  | -2.11649100 | -0.00679200 |
| H | 6.32804400  | -1.25340900 | 0.50771700  |
| H | 5.94209000  | -2.16785100 | 3.56022100  |
| C | 4.27702500  | -2.65801300 | -0.64743500 |
| C | 5.59886100  | -3.14182800 | -0.12816200 |
| N | 3.81130200  | -3.52218500 | -1.52050300 |
| H | 5.37272800  | -3.38832400 | 0.92996200  |
| C | 2.54877900  | -3.44526300 | -2.24380800 |
| H | 2.06523200  | -2.49788300 | -2.01355700 |
| H | 1.91266300  | -4.28001300 | -1.93937100 |
| H | 2.75892200  | -3.51117100 | -3.31378800 |
| C | 3.50198100  | -1.47112800 | -0.20447100 |
| C | 3.55723700  | -0.34389500 | -0.94170700 |
| C | 2.76401900  | 0.90483800  | -0.62125700 |
| C | 4.40862000  | -0.19813400 | -2.17901200 |
| C | 3.63260600  | 2.17570200  | -0.61129500 |
| H | 2.00153700  | 1.01163500  | -1.40882400 |
| H | 2.22797100  | 0.81847200  | 0.32615200  |
| C | 5.32936100  | 1.02467300  | -2.05177600 |
| H | 3.74474900  | -0.04387000 | -3.04412400 |
| H | 5.00031600  | -1.09455200 | -2.38059400 |
| C | 4.49878500  | 2.29308900  | -1.86526000 |
| H | 2.97913500  | 3.04795500  | -0.50779600 |
| H | 4.27719000  | 2.15877200  | 0.27471300  |
| H | 5.98043200  | 1.08748900  | -2.93025900 |
| H | 5.97992900  | 0.88695300  | -1.17712700 |
| H | 5.14973500  | 3.17027000  | -1.78835100 |
| H | 3.86036800  | 2.44485500  | -2.74713100 |
| C | 2.59529800  | -1.63524100 | 1.02353200  |
| C | 2.97418800  | -2.76209200 | 1.99563500  |
| C | 1.12628800  | -1.80366600 | 0.58526000  |

|   |             |             |             |
|---|-------------|-------------|-------------|
| H | 2.66531300  | -0.69661400 | 1.59019400  |
| C | 2.01999300  | -2.78917200 | 3.19421500  |
| H | 2.92986300  | -3.73436400 | 1.47625600  |
| H | 3.99508600  | -2.62880000 | 2.36371800  |
| C | 0.18728800  | -1.78030900 | 1.79282000  |
| H | 1.01979500  | -2.77392200 | 0.07570400  |
| H | 0.85042600  | -1.02645000 | -0.13861400 |
| C | 0.55569900  | -2.89104900 | 2.77582500  |
| H | 2.29992700  | -3.61890100 | 3.84684600  |
| H | 2.16336100  | -1.87764000 | 3.79331900  |
| H | -0.85260200 | -1.87635600 | 1.46099800  |
| H | 0.27654600  | -0.80776300 | 2.29759600  |
| H | -0.09161400 | -2.84625900 | 3.65938700  |
| H | 0.38040700  | -3.86598100 | 2.29715100  |
| C | 5.81929500  | -4.40452600 | -0.90202200 |
| C | 4.71165600  | -4.60609700 | -1.72061700 |
| C | 6.87051300  | -5.31297100 | -0.94620500 |
| C | 4.57447500  | -5.67979500 | -2.58796700 |
| C | 6.76812700  | -6.39355800 | -1.82306600 |
| H | 7.74360300  | -5.17482500 | -0.31748900 |
| C | 5.63809700  | -6.58002200 | -2.62675900 |
| H | 3.69432700  | -5.81890000 | -3.20686700 |
| H | 7.58097100  | -7.11034200 | -1.87865400 |
| H | 5.58591100  | -7.43627900 | -3.29047900 |
| P | 5.30282000  | -2.84914600 | 5.97318600  |
| O | 6.32263500  | -3.68226800 | 6.64100900  |
| O | 4.11641500  | -3.80123100 | 5.27636000  |
| O | 4.40350600  | -2.08151800 | 7.13273300  |
| O | 5.60852600  | -1.83293100 | 4.91066000  |
| C | 2.70018700  | -5.73253600 | 8.03832700  |
| C | 2.84561500  | -4.72118600 | 7.08546100  |
| C | 3.76373100  | -4.87269800 | 6.05765000  |
| C | 4.37500400  | -6.11343600 | 5.83426900  |
| C | 4.16209500  | -7.14002000 | 6.75699700  |
| C | 3.36704500  | -6.94192300 | 7.88883400  |
| C | 1.78990000  | -5.25694900 | 9.15257800  |
| C | 1.67830100  | -3.73941900 | 8.87798000  |
| H | 4.64710900  | -8.09793200 | 6.59052600  |
| H | 3.26383900  | -7.73022800 | 8.62893700  |
| H | 0.80836500  | -5.74508200 | 9.09873100  |
| H | 0.74139300  | -3.30106900 | 9.23725600  |
| H | 2.51216500  | -3.21348800 | 9.35489700  |
| C | 1.83753700  | -3.61910400 | 7.33958900  |
| C | 2.05294900  | -2.20913500 | 6.82254700  |

|   |             |             |             |
|---|-------------|-------------|-------------|
| C | 0.48791300  | -3.97009900 | 6.63886100  |
| C | 0.84760700  | -1.64749600 | 6.39508500  |
| C | 3.23914600  | -1.48743900 | 6.71770400  |
| C | -0.27767700 | -2.63987200 | 6.57003200  |
| H | 0.70565100  | -4.31397200 | 5.61968900  |
| H | -0.05413700 | -4.76750800 | 7.15662100  |
| C | 0.81097400  | -0.36386900 | 5.86571100  |
| C | 3.22607500  | -0.18292700 | 6.19457400  |
| H | -1.01347700 | -2.60635000 | 5.76035300  |
| C | 2.00141200  | 0.35416400  | 5.77521300  |
| H | -0.12369500 | 0.07238200  | 5.52389300  |
| H | 1.99994800  | 1.36164900  | 5.36795400  |
| H | -0.81927400 | -2.44748700 | 7.50574000  |
| H | 2.20131500  | -5.47410600 | 10.14289200 |
| C | 5.13023100  | -6.33057300 | 4.56692700  |
| C | 6.52598000  | -6.50207400 | 4.55635200  |
| C | 4.39646800  | -6.40541000 | 3.36133600  |
| C | 7.31450300  | -6.37842300 | 5.74752800  |
| C | 7.19577800  | -6.80754300 | 3.32112200  |
| C | 5.08063500  | -6.67080000 | 2.12732600  |
| C | 2.96970200  | -6.26617500 | 3.31554800  |
| C | 8.65913000  | -6.60431000 | 5.71604200  |
| H | 6.82639300  | -6.05085100 | 6.65795900  |
| C | 8.60653300  | -7.04662800 | 3.33710700  |
| C | 6.46170700  | -6.87642900 | 2.13818500  |
| C | 4.32360400  | -6.75988500 | 0.91506800  |
| H | 2.43135800  | -6.10251700 | 4.24323600  |
| C | 2.28142000  | -6.35237100 | 2.13929300  |
| C | 9.31272200  | -6.96498100 | 4.49947100  |
| H | 9.24447000  | -6.49623400 | 6.62345200  |
| H | 9.09882300  | -7.28797000 | 2.39786500  |
| H | 6.97079900  | -7.11869000 | 1.20773300  |
| C | 2.96950600  | -6.59494200 | 0.91410500  |
| H | 4.85411300  | -6.98872800 | -0.00528300 |
| H | 1.19988000  | -6.25324400 | 2.13807800  |
| H | 10.38285300 | -7.15468900 | 4.50371600  |
| H | 2.40912600  | -6.68219900 | -0.01383900 |
| C | 4.44815900  | 0.66965300  | 6.10068400  |
| C | 4.97298800  | 1.01536400  | 4.84007700  |
| C | 5.02833500  | 1.18958100  | 7.27373500  |
| C | 4.48823900  | 0.43109500  | 3.62518000  |
| C | 6.07753200  | 1.92646800  | 4.75165500  |
| C | 6.13553200  | 2.09975100  | 7.17511800  |
| C | 4.54624300  | 0.85899700  | 8.58230800  |

|   |            |             |             |
|---|------------|-------------|-------------|
| C | 5.04960400 | 0.73632600  | 2.42189100  |
| H | 3.70827900 | -0.31992700 | 3.69331100  |
| C | 6.61340300 | 2.25357700  | 3.46361000  |
| C | 6.62449500 | 2.45666600  | 5.91937000  |
| C | 6.71161300 | 2.62932300  | 8.37333400  |
| H | 3.70972400 | 0.17482800  | 8.67292100  |
| C | 5.12423800 | 1.38322400  | 9.70012800  |
| C | 6.11941900 | 1.67645000  | 2.33265700  |
| H | 4.70999700 | 0.23337100  | 1.52027800  |
| H | 7.43823600 | 2.96092500  | 3.41686800  |
| H | 7.46059400 | 3.14977500  | 5.85110800  |
| C | 6.22611400 | 2.28326400  | 9.59773300  |
| H | 7.55061700 | 3.31394800  | 8.27931000  |
| H | 4.74665000 | 1.11325200  | 10.68136400 |
| H | 6.54370100 | 1.90858900  | 1.35860600  |
| H | 6.67340700 | 2.68821700  | 10.50022000 |
